# Supplementary material for: Identification of nuclear pore proteins at plasmodesmata
Source: Research Square preprint supplement (doi:10.21203/rs.3.rs-5279839/v1), 2024-10-25
Supplement: Supplementary file 3 [file b87ca10df919c04e9d36fdb4.xlsx]

## Sheet: Table S3
														z-score (iBAQ)			PD scores - Adapted from Gombos et al. 2023																NUPs found in different PD or CW proteomes
Majority protein IDs	AGIcode	Peptides	Razor + unique peptides	Unique peptides	Sequence coverage [%]	Unique + razor sequence coverage [%]	Unique sequence coverage [%]	Mol. weight [kDa]	Qvalue	Score	Intensity	iBAQ peptides	MS/MS count	Average of combined tissue groups-PD Fraction	Average of combined tissue groups-CW Fraction	Average of combined tissue groups-TC Fraction	PD/CW	PD/TC	(PD/CW)+(PD/TC)	PD Enrichment score (transformed)	PD Feature score (transformed)	PD score (V1.5)	PD confidence cluster	MAPMAN (3.6)	DESCRIPTION	PFAM	bin1	binshort	SUBA5	SUBA5 short	Annotation of PD proteins/contaminant	PDLPs and MCTPs (PD marker proteins)	NUP	NUP part	Fernandez-Calvino et al. 2011	Kirk et al. 2022	Kraner et al. 2017	Gombos et al. 2023
AT1G10850.1	AT1G10850	4	4	4	9	9	9	72.737	0	10.892	31015000	30	3	-0.937111	NaN	NaN	3	3	6	1	0.846154	1.84615	HC	signalling.receptor kinases.leucine rich repeat III	ATP binding / protein binding / protein kinase/ protein serine/threonine kinase | chr1:3611747-3614613 FORWARD	PF13855,PF08263,PF00069	30	30.2	plasma membrane	PM	X	n.a	n.a	n.a	0	0	0	0
AT1G14890.1	AT1G14890	2	2	2	11.9	11.9	11.9	24.321	0.0058214	2.1906	46454000	8	5	-0.0126003	NaN	NaN	3	3	6	1	0.846154	1.84615	HC	misc.invertase/pectin methylesterase inhibitor family protein	enzyme inhibitor/ pectinesterase/ pectinesterase inhibitor | chr1:5137014-5137957 FORWARD	PF04043	26	26.18	extracellular	EX	X	n.a	n.a	n.a	0	0	0	0
AT1G33811.1	AT1G33811	2	2	2	8.6	8.6	8.6	41.697	0	44.732	39917000	19	8	-0.851627	NaN	NaN	3	3	6	1	0.846154	1.84615	HC	misc.GDSL-motif lipase	GDSL-motif lipase/hydrolase family protein | chr1:12267866-12269913 FORWARD	PF00657	26	26.28	extracellular	EX	X	n.a	n.a	n.a	0	0	0	0
AT1G62440.1	AT1G62440	10	9	9	15.5	14.1	14.1	85.484	0	63.26	1110000000	26	41	-0.208656	NaN	NaN	3	3	6	1	0.846154	1.84615	HC	cell wall.cell wall proteins.LRR	Symbols: LRX2 | LRX2 (LEUCINE-RICH REPEAT/EXTENSIN 2); protein binding / structural constituent of cell wall | chr1:23111818-23115293 FORWARD	PF08263,PF13855	10	10.5	extracellular	EX	X	n.a	n.a	n.a	0	0	0	0
AT4G30290.1;AT4G30280.1;AT1G65310.1;AT1G65310.2	AT4G30290	2	1	1	9.7	4	4	31.562	0.0064818	2.0959	20097000	17	2	-0.581221	NaN	NaN	3	3	6	1	0.846154	1.84615	HC	cell wall.modification	Symbols: ATXTH19, XTH19 | XTH19 (XYLOGLUCAN ENDOTRANSGLUCOSYLASE/HYDROLASE 19); hydrolase, acting on glycosyl bonds / hydrolase, hydrolyzing O-glycosyl compounds / xyloglucan:xyloglucosyl transferase | chr4:14828712-14830016 REVERSE	PF00722,PF06955	10	10.7	extracellular	EX	X	n.a	n.a	n.a	0	0	0	0
AT1G78610.1	AT1G78610	7	7	7	7.4	7.4	7.4	96.603	0	9.4401	432050000	53	10	-0.497755	NaN	NaN	3	3	6	1	0.846154	1.84615	HC	signalling.unspecified	Symbols: MSL6 | MSL6 (MECHANOSENSITIVE CHANNEL OF SMALL CONDUCTANCE-LIKE 6) | chr1:29569030-29572126 REVERSE	PF00924	30	30.99	plasma membrane	PM	X	n.a	n.a	n.a	0	0	0	0
AT1G80950.2;AT1G80950.1	AT1G80950	2	2	2	7.9	7.9	7.9	43.678	0	8.5736	38932000	23	2	-0.829441	NaN	NaN	3	3	6	1	0.846154	1.84615	HC	misc.acyl transferases	phospholipid/glycerol acyltransferase family protein | chr1:30412544-30415113 REVERSE	PF01553	26	26.5	endoplasmic reticulum	ER	X	n.a	n.a	n.a	0	0	0	0
AT2G37870.1	AT2G37870	2	2	2	12.2	12.2	12.2	11.985	0	6.9974	429660000	5	12	0.399884	NaN	NaN	3	3	6	1	0.846154	1.84615	HC	misc.protease inhibitor/seed storage/lipid transfer protein (LTP) family protein	protease inhibitor/seed storage/lipid transfer protein (LTP) family protein | chr2:15859239-15859907 FORWARD	PF14368	26	26.21	extracellular	EX	X	n.a	n.a	n.a	0	0	0	0
AT3G03305.1	AT3G03305	2	2	2	5	5	5	84.746	0	62.998	23238000	36	3	-1.6904	NaN	NaN	3	3	6	1	0.846154	1.84615	HC	misc.calcineurin-like phosphoesterase family protein	calcineurin-like phosphoesterase family protein | chr3:775368-778396 REVERSE	PF00149	26	26.27	golgi,plasma membrane	G,PM	X	n.a	n.a	n.a	0	0	0	0
AT3G03470.1	AT3G03470	3	3	3	7.2	7.2	7.2	59.254	0	8.1805	72866000	29	6	-1.03982	NaN	NaN	3	3	6	1	0.846154	1.84615	HC	misc.cytochrome P450	Symbols: CYP89A9 | CYP89A9; electron carrier/ heme binding / iron ion binding / monooxygenase/ oxygen binding | chr3:824552-826437 REVERSE	PF00067	26	26.10	endoplasmic reticulum	ER	X	n.a	n.a	n.a	0	0	0	0
AT3G10300.2;AT3G10300.5;AT3G10300.4;AT3G10300.3;AT3G10300.6;AT3G10300.1	AT3G10300	2	2	2	11.4	11.4	11.4	34.37	0	15.132	46975000	8	8	-0.245265	NaN	NaN	3	3	6	1	0.846154	1.84615	HC	signalling.calcium	calcium-binding EF hand family protein | chr3:3186321-3188301 FORWARD	PF13202,PF13405	30	30.3	plasma membrane,nucleus	PM,N	Likely PD protein	n.a	n.a	n.a	0	0	0	0
AT3G13390.1	AT3G13390	7	3	3	16.2	8.5	8.5	61.947	0	22.292	49175000	26	5	-0.896226	NaN	NaN	3	3	6	1	0.846154	1.84615	HC	misc.oxidases - copper, flavone etc	Symbols: sks11 | sks11 (SKU5 Similar 11); copper ion binding / oxidoreductase | chr3:4351045-4353393 REVERSE	PF00394,PF07731,PF07732	26	26.7	extracellular	EX	X	n.a	n.a	n.a	0	0	0	0
AT3G45960.1;AT3G45960.2	AT3G45960	3	3	3	13.5	13.5	13.5	23.392	0	5.2671	105670000	13	3	-0.416812	NaN	NaN	3	3	6	1	0.846154	1.84615	HC	cell wall.modification	Symbols: ATEXLA3, EXPL3, ATEXPL3, ATHEXP BETA 2.3 | ATEXLA3 (arabidopsis thaliana expansin-like a3) | chr3:16892756-16893900 FORWARD	PF01357,PF03330	10	10.7	extracellular	EX	X	n.a	n.a	n.a	0	0	0	0
AT4G28380.1	AT4G28380	1	1	1	4.1	4.1	4.1	42.701	0.0071505	2.0092	23440000	14	3	-0.609917	NaN	NaN	3	3	6	1	0.846154	1.84615	HC	cell wall.cell wall proteins.LRR	leucine-rich repeat family protein | chr4:14039756-14040931 REVERSE	PF13855,PF13855	10	10.5	extracellular	EX	X	n.a	n.a	n.a	0	0	0	0
AT4G36180.1;AT1G75640.1	AT4G36180	2	2	2	1.9	1.9	1.9	123.66	0	4.6806	32845000	39	3	-1.17964	NaN	NaN	3	3	6	1	0.846154	1.84615	HC	signalling.receptor kinases.leucine rich repeat VII	leucine-rich repeat family protein | chr4:17120085-17123841 REVERSE	PF00560,PF07714,PF08263,PF13855,PF13855,PF13855	30	30.2	plasma membrane	PM	X	n.a	n.a	n.a	0	0	0	0
AT4G37310.1	AT4G37310	1	1	1	4.4	4.4	4.4	58.227	0	71.519	50481000	28	8	-1.26233	NaN	NaN	3	3	6	1	0.846154	1.84615	HC	misc.cytochrome P450	Symbols: CYP81H1 | CYP81H1; electron carrier/ heme binding / iron ion binding / monooxygenase/ oxygen binding | chr4:17555927-17558943 REVERSE	PF00067	26	26.10	endoplasmic reticulum	ER	X	n.a	n.a	n.a	0	0	0	0
AT5G14450.1	AT5G14450	2	2	2	6.2	6.2	6.2	43.57	0.00019562	3.2042	47429000	19	4	-0.606485	NaN	NaN	3	3	6	1	0.846154	1.84615	HC	misc.GDSL-motif lipase	GDSL-motif lipase/hydrolase family protein | chr5:4658441-4660175 FORWARD	PF00657	26	26.28	extracellular	EX	X	n.a	n.a	n.a	0	0	0	0
AT5G25130.1	AT5G25130	4	3	2	10.3	7.7	4.4	56.731	0.00019885	3.5108	28642000	31	3	-1.39387	NaN	NaN	3	3	6	1	0.846154	1.84615	HC	misc.cytochrome P450	Symbols: CYP71B12 | CYP71B12; electron carrier/ heme binding / iron ion binding / monooxygenase/ oxygen binding | chr5:8668299-8670194 FORWARD	PF00067	26	26.10	endoplasmic reticulum	ER	X	n.a	n.a	n.a	0	0	0	0
AT5G43980.1	AT5G43980	2	2	2	7.6	7.6	7.6	32.606	0	15.765	75395000	12	2	-0.143266	NaN	NaN	3	3	6	1	0.846154	1.84615	HC	signalling.receptor kinases.misc	Symbols: PDLP1, PDLP1A | PDLP1 (PLASMODESMATA-LOCATED PROTEIN 1) | chr5:17694680-17696622 REVERSE	PF01657,PF01657	30	30.2	extracellular,plasma membrane	EX,PM	Likely PD protein	PDLP3	n.a	n.a	0	0	0	0
AT5G44030.3;AT5G44030.1;AT5G44030.2	AT5G44030	4	4	3	4.9	4.9	4	87.2	0	8.3024	40391000	38	11	-0.296147	NaN	NaN	3	3	6	1	0.846154	1.84615	HC	cell wall.cellulose synthesis.cellulose synthase	Symbols: CESA4, IRX5, NWS2 | CESA4 (CELLULOSE SYNTHASE A4); cellulose synthase/ transferase, transferring glycosyl groups | chr5:17714645-17719723 FORWARD	PF03552,PF14569	10	10.2	plasma membrane	PM	X	n.a	n.a	n.a	0	0	0	0
AT5G44380.1;AT5G44380.2	AT5G44380	3	1	1	5.4	2.2	2.2	60.616	0.0013326	2.7842	46387000	31	3	-1.06549	NaN	NaN	3	3	6	1	0.846154	1.84615	HC	misc.nitrilases, *nitrile lyases, berberine bridge enzymes, reticuline oxidases, troponine reductases	FAD-binding domain-containing protein | chr5:17878722-17881440 REVERSE	PF01565,PF08031	26	26.8	extracellular	EX	X	n.a	n.a	n.a	0	0	0	0
AT5G48380.1	AT5G48380	2	2	2	3.5	3.5	3.5	69.141	0.00019996	3.5841	190840000	30	3	0.741419	NaN	-1.23081	3	1.97223	4.97223	0.914353	0.846154	1.76051	HC	signalling.receptor kinases.leucine rich repeat X	leucine-rich repeat family protein / protein kinase family protein | chr5:19604089-19607059 REVERSE	PF07714,PF08263	30	30.2	plasma membrane	PM	X	n.a	n.a	n.a	0	0	0	0
AT3G05490.1	AT3G05490	3	2	2	15.1	7.6	7.6	13.03	0.00020044	3.6413	982290000	6	9	1.46035	-0.0656189	NaN	1.52597	3	4.52597	0.877164	0.846154	1.72332	HC	signalling.misc	Symbols: RALFL22 | RALFL22 (ralf-like 22); signal transducer | chr3:1591277-1591983 FORWARD	PF05498	30	30.8	extracellular	EX	X	n.a	n.a	n.a	0	0	0	0
AT2G03090.1	AT2G03090	3	3	3	19.8	19.8	19.8	27.076	0	64.478	542410000	5	14	1.18819	NaN	0.0338349	3	1.15435	4.15435	0.846196	0.846154	1.69235	HC	cell wall.modification	Symbols: ATEXPA15, EXP15, ATEXP15, ATHEXP ALPHA 1.3 | ATEXPA15 (ARABIDOPSIS THALIANA EXPANSIN A15) | chr2:916854-918643 REVERSE	PF01357,PF03330	10	10.7	extracellular	EX	Likely PD protein	n.a	n.a	n.a	0	0	0	0
AT5G08580.2;AT5G08580.1	AT5G08580	3	3	3	12	12	12	45.845	0	20.88	236090000	17	9	0.0146438	NaN	-1.10038	3	1.11502	4.11502	0.842918	0.846154	1.68907	HC	signalling.calcium	calcium-binding EF hand family protein | chr5:2780512-2783066 REVERSE	PF13202,PF13202,PF13202,PF13499	30	30.3	endoplasmic reticulum	ER	X	n.a	n.a	n.a	0	0	0	0
AT3G56060.1	AT3G56060	9	8	8	15.9	14.6	14.6	63.357	0	19.563	246290000	27	17	-0.36163	NaN	-1.40393	3	1.0423	4.0423	0.836859	0.846154	1.68301	HC	misc.nitrilases, *nitrile lyases, berberine bridge enzymes, reticuline oxidases, troponine reductases	glucose-methanol-choline (GMC) oxidoreductase family protein | chr3:20803133-20806013 REVERSE	PF00732,PF05199	26	26.8	extracellular	EX	X	n.a	n.a	n.a	0	0	0	0
AT3G62820.1	AT3G62820	7	7	7	45.4	45.4	45.4	21.459	0	43.883	1081400000	10	28	0.223418	NaN	-0.753589	3	0.977007	3.97701	0.831417	0.846154	1.67757	HC	misc.invertase/pectin methylesterase inhibitor family protein	invertase/pectin methylesterase inhibitor family protein | chr3:23229749-23230501 FORWARD	PF04043	26	26.18	extracellular	EX	X	n.a	n.a	n.a	0	0	0	0
AT5G62350.1	AT5G62350	3	3	3	27.7	27.7	27.7	22.179	0	27.975	781730000	6	15	0.666567	NaN	-0.304776	3	0.971343	3.97134	0.830945	0.846154	1.6771	HC	misc.invertase/pectin methylesterase inhibitor family protein	invertase/pectin methylesterase inhibitor family protein / DC 1.2 homolog (FL5-2I22) | chr5:25037426-25038362 FORWARD	PF04043	26	26.18	extracellular	EX	X	n.a	n.a	n.a	0	0	0	0
AT1G64390.1	AT1G64390	9	9	9	18.2	18.2	18.2	68.591	0	28.679	223640000	31	26	-0.474843	NaN	-1.44245	3	0.967609	3.96761	0.830634	0.846154	1.67679	HC	misc.gluco-, galacto- and mannosidases.endoglucanase	Symbols: AtGH9C2 | AtGH9C2 (Arabidopsis thaliana glycosyl hydrolase 9C2); carbohydrate binding / catalytic/ hydrolase, hydrolyzing O-glycosyl compounds | chr1:23911119-23915229 FORWARD	PF00759,PF09478	26	26.3	extracellular	EX	X	n.a	n.a	n.a	0	0	0	0
AT1G70530.1;AT1G70530.3;AT1G70530.2	AT1G70530	4	4	4	10.2	10.2	10.2	71.61	0	20.621	54121000	36	4	-0.609338	NaN	-1.53574	3	0.926406	3.92641	0.8272	0.846154	1.67335	HC	signalling.receptor kinases.DUF 26	protein kinase family protein | chr1:26588750-26591379 REVERSE	PF01657,PF01657,PF07714	30	30.2	plasma membrane	PM	X	n.a	n.a	n.a	0	0	0	0
AT1G53840.1	AT1G53840	3	3	3	6.5	6.5	6.5	64.148	0	14.792	52955000	34	4	-0.984526	NaN	-1.86919	3	0.884663	3.88466	0.823722	0.846154	1.66988	HC	cell wall.pectin*esterases.PME	Symbols: ATPME1 | ATPME1; pectinesterase | chr1:20101445-20103667 FORWARD	PF01095,PF04043	10	10.8	plasma membrane	PM	X	n.a	n.a	n.a	0	0	0	0
AT5G67070.1	AT5G67070	2	2	2	15.5	15.5	15.5	14.729	0	20.516	1496300000	5	17	1.20603	0.350253	NaN	0.85578	3	3.85578	0.821315	0.846154	1.66747	HC	signalling.misc	Symbols: RALFL34 | RALFL34 (ralf-like 34); signal transducer | chr5:26768020-26768846 FORWARD	PF05498	30	30.8	extracellular	EX	Likely PD protein	n.a	n.a	n.a	0	0	0	0
AT4G34150.1	AT4G34150	5	5	5	21.5	21.5	21.5	27.052	0	11.975	578940000	9	32	0.562805	NaN	-0.250407	3	0.813212	3.81321	0.817768	0.846154	1.66392	HC	signalling.calcium	C2 domain-containing protein | chr4:16354946-16357293 FORWARD	PF00168	30	30.3	plasma membrane	PM	Likely PD protein	n.a	n.a	n.a	0	0	0	0
AT3G19620.1	AT3G19620	2	2	2	3.1	3.1	3.1	85.499	0	5.2561	38094000	46	3	-1.02309	NaN	-1.793	3	0.769913	3.76991	0.814159	0.846154	1.66031	HC	cell wall.degradation.mannan-xylose-arabinose-fucose	glycosyl hydrolase family 3 protein | chr3:6815613-6818308 REVERSE	PF00933,PF01915,PF14310	10	10.6	extracellular	EX	X	n.a	n.a	n.a	0	0	0	0
AT5G58670.1;AT5G58700.2;AT4G38530.1;AT5G58700.3;AT5G58700.1	AT5G58670	2	2	2	4.1	4.1	4.1	64.313	0.00019643	3.2817	199920000	29	10	-0.526716	NaN	-1.26837	3	0.741654	3.74165	0.811804	0.846154	1.65796	HC	signalling.phosphinositides.phosphoinositide phospholipase C	Symbols: ATPLC1, ATPLC, PLC1 | PLC1 (PHOSPHOLIPASE C 1); phospholipase C | chr5:23704231-23706800 REVERSE	PF00168,PF00387,PF00388	30	30.4	plasma membrane	PM	X	n.a	n.a	n.a	0	0	0	0
AT4G37410.1	AT4G37410	3	3	3	10.6	10.6	10.6	57.168	0	8.8613	35661000	29	5	-1.14792	NaN	-1.82385	3	0.675927	3.67593	0.806327	0.846154	1.65248	HC	misc.cytochrome P450	Symbols: CYP81F4 | CYP81F4; electron carrier/ heme binding / iron ion binding / monooxygenase/ oxygen binding | chr4:17590772-17592920 FORWARD	PF00067	26	26.10	endoplasmic reticulum	ER	X	n.a	n.a	n.a	0	0	0	0
AT4G38420.1;AT4G38420.2;AT4G38420.3	AT4G38420	17	16	15	39.2	37.3	36.1	62.491	0	81.418	2717300000	25	81	0.131211	NaN	-0.533592	3	0.664803	3.6648	0.8054	0.846154	1.65155	HC	misc.oxidases - copper, flavone etc	Symbols: sks9 | sks9 (SKU5 Similar 9); copper ion binding / oxidoreductase | chr4:17982774-17985372 FORWARD	PF00394,PF07731,PF07732	26	26.7	extracellular	EX	X	n.a	n.a	n.a	0	0	0	0
AT2G31880.1	AT2G31880	2	2	2	3	3	3	71.111	0.00019486	3.1706	37984000	39	2	-0.927348	NaN	-1.59212	3	0.664768	3.66477	0.805397	0.846154	1.65155	HC	signalling.receptor kinases.leucine rich repeat XI	leucine-rich repeat transmembrane protein kinase, putative | chr2:13554894-13556977 FORWARD	PF00069,PF13855	30	30.2	plasma membrane	PM	X	n.a	n.a	n.a	0	0	0	0
AT4G15800.1;AT3G16570.3;AT3G16570.2;AT3G16570.1	AT4G15800	4	4	3	16.4	16.4	16.4	12.806	0	11.073	10807000000	6	50	1.8275	0.542324	-0.520941	1.28518	2.34844	3.63362	0.802801	0.846154	1.64896	HC	signalling.misc	Symbols: RALFL33 | RALFL33 (ralf-like 33); signal transducer | chr4:8984858-8985405 FORWARD	PF05498	30	30.8	extracellular	EX	X	n.a	n.a	n.a	0	0	0	0
AT4G35060.1	AT4G35060	7	7	7	50.3	50.3	50.3	17.162	0	15.59	396450000	10	15	0.17521	NaN	-0.453112	3	0.628322	3.62832	0.80236	0.846154	1.64851	HC	metal handling.binding, chelation and storage	heavy-metal-associated domain-containing protein / copper chaperone (CCH)-related | chr4:16685720-16686703 REVERSE	PF00403	15	15.2	plasma membrane	PM	X	n.a	n.a	n.a	0	0	0	0
AT1G75680.1	AT1G75680	9	9	9	27.2	27.2	27.2	57.868	0	24.63	522400000	23	18	-0.215659	NaN	-0.843863	3	0.628204	3.6282	0.80235	0.846154	1.6485	HC	misc.gluco-, galacto- and mannosidases.endoglucanase	Symbols: AtGH9B7 | AtGH9B7 (Arabidopsis thaliana glycosyl hydrolase 9B7); catalytic/ hydrolase, hydrolyzing O-glycosyl compounds | chr1:28417052-28419529 REVERSE	PF00759	26	26.3	plasma membrane	PM	X	n.a	n.a	n.a	0	0	0	0
AT3G29030.1	AT3G29030	2	2	2	12.9	12.9	12.9	27.611	0	28.747	293340000	5	10	0.707822	0.130283	NaN	0.577538	3	3.57754	0.798128	0.846154	1.64428	HC	cell wall.modification	Symbols: ATEXPA5, ATEXP5, ATHEXP ALPHA 1.4, EXP5, EXPA5 | EXPA5 (EXPANSIN A5) | chr3:11011308-11013358 REVERSE	PF01357,PF03330	10	10.7	extracellular	EX	X	n.a	n.a	n.a	0	0	0	0
AT4G25720.4;AT4G25720.2;AT4G25720.3;AT4G25720.1;AT4G25720.5	AT4G25720	2	2	2	9.2	9.2	9.2	30.907	0	4.8899	69636000	8	8	-0.255935	NaN	-0.787618	3	0.531683	3.53168	0.794307	0.846154	1.64046	HC	misc.misc2	Symbols: ATQC, QC, QCT | QC (GLUTAMINYL CYCLASE); catalytic/ glutaminyl-peptide cyclotransferase | chr4:13099818-13102578 REVERSE	PF05096	26	26.1	endoplasmic reticulum,mitochondrion	ER,M	X	n.a	n.a	n.a	0	0	0	0
AT3G18430.3;AT3G18430.2;AT3G18430.1	AT3G18430	4	4	4	31.4	31.4	31.4	20.032	0	8.3874	116960000	9	4	-0.253558	NaN	-0.781066	3	0.527508	3.52751	0.793959	0.846154	1.64011	HC	signalling.calcium	calcium-binding EF hand family protein | chr3:6325915-6327632 FORWARD	PF13499	30	30.3	plasma membrane	PM	X	n.a	n.a	n.a	0	0	0	0
AT2G03980.4;AT2G03980.3;AT2G03980.2;AT2G03980.1	AT2G03980	5	5	5	21.8	21.8	21.8	40.757	0	15.887	1024400000	13	27	0.12202	NaN	-0.403449	3	0.525469	3.52547	0.793789	0.846154	1.63994	HC	misc.GDSL-motif lipase	GDSL-motif lipase/hydrolase family protein | chr2:1259199-1262552 FORWARD	PF00657	26	26.28	extracellular	EX	X	n.a	n.a	n.a	0	0	0	0
AT1G72970.2;AT1G72970.1	AT1G72970	8	7	7	20.3	18.9	18.9	62.209	0	31.149	454560000	29	15	-0.341085	NaN	-0.843346	3	0.502261	3.50226	0.791855	0.846154	1.63801	HC	misc.nitrilases, *nitrile lyases, berberine bridge enzymes, reticuline oxidases, troponine reductases	Symbols: HTH, EDA17 | HTH (HOTHEAD); FAD binding / aldehyde-lyase/ mandelonitrile lyase | chr1:27452766-27455964 FORWARD	PF00732,PF05199	26	26.8	extracellular	EX	X	n.a	n.a	n.a	0	0	0	0
AT4G12390.1	AT4G12390	4	4	4	18.4	18.4	18.4	23.078	0	7.9016	79208000	10	5	-0.0625812	NaN	-0.562606	3	0.500025	3.50002	0.791669	0.846154	1.63782	HC	misc.invertase/pectin methylesterase inhibitor family protein	Symbols: PME1 | PME1 (PECTIN METHYLESTERASE INHIBITOR 1); enzyme inhibitor/ pectinesterase/ pectinesterase inhibitor | chr4:7336497-7337356 FORWARD	PF04043	26	26.18	extracellular	EX	X	n.a	n.a	n.a	0	0	0	0
AT3G59770.1;AT3G59770.3;AT3G59770.2;AT3G59770.4	AT3G59770	2	2	2	1.6	1.6	1.6	180.06	0.0013331	2.7924	23796000	85	3	-1.797	NaN	-2.2963	3	0.499295	3.49929	0.791608	0.846154	1.63776	HC	signalling.phosphinositides	Symbols: SAC9 | SAC9; inositol or phosphatidylinositol phosphatase | chr3:22079033-22086149 REVERSE	PF02383,PF00397	30	30.4	golgi,mitochondrion,plasma membrane	G,M,PM	X	n.a	n.a	n.a	0	0	0	0
AT4G08850.2;AT4G08850.1	AT4G08850	3	3	3	4.1	4.1	4.1	112.11	0	13.479	100340000	45	3	-1.2597	NaN	-1.72929	3	0.469593	3.46959	0.789133	0.846154	1.63529	HC	signalling.receptor kinases.leucine rich repeat XI	kinase | chr4:5636489-5640636 REVERSE	PF00069,PF00560,PF08263,PF13855,PF13855	30	30.2	plasma membrane	PM	X	n.a	n.a	n.a	0	0	0	0
AT1G76040.3;AT1G76040.2;AT1G76040.4;AT1G76040.1	AT1G76040	14	14	14	39.5	39.5	39.5	57.578	0	161.66	1102700000	25	36	-0.173	NaN	-0.630038	3	0.457038	3.45704	0.788086	0.846154	1.63424	HC	signalling.calcium.calcium dependent protein kinases	Symbols: CPK29 | CPK29; ATP binding / calcium ion binding / calmodulin-dependent protein kinase/ kinase/ protein kinase/ protein serine/threonine kinase/ protein tyrosine kinase | chr1:28537673-28540637 FORWARD	PF00069,PF13499,PF13499	30	30.3.1	cytosol,plasma membrane	C,PM	X	n.a	n.a	n.a	0	0	0	0
AT5G52320.2;AT5G52320.1	AT5G52320	3	3	3	7.4	7.4	7.4	56.785	0	5.5242	71316000	27	4	-0.878615	NaN	-1.3274	3	0.448784	3.44878	0.787399	0.846154	1.63355	HC	misc.cytochrome P450	Symbols: CYP96A4 | CYP96A4; electron carrier/ heme binding / iron ion binding / monooxygenase/ oxygen binding | chr5:21244978-21246682 REVERSE	PF00067	26	26.10	endoplasmic reticulum	ER	X	n.a	n.a	n.a	0	0	0	0
AT3G11700.1	AT3G11700	7	4	3	21.2	13.4	10.4	50.791	0	40.434	1467200000	18	34	0.0145387	NaN	-0.430823	3	0.445361	3.44536	0.787113	0.846154	1.63327	HC	cell wall.cell wall proteins.AGPs.AGP	Symbols: FLA18 | FLA18 (FASCICLIN-LIKE ARABINOGALACTAN PROTEIN 18 PRECURSOR) | chr3:3698839-3701493 FORWARD	PF02469,PF02469	10	10.5	extracellular	EX	X	n.a	n.a	n.a	0	0	0	0
AT4G18780.1	AT4G18780	4	4	4	5.9	5.9	5.9	111.52	0	11.291	184020000	45	9	-0.642221	NaN	-1.06676	3	0.424543	3.42454	0.785379	0.846154	1.63153	HC	cell wall.cellulose synthesis.cellulose synthase	Symbols: CESA8, IRX1, ATCESA8, LEW2 | IRX1 (IRREGULAR XYLEM 1); cellulose synthase/ transferase, transferring glycosyl groups | chr4:10312624-10316790 REVERSE	PF03552,PF14569	10	10.2	extracellular,plasma membrane	EX,PM	X	n.a	n.a	n.a	0	0	0	0
AT5G47520.1;AT3G07410.1	AT5G47520	3	2	2	14.5	10.9	10.9	24.444	0.00020218	3.8109	218680000	16	12	-0.501724	NaN	-0.857097	3	0.355373	3.35537	0.779614	0.846154	1.62577	HC	signalling.G-proteins	Symbols: AtRABA5a | AtRABA5a (Arabidopsis Rab GTPase homolog A5a); GTP binding | chr5:19277361-19279736 REVERSE	PF00071	30	30.5	plasma membrane	PM	X	n.a	n.a	n.a	0	0	0	0
AT5G65730.1	AT5G65730	3	2	2	16.8	14	14	33.692	0	10.718	109620000	13	5	-0.117406	NaN	-0.472279	3	0.354873	3.35487	0.779573	0.846154	1.62573	HC	cell wall.modification	xyloglucan:xyloglucosyl transferase, putative / xyloglucan endotransglycosylase, putative / endo-xyloglucan transferase, putative | chr5:26299032-26300478 FORWARD	PF00722,PF06955	10	10.7	extracellular	EX	X	n.a	n.a	n.a	0	0	0	0
AT3G26290.1;AT3G26290.2	AT3G26290	4	4	4	11	11	11	57.08	0	10.594	153520000	29	9	-0.95271	NaN	-1.29422	3	0.341515	3.34152	0.77846	0.846154	1.62461	HC	misc.cytochrome P450	Symbols: CYP71B26 | CYP71B26; electron carrier/ heme binding / iron ion binding / monooxygenase/ oxygen binding | chr3:9632682-9634470 REVERSE	PF00067	26	26.10	plasma membrane	PM	X	n.a	n.a	n.a	0	0	0	0
AT1G56330.1	AT1G56330	11	3	3	62.2	18.1	18.1	21.986	0	119.56	408970000	13	27	-0.272744	NaN	-0.605431	3	0.332686	3.33269	0.777724	0.846154	1.62388	HC	signalling.G-proteins	Symbols: SAR1, ATSAR1, ATSARA1B, ATSAR1B | ATSAR1B (SECRETION-ASSOCIATED RAS 1 B); GTP binding | chr1:21086555-21088549 REVERSE	PF00025	30	30.5	cytosol,endoplasmic reticulum	C,P	X	n.a	n.a	n.a	0	0	0	0
AT1G13090.2	AT1G13090	7	7	3	18.2	18.2	9	56.536	0	47.649	461440000	32	20	-0.730547	NaN	-1.06004	3	0.329493	3.32949	0.777458	0.846154	1.62361	HC	misc.cytochrome P450	Symbols: CYP71B28 | CYP71B28; electron carrier/ heme binding / iron ion binding / monooxygenase/ oxygen binding | chr1:4461806-4463543 FORWARD	PF00067	26	26.10	plasma membrane	PM	X	n.a	n.a	n.a	0	0	0	0
AT3G57510.1	AT3G57510	2	2	2	5.3	5.3	5.3	46.572	0.0002019	3.7837	53161000	20	1	-0.484232	NaN	-0.803016	3	0.318784	3.31878	0.776565	0.846154	1.62272	HC	cell wall.degradation.pectate lyases and polygalacturonases	Symbols: ADPG1 | ADPG1; polygalacturonase | chr3:21283338-21285941 REVERSE	PF00295	10	10.6	extracellular	EX	X	n.a	n.a	n.a	0	0	0	0
AT1G20190.2;AT1G20190.1	AT1G20190	3	3	3	20.2	20.2	20.2	21.011	0	32.076	674110000	8	20	0.512938	NaN	0.250458	3	0.262481	3.26248	0.771873	0.846154	1.61803	HC	cell wall.modification	Symbols: ATEXPA11, EXP11, ATEXP11, ATHEXP ALPHA 1.14 | ATEXPA11 (ARABIDOPSIS THALIANA EXPANSIN 11) | chr1:6998489-6999817 REVERSE	PF01357,PF03330	10	10.7	extracellular	EX	X	n.a	n.a	n.a	0	0	0	0
AT4G37330.1	AT4G37330	4	4	4	13.2	13.2	13.2	55.622	0	17.516	107300000	26	10	-1.03136	NaN	-1.29214	3	0.260776	3.26078	0.771731	0.846154	1.61789	HC	misc.cytochrome P450	Symbols: CYP81D4 | CYP81D4; electron carrier/ heme binding / iron ion binding / monooxygenase/ oxygen binding | chr4:17562345-17564596 REVERSE	PF00067	26	26.10	endoplasmic reticulum	ER	X	n.a	n.a	n.a	0	0	0	0
AT2G26730.1	AT2G26730	9	9	9	21.7	21.7	21.7	71.751	0	134	1154600000	35	45	-0.573991	NaN	-0.827091	3	0.2531	3.2531	0.771092	0.846154	1.61725	HC	signalling.receptor kinases.leucine rich repeat III	leucine-rich repeat transmembrane protein kinase, putative | chr2:11388407-11391641 FORWARD	PF00069,PF08263,PF13855	30	30.2	plasma membrane	PM	X	n.a	n.a	n.a	0	0	0	0
AT1G02950.3;AT1G02950.1;AT1G02950.2;AT1G02950.5;AT1G02950.4	AT1G02950	9	9	8	44.4	44.4	41.2	28.531	0	28.03	668700000	16	19	-0.271488	NaN	-0.514824	3	0.243336	3.24334	0.770278	0.846154	1.61643	HC	misc.glutathione S transferases	Symbols: ATGSTF4, GST31 | ATGSTF4 (GLUTATHIONE S-TRANSFERASE F4); glutathione transferase | chr1:665168-666452 REVERSE	PF00043,PF02798	26	26.9	nucleus,cytosol,plastid,plasma membrane	N,C,P,PM	X	n.a	n.a	n.a	0	0	0	0
AT1G21630.3;AT1G21630.1;AT1G21630.4;AT1G21630.2	AT1G21630	10	10	9	13	13	12.5	129.45	0	57.98	668750000	62	37	-0.951512	NaN	-1.18886	3	0.237346	3.23735	0.769779	0.846154	1.61593	HC	signalling.calcium	calcium-binding EF hand family protein | chr1:7581152-7588151 FORWARD	PF12763,PF13202	30	30.3	plasma membrane,nucleus	PM,N	X	n.a	n.a	n.a	0	0	0	0
AT1G70520.1	AT1G70520	1	1	1	2.2	2.2	2.2	72	0	10.007	66338000	33	5	-0.964545	-1.20019	NaN	0.235642	3	3.23564	0.769637	0.846154	1.61579	HC	signalling.receptor kinases.DUF 26	protein kinase family protein | chr1:26584729-26587419 REVERSE	PF01657,PF01657,PF00069	30	30.2	plasma membrane	PM	Likely PD protein	n.a	n.a	n.a	0	0	0	0
AT1G04520.1	AT1G04520	2	2	2	12.4	12.4	12.4	32.764	0	75.016	53214000	12	5	-0.440987	NaN	NaN	3	3	6	1	0.615385	1.61538	HC	not assigned.unknown	Symbols: PDLP2 | PDLP2 (PLASMODESMATA-LOCATED PROTEIN 2) | chr1:1231578-1234032 FORWARD	PF01657,PF01657	35	35	extracellular	EX	Likely PD protein	PDLP2	n.a	n.a	0	0	0	0
AT1G11310.2;AT1G11310.3;AT1G11310.1	AT1G11310	1	1	1	2.9	2.9	2.9	48.139	0.00019912	3.5329	32904000	17	5	-0.735427	NaN	NaN	3	3	6	1	0.615385	1.61538	HC	stress.biotic.signalling.MLO-like	Symbols: MLO2, ATMLO2, PMR2 | MLO2 (MILDEW RESISTANCE LOCUS O 2); calmodulin binding | chr1:3800738-3804185 REVERSE	PF03094	20	20.1	plasma membrane	PM	X	n.a	n.a	n.a	0	0	0	0
AT1G14730.1	AT1G14730	3	3	3	16.5	16.5	16.5	24.781	0	24.386	308410000	10	23	-0.0041693	NaN	NaN	3	3	6	1	0.615385	1.61538	HC	redox.ascorbate and glutathione	LOCATED IN: endomembrane system, integral to membrane; EXPRESSED IN: 16 plant structures; EXPRESSED DURING: 7 growth stages; CONTAINS InterPro DOMAIN/s: Cytochrome b561, eukaryote (InterPro:IPR004877), Cytochrome b561/ferric reductase transmembrane (InterPro:IPR006593); BEST Arabidopsis thaliana protein match is: ACYB-1; carbon-monoxide oxygenase (TAIR:AT5G38630.1); Has 447 Blast hits to 446 prot…	PF03188	21	21.2	plasma membrane	PM	X	n.a	n.a	n.a	0	0	0	0
AT1G16900.1	AT1G16900	1	1	1	1.8	1.8	1.8	65.083	0.0022514	2.5821	46349000	24	1	-0.644943	NaN	NaN	3	3	6	1	0.615385	1.61538	HC	protein.postranslational modification	sugar binding / transferase, transferring glycosyl groups | chr1:5779021-5782433 REVERSE	PF03901	29	29.4	endoplasmic reticulum	ER	X	n.a	n.a	n.a	0	0	0	0
AT1G20970.1	AT1G20970	4	4	4	5	5	5	150.16	0	24.017	54379000	54	9	-1.02721	NaN	NaN	3	3	6	1	0.615385	1.61538	HC	not assigned.no ontology	FUNCTIONS IN: molecular_function unknown; INVOLVED IN: biological_process unknown; LOCATED IN: plasma membrane, vacuole; EXPRESSED IN: guard cell, cultured cell; BEST Arabidopsis thaliana protein match is: PPI1 (PROTON PUMP INTERACTOR 1); protein binding (TAIR:AT4G27500.1); Has 53409 Blast hits to 33585 proteins in 1572 species: Archae - 464; Bacteria - 7066; Metazoa - 25076; Fungi - 5173; Plants…	#N/A	35	35	plasma membrane	PM	X	n.a	n.a	n.a	0	0	0	0
AT1G25520.1	AT1G25520	2	2	2	9.6	9.6	9.6	24.808	0.00020538	4.0408	16037000	10	4	-0.775725	NaN	NaN	3	3	6	1	0.615385	1.61538	HC	not assigned.unknown	unknown protein | chr1:8962125-8964564 FORWARD	PF01169,PF01169	35	35	endoplasmic reticulum	ER	X	n.a	n.a	n.a	0	0	0	0
AT1G32090.1	AT1G32090	4	4	4	5	5	5	93.132	0	5.4466	55347000	40	5	-1.13979	NaN	NaN	3	3	6	1	0.615385	1.61538	HC	stress.abiotic.drought/salt	early-responsive to dehydration protein-related / ERD protein-related | chr1:11540025-11544131 REVERSE	PF02714,PF13967,PF14703	20	20.2	plasma membrane	PM	X	n.a	n.a	n.a	0	0	0	0
AT1G34130.1	AT1G34130	3	3	3	3.8	3.8	3.8	82.979	0	4.2398	55176000	36	6	-1.08237	NaN	NaN	3	3	6	1	0.615385	1.61538	HC	stress.abiotic.drought/salt	Symbols: STT3B | STT3B (staurosporin and temperature sensitive 3-like b); oligosaccharyl transferase | chr1:12429890-12433187 FORWARD	PF02516	20	20.2	endoplasmic reticulum	ER	X	n.a	n.a	n.a	0	0	0	0
AT1G48840.1	AT1G48840	4	4	4	8.2	8.2	8.2	77.43	0	9.9452	60014000	30	3	-1.19566	NaN	NaN	3	3	6	1	0.615385	1.61538	HC	not assigned.unknown	unknown protein | chr1:18061521-18065031 FORWARD	PF04842	35	35	plasma membrane	PM	X	n.a	n.a	n.a	0	0	0	0
AT1G52100.4;AT1G52100.3;AT1G52100.5;AT1G52100.2;AT1G52100.1;AT5G35950.1;AT2G25980.1	AT1G52100	2	2	2	5.7	5.7	5.7	40.217	0.00152	2.7701	33541000	20	2	-0.821319	NaN	NaN	3	3	6	1	0.615385	1.61538	HC	hormone metabolism.jasmonate.induced-regulated-responsive-activated	jacalin lectin family protein | chr1:19383122-19385533 REVERSE	PF01419,PF01419,PF01419	17	17.7	plasma membrane,cytosol	PM,C	X	n.a	n.a	n.a	0	0	0	0
AT1G52320.1;AT1G52320.5;AT1G52320.2;AT1G52320.4;AT1G52320.3	AT1G52320	2	2	2	2.6	2.6	2.6	87.82	0.00019778	3.4055	189800000	34	7	-0.642385	NaN	NaN	3	3	6	1	0.615385	1.61538	HC	not assigned.unknown	unknown protein | chr1:19484355-19487433 FORWARD	PF04782,PF04783	35	35	plasma membrane,nucleus	PM,N	X	n.a	n.a	n.a	0	0	0	0
AT1G55910.1	AT1G55910	1	1	1	3.7	3.7	3.7	35.461	0.002798	2.5009	14700000	6	2	-0.276158	NaN	NaN	3	3	6	1	0.615385	1.61538	HC	transport.metal	Symbols: ZIP11 | ZIP11 (ZINC TRANSPORTER 11 PRECURSOR); cation transmembrane transporter/ metal ion transmembrane transporter | chr1:20906134-20907413 FORWARD	PF02535,PF02535	34	34.12	plasma membrane	PM	X	n.a	n.a	n.a	0	0	0	0
AT1G62000.1	AT1G62000	2	2	2	27	27	27	14.872	0	19.301	22564000	6	9	0.73284	NaN	NaN	3	3	6	1	0.615385	1.61538	HC	not assigned.unknown	unknown protein | chr1:22913441-22914146 FORWARD	#N/A	35	35	extracellular	EX	X	n.a	n.a	n.a	0	0	0	0
AT1G62060.1	AT1G62060	2	2	2	26.7	26.7	26.7	14.969	0	9.3579	16542000	6	8	0.453647	NaN	NaN	3	3	6	1	0.615385	1.61538	HC	not assigned.unknown	unknown protein | chr1:22941569-22942300 REVERSE	#N/A	35	35	extracellular	EX	X	n.a	n.a	n.a	0	0	0	0
AT1G62080.1	AT1G62080	3	3	3	27.3	27.3	27.3	15.113	0	68.596	45312000	6	14	0.957258	NaN	NaN	3	3	6	1	0.615385	1.61538	HC	not assigned.unknown	unknown protein | chr1:22946242-22946949 REVERSE	#N/A	35	35	extracellular	EX	X	n.a	n.a	n.a	0	0	0	0
AT1G64500.1	AT1G64500	4	4	4	19.8	19.8	19.8	41.016	0	21.704	85005000	23	12	-0.603873	NaN	NaN	3	3	6	1	0.615385	1.61538	HC	redox.glutaredoxins	glutaredoxin family protein | chr1:23953233-23954492 FORWARD	PF00462	21	21.4	plasma membrane	PM	X	n.a	n.a	n.a	0	0	0	0
AT1G69700.1	AT1G69700	2	2	2	19.6	19.6	19.6	22.033	0	26.45	26296000	9	5	-0.509059	NaN	NaN	3	3	6	1	0.615385	1.61538	HC	hormone metabolism.abscisic acid.induced-regulated-responsive-activated	Symbols: ATHVA22C | ATHVA22C | chr1:26220238-26221825 FORWARD	PF03134	17	17.1	extracellular	EX	X	n.a	n.a	n.a	0	0	0	0
AT1G74720.1	AT1G74720	5	5	5	9	9	9	121.41	0	18.975	123410000	48	10	-1.01776	NaN	NaN	3	3	6	1	0.615385	1.61538	HC	not assigned.no ontology.C2 domain-containing protein	C2 domain-containing protein | chr1:28075074-28078830 FORWARD	PF08372,PF00168,PF00168,PF00168,PF00168	35	35	plasma membrane	PM	Likely PD protein	MCTP15	n.a	n.a	0	0	0	0
AT2G34190.1	AT2G34190	3	3	2	9.2	9.2	6.7	57.613	0	19.029	106430000	15	10	-0.563235	NaN	NaN	3	3	6	1	0.615385	1.61538	HC	transport.misc	xanthine/uracil permease family protein | chr2:14436809-14439516 FORWARD	PF00860	34	34.99	plasma membrane	PM	Likely PD protein	n.a	n.a	n.a	0	0	0	0
AT2G38290.1	AT2G38290	1	1	1	2.3	2.3	2.3	50.768	0.0040605	2.3481	32034000	10	5	-0.2955	NaN	NaN	3	3	6	1	0.615385	1.61538	HC	transport.ammonium	Symbols: ATAMT2, AMT2;1 | ATAMT2 (AMMONIUM TRANSPORTER 2); ammonium transmembrane transporter/ high affinity secondary active ammonium transmembrane transporter | chr2:16039475-16042383 REVERSE	PF00909	34	34.5	plasma membrane	PM	X	n.a	n.a	n.a	0	0	0	0
AT2G38960.1;AT2G38960.3;AT2G38960.2	AT2G38960	2	2	2	4.7	4.7	4.7	53.448	0	7.2679	220710000	23	8	0.00635848	NaN	NaN	3	3	6	1	0.615385	1.61538	HC	protein.targeting.secretory pathway.ER	Symbols: AERO2 | AERO2 (Arabidopsis endoplasmic reticulum oxidoreductins 2); FAD binding / electron carrier/ oxidoreductase, acting on sulfur group of donors, disulfide as acceptor / protein binding | chr2:16265455-16267792 FORWARD	PF04137	29	29.3.4	endoplasmic reticulum	ER	X	n.a	n.a	n.a	0	0	0	0
AT2G39480.1;AT2G39480.2	AT2G39480	8	2	2	8.3	2.3	2.3	155.87	0.00019849	3.485	17484000	61	3	-1.79254	NaN	NaN	3	3	6	1	0.615385	1.61538	HC	transport.ABC transporters and multidrug resistance systems	Symbols: PGP6 | PGP6 (P-GLYCOPROTEIN 6); ATPase, coupled to transmembrane movement of substances | chr2:16477792-16485039 REVERSE	PF00005,PF00005,PF00664,PF00664	34	34.16	plasma membrane	PM	X	n.a	n.a	n.a	0	0	0	0
AT2G41300.1	AT2G41300	4	4	4	10.9	10.9	10.9	44.391	0	7.1309	166200000	22	6	-0.279857	NaN	NaN	3	3	6	1	0.615385	1.61538	HC	secondary metabolism.N misc.alkaloid-like	strictosidine synthase | chr2:17214237-17216292 REVERSE	PF03088	16	16.4	extracellular	EX	X	n.a	n.a	n.a	0	0	0	0
AT2G42010.1;AT2G42010.2	AT2G42010	6	6	6	9.8	9.8	9.8	121.1	0	60.417	172910000	49	14	-0.793362	NaN	NaN	3	3	6	1	0.615385	1.61538	HC	lipid metabolism.lipid degradation.lysophospholipases.phospholipase D	Symbols: PLDBETA1, PLDBETA | PLDBETA1 (PHOSPHOLIPASE D BETA 1); phospholipase D | chr2:17532813-17538400 REVERSE	PF00168,PF00614,PF00614,PF12357	11	11.9	plasma membrane	PM	X	n.a	n.a	n.a	0	0	0	0
AT2G42570.1	AT2G42570	3	3	3	7.4	7.4	7.4	43.165	0.00020606	4.0979	123540000	17	5	-0.359151	NaN	NaN	3	3	6	1	0.615385	1.61538	HC	not assigned.unknown	unknown protein | chr2:17717367-17720080 REVERSE	PF13839,PF14416	35	35	extracellular	EX	X	n.a	n.a	n.a	0	0	0	0
AT2G46170.1;AT2G46170.2	AT2G46170	4	4	3	18.4	18.4	14.1	28.687	0	14.048	568820000	10	17	0.440548	NaN	NaN	3	3	6	1	0.615385	1.61538	HC	not assigned.no ontology	reticulon family protein (RTNLB5) | chr2:18965313-18967213 FORWARD	PF02453	35	35	plasma membrane	PM	X	n.a	n.a	n.a	0	0	0	0
AT3G04640.2;AT3G04640.1	AT3G04640	1	1	1	6.3	6.3	6.3	15.888	0.0068039	2.0276	187930000	11	3	-0.0505327	NaN	NaN	3	3	6	1	0.615385	1.61538	HC	not assigned.no ontology.glycine rich proteins	glycine-rich protein | chr3:1260906-1261683 REVERSE	#N/A	35	35	extracellular	EX	X	n.a	n.a	n.a	0	0	0	0
AT3G05370.1	AT3G05370	1	1	1	1.3	1.3	1.3	96.867	0.0058245	2.1943	454090000	35	5	0.0755747	NaN	NaN	3	3	6	1	0.615385	1.61538	HC	stress.biotic.PR-proteins	Symbols: AtRLP31 | AtRLP31 (Receptor Like Protein 31); kinase/ protein binding | chr3:1536014-1538719 REVERSE	PF00560,PF00560,PF08263,PF13855	20	20.1	extracellular	EX	X	n.a	n.a	n.a	0	0	0	0
AT3G05930.1	AT3G05930	4	4	4	32.9	32.9	32.9	23.032	0	16.017	71374000	8	10	0.120681	NaN	NaN	3	3	6	1	0.615385	1.61538	HC	stress.abiotic.unspecified	Symbols: GLP8 | GLP8 (GERMIN-LIKE PROTEIN 8); manganese ion binding / nutrient reservoir | chr3:1770337-1771409 FORWARD	PF00190	20	20.2	extracellular	EX	X	n.a	n.a	n.a	0	0	0	0
AT3G10730.1	AT3G10730	2	2	2	4.6	4.6	4.6	49.94	0.00020593	4.0866	36469000	23	4	-0.483349	NaN	NaN	3	3	6	1	0.615385	1.61538	HC	not assigned.no ontology	sad1/unc-84-like 2 family protein | chr3:3358328-3360682 REVERSE	PF07738	35	35	endoplasmic reticulum,nucleus	ER,N	X	n.a	n.a	n.a	0	0	0	0
AT3G11320.1;AT5G05820.1;AT5G04160.1	AT3G11320	1	1	1	4.5	4.5	4.5	33.835	0.00020496	3.9955	43624000	13	3	-0.51188	NaN	NaN	3	3	6	1	0.615385	1.61538	HC	transport.metabolite transporters at the envelope membrane	organic anion transmembrane transporter | chr3:3546646-3548856 REVERSE	PF03151	34	34.8	endoplasmic reticulum	ER	X	n.a	n.a	n.a	0	0	0	0
AT3G11650.1	AT3G11650	2	2	2	10	10	10	26.765	0	4.8692	81791000	10	2	0.0749487	NaN	NaN	3	3	6	1	0.615385	1.61538	HC	stress.biotic	Symbols: NHL2 | NHL2 | chr3:3676146-3677037 REVERSE	PF03168	20	20.1	extracellular	EX	X	n.a	n.a	n.a	0	0	0	0
AT3G16920.1;AT3G16920.2	AT3G16920	2	2	2	9.6	9.6	9.6	36.699	0	12.361	22881000	12	8	-0.407621	NaN	NaN	3	3	6	1	0.615385	1.61538	HC	stress.biotic	chitinase | chr3:5776486-5777889 REVERSE	PF00182	20	20.1	plasma membrane	PM	X	n.a	n.a	n.a	0	0	0	0
AT3G21670.1	AT3G21670	2	2	2	5.4	5.4	5.4	65.245	0	7.7394	25703000	26	5	-1.05184	NaN	NaN	3	3	6	1	0.615385	1.61538	HC	transport.nitrate	nitrate transporter (NTP3) | chr3:7626757-7629151 REVERSE	PF00854	34	34.4	plasma membrane	PM	X	n.a	n.a	n.a	0	0	0	0
AT3G25700.1;AT3G25700.2	AT3G25700	4	4	4	13.1	13.1	13.1	49.373	0	18.705	206100000	20	11	-0.15363	NaN	NaN	3	3	6	1	0.615385	1.61538	HC	RNA.regulation of transcription.unclassified	chloroplast nucleoid DNA-binding protein-related | chr3:9358719-9360463 FORWARD	PF14541,PF14543	27	27.3	extracellular	EX	X	n.a	n.a	n.a	0	0	0	0
AT3G26700.5;AT3G26700.4;AT3G26700.3;AT3G26700.2;AT3G26700.1	AT3G26700	7	7	7	19	19	19	35.378	0	18.71	299620000	15	12	-0.223605	NaN	NaN	3	3	6	1	0.615385	1.61538	HC	signalling.kinase.RLCK.receptor like cytoplasmatic kinase I	protein kinase family protein | chr3:9809950-9812664 FORWARD	PF07714	30	30.30.2	plasma membrane	PM	X	n.a	n.a	n.a	0	0	0	0
AT3G26960.1	AT3G26960	2	2	2	11.5	11.5	11.5	19.279	0	5.0172	112640000	10	5	0.101447	NaN	NaN	3	3	6	1	0.615385	1.61538	HC	not assigned.unknown	unknown protein | chr3:9944668-9945579 REVERSE	PF01190	35	35	extracellular	EX	X	n.a	n.a	n.a	0	0	0	0
AT3G47960.1	AT3G47960	3	3	3	6	6	6	71.039	0	4.7189	65564000	24	5	-0.84566	NaN	NaN	3	3	6	1	0.615385	1.61538	HC	transport.peptides and oligopeptides	proton-dependent oligopeptide transport (POT) family protein | chr3:17697942-17700769 REVERSE	PF00854	34	34.13	plasma membrane	PM	X	n.a	n.a	n.a	0	0	0	0
AT3G51580.1;AT3G51580.2	AT3G51580	1	1	1	3.8	3.8	3.8	42.016	0.00057982	3.0548	36215000	22	1	-0.834973	NaN	NaN	3	3	6	1	0.615385	1.61538	HC	not assigned.unknown	unknown protein | chr3:19130834-19133342 REVERSE	#N/A	35	35	golgi,extracellular	G,EX	X	n.a	n.a	n.a	0	0	0	0
AT3G54140.2;AT3G54140.1	AT3G54140	2	2	2	5.4	5.4	5.4	64.033	0	7.4297	21115000	18	4	-0.931532	NaN	NaN	3	3	6	1	0.615385	1.61538	HC	transport.peptides and oligopeptides	Symbols: ATPTR1, PTR1 | PTR1 (PEPTIDE TRANSPORTER 1); dipeptide transporter/ transporter/ tripeptide transporter | chr3:20045663-20048572 REVERSE	PF00854	34	34.13	plasma membrane	PM	X	n.a	n.a	n.a	0	0	0	0
AT3G55320.1	AT3G55320	9	9	3	10.3	10.3	4.3	155.15	0	41.681	215210000	64	19	-0.912083	NaN	NaN	3	3	6	1	0.615385	1.61538	HC	transport.ABC transporters and multidrug resistance systems	Symbols: PGP20 | PGP20 (P-GLYCOPROTEIN 20); ATPase, coupled to transmembrane movement of substances | chr3:20506992-20513393 REVERSE	PF00005,PF00005,PF00664,PF00664	34	34.16	plasma membrane	PM	X	n.a	n.a	n.a	0	0	0	0
AT3G57880.4;AT3G57880.3;AT3G57880.2;AT3G57880.1	AT3G57880	23	8	8	32.7	13.5	13.5	89.192	0	45.386	1331600000	32	33	0.214269	NaN	NaN	3	3	6	1	0.615385	1.61538	HC	not assigned.no ontology.C2 domain-containing protein	C2 domain-containing protein | chr3:21430983-21434600 REVERSE	PF00168,PF00168,PF00168,PF08372	35	35	endoplasmic reticulum	ER	Likely PD protein	MCTP3	n.a	n.a	0	0	0	0
AT3G59040.1;AT3G59040.2	AT3G59040	3	3	3	7.5	7.5	7.5	66.161	0	24.036	145900000	34	13	-0.806685	NaN	NaN	3	3	6	1	0.615385	1.61538	HC	not assigned.no ontology.pentatricopeptide (PPR) repeat-containing protein	pentatricopeptide (PPR) repeat-containing protein | chr3:21821349-21824312 REVERSE	PF01535,PF01535,PF13041,PF13041,PF13812,PF13812	35	35	endoplasmic reticulum,plastid	ER,P	X	n.a	n.a	n.a	0	0	0	0
AT3G66658.2;AT3G66658.1	AT3G66658	2	2	2	4.5	4.5	4.5	66.002	0	5.4269	34869000	25	3	-1.12205	NaN	NaN	3	3	6	1	0.615385	1.61538	HC	secondary metabolism.N misc.betaine.betaine-aldehyde dehydrogenase	Symbols: ALDH22a1 | ALDH22a1 (Aldehyde Dehydrogenase 22a1); 3-chloroallyl aldehyde dehydrogenase/ oxidoreductase | chr3:2095105-2099151 REVERSE	PF00171	16	16.4	extracellular,endoplasmic reticulum	EX,ER	X	n.a	n.a	n.a	0	0	0	0
AT4G01410.1	AT4G01410	5	5	5	24.2	24.2	24.2	24.448	0	18.228	904580000	11	31	0.621233	NaN	NaN	3	3	6	1	0.615385	1.61538	HC	not assigned.no ontology	harpin-induced family protein / HIN1 family protein / harpin-responsive family protein | chr4:578165-579169 FORWARD	PF03168	35	35	plasma membrane	PM	X	n.a	n.a	n.a	0	0	0	0
AT4G14420.1	AT4G14420	1	1	1	5.7	5.7	5.7	17.427	0	4.3588	186380000	6	6	0.415912	NaN	NaN	3	3	6	1	0.615385	1.61538	HC	not assigned.no ontology	lesion inducing protein-related | chr4:8301946-8303915 REVERSE	PF05514	35	35	endoplasmic reticulum	ER	X	n.a	n.a	n.a	0	0	0	0
AT4G19040.1;AT4G19040.3;AT4G19040.2;AT5G45560.2;AT5G45560.1	AT4G19040	2	2	2	3.6	3.6	3.6	81.846	0	9.3461	60838000	37	4	-1.04247	NaN	NaN	3	3	6	1	0.615385	1.61538	HC	stress.biotic	Symbols: EDR2 | EDR2; lipid binding | chr4:10431520-10437425 REVERSE	PF07059,PF01852	20	20.1	plasma membrane,mitochondrion	PM,M	X	n.a	n.a	n.a	0	0	0	0
AT4G21180.2;AT4G21180.1	AT4G21180	4	4	4	9.3	9.3	9.3	65.732	0	31.337	148400000	30	8	-0.46314	NaN	NaN	3	3	6	1	0.615385	1.61538	HC	stress.abiotic.heat	Symbols: ATERDJ2B | ATERDJ2B; heat shock protein binding / unfolded protein binding | chr4:11288913-11292389 FORWARD	PF00226,PF02889	20	20.2	endoplasmic reticulum	ER	X	n.a	n.a	n.a	0	0	0	0
AT4G22330.1	AT4G22330	2	2	2	8.2	8.2	8.2	29.744	0.0051207	2.2483	57959000	5	3	0.244961	NaN	NaN	3	3	6	1	0.615385	1.61538	HC	lipid metabolism.'exotics' (steroids, squalene etc).sphingolipids	Symbols: ATCES1 | ATCES1; catalytic/ hydrolase, acting on carbon-nitrogen (but not peptide) bonds, in linear amides | chr4:11797567-11799856 FORWARD	PF05875	11	11.8	endoplasmic reticulum	ER	X	n.a	n.a	n.a	0	0	0	0
AT4G25960.1	AT4G25960	3	2	2	3	1.7	1.7	139.91	0.0038824	2.3674	16397000	57	3	-1.10016	NaN	NaN	3	3	6	1	0.615385	1.61538	HC	transport.ABC transporters and multidrug resistance systems	Symbols: PGP2 | PGP2 (P-GLYCOPROTEIN 2); ATPase, coupled to transmembrane movement of substances | chr4:13177409-13183631 FORWARD	PF00005,PF00005,PF00664,PF00664	34	34.16	plasma membrane	PM	X	n.a	n.a	n.a	0	0	0	0
AT4G26350.1	AT4G26350	1	1	1	3.2	3.2	3.2	49.655	0.0020723	2.633	3579900000	23	62	1.17116	NaN	NaN	3	3	6	1	0.615385	1.61538	HC	protein.degradation.ubiquitin.E3.SCF.FBOX	F-box family protein | chr4:13326853-13328315 FORWARD	PF00646,PF07723,PF08387	29	29.5.11.4	plasma membrane	PM	X	n.a	n.a	n.a	0	0	0	0
AT4G27780.2;AT4G27780.1	AT4G27780	3	1	1	13.3	5.3	5.3	28.356	0	12.319	43148000	15	2	-0.489812	NaN	NaN	3	3	6	1	0.615385	1.61538	HC	lipid metabolism.FA synthesis and FA elongation.acyl-CoA binding protein	Symbols: ACBP2 | ACBP2 (ACYL-COA BINDING PROTEIN ACBP 2); acyl-CoA binding / lead ion binding | chr4:13847549-13849887 FORWARD	PF00887,PF13857	11	11.1	endoplasmic reticulum	ER	X	n.a	n.a	n.a	0	0	0	0
AT4G30250.1;AT4G30250.2	AT4G30250	3	2	2	8.3	6	6	59.511	0	4.3503	37055000	23	2	-0.998887	NaN	NaN	3	3	6	1	0.615385	1.61538	HC	protein.degradation.AAA type	ATP binding / ATPase/ nucleoside-triphosphatase/ nucleotide binding | chr4:14811262-14812821 REVERSE	PF00004,PF14363	29	29.5.9	plasma membrane	PM	X	n.a	n.a	n.a	0	0	0	0
AT4G34640.1;AT4G34640.2	AT4G34640	3	3	3	9	9	9	47.141	0	5.7117	24553000	21	4	-0.848876	NaN	NaN	3	3	6	1	0.615385	1.61538	HC	lipid metabolism.'exotics' (steroids, squalene etc).squalene synthase	Symbols: SQS1, ERG9 | SQS1 (SQUALENE SYNTHASE 1); farnesyl-diphosphate farnesyltransferase | chr4:16538282-16541926 FORWARD	PF00494	11	11.8	endoplasmic reticulum	ER	X	n.a	n.a	n.a	0	0	0	0
AT4G39220.2;AT4G39220.1	AT4G39220	2	1	1	14.7	9.4	9.4	21.976	0	20.148	17540000	7	2	-0.567599	NaN	NaN	3	3	6	1	0.615385	1.61538	HC	protein.targeting.secretory pathway.ER	Symbols: ATRER1A | ATRER1A | chr4:18263617-18265771 FORWARD	PF03248	29	29.3.4	endoplasmic reticulum,golgi	ER,G	X	n.a	n.a	n.a	0	0	0	0
AT5G04890.1	AT5G04890	3	3	3	4.9	4.9	4.9	41.34	0	4.2453	48527000	15	3	-0.317285	NaN	NaN	3	3	6	1	0.615385	1.61538	HC	stress.abiotic.heat	Symbols: RTM2 | RTM2 (RESTRICTED TEV MOVEMENT 2) | chr5:1427173-1428454 FORWARD	PF00011	20	20.2	extracellular	EX	X	n.a	n.a	n.a	0	0	0	0
AT5G04990.1	AT5G04990	4	4	4	9.1	9.1	9.1	51.501	0	11.725	148630000	24	8	-0.211913	NaN	NaN	3	3	6	1	0.615385	1.61538	HC	not assigned.no ontology	sad1/unc-84 protein-related | chr5:1471481-1473964 REVERSE	PF07738	35	35	endoplasmic reticulum,nucleus	ER,N	X	n.a	n.a	n.a	0	0	0	0
AT5G10200.3;AT5G10200.2;AT5G10200.1	AT5G10200	2	2	2	5.4	5.4	5.4	71.252	0	6.7593	20933000	24	1	-1.20882	NaN	NaN	3	3	6	1	0.615385	1.61538	HC	not assigned.unknown	binding | chr5:3201518-3204709 FORWARD	#N/A	35	35	plasma membrane	PM	X	n.a	n.a	n.a	0	0	0	0
AT5G13000.2;AT5G13000.1	AT5G13000	6	5	5	4.5	3.8	3.8	221.53	0	14.17	143400000	92	10	-1.48058	NaN	NaN	3	3	6	1	0.615385	1.61538	HC	minor CHO metabolism.callose	Symbols: ATGSL12, gsl12 | ATGSL12 (glucan synthase-like 12); 1,3-beta-glucan synthase/ transferase, transferring glycosyl groups | chr5:4110295-4121427 REVERSE	PF02364,PF04652,PF14288	3	3.6	plasma membrane,mitochondrion	PM,M	Likely PD protein	n.a	n.a	n.a	0	0	0	0
AT5G15140.1	AT5G15140	3	3	3	4.9	4.9	4.9	54.519	0.0002002	3.6134	35804000	18	4	-0.294501	NaN	NaN	3	3	6	1	0.615385	1.61538	HC	minor CHO metabolism.others	aldose 1-epimerase family protein | chr5:4908686-4910799 FORWARD	PF01263	3	3.5	extracellular	EX	X	n.a	n.a	n.a	0	0	0	0
AT5G17010.2;AT5G17010.4;AT5G17010.3;AT5G17010.1;AT3G03090.1	AT5G17010	2	2	2	8.2	8.2	8.2	47.086	0	8.0875	44476000	16	4	-0.652088	NaN	NaN	3	3	6	1	0.615385	1.61538	HC	transport.sugars	sugar transporter family protein | chr5:5587351-5592446 REVERSE	PF00083	34	34.2	vacuole,plasma membrane	V,PM	X	n.a	n.a	n.a	0	0	0	0
AT5G17190.1;AT3G03160.1	AT5G17190	2	2	2	10.8	10.8	10.8	14.885	0.0038795	2.3577	247800000	5	2	0.81067	NaN	NaN	3	3	6	1	0.615385	1.61538	HC	not assigned.unknown	unknown protein | chr5:5652218-5652983 FORWARD	#N/A	35	35	plasma membrane	PM	X	n.a	n.a	n.a	0	0	0	0
AT5G19580.1	AT5G19580	2	2	2	4.4	4.4	4.4	64.996	0	4.7916	21074000	31	5	-0.969728	NaN	NaN	3	3	6	1	0.615385	1.61538	HC	Biodegradation of Xenobiotics	glyoxal oxidase-related | chr5:6607371-6609626 REVERSE	PF09118,PF07250	24	24	extracellular	EX	X	n.a	n.a	n.a	0	0	0	0
AT5G22460.3;AT5G22460.2;AT5G22460.1	AT5G22460	2	2	2	4.1	4.1	4.1	39.098	0.00020597	4.0868	37001000	15	3	-0.667059	NaN	NaN	3	3	6	1	0.615385	1.61538	HC	not assigned.no ontology	esterase/lipase/thioesterase family protein | chr5:7443508-7445546 REVERSE	PF12146	35	35	extracellular	EX	X	n.a	n.a	n.a	0	0	0	0
AT5G23390.1	AT5G23390	4	4	4	8.4	8.4	8.4	81.778	0	12.564	51477000	37	8	-0.978904	NaN	NaN	3	3	6	1	0.615385	1.61538	HC	not assigned.unknown	unknown protein | chr5:7870513-7874505 REVERSE	PF04842	35	35	plasma membrane	PM	X	n.a	n.a	n.a	0	0	0	0
AT5G23575.1	AT5G23575	2	2	2	4.4	4.4	4.4	68.608	0	4.3149	53173000	27	4	-0.752181	NaN	NaN	3	3	6	1	0.615385	1.61538	HC	not assigned.no ontology	transmembrane protein, putative | chr5:7946310-7950253 FORWARD	PF05602	35	35	endoplasmic reticulum	ER	X	n.a	n.a	n.a	0	0	0	0
AT5G24090.1	AT5G24090	2	2	2	14.9	14.9	14.9	33.096	0	5.0667	29602000	14	3	-0.790476	NaN	NaN	3	3	6	1	0.615385	1.61538	HC	stress.biotic.PR-proteins	acidic endochitinase (CHIB1) | chr5:8143699-8145252 REVERSE	PF00704	20	20.1	extracellular	EX	X	n.a	n.a	n.a	0	0	0	0
AT5G40170.1	AT5G40170	1	1	1	1.9	1.9	1.9	88.796	0.0042388	2.3336	1294600000	45	45	0.105663	NaN	NaN	3	3	6	1	0.615385	1.61538	HC	stress.biotic.PR-proteins	Symbols: AtRLP54 | AtRLP54 (Receptor Like Protein 54); kinase/ protein binding | chr5:16065091-16067574 REVERSE	PF00560,PF13516,PF13855,PF13855,PF13855	20	20.1	extracellular	EX	X	n.a	n.a	n.a	0	0	0	0
AT5G41050.1	AT5G41050	2	2	2	10.5	10.5	10.5	18.967	0.00020255	3.8535	90627000	11	5	0.460465	NaN	NaN	3	3	6	1	0.615385	1.61538	HC	not assigned.unknown	unknown protein | chr5:16433317-16434318 REVERSE	PF01190	35	35	extracellular	EX	X	n.a	n.a	n.a	0	0	0	0
AT5G49990.4;AT5G49990.3;AT5G49990.2;AT5G49990.1	AT5G49990	8	7	7	20.8	18.9	18.9	57.321	0	109.59	2306400000	15	40	0.97653	NaN	NaN	3	3	6	1	0.615385	1.61538	HC	transport.misc	xanthine/uracil permease family protein | chr5:20337641-20341881 REVERSE	PF00860	34	34.99	plasma membrane	PM	X	n.a	n.a	n.a	0	0	0	0
AT5G53470.1	AT5G53470	4	4	2	14.2	14.2	8	37.526	0	6.1472	55946000	19	4	-0.719368	NaN	NaN	3	3	6	1	0.615385	1.61538	HC	lipid metabolism.FA synthesis and FA elongation.acyl-CoA binding protein	Symbols: ACBP1, ACBP | ACBP1 (ACYL-COA BINDING PROTEIN 1); acyl-CoA binding / lead ion binding | chr5:21710351-21712611 FORWARD	PF00887,PF13857	11	11.1	plasma membrane	PM	X	n.a	n.a	n.a	0	0	0	0
AT5G53880.1	AT5G53880	1	1	1	16.7	16.7	16.7	7.7822	0.0059783	2.16	21623000	1	6	0.346035	NaN	NaN	3	3	6	1	0.615385	1.61538	HC	not assigned.unknown	unknown protein | chr5:21872794-21873303 REVERSE	#N/A	35	35	plasma membrane	PM	X	n.a	n.a	n.a	0	0	0	0
AT5G59010.2;AT5G59010.1	AT5G59010	4	2	2	12.8	5.8	5.8	40.132	0.0044012	2.281	30697000	20	2	-0.771416	NaN	NaN	3	3	6	1	0.615385	1.61538	HC	signalling.kinase.RLCK.brassinosteroid signalling kinase	protein kinase-related | chr5:23820368-23823265 REVERSE	PF07714	30	30.30.2.1	plasma membrane,cytosol	PM,C	Likely PD protein	n.a	n.a	n.a	0	0	0	0
AT5G59090.2;AT5G59090.3;AT5G59090.1	AT5G59090	5	5	4	8.8	8.8	7.8	77.514	0	40.856	161540000	38	12	-1.10966	NaN	NaN	3	3	6	1	0.615385	1.61538	HC	protein.degradation.subtilases	Symbols: ATSBT4.12 | ATSBT4.12; identical protein binding / serine-type endopeptidase | chr5:23851905-23855275 REVERSE	PF17766,PF05922,PF00082	29	29.5.1	extracellular	EX	X	n.a	n.a	n.a	0	0	0	0
AT5G23870.4;AT5G23870.1;AT5G23870.2;AT5G23870.3	AT5G23870	4	4	4	15.9	15.9	15.9	45.963	0	11.89	104800000	18	7	-0.814737	NaN	-1.02731	3	0.212571	3.21257	0.767714	0.846154	1.61387	HC	cell wall.pectin*esterases.acetyl esterase	pectinacetylesterase family protein | chr5:8046018-8050175 REVERSE	PF03283	10	10.8	extracellular,plasma membrane	EX,PM	X	n.a	n.a	n.a	0	0	0	0
AT1G54790.1;AT1G54790.3;AT1G54790.2	AT1G54790	2	2	2	5.8	5.8	5.8	42.408	0	14.626	60527000	17	9	-0.901174	NaN	-1.08521	3	0.184036	3.18404	0.765336	0.846154	1.61149	HC	misc.GDSL-motif lipase	GDSL-motif lipase/hydrolase family protein | chr1:20441055-20444029 REVERSE	PF00657	26	26.28	extracellular	EX	X	n.a	n.a	n.a	0	0	0	0
AT3G20100.1	AT3G20100	3	2	2	6.2	4.5	4.5	58.26	0.0020759	2.6541	86408000	27	2	-0.756921	NaN	-0.900303	3	0.143382	3.14338	0.761948	0.846154	1.6081	HC	misc.cytochrome P450	Symbols: CYP705A19 | CYP705A19; electron carrier/ heme binding / iron ion binding / monooxygenase/ oxygen binding | chr3:7018995-7020901 FORWARD	PF00067	26	26.10	plasma membrane	PM	X	n.a	n.a	n.a	0	0	0	0
AT1G55850.1	AT1G55850	2	2	2	3.8	3.8	3.8	82.346	0	6.751	97771000	36	4	-1.11198	NaN	-1.2498	3	0.137813	3.13781	0.761484	0.846154	1.60764	HC	cell wall.cellulose synthesis.cellulose synthase	Symbols: ATCSLE1, CSLE1 | ATCSLE1; cellulose synthase/ transferase, transferring glycosyl groups | chr1:20876699-20879482 FORWARD	PF03552,PF03552	10	10.2	endoplasmic reticulum,plasma membrane	ER,PM	X	n.a	n.a	n.a	0	0	0	0
AT3G45780.2;AT3G45780.1	AT3G45780	19	16	16	24.3	20.6	20.6	111.69	0	77.453	1248500000	54	40	-0.593649	NaN	-0.709407	3	0.115758	3.11576	0.759646	0.846154	1.6058	HC	signaling.kinase.cytoplasmatic kinase.AGC	Symbols: PHOT1, NPH1, JK224, RPT1 | PHOT1 (PHOTOTROPIN 1); FMN binding / blue light photoreceptor/ kinase/ protein binding / protein serine/threonine kinase | chr3:16816866-16824210 FORWARD	PF00069,PF13426,PF13426	30	30.30.1.1	plasma membrane,plastid	PM,P	Likely PD protein	n.a	n.a	n.a	0	0	0	0
AT2G17720.1	AT2G17720	4	4	4	22.3	22.3	22.3	32.691	0	6.2624	31000000	15	3	-0.650333	-0.752381	NaN	0.102048	3	3.10205	0.758504	0.846154	1.60466	HC	misc.oxidases - copper, flavone etc	oxidoreductase, 2OG-Fe(II) oxygenase family protein | chr2:7697336-7699568 FORWARD	PF13640	26	26.7	endoplasmic reticulum	ER	X	n.a	n.a	n.a	0	0	0	0
AT5G63140.1	AT5G63140	4	4	4	21.1	21.1	21.1	43.547	0	51.796	81532000	17	3	-0.510086	NaN	-0.599626	3	0.0895399	3.08954	0.757462	0.846154	1.60362	HC	misc.acid and other phosphatases	Symbols: ATPAP29, PAP29 | ATPAP29 (ARABIDOPSIS THALIANA PURPLE ACID PHOSPHATASE 29); acid phosphatase/ protein serine/threonine phosphatase | chr5:25328119-25329799 FORWARD	PF00149	26	26.13	extracellular	EX	X	n.a	n.a	n.a	0	0	0	0
AT5G49180.1	AT5G49180	8	8	8	19.1	19.1	19.1	62.798	0	20.504	322190000	30	17	-0.635767	NaN	-0.707914	3	0.0721464	3.07215	0.756012	0.846154	1.60217	HC	cell wall.pectin*esterases.PME	pectinesterase family protein | chr5:19940678-19943007 REVERSE	PF01095,PF04043	10	10.8	extracellular	EX	Likely PD protein	n.a	n.a	n.a	0	0	0	0
AT4G23990.1;AT4G23990.2;AT4G24000.1	AT4G23990	3	3	3	3.7	3.7	3.7	85.379	0	5.5985	61832000	37	6	-0.907387	-0.970763	NaN	0.0633761	3	3.06338	0.755281	0.846154	1.60144	HC	cell wall.cellulose synthesis.cellulose synthase	Symbols: ATCSLG3, CSLG3 | ATCSLG3; cellulose synthase/ transferase/ transferase, transferring glycosyl groups | chr4:12456489-12460753 FORWARD	PF03552,PF03552	10	10.2	plasma membrane	PM	X	n.a	n.a	n.a	0	0	0	0
AT3G14840.2	AT3G14840	8	8	7	10	10	8.8	112.28	0	26.718	413040000	52	16	-1.36082	NaN	-1.39248	3	0.0316538	3.03165	0.752638	0.846154	1.59879	HC	signalling.receptor kinases.DUF 26	leucine-rich repeat family protein / protein kinase family protein | chr3:4988107-4994058 FORWARD	PF00560,PF07714,PF11721	30	30.2	plasma membrane	PM	X	n.a	n.a	n.a	0	0	0	0
AT4G21960.1	AT4G21960	7	7	7	29.1	29.1	29.1	37.294	0	36.743	2084100000	14	33	0.16777	NaN	0.136714	3	0.0310564	3.03106	0.752588	0.846154	1.59874	HC	misc.peroxidases	Symbols: PRXR1 | PRXR1; electron carrier/ heme binding / peroxidase | chr4:11646174-11648462 REVERSE	PF00141	26	26.12	extracellular	EX	X	n.a	n.a	n.a	0	0	0	0
AT5G07340.1;AT5G07340.2	AT5G07340	12	4	4	26.3	14.5	14.5	60.489	0	29.772	485480000	27	14	-0.613308	NaN	-0.643025	3	0.0297172	3.02972	0.752476	0.846154	1.59863	HC	signalling.calcium	calnexin, putative | chr5:2317213-2319649 FORWARD	PF00262	30	30.3	endoplasmic reticulum	ER	Likely PD protein	n.a	n.a	n.a	0	0	0	0
AT2G18660.1	AT2G18660	1	1	1	8.5	8.5	8.5	14.518	0.0051123	2.2355	97432000	8	4	-0.49682	NaN	-0.519799	3	0.0229791	3.02298	0.751915	0.846154	1.59807	HC	cell wall.modification	Symbols: EXLB3 | EXLB3 (EXPANSIN-LIKE B3 PRECURSOR) | chr2:8090658-8091656 REVERSE	PF03330	10	10.7	extracellular	EX	X	n.a	n.a	n.a	0	0	0	0
AT1G05150.1	AT1G05150	9	9	5	14.4	14.4	7.1	90.168	0	28.034	283780000	43	20	-1.36893	NaN	-1.39155	3	0.022619	3.02262	0.751885	0.846154	1.59804	HC	signalling.calcium	calcium-binding EF hand family protein | chr1:1484067-1486960 REVERSE	PF13432,PF13432	30	30.3	plasma membrane	PM	X	n.a	n.a	n.a	0	0	0	0
AT5G20960.2;AT5G20960.1	AT5G20960	4	4	4	4.1	4.1	4.1	149.55	0	18.98	189770000	61	13	-1.49541	NaN	-1.509	3	0.0135921	3.01359	0.751133	0.846154	1.59729	HC	misc.misc2	Symbols: AAO1, AO1, ATAO, ATAO1 | AAO1 (ARABIDOPSIS ALDEHYDE OXIDASE 1); aldehyde oxidase/ indole-3-acetaldehyde oxidase | chr5:7116738-7122670 FORWARD	PF00111,PF00941,PF01315,PF01799,PF02738,PF03450	26	26.1	plasma membrane,cytosol	PM,C	X	n.a	n.a	n.a	0	0	0	0
AT5G45950.1	AT5G45950	2	2	2	7.3	7.3	7.3	39.854	0	6.6504	272860000	14	7	-0.262967	NaN	-0.265072	3	0.00210552	3.00211	0.750175	0.846154	1.59633	HC	misc.GDSL-motif lipase	GDSL-motif lipase/hydrolase family protein | chr5:18634079-18636699 FORWARD	PF00657	26	26.28	extracellular	EX	X	n.a	n.a	n.a	0	0	0	0
AT1G70690.1	AT1G70690	4	4	4	19.7	19.7	19.7	31.804	0	107.5	4035900000	11	49	1.33385	0.35886	-0.683627	0.974994	2.01748	2.99248	0.749373	0.846154	1.59553	HC	signalling.receptor kinases.misc	Symbols: HWI1, PDLP5 | HWI1 (HOPW1-1-INDUCED GENE1) | chr1:26652013-26653643 FORWARD	PF01657,PF01657	30	30.2	extracellular	EX	Likely PD protein	PDLP5	n.a	n.a	0	0	0	0
AT5G36220.2;AT5G36220.1	AT5G36220	5	5	5	15.4	15.4	15.4	40.037	0	47.779	401830000	20	15	-0.520277	NaN	-0.508293	3	-0.0119839	2.98802	0.749001	0.846154	1.59516	HC	misc.cytochrome P450	Symbols: CYP81D1, CYP91A1 | CYP81D1 (CYTOCHROME P450 81D1); electron carrier/ heme binding / iron ion binding / monooxygenase/ oxygen binding | chr5:14253690-14256033 REVERSE	PF00067	26	26.10	endoplasmic reticulum	ER	X	n.a	n.a	n.a	0	0	0	0
AT3G62560.1	AT3G62560	10	2	2	56	11.9	11.9	21.939	0	73.381	407300000	13	17	-0.32574	NaN	-0.304137	3	-0.021603	2.9784	0.7482	0.846154	1.59435	HC	signalling.G-proteins	GTP-binding protein, putative | chr3:23137426-23139045 FORWARD	PF00025	30	30.5	endoplasmic reticulum	ER	X	n.a	n.a	n.a	0	0	0	0
AT1G80170.1;AT1G80170.2	AT1G80170	9	9	9	22.3	22.3	22.3	48.171	0	37.18	3082000000	20	42	0.111362	NaN	0.141671	3	-0.0303084	2.96969	0.747474	0.846154	1.59363	HC	cell wall.degradation.pectate lyases and polygalacturonases	polygalacturonase, putative / pectinase, putative | chr1:30153408-30155713 REVERSE	PF00295	10	10.6	extracellular	EX	X	n.a	n.a	n.a	0	0	0	0
AT5G06390.1	AT5G06390	6	4	4	21	13.5	13.5	50.408	0	56.131	808090000	21	13	0.34519	0.386289	NaN	-0.0410991	3	2.9589	0.746575	0.846154	1.59273	HC	cell wall.cell wall proteins.AGPs.AGP	Symbols: FLA17 | FLA17 (FASCICLIN-LIKE ARABINOGALACTAN PROTEIN 17 PRECURSOR) | chr5:1952851-1955788 FORWARD	PF02469,PF02469	10	10.5	plasma membrane	PM	X	n.a	n.a	n.a	0	0	0	0
AT5G61900.3;AT5G61900.1;AT5G07300.1;AT5G61910.4	AT5G61900	1	1	1	1.6	1.6	1.6	63.119	0.0029723	2.44	92146000	29	8	-1.33831	NaN	-1.29516	3	-0.0431484	2.95685	0.746404	0.846154	1.59256	HC	signalling.calcium	Symbols: BON1, CPN1, BON | BON1 (BONZAI 1); calcium-dependent phospholipid binding | chr5:24855661-24859341 REVERSE	PF07002,PF00168,PF00168	30	30.3	plasma membrane,cytosol	PM,C	X	n.a	n.a	n.a	0	0	0	0
AT4G30210.2;AT4G30210.3;AT4G30210.1	AT4G30210	11	11	11	25.3	25.3	25.3	78.926	0	55.944	749280000	39	31	-0.861585	NaN	-0.815144	3	-0.0464407	2.95356	0.74613	0.846154	1.59228	HC	misc.cytochrome P450	Symbols: ATR2, AR2 | ATR2 (ARABIDOPSIS P450 REDUCTASE 2); NADPH-hemoprotein reductase | chr4:14796764-14800922 FORWARD	PF00258,PF00175,PF00667	26	26.10	endoplasmic reticulum	ER	X	n.a	n.a	n.a	0	0	0	0
AT4G00165.2;AT4G00165.1	AT4G00165	2	2	2	18.8	18.8	18.8	13.338	0	26.724	1172400000	7	16	0.770561	NaN	0.820128	3	-0.0495663	2.95043	0.745869	0.846154	1.59202	HC	misc.protease inhibitor/seed storage/lipid transfer protein (LTP) family protein	protease inhibitor/seed storage/lipid transfer protein (LTP) family protein | chr4:69273-69875 REVERSE	PF14547	26	26.21	extracellular	EX	X	n.a	n.a	n.a	0	0	0	0
AT3G22060.1	AT3G22060	6	6	6	31.3	31.3	31.3	27.863	0	57.031	351990000	15	13	-0.214918	NaN	-0.158113	3	-0.0568049	2.9432	0.745266	0.846154	1.59142	HC	signalling.receptor kinases.misc	receptor protein kinase-related | chr3:7771016-7772340 FORWARD	PF01657,PF01657	30	30.2	extracellular	EX	X	n.a	n.a	n.a	0	0	0	0
AT4G23180.3;AT4G23180.2;AT4G23180.1	AT4G23180	4	4	1	8	8	2.5	57.02	0	6.817	334810000	29	6	-0.626928	NaN	-0.548189	3	-0.0787395	2.92126	0.743438	0.846154	1.58959	HC	signalling.receptor kinases.DUF 26	Symbols: CRK10, RLK4 | CRK10 (CYSTEINE-RICH RLK10); ATP binding / kinase/ protein kinase/ protein serine/threonine kinase/ protein tyrosine kinase | chr4:12138137-12140921 FORWARD	PF01657,PF01657,PF07714	30	30.2	plasma membrane	PM	X	n.a	n.a	n.a	0	0	0	0
AT4G01130.1;AT4G01130.2;AT4G01130.3	AT4G01130	5	5	5	17.5	17.5	17.5	42.013	0	17.642	665740000	17	40	-0.635203	NaN	-0.553215	3	-0.0819876	2.91801	0.743168	0.846154	1.58932	HC	misc.acyl transferases	acetylesterase, putative | chr4:485833-488007 FORWARD	PF00657	26	26.5	extracellular	EX	Likely PD protein	n.a	n.a	n.a	0	0	0	0
AT1G30760.1;AT1G30760.2	AT1G30760	4	2	2	10.7	6	6	60.191	0	12.087	42809000	29	1	-1.45886	NaN	-1.3612	3	-0.0976639	2.90234	0.741861	0.846154	1.58802	HC	misc.nitrilases, *nitrile lyases, berberine bridge enzymes, reticuline oxidases, troponine reductases	FAD-binding domain-containing protein | chr1:10918278-10920677 FORWARD	PF01565,PF08031	26	26.8	extracellular	EX	X	n.a	n.a	n.a	0	0	0	0
AT3G45970.2;AT3G45970.1	AT3G45970	5	5	5	23.1	23.1	23.1	25.925	0	11.421	437620000	13	14	-0.167922	NaN	-0.0681865	3	-0.0997351	2.90026	0.741689	0.846154	1.58784	HC	cell wall.modification	Symbols: ATEXLA1, EXPL1, ATEXPL1, ATHEXP BETA 2.1 | ATEXLA1 (ARABIDOPSIS THALIANA EXPANSIN-LIKE A1) | chr3:16896166-16897308 FORWARD	PF01357,PF03330	10	10.7	extracellular	EX	X	n.a	n.a	n.a	0	0	0	0
AT1G67830.1	AT1G67830	3	3	3	14.8	14.8	14.8	40.461	0	22.322	219200000	16	14	-0.854219	NaN	-0.727067	3	-0.127153	2.87285	0.739404	0.846154	1.58556	HC	cell wall.degradation.mannan-xylose-arabinose-fucose	Symbols: ATFXG1 | ATFXG1 (alpha-fucosidase 1); alpha-L-fucosidase/ carboxylesterase | chr1:25431586-25432990 REVERSE	PF00657	10	10.6	extracellular	EX	X	n.a	n.a	n.a	0	0	0	0
AT5G26670.4;AT5G26670.3;AT5G26670.2;AT3G05910.2;AT3G05910.1;AT5G26670.1	AT5G26670	1	1	1	4	4	4	33.608	0.009049	1.9162	127460000	16	2	-0.863192	NaN	-0.734759	3	-0.128433	2.87157	0.739297	0.846154	1.58545	HC	cell wall.pectin*esterases.acetyl esterase	pectinacetylesterase, putative | chr5:9318282-9320987 FORWARD	PF03283	10	10.8	extracellular,cytosol	EX,C	X	n.a	n.a	n.a	0	0	0	0
AT1G65820.1;AT1G65820.3	AT1G65820	1	1	1	11	11	11	16.586	0	5.4957	172930000	8	7	-0.174423	NaN	-0.0452016	3	-0.129222	2.87078	0.739232	0.846154	1.58539	HC	misc.glutathione S transferases	microsomal glutathione s-transferase, putative | chr1:24485101-24486892 FORWARD	PF01124	26	26.9	endoplasmic reticulum,extracellular	ER,EX	X	n.a	n.a	n.a	0	0	0	0
AT3G27400.1;AT3G27400.2	AT3G27400	4	2	2	14.8	8	8	45.984	0	5.1127	44460000	20	2	-1.05557	NaN	-0.914072	3	-0.141493	2.85851	0.738209	0.846154	1.58436	HC	cell wall.degradation.pectate lyases and polygalacturonases	pectate lyase family protein | chr3:10140323-10143225 FORWARD	PF00544	10	10.6	extracellular	EX	X	n.a	n.a	n.a	0	0	0	0
AT5G04170.1	AT5G04170	3	3	3	9.9	9.9	9.9	37.112	0	27.858	444730000	8	11	0.0531639	NaN	0.201592	3	-0.148428	2.85157	0.737631	0.846154	1.58378	HC	signalling.calcium	calcium-binding EF hand family protein | chr5:1145431-1147781 FORWARD	PF13202,PF13202	30	30.3	plasma membrane	PM	X	n.a	n.a	n.a	0	0	0	0
AT1G20760.1	AT1G20760	7	6	6	9.8	9.1	9.1	109.82	0	22.471	167890000	54	12	-1.34648	NaN	-1.19368	3	-0.152805	2.8472	0.737266	0.846154	1.58342	HC	signalling.calcium	calcium-binding EF hand family protein | chr1:7209369-7214993 FORWARD	PF12763,PF13202	30	30.3	plasma membrane	PM	X	n.a	n.a	n.a	0	0	0	0
AT4G37430.1	AT4G37430	2	2	2	6.6	6.6	6.6	57.555	0	27.992	76478000	28	7	-1.12619	NaN	-0.969733	3	-0.156454	2.84355	0.736962	0.846154	1.58312	HC	misc.cytochrome P450	Symbols: CYP91A2, CYP81F1 | CYP91A2 (CYTOCHROME P450 MONOOXYGENASE 91A2); electron carrier/ heme binding / iron ion binding / monooxygenase/ oxygen binding | chr4:17597110-17598958 FORWARD	PF00067	26	26.10	endoplasmic reticulum	ER	X	n.a	n.a	n.a	0	0	0	0
AT1G16920.1	AT1G16920	9	6	3	48.1	34.7	18.1	24.02	0	13.29	367290000	12	14	-0.469946	NaN	-0.300468	3	-0.169478	2.83052	0.735877	0.846154	1.58203	HC	signalling.G-proteins	Symbols: RAB11, ATRABA1B | ATRABA1B (ARABIDOPSIS RAB GTPASE HOMOLOG A1B); GTP binding | chr1:5787330-5789249 REVERSE	PF00071	30	30.5	golgi,plasma membrane	G,PM	X	n.a	n.a	n.a	0	0	0	0
AT1G61820.1;AT1G61820.3	AT1G61820	6	6	6	15.1	15.1	15.1	59.112	0	25.571	195760000	26	11	-1.18401	NaN	-1.00366	3	-0.180347	2.81965	0.734971	0.846154	1.58112	HC	misc.gluco-, galacto- and mannosidases	Symbols: BGLU46 | BGLU46 (BETA GLUCOSIDASE 46); catalytic/ cation binding / hydrolase, hydrolyzing O-glycosyl compounds | chr1:22835078-22838615 FORWARD	PF00232	26	26.3	extracellular,vacuole	EX,V	X	n.a	n.a	n.a	0	0	0	0
AT4G18670.1	AT4G18670	12	7	7	16.7	11.4	11.4	90.835	0	93.628	4784100000	11	76	1.16617	0.000456375	-0.46799	1.16571	1.63416	2.79987	0.733323	0.846154	1.57948	HC	cell wall.cell wall proteins.LRR	protein binding / structural constituent of cell wall | chr4:10275462-10278491 REVERSE	PF08263,PF13855	10	10.5	extracellular	EX	X	n.a	n.a	n.a	0	0	0	0
AT1G51805.1;AT1G51805.2	AT1G51805	6	6	5	7.4	7.4	6.4	98.075	0	25.381	273130000	44	14	-1.25583	NaN	-1.04015	3	-0.215674	2.78433	0.732027	0.846154	1.57818	HC	signalling.receptor kinases.leucine rich repeat I	leucine-rich repeat protein kinase, putative | chr1:19220977-19225689 REVERSE	PF13855,PF12819,PF00069	30	30.2	plasma membrane	PM	X	n.a	n.a	n.a	0	0	0	0
AT5G12080.3;AT5G12080.2;AT5G12080.1	AT5G12080	4	4	4	9.7	9.7	9.7	83.031	0	6.6225	50925000	39	5	-1.5469	NaN	-1.32438	3	-0.222527	2.77747	0.731456	0.846154	1.57761	HC	signalling.unspecified	Symbols: MSL10 | MSL10 (MECHANOSENSITIVE CHANNEL OF SMALL CONDUCTANCE-LIKE 10); mechanically-gated ion channel | chr5:3898047-3901629 REVERSE	PF00924	30	30.99	endoplasmic reticulum,peroxisome	ER,PX	X	n.a	n.a	n.a	0	0	0	0
AT1G62810.1	AT1G62810	7	6	6	16.6	15	15	80.137	0	27.858	320810000	33	13	-1.44416	NaN	-1.18239	3	-0.261767	2.73823	0.728186	0.846154	1.57434	HC	misc.oxidases - copper, flavone etc	copper amine oxidase, putative | chr1:23257726-23261966 REVERSE	PF02728,PF02727,PF01179	26	26.7	extracellular	EX	X	n.a	n.a	n.a	0	0	0	0
AT1G53430.2;AT1G53430.1	AT1G53430	4	4	2	5.6	5.6	2.9	110.23	0	11.025	456530000	55	4	-1.43757	NaN	-1.16712	3	-0.270449	2.72955	0.727463	0.846154	1.57362	HC	signalling.receptor kinases.DUF 26	leucine-rich repeat family protein / protein kinase family protein | chr1:19935167-19941088 FORWARD	PF07714,PF11721,PF13855	30	30.2	plasma membrane,mitochondrion	PM,M	X	n.a	n.a	n.a	0	0	0	0
AT4G12880.2;AT4G12880.1	AT4G12880	7	7	7	46.6	46.6	46.6	12.01	0	12.631	1001000000	6	21	0.237393	NaN	0.525164	3	-0.287771	2.71223	0.726019	0.846154	1.57217	HC	misc.plastocyanin-like	plastocyanin-like domain-containing protein | chr4:7544381-7545327 REVERSE	PF02298	26	26.19	extracellular,mitochondrion	EX,M	X	n.a	n.a	n.a	0	0	0	0
AT2G01820.1	AT2G01820	2	2	2	3.1	3.1	3.1	101.96	0.0064795	2.0936	103280000	42	2	-1.44751	NaN	-1.15671	3	-0.290798	2.7092	0.725767	0.846154	1.57192	HC	signalling.receptor kinases.leucine rich repeat IX	leucine-rich repeat protein kinase, putative | chr2:357431-360681 REVERSE	PF00069,PF08263,PF08263,PF13855	30	30.2	plasma membrane	PM	X	n.a	n.a	n.a	0	0	0	0
AT4G14940.1	AT4G14940	2	2	2	5.7	5.7	5.7	73.782	0	5.0486	109880000	29	5	-0.635087	-0.311061	NaN	-0.324025	3	2.67597	0.722998	0.846154	1.56915	HC	misc.oxidases - copper, flavone etc	Symbols: ATAO1 | ATAO1 (ARABIDOPSIS THALIANA AMINE OXIDASE 1); amine oxidase/ copper ion binding | chr4:8541879-8544566 FORWARD	PF01179,PF02727,PF02728	26	26.7	extracellular	EX	X	n.a	n.a	n.a	0	0	0	0
AT1G67490.2;AT1G67490.1	AT1G67490	4	4	4	8.3	8.3	8.3	88.122	0	10.595	132030000	45	7	-1.03725	NaN	-0.701322	3	-0.33593	2.66407	0.722006	0.846154	1.56816	HC	misc.gluco-, galacto- and mannosidases	Symbols: GCS1, KNF | GCS1 (GLUCOSIDASE 1); alpha-glucosidase | chr1:25280451-25286596 REVERSE	PF16923,PF03200	26	26.3	endoplasmic reticulum	ER	X	n.a	n.a	n.a	0	0	0	0
AT2G10940.2;AT2G10940.1	AT2G10940	6	6	6	26.8	26.8	26.8	29.648	0	50.176	19218000000	19	92	1.42766	NaN	1.76382	3	-0.336153	2.66385	0.721987	0.846154	1.56814	HC	misc.protease inhibitor/seed storage/lipid transfer protein (LTP) family protein	protease inhibitor/seed storage/lipid transfer protein (LTP) family protein | chr2:4310412-4312103 REVERSE	PF14547	26	26.21	vacuole,extracellular	V,EX	X	n.a	n.a	n.a	0	0	0	0
AT4G13340.1	AT4G13340	20	20	9	26.2	26.2	15.7	82.245	0	323.31	21757000000	15	227	1.5905	0.513327	0.0171577	1.07717	1.57334	2.65051	0.720875	0.846154	1.56703	HC	cell wall.cell wall proteins.LRR	leucine-rich repeat family protein / extensin family protein | chr4:7758610-7761057 FORWARD	PF08263	10	10.5	extracellular	EX	Likely PD protein	n.a	n.a	n.a	0	0	0	0
AT3G45190.1;AT3G45190.2	AT3G45190	16	16	14	27.9	27.9	25.6	87.639	0	42.811	661960000	43	35	-1.25831	NaN	-0.894407	3	-0.3639	2.6361	0.719675	0.846154	1.56583	HC	misc.acid and other phosphatases	SIT4 phosphatase-associated family protein | chr3:16541673-16548278 REVERSE	PF04499,PF04499	26	26.13	plasma membrane	PM	X	n.a	n.a	n.a	0	0	0	0
AT3G15800.1	AT3G15800	3	3	3	16	16	16	44.169	0	4.7927	51788000	19	2	-0.949689	-0.539252	NaN	-0.410437	3	2.58956	0.715797	0.846154	1.56195	HC	misc.beta 1,3 glucan hydrolases.glucan endo-1,3-beta-glucosidase	glycosyl hydrolase family 17 protein | chr3:5345051-5346988 FORWARD	PF00332	26	26.4	extracellular	EX	X	n.a	n.a	n.a	0	0	0	0
AT2G06850.1;AT2G06850.2	AT2G06850	22	22	22	59.5	59.5	59.5	34.291	0	176.48	33042000000	17	307	1.83167	1.56199	1.38018	0.269688	0.451498	0.721186	0.560099	1	1.5601	HC	cell wall.modification	Symbols: EXGT-A1, EXT | EXGT-A1 (ENDOXYLOGLUCAN TRANSFERASE); hydrolase, acting on glycosyl bonds / xyloglucan:xyloglucosyl transferase | chr2:2763526-2765720 FORWARD	PF00722,PF06955	10	10.7	extracellular	EX	X	n.a	n.a	n.a	0	0	0	0
AT4G36360.2;AT4G36360.1	AT4G36360	5	4	4	6.8	6	6	95.064	0	12.885	88927000	40	4	-1.90229	NaN	-1.42694	3	-0.475354	2.52465	0.710387	0.846154	1.55654	HC	misc.gluco-, galacto- and mannosidases.beta-galactosidase	Symbols: BGAL3 | BGAL3 (beta-galactosidase 3); beta-galactosidase/ catalytic/ cation binding / sugar binding | chr4:17176342-17181261 REVERSE	PF01301,PF02140,PF17834	26	26.3	extracellular	EX	X	n.a	n.a	n.a	0	0	0	0
AT5G04660.1;AT3G10570.1	AT5G04660	2	2	2	11.1	11.1	11.1	58.137	0.00020296	3.8784	75345000	24	2	-1.04565	NaN	-0.534585	3	-0.511064	2.48894	0.707411	0.846154	1.55357	HC	misc.cytochrome P450	Symbols: CYP77A4 | CYP77A4; electron carrier/ heme binding / iron ion binding / monooxygenase/ oxygen binding | chr5:1335995-1337670 FORWARD	PF00067	26	26.10	endoplasmic reticulum	ER	X	n.a	n.a	n.a	0	0	0	0
AT3G20290.3;AT3G20290.2;AT3G20290.1	AT3G20290	7	7	7	16.3	16.3	16.3	61.23	0	37.829	381300000	33	11	-1.46086	NaN	-0.947076	3	-0.513779	2.48622	0.707185	0.846154	1.55334	HC	signalling.calcium	Symbols: ATEHD1 | ATEHD1 (EPS15 HOMOLOGY DOMAIN 1); GTP binding / GTPase/ calcium ion binding | chr3:7074817-7078871 REVERSE	PF00350,PF12763,PF16880,PF18150	30	30.3	plasma membrane,cytosol	PM,C	X	n.a	n.a	n.a	0	0	0	0
AT4G35470.2;AT4G35470.1	AT4G35470	3	3	3	11.9	11.9	11.9	59.881	0	44.679	249830000	30	8	-1.21094	NaN	-0.544122	3	-0.666816	2.33318	0.694432	0.846154	1.54059	HC	signalling.receptor kinases	leucine-rich repeat family protein | chr4:16846301-16849150 FORWARD	PF00560,PF13855	30	30.2	plasma membrane	PM	X	n.a	n.a	n.a	0	0	0	0
AT1G02940.4;AT1G02940.1;AT1G02940.3;AT1G02940.2	AT1G02940	3	2	2	14.8	11.7	11.7	29.849	0	9.7197	67381000	13	4	-0.590001	NaN	NaN	3	3	6	1	0.538462	1.53846	HC	misc.glutathione S transferases	Symbols: ATGSTF5, GSTF5 | GSTF5 (GLUTATHIONE S-TRANSFERASE (CLASS PHI) 5); glutathione transferase | chr1:663079-664128 REVERSE	PF00043,PF02798	26	26.9	cytosol	C	X	n.a	n.a	n.a	0	0	0	0
AT2G02790.3;AT2G02790.2;AT2G02790.1	AT2G02790	2	2	2	4.2	4.2	4.2	65.266	0.00020674	4.1306	69867000	27	3	-0.9537	NaN	NaN	3	3	6	1	0.538462	1.53846	HC	signalling.calcium	Symbols: IQD29 | IQD29 (IQ-domain 29); calmodulin binding | chr2:787915-790946 FORWARD	PF00612,PF13178	30	30.3	nucleus	N	X	n.a	n.a	n.a	0	0	0	0
AT2G03150.1;AT2G03150.2	AT2G03150	6	6	6	6	6	6	150.91	0	13.989	87193000	57	6	-1.08152	NaN	NaN	3	3	6	1	0.538462	1.53846	HC	signalling.G-proteins	Symbols: emb1579 | emb1579 (embryo defective 1579); binding / calcium ion binding | chr2:951933-959188 FORWARD	PF14443	30	30.5	cytosol	C	X	n.a	n.a	n.a	0	0	0	0
AT3G29310.1	AT3G29310	8	8	8	12.9	12.9	12.9	61.496	0	20.551	201610000	20	15	-0.540442	NaN	NaN	3	3	6	1	0.538462	1.53846	HC	signalling.calcium	calmodulin-binding protein-related | chr3:11249652-11251820 FORWARD	#N/A	30	30.3	nucleus	N	X	n.a	n.a	n.a	0	0	0	0
AT4G05410.1	AT4G05410	13	13	13	27	27	27	56.518	0	109.22	286370000	23	32	-0.330339	NaN	NaN	3	3	6	1	0.538462	1.53846	HC	signalling.G-proteins	transducin family protein / WD-40 repeat family protein | chr4:2742932-2745627 REVERSE	PF00400,PF00400,PF00400,PF00400	30	30.5	nucleus	N	X	n.a	n.a	n.a	0	0	0	0
AT4G07410.2;AT4G07410.1	AT4G07410	5	5	5	8	8	8	78.023	0	10.504	104470000	41	17	-0.651481	NaN	NaN	3	3	6	1	0.538462	1.53846	HC	signalling.G-proteins	transducin family protein / WD-40 repeat family protein | chr4:4201249-4205224 REVERSE	PF00400	30	30.5	cytosol,nucleus	C,N	X	n.a	n.a	n.a	0	0	0	0
AT4G13730.2;AT4G13730.3;AT4G13730.1	AT4G13730	2	2	2	6.6	6.6	6.6	45.827	0	6.674	24627000	22	2	-0.872739	NaN	NaN	3	3	6	1	0.538462	1.53846	HC	signalling.G-proteins	RabGAP/TBC domain-containing protein | chr4:7970274-7974248 FORWARD	PF00566	30	30.5	golgi,plastid	G,P	X	n.a	n.a	n.a	0	0	0	0
AT5G22740.1	AT5G22740	1	1	1	2.8	2.8	2.8	61.558	0	7.1712	43924000	27	4	-1.08339	NaN	NaN	3	3	6	1	0.538462	1.53846	HC	cell wall.cellulose synthesis	Symbols: ATCSLA02, CSLA02, ATCSLA2 | ATCSLA02; mannan synthase/ transferase, transferring glycosyl groups | chr5:7554928-7560073 REVERSE	PF13632	10	10.2	golgi	G	X	n.a	n.a	n.a	0	0	0	0
AT5G66060.2;AT5G66060.1	AT5G66060	1	1	1	10.3	10.3	10.3	27.667	0	8.7705	79911000	12	3	-0.11978	NaN	NaN	3	3	6	1	0.538462	1.53846	HC	misc.oxidases - copper, flavone etc	iron ion binding / oxidoreductase/ oxidoreductase, acting on paired donors, with incorporation or reduction of molecular oxygen, 2-oxoglutarate as one donor, and incorporation of one atom each of oxygen into both donors | chr5:26419481-26421128 FORWARD	PF13640	26	26.7	golgi,mitochondrion	G,M	X	n.a	n.a	n.a	0	0	0	0
AT2G44450.1;AT2G44450.2;AT5G44640.1;AT2G25630.1	AT2G44450	6	6	6	16.6	16.6	16.6	56.905	0	17.747	148950000	26	13	-1.03605	-0.293048	NaN	-0.743	3	2.257	0.688083	0.846154	1.53424	HC	misc.gluco-, galacto- and mannosidases	Symbols: BGLU15 | BGLU15 (BETA GLUCOSIDASE 15); catalytic/ cation binding / hydrolase, hydrolyzing O-glycosyl compounds | chr2:18340921-18343849 FORWARD	PF00232	26	26.3	extracellular	EX	X	n.a	n.a	n.a	0	0	0	0
AT1G30440.1	AT1G30440	4	4	4	7.1	7.1	7.1	73.409	0	26.107	96795000	29	11	-0.890049	-0.0845948	NaN	-0.805454	3	2.19455	0.682879	0.846154	1.52903	HC	signalling.light	phototropic-responsive NPH3 family protein | chr1:10759475-10762394 FORWARD	PF00651,PF03000	30	30.11	plasma membrane	PM	X	n.a	n.a	n.a	0	0	0	0
AT5G44070.1;AT5G44070.2	AT5G44070	15	15	15	36.9	36.9	36.9	54.474	0	99.046	2007500000	26	63	-0.735244	NaN	0.0762629	3	-0.811507	2.18849	0.682374	0.846154	1.52853	HC	metal handling.binding, chelation and storage	Symbols: CAD1, ARA8, ATPCS1, PCS1 | CAD1 (CADMIUM SENSITIVE 1); cadmium ion binding / copper ion binding / glutathione gamma-glutamylcysteinyltransferase | chr5:17734738-17737859 FORWARD	PF05023,PF09328	15	15.2	plasma membrane	PM	X	n.a	n.a	n.a	0	0	0	0
AT5G12890.1	AT5G12890	6	6	6	17.6	17.6	17.6	54.867	0	90.292	517120000	19	16	-1.02185	NaN	-0.210263	3	-0.811589	2.18841	0.682368	0.846154	1.52852	HC	misc.UDP glucosyl and glucoronyl transferases	UDP-glucoronosyl/UDP-glucosyl transferase family protein | chr5:4069577-4071227 REVERSE	PF00201	26	26.2	extracellular,plasma membrane	EX,PM	X	n.a	n.a	n.a	0	0	0	0
AT1G56340.1;AT1G56340.2	AT1G56340	36	36	25	77.4	77.4	60.2	48.527	0	323.31	46486000000	27	460	1.60602	-0.240174	1.36553	1.84619	0.240492	2.08669	0.67389	0.846154	1.52004	HC	signalling.calcium	Symbols: CRT1 | CRT1 (CALRETICULIN 1); calcium ion binding / unfolded protein binding | chr1:21089844-21092660 REVERSE	PF00262,PF00262	30	30.3	endoplasmic reticulum	ER	X	n.a	n.a	n.a	0	0	0	0
AT4G27560.1	AT4G27560	12	12	7	41.3	41.3	27.3	50.615	0	323.31	2343400000	19	35	-0.861501	NaN	0.063629	3	-0.925131	2.07487	0.672906	0.846154	1.51906	HC	misc.UDP glucosyl and glucoronyl transferases	glycosyltransferase family protein | chr4:13759841-13761559 REVERSE	PF00201	26	26.2	extracellular	EX	X	n.a	n.a	n.a	0	0	0	0
AT5G63840.1;AT5G63840.2	AT5G63840	44	44	44	52.1	52.1	52.1	104.27	0	219.96	8607300000	43	234	0.449816	-0.959852	-0.153673	1.40967	0.603489	2.01316	0.667763	0.846154	1.51392	HC	misc.gluco-, galacto- and mannosidases.alpha-galactosidase	Symbols: RSW3 | RSW3 (RADIAL SWELLING 3); glucosidase/ hydrolase, hydrolyzing O-glycosyl compounds | chr5:25545056-25549199 FORWARD	PF01055,PF13802	26	26.3	endoplasmic reticulum	ER	X	n.a	n.a	n.a	0	0	0	0
AT5G48900.1	AT5G48900	13	9	6	38.1	27.8	22.1	46.727	0	97.782	2947800000	16	76	0.299201	-0.458453	-0.930632	0.757654	1.22983	1.98749	0.665624	0.846154	1.51178	HC	cell wall.degradation.pectate lyases and polygalacturonases	pectate lyase family protein | chr5:19825137-19829092 FORWARD	PF00544	10	10.6	extracellular	EX	X	n.a	n.a	n.a	0	0	0	0
AT4G22690.1;AT4G22710.1	AT4G22690	17	17	16	47.8	47.8	45.6	63.116	0	143.38	1852400000	28	66	-1.12319	NaN	-0.0895158	3	-1.03368	1.96632	0.66386	0.846154	1.51001	HC	misc.cytochrome P450	Symbols: CYP706A1 | CYP706A1; electron carrier/ heme binding / iron ion binding / monooxygenase/ oxygen binding | chr4:11929359-11931693 FORWARD	PF00067	26	26.10	endoplasmic reticulum	ER	X	n.a	n.a	n.a	0	0	0	0
AT3G08510.2;AT3G08510.1;AT3G08510.4;AT3G08510.3	AT3G08510	36	36	36	62.1	62.1	62.1	66.122	0	269.85	7531800000	31	188	0.206617	-1.26186	-0.247041	1.46848	0.453658	1.92214	0.660178	0.846154	1.50633	HC	signalling.phosphinositides.phosphoinositide phospholipase C	Symbols: ATPLC2 | ATPLC2 (PHOSPHOLIPASE C 2); phospholipase C | chr3:2582362-2585851 REVERSE	PF00168,PF00388,PF09279,PF00387	30	30.4	plasma membrane,mitochondrion	PM,M	X	n.a	n.a	n.a	0	0	0	0
AT1G12360.1	AT1G12360	6	6	6	10.7	10.7	10.7	75.082	0	15.693	853390000	38	15	0.337301	NaN	-1.33053	3	1.66783	4.66783	0.888986	0.615385	1.50437	HC	cell.vesicle transport	Symbols: KEU | KEU (keule); protein transporter | chr1:4200876-4206404 FORWARD	PF00995	31	31.4	plasma membrane	PM	Likely PD protein	n.a	n.a	n.a	0	0	0	0
AT1G04680.1	AT1G04680	16	15	12	39.2	31.6	26	47.77	0	141.62	4212600000	17	68	0.43821	-0.248309	-0.755803	0.686519	1.19401	1.88053	0.656711	0.846154	1.50286	HC	cell wall.degradation.pectate lyases and polygalacturonases	pectate lyase family protein | chr1:1303529-1307884 REVERSE	PF00544	10	10.6	extracellular	EX	X	n.a	n.a	n.a	0	0	0	0
AT3G62110.2;AT3G62110.1	AT3G62110	10	10	10	32.9	32.9	32.9	51.996	0	220.09	2178300000	17	47	-1.01579	NaN	0.124628	3	-1.14042	1.85958	0.654965	0.846154	1.50112	HC	cell wall.degradation.pectate lyases and polygalacturonases	glycoside hydrolase family 28 protein / polygalacturonase (pectinase) family protein | chr3:22997031-23000041 REVERSE	PF00295	10	10.6	extracellular	EX	X	n.a	n.a	n.a	0	0	0	0
AT1G57750.1;AT1G57750.2	AT1G57750	11	11	11	22.1	22.1	22.1	57.696	0	26.474	158890000	27	20	-0.207117	-0.680568	-1.57227	0.473452	1.36516	1.83861	0.653217	0.846154	1.49937	HC	misc.cytochrome P450	Symbols: MAH1, CYP96A15 | CYP96A15 (CYTOCHROME P450 96 A1); midchain alkane hydroxylase/ oxygen binding | chr1:21383981-21385709 REVERSE	PF00067	26	26.10	extracellular,endoplasmic reticulum	EX,ER	X	n.a	n.a	n.a	0	0	0	0
AT2G33330.1	AT2G33330	3	3	3	17.8	17.8	17.8	32.658	0	91.356	1277000000	13	35	0.553495	-0.396237	-0.330927	0.949732	0.884422	1.83415	0.652846	0.846154	1.499	HC	signalling.receptor kinases.DUF 26	Symbols: PDLP3 | PDLP3 (PLASMODESMATA-LOCATED PROTEIN 3) | chr2:14122890-14125137 REVERSE	PF01657,PF01657	30	30.2	extracellular	EX	Likely PD protein	PDLP3	n.a	n.a	0	0	0	0
AT5G56360.1	AT5G56360	27	27	27	41.4	41.4	41.4	73.213	0	277.86	2827200000	27	99	-0.0534579	-1.10204	-0.817421	1.04858	0.763963	1.81254	0.651045	0.846154	1.4972	HC	signalling.calcium	calmodulin-binding protein | chr5:22823302-22828025 REVERSE	PF12999,PF13015	30	30.3	endoplasmic reticulum	ER	X	n.a	n.a	n.a	0	0	0	0
AT1G75750.2;AT1G75750.1	AT1G75750	4	4	4	39.2	39.2	39.2	10.645	0	9.7495	176860000	5	11	1.31748	NaN	-0.228548	3	1.54602	4.54602	0.878835	0.615385	1.49422	HC	hormone metabolism.gibberelin.induced-regulated-responsive-activated	Symbols: GASA1 | GASA1 (GAST1 PROTEIN HOMOLOG 1) | chr1:28441526-28442367 REVERSE	PF02704	17	17.6	extracellular	EX	X	n.a	n.a	n.a	0	0	0	0
AT2G36870.1;AT2G36870.2	AT2G36870	13	13	13	43.1	43.1	43.1	34.482	0	99.924	1969800000	17	63	0.349647	-0.146832	-0.901465	0.496478	1.25111	1.74759	0.645633	0.846154	1.49179	HC	cell wall.modification	xyloglucan:xyloglucosyl transferase, putative / xyloglucan endotransglycosylase, putative / endo-xyloglucan transferase, putative | chr2:15472645-15474681 REVERSE	PF00722,PF06955	10	10.7	extracellular	EX	X	n.a	n.a	n.a	0	0	0	0
AT2G28950.1	AT2G28950	8	8	6	33.9	33.9	30	27.817	0	114.71	5926400000	9	61	1.37944	0.797406	0.227808	0.582032	1.15163	1.73366	0.644472	0.846154	1.49063	HC	cell wall.modification	Symbols: ATEXPA6, ATEXP6, ATHEXP ALPHA 1.8 | ATEXPA6 (ARABIDOPSIS THALIANA EXPANSIN A6) | chr2:12431341-12433595 REVERSE	PF01357,PF03330	10	10.7	extracellular	EX	X	n.a	n.a	n.a	0	0	0	0
AT2G22420.1	AT2G22420	11	11	11	46.2	46.2	46.2	36.67	0	109.47	1562600000	20	36	-1.07028	NaN	0.206802	3	-1.27708	1.72292	0.643576	0.846154	1.48973	HC	misc.peroxidases	peroxidase 17 (PER17) (P17) | chr2:9513219-9514535 FORWARD	PF00141	26	26.12	extracellular	EX	X	n.a	n.a	n.a	0	0	0	0
AT3G16370.1	AT3G16370	15	15	15	43.1	43.1	43.1	38.199	0	153.19	7937800000	15	110	0.765799	0.00994335	-0.188707	0.755856	0.954506	1.71036	0.64253	0.846154	1.48868	HC	misc.GDSL-motif lipase	GDSL-motif lipase/hydrolase family protein | chr3:5556710-5558589 FORWARD	PF00657	26	26.28	extracellular	EX	X	n.a	n.a	n.a	0	0	0	0
AT3G07010.2;AT3G07010.1	AT3G07010	15	15	11	46.7	46.7	35.5	42.802	0	261.77	7976600000	15	183	0.944247	0.793976	-0.583433	0.15027	1.52768	1.67795	0.639829	0.846154	1.48598	HC	cell wall.degradation.pectate lyases and polygalacturonases	pectate lyase family protein | chr3:2212728-2216483 REVERSE	PF00544	10	10.6	extracellular	EX	X	n.a	n.a	n.a	0	0	0	0
AT1G48480.1	AT1G48480	5	4	4	12.7	11.3	11.3	71.13	0	37.498	196190000	34	6	-0.190677	-1.13442	-0.888993	0.943742	0.698316	1.64206	0.636838	0.846154	1.48299	HC	signalling.receptor kinases.leucine rich repeat III	Symbols: RKL1 | RKL1; ATP binding / kinase/ protein serine/threonine kinase | chr1:17918391-17920985 FORWARD	PF07714,PF08263,PF13855	30	30.2	plasma membrane	PM	X	n.a	n.a	n.a	0	0	0	0
AT3G04290.1	AT3G04290	7	7	7	35.5	35.5	35.5	40.148	0	82.689	1400600000	11	62	0.620037	0.153454	-0.521621	0.466582	1.14166	1.60824	0.63402	0.846154	1.48017	HC	misc.GDSL-motif lipase	Symbols: ATLTL1, LTL1 | LTL1 (LI-TOLERANT LIPASE 1); carboxylesterase/ hydrolase, acting on ester bonds | chr3:1133320-1136316 REVERSE	PF00657	26	26.28	extracellular	EX	X	n.a	n.a	n.a	0	0	0	0
AT5G25610.1	AT5G25610	10	10	10	22.7	22.7	22.7	42.259	0	51.841	2271100000	24	35	0.287662	NaN	-1.07384	3	1.36151	4.36151	0.863459	0.615385	1.47884	HC	stress.abiotic.drought/salt	Symbols: RD22 | RD22; nutrient reservoir | chr5:8914233-8916800 REVERSE	PF03181	20	20.2	extracellular	EX	X	n.a	n.a	n.a	0	0	0	0
AT3G24480.1	AT3G24480	15	8	8	31	20.6	20.6	54.702	0	153.58	15650000000	14	144	0.838571	0.152023	-0.0600159	0.686548	0.898587	1.58513	0.632095	0.846154	1.47825	HC	cell wall.cell wall proteins.LRR	leucine-rich repeat family protein / extensin family protein | chr3:8901154-8902638 REVERSE	PF08263,PF13855	10	10.5	extracellular	EX	Likely PD protein	n.a	n.a	n.a	0	0	0	0
AT2G34250.3;AT2G34250.2;AT2G34250.1;AT1G29310.2;AT1G29310.1	AT2G34250	10	10	10	23.6	23.6	23.6	52.097	0	103.12	2621800000	15	72	0.421184	NaN	-0.932134	3	1.35332	4.35332	0.862777	0.615385	1.47816	HC	protein.targeting.secretory pathway.unspecified	protein transport protein sec61, putative | chr2:14462059-14464862 FORWARD	PF10559,PF00344	29	29.3.4	endoplasmic reticulum	ER	X	n.a	n.a	n.a	0	0	0	0
AT2G45220.1	AT2G45220	13	13	13	35.4	35.4	35.4	55.976	0	256.75	1894700000	31	47	0.00643287	-0.676615	-0.874464	0.683048	0.880897	1.56395	0.630329	0.846154	1.47648	HC	cell wall.pectin*esterases.misc	pectinesterase family protein | chr2:18644084-18646447 REVERSE	PF01095,PF04043	10	10.8	extracellular	EX	X	n.a	n.a	n.a	0	0	0	0
AT5G17420.1	AT5G17420	2	2	2	2.1	2.1	2.1	115.8	0.0081909	1.9623	237100000	48	2	-1.87368	NaN	-0.43665	3	-1.43703	1.56297	0.630248	0.846154	1.4764	HC	cell wall.cellulose synthesis.cellulose synthase	Symbols: IRX3, CESA7, ATCESA7, MUR10 | IRX3 (IRREGULAR XYLEM 3); cellulose synthase | chr5:5736630-5741465 REVERSE	PF03552,PF14569	10	10.2	plasma membrane	PM	X	n.a	n.a	n.a	0	0	0	0
AT1G09210.1	AT1G09210	36	25	25	73.3	58.7	58.7	48.156	0	169.22	8426300000	28	161	0.537221	-0.672769	0.185068	1.20999	0.352153	1.56214	0.630179	0.846154	1.47633	HC	signalling.calcium	calreticulin 2 (CRT2) | chr1:2972842-2976750 REVERSE	PF00262,PF00262	30	30.3	endoplasmic reticulum	ER	X	n.a	n.a	n.a	0	0	0	0
AT5G33370.1;AT5G33370.2	AT5G33370	7	7	7	21	21	21	40.359	0	36.606	774470000	16	43	0.0755929	-0.450986	-0.952512	0.526579	1.02811	1.55468	0.629557	0.846154	1.47571	HC	misc.GDSL-motif lipase	GDSL-motif lipase/hydrolase family protein | chr5:12602468-12604764 REVERSE	PF00657	26	26.28	extracellular	EX	X	n.a	n.a	n.a	0	0	0	0
AT2G16430.2;AT2G16430.1	AT2G16430	16	16	16	52.6	52.6	52.6	54.218	0	176.71	5378000000	22	162	0.675805	-0.0321134	-0.154803	0.707919	0.830608	1.53853	0.628211	0.846154	1.47436	HC	misc.acid and other phosphatases	Symbols: PAP10, ATPAP10 | PAP10 (PURPLE ACID PHOSPHATASE 10); acid phosphatase/ protein serine/threonine phosphatase | chr2:7120419-7122832 REVERSE	PF00149,PF14008	26	26.13	extracellular	EX	X	n.a	n.a	n.a	0	0	0	0
AT1G02640.1	AT1G02640	10	9	9	19.7	18.8	18.8	82.984	0	52.536	275440000	37	16	-0.72187	-1.28034	-1.69989	0.558472	0.978021	1.53649	0.628041	0.846154	1.47419	HC	cell wall.degradation.mannan-xylose-arabinose-fucose	Symbols: BXL2, ATBXL2 | BXL2 (BETA-XYLOSIDASE 2); hydrolase, hydrolyzing O-glycosyl compounds | chr1:564205-567769 FORWARD	PF00933,PF01915,PF14310	10	10.6	extracellular	EX	X	n.a	n.a	n.a	0	0	0	0
AT3G19320.1	AT3G19320	1	1	1	2.2	2.2	2.2	54.971	0.00020425	3.945	527530000	24	4	-1.17895	NaN	0.301713	3	-1.48066	1.51934	0.626612	0.846154	1.47277	HC	signalling.receptor kinases.misc	leucine-rich repeat family protein | chr3:6696395-6698073 REVERSE	#N/A	30	30.2	extracellular	EX	X	n.a	n.a	n.a	0	0	0	0
AT1G27190.1	AT1G27190	3	3	3	6.2	6.2	6.2	65.423	0	11.657	117240000	27	5	-0.650118	-1.29454	-1.47306	0.644424	0.822945	1.46737	0.622281	0.846154	1.46843	HC	signalling.receptor kinases.leucine rich repeat X	leucine-rich repeat transmembrane protein kinase, putative | chr1:9446657-9448825 REVERSE	PF07714,PF08263,PF13516,PF13516	30	30.2	plasma membrane	PM	X	n.a	n.a	n.a	0	0	0	0
AT1G31690.1	AT1G31690	14	14	14	24.1	24.1	24.1	76.673	0	52.045	792860000	33	43	-0.251391	-0.598532	-1.36986	0.347141	1.11847	1.46561	0.622134	0.846154	1.46829	HC	misc.oxidases - copper, flavone etc	amine oxidase/ copper ion binding / quinone binding | chr1:11343980-11347767 FORWARD	PF02727,PF01179,PF02728	26	26.7	extracellular	EX	X	n.a	n.a	n.a	0	0	0	0
AT1G07960.4;AT1G07960.3;AT1G07960.2;AT1G07960.1	AT1G07960	3	3	3	13.7	13.7	13.7	16.565	0	6.0218	63598000	8	5	0.484779	NaN	-0.705701	3	1.19048	4.19048	0.849207	0.615385	1.46459	HC	redox.thioredoxin.PDIL	Symbols: ATPDIL5-1 | ATPDIL5-1 (PDI-like 5-1) | chr1:2467189-2469139 FORWARD	PF00085	21	21.1	extracellular,endoplasmic reticulum	EX,ER	X	n.a	n.a	n.a	0	0	0	0
AT1G08160.1	AT1G08160	4	4	4	17.6	17.6	17.6	25.158	0	84.114	3326400000	9	37	0.588685	-0.595277	NaN	1.18396	3	4.18396	0.848663	0.615385	1.46405	HC	not assigned.no ontology	harpin-induced protein-related / HIN1-related / harpin-responsive protein-related | chr1:2559487-2560403 REVERSE	PF03168	35	35	plasma membrane	PM	X	n.a	n.a	n.a	0	0	0	0
AT1G72230.1	AT1G72230	4	4	4	39.2	39.2	39.2	18.371	0	69.424	1377900000	9	21	-0.935176	NaN	0.663119	3	-1.59829	1.40171	0.616809	0.846154	1.46296	HC	misc.plastocyanin-like	plastocyanin-like domain-containing protein | chr1:27188066-27189244 FORWARD	PF02298	26	26.19	extracellular	EX	X	n.a	n.a	n.a	0	0	0	0
AT1G32210.2;AT1G32210.1	AT1G32210	2	2	2	16.7	16.7	16.7	12.012	0	4.6013	158680000	3	5	0.7328	NaN	-0.437976	3	1.17078	4.17078	0.847565	0.615385	1.46295	HC	stress.biotic	Symbols: ATDAD1 | ATDAD1 (DEFENDER AGAINST APOPTOTIC DEATH 1) | chr1:11605857-11607768 REVERSE	PF02109	20	20.1	endoplasmic reticulum	ER	X	n.a	n.a	n.a	0	0	0	0
AT3G19240.1	AT3G19240	7	7	7	13.7	13.7	13.7	72.284	0	10.632	221240000	32	17	-0.5074	NaN	-1.62458	3	1.11718	4.11718	0.843098	0.615385	1.45848	HC	development.unspecified	FUNCTIONS IN: molecular_function unknown; INVOLVED IN: N-terminal protein myristoylation; LOCATED IN: cellular_component unknown; EXPRESSED IN: 25 plant structures; EXPRESSED DURING: 15 growth stages; CONTAINS InterPro DOMAIN/s: WD40 repeat-like (InterPro:IPR011046), Vacuolar import and degradation, Vid27-related (InterPro:IPR013863); BEST Arabidopsis thaliana protein match is: dem protein-relate…	PF08553	33	33.99	endoplasmic reticulum	ER	X	n.a	n.a	n.a	0	0	0	0
AT1G67750.1	AT1G67750	13	9	9	26.7	19.4	19.4	44.885	0	43.669	1949800000	12	41	0.294365	-0.492084	-0.263269	0.786449	0.557634	1.34408	0.612007	0.846154	1.45816	HC	cell wall.degradation.pectate lyases and polygalacturonases	pectate lyase family protein | chr1:25401588-25403503 FORWARD	PF00544	10	10.6	extracellular	EX	X	n.a	n.a	n.a	0	0	0	0
AT3G59920.1	AT3G59920	22	22	15	62.4	62.4	43.7	49.538	0	191.41	9665000000	23	130	-0.556198	NaN	1.10286	3	-1.65905	1.34095	0.611746	0.846154	1.4579	HC	signalling.G-proteins	Symbols: ATGDI2 | ATGDI2 (RAB GDP DISSOCIATION INHIBITOR 2); RAB GDP-dissociation inhibitor | chr3:22134999-22138457 FORWARD	PF00996	30	30.5	cytosol,extracellular	C,EX	X	n.a	n.a	n.a	0	0	0	0
AT1G45130.1;AT1G45130.2	AT1G45130	15	14	14	28.8	27.3	27.3	81.443	0	61.366	722990000	42	49	-0.60855	-1.40787	-1.08613	0.799322	0.47758	1.2769	0.606408	0.846154	1.45256	HC	misc.gluco-, galacto- and mannosidases.beta-galactosidase	Symbols: BGAL5 | BGAL5 (beta-galactosidase 5); beta-galactosidase/ catalytic/ cation binding | chr1:17065252-17069262 FORWARD	PF01301,PF17834	26	26.3	extracellular	EX	X	n.a	n.a	n.a	0	0	0	0
AT1G60870.1	AT1G60870	5	5	5	46.3	46.3	46.3	16.774	0	84.578	471250000	10	17	0.382603	NaN	-0.610822	3	0.993424	3.99342	0.832785	0.615385	1.44817	HC	not assigned.unknown	Symbols: MEE9 | MEE9 (maternal effect embryo arrest 9) | chr1:22409472-22410654 FORWARD	#N/A	35	35	extracellular	EX	Likely PD protein	n.a	n.a	n.a	0	0	0	0
AT4G11220.1	AT4G11220	4	2	2	13.7	8.5	8.5	30.28	0	39.809	3938700000	7	40	1.5664	NaN	0.595266	3	0.971135	3.97114	0.830928	0.615385	1.44631	HC	not assigned.no ontology	Symbols: BTI2 | BTI2 (VIRB2-INTERACTING PROTEIN 2) | chr4:6837911-6839795 REVERSE	PF02453	35	35	endoplasmic reticulum	ER	X	n.a	n.a	n.a	0	0	0	0
AT5G52420.1	AT5G52420	2	2	2	10.3	10.3	10.3	26.737	0	4.9435	65810000	10	4	0.190575	NaN	-0.772211	3	0.962786	3.96279	0.830232	0.615385	1.44562	HC	not assigned.unknown	unknown protein | chr5:21281773-21282806 FORWARD	#N/A	35	35	endoplasmic reticulum	ER	X	n.a	n.a	n.a	0	0	0	0
AT3G28200.1	AT3G28200	7	7	7	27.5	27.5	27.5	35.302	0	32.065	1744000000	18	47	0.395782	-0.478186	0.0877154	0.873967	0.308066	1.18203	0.598503	0.846154	1.44466	HC	misc.peroxidases	peroxidase, putative | chr3:10518070-10519166 FORWARD	PF00141	26	26.12	extracellular	EX	X	n.a	n.a	n.a	0	0	0	0
AT5G62890.3;AT5G62890.2;AT5G62890.1;AT5G62890.4	AT5G62890	17	17	16	38.2	38.2	36.3	57.579	0	323.31	22339000000	15	206	1.16236	0.246107	NaN	0.916253	3	3.91625	0.826354	0.615385	1.44174	HC	transport.misc	permease, putative | chr5:25243417-25247377 FORWARD	PF00860	34	34.99	vacuole,plasma membrane	V,PM	X	n.a	n.a	n.a	0	0	0	0
AT1G73370.2;AT1G73370.3;AT1G73370.1	AT1G73370	14	14	13	19.7	19.7	18.7	102.03	0	75.32	801050000	50	52	-0.430389	NaN	-1.32947	3	0.899076	3.89908	0.824923	0.615385	1.44031	HC	major CHO metabolism.degradation.sucrose.Susy	Symbols: SUS6, ATSUS6 | SUS6 (SUCROSE SYNTHASE 6); UDP-glycosyltransferase/ sucrose synthase | chr1:27584479-27588326 REVERSE	PF00534,PF00862	2	2.2	plasma membrane,cytosol	PM,C	X	n.a	n.a	n.a	0	0	0	0
AT2G34310.5;AT2G34310.7;AT2G34310.6;AT2G34310.4;AT2G34310.3;AT2G34310.2;AT2G34310.1	AT2G34310	7	7	7	38	38	38	25.295	0	29.931	427390000	16	22	-0.280904	NaN	-1.17512	3	0.894213	3.89421	0.824518	0.615385	1.4399	HC	not assigned.unknown	unknown protein | chr2:14477745-14479962 REVERSE	#N/A	35	35	plasma membrane,nucleus	PM,N	X	n.a	n.a	n.a	0	0	0	0
AT4G02290.1;AT4G02290.2	AT4G02290	7	6	6	17.1	15.3	15.3	57.301	0	45.843	126750000	24	18	-0.698078	-1.21823	-1.2997	0.520157	0.601619	1.12178	0.593481	0.846154	1.43964	HC	misc.gluco-, galacto- and mannosidases.endoglucanase	Symbols: AtGH9B13 | AtGH9B13 (Arabidopsis thaliana glycosyl hydrolase 9B13); catalytic/ hydrolase, hydrolyzing O-glycosyl compounds | chr4:1002394-1005253 REVERSE	PF00759	26	26.3	extracellular	EX	X	n.a	n.a	n.a	0	0	0	0
AT3G28980.3;AT3G28980.2;AT3G28980.5;AT3G28980.4;AT3G28980.1;AT3G28820.1	AT3G28980	2	2	2	7.1	7.1	7.1	44.041	0	8.7865	183970000	21	11	-0.457016	NaN	-1.34558	3	0.88856	3.88856	0.824047	0.615385	1.43943	HC	not assigned.unknown	unknown protein | chr3:10993190-10995002 REVERSE	PF06746,PF06746	35	35	extracellular	EX	X	n.a	n.a	n.a	0	0	0	0
AT5G62390.1	AT5G62390	25	24	24	39.9	39.9	39.9	51.567	0	203	5730300000	16	198	0.935786	0.424824	0.328728	0.510961	0.607058	1.11802	0.593168	0.846154	1.43932	HC	signalling.calcium	Symbols: ATBAG7 | ATBAG7 (ARABIDOPSIS THALIANA BCL-2-ASSOCIATED ATHANOGENE 7); calmodulin binding | chr5:25051978-25054289 REVERSE	#N/A	30	30.3	endoplasmic reticulum	ER	X	n.a	n.a	n.a	0	0	0	0
AT3G55430.1	AT3G55430	10	10	10	29	29	29	48.442	0	32.3	479530000	21	30	-0.302274	-0.992726	-0.729134	0.690452	0.42686	1.11731	0.593109	0.846154	1.43926	HC	misc.beta 1,3 glucan hydrolases.glucan endo-1,3-beta-glucosidase	glycosyl hydrolase family 17 protein / beta-1,3-glucanase, putative | chr3:20549599-20552215 REVERSE	PF00332,PF07983	26	26.4	extracellular	EX	X	n.a	n.a	n.a	0	0	0	0
AT1G67140.1;AT1G67140.3;AT1G67140.2	AT1G67140	1	1	1	0.6	0.6	0.6	244.25	0	25.819	112870000	111	9	-1.63362	NaN	-2.51882	3	0.885197	3.8852	0.823766	0.615385	1.43915	HC	not assigned.unknown	Symbols: SWEETIE | SWEETIE (SWEETIE); binding | chr1:25100908-25117372 REVERSE	#N/A	35	35	golgi,plasma membrane,extracellular	G,PM,EX	X	n.a	n.a	n.a	0	0	0	0
AT5G52200.3;AT5G52200.2;AT5G52200.1	AT5G52200	3	3	3	24.2	24.2	24.2	16.612	0	25.306	456180000	7	19	0.505983	NaN	-0.364745	3	0.870728	3.87073	0.822561	0.615385	1.43795	HC	not assigned.unknown	unknown protein | chr5:21202639-21204759 REVERSE	PF04979	35	35	nucleus,plasma membrane	N,PM	X	n.a	n.a	n.a	0	0	0	0
AT3G23660.2	AT3G23660	4	3	1	9.7	8.2	0.9	87.217	0	5.0059	85269000	28	3	-0.165254	NaN	-1.03574	3	0.870485	3.87049	0.82254	0.615385	1.43793	HC	protein.targeting.secretory pathway.golgi	transport protein, putative | chr3:8513457-8517790 REVERSE	PF00626,PF04810,PF04811,PF04815,PF08033	29	29.3.4	endoplasmic reticulum,cytosol,golgi	ER,C,G	X	n.a	n.a	n.a	0	0	0	0
AT5G58430.1	AT5G58430	4	4	4	10.9	10.9	10.9	70.639	0	7.4177	89065000	36	7	-1.09702	NaN	-1.96272	3	0.8657	3.8657	0.822142	0.615385	1.43753	HC	RNA.regulation of transcription.unclassified	Symbols: ATEXO70B1 | ATEXO70B1 (exocyst subunit EXO70 family protein B1); protein binding | chr5:23621183-23623444 REVERSE	PF03081	27	27.3	plasma membrane	PM	X	n.a	n.a	n.a	0	0	0	0
AT3G51050.1	AT3G51050	5	5	5	9	9	9	77.674	0	18.868	92402000	29	12	-0.835778	NaN	-1.67739	3	0.841608	3.84161	0.820134	0.615385	1.43552	HC	not assigned.no ontology	FG-GAP repeat-containing protein | chr3:18953923-18957956 FORWARD	#N/A	35	35	endoplasmic reticulum	ER	X	n.a	n.a	n.a	0	0	0	0
AT4G28780.1	AT4G28780	8	8	8	24.3	24.3	24.3	39.896	0	74.887	326560000	14	20	0.140474	-0.244631	-0.52979	0.385104	0.670263	1.05537	0.587947	0.846154	1.4341	HC	misc.GDSL-motif lipase	GDSL-motif lipase/hydrolase family protein | chr4:14215545-14217579 FORWARD	PF00657	26	26.28	extracellular	EX	X	n.a	n.a	n.a	0	0	0	0
AT3G11660.1	AT3G11660	6	6	6	43.5	43.5	43.5	23.664	0	57.29	8449600000	11	84	1.25703	-0.477526	-0.828789	1.73455	2.08581	3.82037	0.818364	0.615385	1.43375	HC	stress.biotic	Symbols: NHL1 | NHL1 | chr3:3678835-3679943 REVERSE	PF03168	20	20.1	plasma membrane	PM	X	n.a	n.a	n.a	0	0	0	0
AT5G20520.1	AT5G20520	2	2	2	7.5	7.5	7.5	34.341	0	4.5951	31780000	18	3	-0.750733	NaN	-1.56664	3	0.815902	3.8159	0.817992	0.615385	1.43338	HC	development.unspecified	Symbols: WAV2 | WAV2 (WAVY GROWTH 2) | chr5:6943154-6946454 REVERSE	PF00326	33	33.99	endoplasmic reticulum	ER	X	n.a	n.a	n.a	0	0	0	0
AT4G24780.2;AT4G24780.1	AT4G24780	18	18	12	49	49	29.7	45.013	0	323.31	9539500000	16	148	0.736046	0.0103273	0.422575	0.725719	0.313471	1.03919	0.586599	0.846154	1.43275	HC	cell wall.degradation.pectate lyases and polygalacturonases	pectate lyase family protein | chr4:12770331-12772333 REVERSE	PF00544	10	10.6	extracellular	EX	X	n.a	n.a	n.a	0	0	0	0
AT5G45160.1	AT5G45160	9	7	7	12.4	10.2	10.2	93.568	0	54.835	377100000	47	19	-0.770128	NaN	-1.57448	3	0.804352	3.80435	0.817029	0.615385	1.43241	HC	development.unspecified	root hair defective 3 GTP-binding (RHD3) family protein | chr5:18264717-18270283 FORWARD	PF05879	33	33.99	endoplasmic reticulum	ER	X	n.a	n.a	n.a	0	0	0	0
AT5G12940.1	AT5G12940	18	18	18	44.5	44.5	44.5	39.952	0	95.291	6405500000	21	117	0.519712	-0.11892	0.126368	0.638632	0.393345	1.03198	0.585998	0.846154	1.43215	HC	signalling.receptor kinases.leucine rich repeat XI	leucine-rich repeat family protein | chr5:4087712-4089004 FORWARD	PF08263,PF00560,PF13855,PF13855	30	30.2	extracellular	EX	X	n.a	n.a	n.a	0	0	0	0
AT3G62730.1;AT3G62730.2	AT3G62730	2	2	2	11	11	11	34.731	0.00020542	4.0412	416070000	19	2	0.755734	-0.0389196	NaN	0.794654	3	3.79465	0.816221	0.615385	1.43161	HC	stress.abiotic.drought/salt	unknown protein | chr3:23207854-23209471 REVERSE	PF13668	20	20.2	extracellular	EX	X	n.a	n.a	n.a	0	0	0	0
AT5G10480.2;AT5G10480.1;AT5G10480.3	AT5G10480	3	3	3	21.9	21.9	21.9	22.414	0	7.9406	37890000	10	5	-0.382993	NaN	-1.16661	3	0.783617	3.78362	0.815301	0.615385	1.43069	HC	protein.postranslational modification	Symbols: PAS2, PEP | PAS2 (PASTICCINO 2); enoyl-CoA hydratase/ protein tyrosine phosphatase | chr5:3297804-3300151 REVERSE	PF04387	29	29.4	endoplasmic reticulum,cytosol,nucleus	ER,C,N	X	n.a	n.a	n.a	0	0	0	0
AT2G43050.1	AT2G43050	7	5	5	15.8	12.7	12.7	56.588	0	37.115	162420000	25	12	-0.621873	-1.40553	-0.84988	0.783658	0.228007	1.01167	0.584305	0.846154	1.43046	HC	cell wall.pectin*esterases.PME	Symbols: ATPMEPCRD | ATPMEPCRD; enzyme inhibitor/ pectinesterase | chr2:17902484-17904443 FORWARD	PF01095,PF04043	10	10.8	extracellular	EX	X	n.a	n.a	n.a	0	0	0	0
AT1G08450.2;AT1G08450.1;AT1G08450.3	AT1G08450	14	14	14	41.9	41.9	41.9	43.594	0	72.149	2599100000	22	97	0.113933	-0.949488	0.182414	1.06342	-0.068481	0.99494	0.582912	0.846154	1.42907	HC	signalling.calcium	Symbols: CRT3 | CRT3 (CALRETICULIN 3); calcium ion binding / unfolded protein binding | chr1:2667825-2671832 REVERSE	PF00262,PF00262	30	30.3	endoplasmic reticulum	ER	X	n.a	n.a	n.a	0	0	0	0
AT1G05320.6;AT1G05320.5;AT1G05320.9;AT1G05320.8;AT1G05320.7;AT1G05320.4;AT1G05320.3;AT1G05320.2;AT1G05320.1	AT1G05320	10	9	9	18.3	17	17	76.499	0	69.128	250170000	40	20	-0.907788	NaN	-1.66923	3	0.761441	3.76144	0.813453	0.615385	1.42884	HC	cell.organisation	FUNCTIONS IN: molecular_function unknown; INVOLVED IN: biological_process unknown; LOCATED IN: cellular_component unknown; EXPRESSED IN: fruit; CONTAINS InterPro DOMAIN/s: Prefoldin (InterPro:IPR009053); BEST Arabidopsis thaliana protein match is: unknown protein (TAIR:AT2G32240.1); Has 205658 Blast hits to 89336 proteins in 2499 species: Archae - 2336; Bacteria - 33619; Metazoa - 92986; Fungi - …	#N/A	31	31.1	endoplasmic reticulum,nucleus	ER,N	X	n.a	n.a	n.a	0	0	0	0
AT4G38540.1	AT4G38540	2	2	2	7.1	7.1	7.1	45.505	0	12.087	1143700000	20	6	0.83937	NaN	-0.840715	3	1.68009	4.68009	0.890007	0.538462	1.42847	HC	misc.oxidases - copper, flavone etc	monooxygenase, putative (MO2) | chr4:18023121-18025027 FORWARD	PF01494	26	26.7	golgi	G	X	n.a	n.a	n.a	0	0	0	0
AT1G68560.1	AT1G68560	57	57	48	63.1	63.1	58	102.4	0	323.31	89122000000	45	1001	1.81135	1.51975	1.13189	0.291603	0.679463	0.971067	0.580922	0.846154	1.42708	HC	misc.gluco-, galacto- and mannosidases.alpha-galactosidase	Symbols: ATXYL1, XYL1 | XYL1 (ALPHA-XYLOSIDASE 1); alpha-N-arabinofuranosidase/ hydrolase, hydrolyzing O-glycosyl compounds / xylan 1,4-beta-xylosidase | chr1:25734182-25738002 REVERSE	PF13802,PF16863,PF01055	26	26.3	extracellular	EX	X	n.a	n.a	n.a	0	0	0	0
AT4G15630.1	AT4G15630	1	1	1	7.9	7.9	7.9	20.109	0	5.1334	231260000	6	10	0.298516	NaN	-0.44131	3	0.739826	3.73983	0.811652	0.615385	1.42704	HC	not assigned.no ontology	integral membrane family protein | chr4:8917430-8918852 FORWARD	PF04535	35	35	plasma membrane	PM	X	n.a	n.a	n.a	0	0	0	0
AT5G47180.2;AT5G47180.1	AT5G47180	2	2	2	12.7	12.7	12.7	24.667	0	73.019	91887000	14	7	-0.299985	NaN	-1.03174	3	0.731759	3.73176	0.81098	0.615385	1.42636	HC	cell.vesicle transport	vesicle-associated membrane family protein / VAMP family protein | chr5:19161142-19163432 REVERSE	PF00635	31	31.4	endoplasmic reticulum,nucleus	ER,N	X	n.a	n.a	n.a	0	0	0	0
AT4G27170.1	AT4G27170	5	4	3	24.7	20.5	13.3	19.169	0	16.684	1011800000	8	32	0.187623	NaN	-0.540223	3	0.727846	3.72785	0.810654	0.615385	1.42604	HC	development.storage proteins	2S seed storage protein 4 / 2S albumin storage protein / NWMU2-2S albumin 4 | chr4:13613596-13614283 FORWARD	PF00234	33	33.1	extracellular,vacuole	EX,V	X	n.a	n.a	n.a	0	0	0	0
AT2G41800.1	AT2G41800	3	3	3	11.1	11.1	11.1	40.37	0	6.6484	113750000	18	6	-0.446326	NaN	-1.16411	3	0.717786	3.71779	0.809815	0.615385	1.4252	HC	not assigned.unknown	FUNCTIONS IN: molecular_function unknown; INVOLVED IN: biological_process unknown; LOCATED IN: cell wall, plant-type cell wall; EXPRESSED IN: 7 plant structures; EXPRESSED DURING: 4 anthesis, C globular stage, petal differentiation and expansion stage; CONTAINS InterPro DOMAIN/s: Protein of unknown function DUF642 (InterPro:IPR006946), Galactose-binding like (InterPro:IPR008979); BEST Arabidopsis…	PF04862,PF04862	35	35	extracellular	EX	X	n.a	n.a	n.a	0	0	0	0
AT5G11110.1	AT5G11110	9	6	6	13.1	10.7	10.7	116.96	0	30.688	401290000	49	19	-0.910962	NaN	-1.6279	3	0.716936	3.71694	0.809745	0.615385	1.42513	HC	major CHO metabolism.synthesis.sucrose.SPS	Symbols: SPS1, ATSPS2F, KNS2 | ATSPS2F (SUCROSE PHOSPHATE SYNTHASE 2F); sucrose-phosphate synthase | chr5:3536226-3541133 FORWARD	PF00534,PF05116,PF00862	2	2.1	plasma membrane	PM	X	n.a	n.a	n.a	0	0	0	0
AT1G09560.1	AT1G09560	5	3	3	25.6	15.1	15.1	22.868	0	28.036	521670000	7	19	0.688295	NaN	-0.0261086	3	0.714404	3.7144	0.809534	0.615385	1.42492	HC	stress.abiotic.unspecified	Symbols: GLP5 | GLP5 (GERMIN-LIKE PROTEIN 5); manganese ion binding / nutrient reservoir | chr1:3093839-3094864 FORWARD	PF00190	20	20.2	extracellular	EX	Likely PD protein	n.a	n.a	n.a	0	0	0	0
AT2G16660.2;AT2G16660.1	AT2G16660	5	5	4	15.6	15.6	12.6	42.544	0	38.623	165370000	14	11	-0.192834	NaN	-0.898153	3	0.705319	3.70532	0.808777	0.615385	1.42416	HC	development.unspecified	nodulin family protein | chr2:7218706-7221625 REVERSE	PF06813	33	33.99	plasma membrane	PM	X	n.a	n.a	n.a	0	0	0	0
AT2G25430.1	AT2G25430	11	4	4	16.1	7.2	7.2	72.083	0	8.3507	137690000	37	5	-0.793449	NaN	-1.49167	3	0.698222	3.69822	0.808185	0.615385	1.42357	HC	not assigned.no ontology.epsin N-terminal homology (ENTH) domain-containing protein	epsin N-terminal homology (ENTH) domain-containing protein | chr2:10822370-10824916 FORWARD	PF07651,PF07651	35	35	plasma membrane	PM	X	n.a	n.a	n.a	0	0	0	0
AT3G12610.1	AT3G12610	7	7	7	30.1	30.1	30.1	39.556	0	20.896	85072000	20	6	-0.270212	NaN	-0.966257	3	0.696045	3.69605	0.808004	0.615385	1.42339	HC	DNA.repair	Symbols: DRT100 | DRT100 (DNA-DAMAGE REPAIR/TOLERATION 100); nucleotide binding / protein binding | chr3:4006399-4007807 REVERSE	PF13516,PF08263,PF13855,PF00560	28	28.2	extracellular	EX	X	n.a	n.a	n.a	0	0	0	0
AT3G15880.3;AT3G15880.4;AT3G15880.1;AT3G15880.2	AT3G15880	10	2	2	9.3	2.8	2.8	122.92	0.00020375	3.9263	87216000	49	2	-0.706928	NaN	-1.39892	3	0.691996	3.692	0.807666	0.615385	1.42305	HC	development.unspecified	Symbols: WSIP2, TPR4 | protein binding | chr3:5364081-5372289 REVERSE	PF00400,PF00400,PF00400	33	33.99	nucleus,cytosol,endoplasmic reticulum	N,C,ER	X	n.a	n.a	n.a	0	0	0	0
AT4G19640.1;AT4G19640.2;AT4G19640.3;AT5G45130.1;AT5G45130.2	AT4G19640	4	3	3	23.5	18	18	21.873	0	4.3913	274200000	12	7	-0.227916	-0.955669	-0.416347	0.727752	0.18843	0.916182	0.576349	0.846154	1.4225	HC	signalling.G-proteins	Symbols: ARA7, ARA-7, ATRABF2B, ATRAB5B, RABF2B, ATRAB-F2B, RAB-F2B | ARA7; GTP binding | chr4:10687198-10689617 REVERSE	PF00071	30	30.5	endoplasmic reticulum,golgi	ER,G	X	n.a	n.a	n.a	0	0	0	0
AT1G71695.1	AT1G71695	14	14	14	42.2	42.2	42.2	39.559	0	135.45	11654000000	15	227	1.42424	0.881751	1.05497	0.542485	0.369267	0.911752	0.575979	0.846154	1.42213	HC	misc.peroxidases	peroxidase 12 (PER12) (P12) (PRXR6) | chr1:26964249-26966688 FORWARD	PF00141	26	26.12	extracellular	EX	X	n.a	n.a	n.a	0	0	0	0
AT5G09440.1	AT5G09440	14	14	12	40.3	40.3	33.1	29.474	0	59.716	11803000000	13	123	1.5264	0.94262	1.20048	0.583782	0.325925	0.909707	0.575809	0.846154	1.42196	HC	signalling.in sugar and nutrient physiology	Symbols: EXL4 | EXL4 (EXORDIUM LIKE 4) | chr5:2938347-2939461 FORWARD	PF04674	30	30.1	extracellular	EX	X	n.a	n.a	n.a	0	0	0	0
AT5G49830.1;AT5G49830.3;AT5G49830.2	AT5G49830	2	2	2	5.2	5.2	5.2	82.747	0	20.119	23811000	40	4	-1.13816	NaN	-1.81606	3	0.677901	3.6779	0.806492	0.615385	1.42188	HC	not assigned.unknown	EXPRESSED IN: 22 plant structures; EXPRESSED DURING: 13 growth stages; CONTAINS InterPro DOMAIN/s: Vps51/Vps67 (InterPro:IPR014812); BEST Arabidopsis thaliana protein match is: unknown protein (TAIR:AT1G10385.1). | chr5:20250486-20255039 REVERSE	PF16528,PF08700	35	35	plasma membrane,cytosol,nucleus	PM,C,N	X	n.a	n.a	n.a	0	0	0	0
AT4G11190.1	AT4G11190	3	3	3	21.2	21.2	21.2	20.939	0	11.82	28095000	8	3	-0.272471	NaN	-0.946224	3	0.673753	3.67375	0.806146	0.615385	1.42153	HC	stress.biotic.PR-proteins	disease resistance-responsive family protein / dirigent family protein | chr4:6826677-6827383 FORWARD	PF03018	20	20.1	extracellular	EX	X	n.a	n.a	n.a	0	0	0	0
AT1G22610.1	AT1G22610	27	26	25	29.4	29.4	29.4	118.36	0	195.12	6861700000	44	159	0.0905102	-0.577081	NaN	0.667591	3	3.66759	0.805633	0.615385	1.42102	HC	not assigned.no ontology.C2 domain-containing protein	C2 domain-containing protein | chr1:7994291-7997588 FORWARD	PF00168,PF00168,PF00168,PF00168,PF08372	35	35	extracellular	EX	Likely PD protein	MCTP6	PNET-like	0	0	0	0	0
AT4G33400.1	AT4G33400	5	5	5	6	6	6	71.628	0	19.517	149960000	28	13	-0.787784	NaN	-1.44896	3	0.66118	3.66118	0.805098	0.615385	1.42048	HC	development.unspecified	dem protein-related / defective embryo and meristems protein-related | chr4:16077917-16080521 REVERSE	PF08553	33	33.99	endoplasmic reticulum	ER	X	n.a	n.a	n.a	0	0	0	0
AT1G05850.2;AT1G05850.1	AT1G05850	2	2	2	9.7	9.7	9.7	35.579	0	6.0173	92458000	12	5	-0.208262	NaN	-0.858192	3	0.64993	3.64993	0.804161	0.615385	1.41955	HC	stress.biotic	Symbols: POM1, ERH2, ELP1, CTL1, ELP, HOT2, ATCTL1 | POM1 (POM-POM1); chitinase | chr1:1766503-1768695 REVERSE	PF00182	20	20.1	extracellular	EX	X	n.a	n.a	n.a	0	0	0	0
AT1G04430.3;AT1G04430.2;AT1G04430.1	AT1G04430	9	5	5	17.3	12.2	12.2	70.507	0	30.024	355910000	35	20	-0.651944	NaN	-1.297	3	0.645056	3.64506	0.803755	0.615385	1.41914	HC	stress.abiotic.drought/salt	dehydration-responsive protein-related | chr1:1198118-1201527 FORWARD	PF03141	20	20.2	golgi,endoplasmic reticulum	G,ER	X	n.a	n.a	n.a	0	0	0	0
AT5G18970.1	AT5G18970	3	3	3	14.6	14.6	14.6	18.019	0	8.612	2228900000	3	20	1.78903	1.15191	NaN	0.637118	3	3.63712	0.803093	0.615385	1.41848	HC	transport.misc	AWPM-19-like membrane family protein | chr5:6333211-6334642 REVERSE	PF05512	34	34.99	extracellular	EX	X	n.a	n.a	n.a	0	0	0	0
AT2G47670.1	AT2G47670	4	4	4	20.7	20.7	20.7	23.177	0	13.644	505970000	9	14	0.353111	0.336684	-0.497254	0.0164263	0.850365	0.866791	0.572233	0.846154	1.41839	HC	misc.invertase/pectin methylesterase inhibitor family protein	invertase/pectin methylesterase inhibitor family protein | chr2:19543991-19544806 REVERSE	PF04043	26	26.18	extracellular	EX	X	n.a	n.a	n.a	0	0	0	0
AT1G22710.1	AT1G22710	1	1	1	3.1	3.1	3.1	54.546	0	11.468	73997000	15	8	-0.715614	NaN	-1.3499	3	0.634287	3.63429	0.802857	0.615385	1.41824	HC	transport.sugars.sucrose	Symbols: SUC2, SUT1, ATSUC2 | SUC2 (SUCROSE-PROTON SYMPORTER 2); carbohydrate transmembrane transporter/ sucrose transmembrane transporter/ sucrose:hydrogen symporter/ sugar:hydrogen symporter | chr1:8030641-8033117 REVERSE	PF13347	34	34.2	plasma membrane	PM	X	n.a	n.a	n.a	0	0	0	0
AT1G76390.2;AT1G76390.1	AT1G76390	2	2	2	5.3	5.3	5.3	89.108	0	9.0623	18111000	44	4	-1.57218	NaN	-2.2057	3	0.633525	3.63352	0.802794	0.615385	1.41818	HC	protein.degradation.ubiquitin.E3.RING	armadillo/beta-catenin repeat family protein / U-box domain-containing protein | chr1:28655399-28658711 FORWARD	PF04564	29	29.5.11.4	plasma membrane,cytosol	PM,C	X	n.a	n.a	n.a	0	0	0	0
AT4G37640.1	AT4G37640	6	6	6	9.3	9.3	9.3	110.44	0	14.33	186890000	39	12	-1.05011	-1.08091	-1.87941	0.030802	0.829299	0.860101	0.571675	0.846154	1.41783	HC	signalling.calcium	Symbols: ACA2 | ACA2 (CALCIUM ATPASE 2); calcium ion transmembrane transporter/ calcium-transporting ATPase/ calmodulin binding | chr4:17682977-17686941 REVERSE	PF00122,PF00689,PF00690,PF12515,PF13246	30	30.3	endoplasmic reticulum	ER	X	n.a	n.a	n.a	0	0	0	0
AT1G04660.1	AT1G04660	1	1	1	11.8	11.8	11.8	18.312	0	30.092	100800000	6	6	0.46953	-0.158638	NaN	0.628168	3	3.62817	0.802347	0.615385	1.41773	HC	not assigned.no ontology.glycine rich proteins	glycine-rich protein | chr1:1300486-1301773 REVERSE	#N/A	35	35	extracellular	EX	X	n.a	n.a	n.a	0	0	0	0
AT5G61790.1	AT5G61790	25	25	17	43.8	43.8	31.9	60.485	0	198.89	19987000000	32	269	0.970121	0.371276	0.725853	0.598845	0.244268	0.843113	0.570259	0.846154	1.41641	HC	signalling.calcium	Symbols: CNX1, ATCNX1 | calnexin 1 (CNX1) | chr5:24827102-24829791 REVERSE	PF00262	30	30.3	endoplasmic reticulum	ER	Likely PD protein	n.a	n.a	n.a	0	0	0	0
AT1G17840.1	AT1G17840	5	5	5	15.8	15.8	15.8	78.412	0	18.269	57955000	33	7	-0.785037	NaN	-1.39641	3	0.611371	3.61137	0.800948	0.615385	1.41633	HC	transport.ABC transporters and multidrug resistance systems	Symbols: WBC11, ABCG11, DSO, COF1, ATWBC11 | WBC11 (WHITE-BROWN COMPLEX HOMOLOG PROTEIN 11); ATPase, coupled to transmembrane movement of substances / fatty acid transporter | chr1:6142564-6146521 FORWARD	PF01061,PF19055,PF00005	34	34.16	plasma membrane	PM	X	n.a	n.a	n.a	0	0	0	0
AT3G10260.1;AT3G10260.2;AT3G10260.3	AT3G10260	4	4	4	18.6	18.6	18.6	27.912	0	56.523	423820000	8	18	-0.0905639	NaN	-0.696931	3	0.606367	3.60637	0.800531	0.615385	1.41592	HC	not assigned.no ontology	reticulon family protein | chr3:3171222-3172959 REVERSE	PF02453	35	35	vacuole,plasma membrane,mitochondrion	V,PM,M	X	n.a	n.a	n.a	0	0	0	0
AT3G24550.1	AT3G24550	9	9	8	17.8	17.8	16.6	69.271	0	25.124	320480000	26	16	-0.523334	-0.748972	-1.12924	0.225638	0.60591	0.831549	0.569296	0.846154	1.41545	HC	signalling.receptor kinases.proline extensin like	Symbols: ATPERK1 | ATPERK1 (PROLINE EXTENSIN-LIKE RECEPTOR KINASE 1); ATP binding / protein kinase | chr3:8960258-8963568 FORWARD	PF07714	30	30.2	plasma membrane	PM	X	n.a	n.a	n.a	0	0	0	0
AT3G22950.2;AT3G22950.1	AT3G22950	2	2	2	15.8	15.8	15.8	20.548	0.0013346	2.8052	162970000	10	2	0.387377	NaN	-0.212312	3	0.599689	3.59969	0.799974	0.615385	1.41536	HC	protein.targeting.secretory pathway.unspecified	Symbols: ATARFC1 | ATARFC1 (ADP-ribosylation factor C1); GTP binding | chr3:8136182-8137921 REVERSE	PF00025	29	29.3.4	golgi,cytosol,plasma membrane	G,C,PM	Likely PD protein	n.a	n.a	n.a	0	0	0	0
AT5G50000.2;AT3G01490.2;AT4G14780.1;AT3G22750.1;AT5G50000.1;AT3G01490.1	AT5G50000	2	1	1	5.8	3.3	3.3	36.613	0.0029701	2.4335	69944000	14	3	-0.329875	NaN	-0.928459	3	0.598583	3.59858	0.799882	0.615385	1.41527	HC	signalling.MAP kinases.putative MAP3K, Raf-like	protein kinase, putative | chr5:20342587-20345133 REVERSE	PF07714	30	30.6.2	plasma membrane	PM	X	n.a	n.a	n.a	0	0	0	0
AT2G40980.1	AT2G40980	4	4	4	10.9	10.9	10.9	69.105	0	10.745	78077000	31	5	-0.88874	NaN	-1.46825	3	0.579513	3.57951	0.798293	0.615385	1.41368	HC	not assigned.unknown	LOCATED IN: plasma membrane; EXPRESSED IN: 22 plant structures; EXPRESSED DURING: 13 growth stages; CONTAINS InterPro DOMAIN/s: Protein kinase-like (InterPro:IPR011009); Has 152 Blast hits to 139 proteins in 56 species: Archae - 0; Bacteria - 74; Metazoa - 0; Fungi - 0; Plants - 60; Viruses - 0; Other Eukaryotes - 18 (source: NCBI BLink). | chr2:17102090-17104802 FORWARD	#N/A	35	35	plasma membrane	PM	X	n.a	n.a	n.a	0	0	0	0
AT4G19420.2;AT4G19420.1;AT4G19420.4;AT4G19420.3	AT4G19420	7	7	7	29.2	29.2	29.2	44.439	0	24.791	551720000	22	19	-0.359101	-0.85081	-0.673833	0.491709	0.314732	0.806441	0.567203	0.846154	1.41336	HC	cell wall.pectin*esterases.acetyl esterase	pectinacetylesterase family protein | chr4:10587166-10590588 REVERSE	PF03283	10	10.8	cytosol,extracellular	C,EX	X	n.a	n.a	n.a	0	0	0	0
AT1G50430.2;AT1G50430.1	AT1G50430	2	2	2	6.5	6.5	6.5	49.404	0	8.7001	226020000	10	13	-0.192876	NaN	-0.767988	3	0.575112	3.57511	0.797926	0.615385	1.41331	HC	hormone metabolism.brassinosteroid.synthesis-degradation.sterols.DWF5	Symbols: DWF5, PA, LE, ST7R, 7RED | DWF5 (DWARF 5); sterol delta7 reductase | chr1:18681932-18685652 REVERSE	PF01222	17	17.3	endoplasmic reticulum,plasma membrane	ER,PM	X	n.a	n.a	n.a	0	0	0	0
AT4G22010.1	AT4G22010	23	23	21	53.6	53.6	48.8	60.455	0	263.39	11090000000	25	202	0.759926	0.0828486	0.640341	0.677077	0.119585	0.796662	0.566389	0.846154	1.41254	HC	misc.oxidases - copper, flavone etc	Symbols: sks4 | sks4 (SKU5 Similar 4); copper ion binding / oxidoreductase | chr4:11663324-11666715 FORWARD	PF00394,PF07731,PF07732	26	26.7	extracellular	EX	X	n.a	n.a	n.a	0	0	0	0
AT1G78490.1;AT1G78490.2	AT1G78490	13	13	13	34.4	34.4	34.4	54.994	0	53.277	1093100000	26	33	-0.197243	-0.547322	-0.640145	0.350079	0.442902	0.792981	0.566082	0.846154	1.41224	HC	misc.cytochrome P450	Symbols: CYP708A3 | CYP708A3; electron carrier/ heme binding / iron ion binding / monooxygenase/ oxygen binding | chr1:29528253-29530665 FORWARD	PF00067	26	26.10	plasma membrane	PM	X	n.a	n.a	n.a	0	0	0	0
AT1G27980.1	AT1G27980	2	2	2	5.7	5.7	5.7	59.477	0	5.7005	117300000	23	8	-0.518164	NaN	-1.07961	3	0.561449	3.56145	0.796787	0.615385	1.41217	HC	lipid metabolism.'exotics' (steroids, squalene etc).sphingolipids	Symbols: DPL1, ATDPL1 | DPL1; carboxy-lyase/ catalytic/ pyridoxal phosphate binding | chr1:9748737-9752769 FORWARD	PF00282	11	11.8	endoplasmic reticulum	ER	X	n.a	n.a	n.a	0	0	0	0
AT3G03520.1;AT3G03520.2	AT3G03520	5	5	5	12.8	12.8	12.8	59.097	0	27	247900000	24	13	-0.415758	NaN	-0.969406	3	0.553648	3.55365	0.796137	0.615385	1.41152	HC	lipid metabolism.lipid degradation.lysophospholipases.phosphoinositide phospholipase C	phosphoesterase family protein | chr3:837877-840624 REVERSE	PF04185	11	11.9	plasma membrane	PM	X	n.a	n.a	n.a	0	0	0	0
AT3G52640.3;AT3G52640.1;AT3G52640.2	AT3G52640	4	4	4	11.2	11.2	11.2	66.713	0	45.273	55610000	29	7	-1.08996	NaN	-1.63657	3	0.54661	3.54661	0.795551	0.615385	1.41094	HC	transport.misc	nicastrin-related | chr3:19514873-19520544 REVERSE	PF18266,PF05450	34	34.99	extracellular,vacuole	EX,V	X	n.a	n.a	n.a	0	0	0	0
AT1G75910.1	AT1G75910	1	1	1	3.8	3.8	3.8	37.911	0.0022501	2.5786	8515700	14	5	-0.574334	-1.11395	NaN	0.539618	3	3.53962	0.794968	0.615385	1.41035	HC	development.unspecified	Symbols: EXL4 | EXL4; acyltransferase/ carboxylesterase/ lipase | chr1:28501434-28503283 FORWARD	PF00657	33	33.99	extracellular	EX	X	n.a	n.a	n.a	0	0	0	0
AT1G18700.3;AT1G18700.6;AT1G18700.1;AT1G18700.2;AT1G18700.4;AT1G18700.5	AT1G18700	3	3	3	4.3	4.3	4.3	78.586	0	7.5977	123160000	40	5	-0.945452	NaN	-1.4765	3	0.531045	3.53104	0.794254	0.615385	1.40964	HC	stress.abiotic.heat	DNAJ heat shock N-terminal domain-containing protein | chr1:6437531-6444076 FORWARD	PF00226	20	20.2	endoplasmic reticulum,plasma membrane	ER,PM	X	n.a	n.a	n.a	0	0	0	0
AT4G36700.1	AT4G36700	3	3	3	8.6	8.6	8.6	59.084	0	13.159	48233000	16	14	-0.00149781	-0.527356	NaN	0.525858	3	3.52586	0.793822	0.615385	1.40921	HC	not assigned.no ontology	cupin family protein | chr4:17298200-17300367 REVERSE	PF00190	35	35	extracellular	EX	X	n.a	n.a	n.a	0	0	0	0
AT1G13750.1	AT1G13750	8	8	8	14.8	14.8	14.8	68.241	0	18.657	208670000	32	16	-0.662814	-0.685214	-1.39122	0.0224001	0.728403	0.750803	0.562567	0.846154	1.40872	HC	misc.acid and other phosphatases	calcineurin-like phosphoesterase family protein | chr1:4715394-4718235 REVERSE	PF14008,PF00149,PF16656,PF17808	26	26.13	extracellular	EX	Likely PD protein	n.a	n.a	n.a	0	0	0	0
AT2G03120.1	AT2G03120	3	3	3	11.3	11.3	11.3	38.339	0	45.508	449240000	16	19	0.0241557	NaN	-0.482625	3	0.50678	3.50678	0.792232	0.615385	1.40762	HC	protein.degradation	Symbols: ATSPP | ATSPP (ARABIDOPSIS SIGNAL PEPTIDE PEPTIDASE); aspartic-type endopeptidase | chr2:937420-940339 FORWARD	PF04258	29	29.5	endoplasmic reticulum	ER	X	n.a	n.a	n.a	0	0	0	0
AT5G64260.1	AT5G64260	11	9	9	29.8	23.3	23.3	32.674	0	54.176	3305100000	11	54	0.360519	-0.161119	0.14626	0.521637	0.214259	0.735897	0.561325	0.846154	1.40748	HC	signalling.in sugar and nutrient physiology	Symbols: EXL2 | EXL2 (EXORDIUM LIKE 2) | chr5:25703929-25705316 FORWARD	PF04674	30	30.1	extracellular	EX	Likely PD protein	n.a	n.a	n.a	0	0	0	0
AT5G51950.2;AT5G51950.3;AT5G51950.1	AT5G51950	11	11	10	26.3	26.3	24.9	60.631	0	47.746	454430000	25	30	-0.252059	0.108393	-1.34461	-0.360452	1.09255	0.732096	0.561008	0.846154	1.40716	HC	misc.nitrilases, *nitrile lyases, berberine bridge enzymes, reticuline oxidases, troponine reductases	glucose-methanol-choline (GMC) oxidoreductase family protein | chr5:21105909-21108605 REVERSE	PF05199,PF00732	26	26.8	extracellular	EX	X	n.a	n.a	n.a	0	0	0	0
AT1G17620.1	AT1G17620	3	3	3	15.2	15.2	15.2	28.288	0	6.6248	489280000	13	21	0.281372	NaN	-0.211663	3	0.493035	3.49304	0.791086	0.615385	1.40647	HC	not assigned.unknown	FUNCTIONS IN: molecular_function unknown; INVOLVED IN: biological_process unknown; LOCATED IN: plasma membrane; EXPRESSED IN: 23 plant structures; EXPRESSED DURING: 13 growth stages; CONTAINS InterPro DOMAIN/s: Harpin-induced 1 (InterPro:IPR010847); BEST Arabidopsis thaliana protein match is: unknown protein (TAIR:AT5G11890.1); Has 539 Blast hits to 538 proteins in 22 species: Archae - 0; Bacteri…	PF03168	35	35	plasma membrane	PM	X	n.a	n.a	n.a	0	0	0	0
AT3G21250.6;AT3G21250.3;AT3G21250.1;AT3G21250.5;AT3G21250.2;AT3G21250.4	AT3G21250	1	1	1	0.9	0.9	0.9	116.11	0.0029729	2.4407	23624000	53	5	-1.58271	NaN	-2.07528	3	0.492572	3.49257	0.791048	0.615385	1.40643	HC	transport.ABC transporters and multidrug resistance systems	Symbols: ATMRP6, MRP6 | ATMRP6; ATPase, coupled to transmembrane movement of substances | chr3:7457433-7462734 REVERSE	PF00005,PF00005,PF00664,PF00664	34	34.16	vacuole,plasma membrane	V,PM	X	n.a	n.a	n.a	0	0	0	0
AT1G04780.1	AT1G04780	2	2	2	3.3	3.3	3.3	74.359	0	4.8715	104170000	38	8	-1.01128	NaN	-1.48833	3	0.477048	3.47705	0.789754	0.615385	1.40514	HC	cell.organisation	ankyrin repeat family protein | chr1:1340669-1343584 REVERSE	PF11904	31	31.1	plasma membrane	PM	X	n.a	n.a	n.a	0	0	0	0
AT5G61240.1;AT5G61240.2	AT5G61240	4	4	4	13.2	13.2	13.2	36.795	0	5.6554	108940000	17	4	-0.595828	NaN	-1.06724	3	0.471407	3.47141	0.789284	0.615385	1.40467	HC	stress.biotic	protein binding | chr5:24629280-24632211 FORWARD	PF00560,PF08263,PF13855,PF13855	20	20.1	golgi,extracellular	G,EX	X	n.a	n.a	n.a	0	0	0	0
AT1G43910.1;AT4G05380.1;AT5G17760.1;AT3G50940.1;AT5G17730.1;AT2G18193.1;AT5G17740.1	AT1G43910	4	3	2	8.8	6.3	4.2	54.237	0	5.2634	42934000	30	3	-1.24111	NaN	-1.68342	3	0.442313	3.44231	0.786859	0.615385	1.40224	HC	protein.degradation.AAA type	AAA-type ATPase family protein | chr1:16655884-16657658 REVERSE	PF00004,PF14363	29	29.5.9	endoplasmic reticulum	ER	X	n.a	n.a	n.a	0	0	0	0
AT2G39310.4;AT2G39310.3;AT2G39310.1;AT2G39310.2	AT2G39310	13	9	9	36	28.4	28.4	50.462	0	35.754	4023500000	26	43	0.0274059	-0.345689	-0.267063	0.373095	0.294469	0.667563	0.55563	0.846154	1.40178	HC	misc.myrosinases-lectin-jacalin	Symbols: JAL22 | JAL22 (JACALIN-RELATED LECTIN 22) | chr2:16414073-16416815 REVERSE	PF01419,PF01419,PF01419	26	26.16	plasma membrane,cytosol	PM,C	X	n.a	n.a	n.a	0	0	0	0
AT4G27120.1;AT4G27120.2;AT4G27120.3	AT4G27120	2	2	2	7.7	7.7	7.7	34.018	0.0002028	3.867	73640000	14	4	-0.335146	-0.770449	NaN	0.435303	3	3.4353	0.786275	0.615385	1.40166	HC	not assigned.unknown	unknown protein | chr4:13601970-13604339 REVERSE	PF09756	35	35	endoplasmic reticulum,extracellular	ER,EX	X	n.a	n.a	n.a	0	0	0	0
AT1G21900.1	AT1G21900	3	3	3	9.7	9.7	9.7	24.346	0	8.2463	96412000	6	5	0.0271086	NaN	-0.406125	3	0.433234	3.43323	0.786103	0.615385	1.40149	HC	transport.misc	emp24/gp25L/p24 family protein | chr1:7690802-7692438 REVERSE	PF01105	34	34.99	endoplasmic reticulum	ER	X	n.a	n.a	n.a	0	0	0	0
AT1G04120.3;AT1G04120.2;AT1G04120.1;AT3G60970.1;AT3G60160.2;AT3G60160.3;AT3G60160.1	AT1G04120	2	2	2	1.1	1.1	1.1	164.6	0.0058087	2.1774	139190000	71	4	-1.32277	NaN	-1.74311	3	0.420347	3.42035	0.785029	0.615385	1.40041	HC	transport.ABC transporters and multidrug resistance systems	Symbols: ATMRP5, MRP5 | ATMRP5; ATPase, coupled to transmembrane movement of substances / sulfonylurea receptor | chr1:1064454-1070927 REVERSE	PF00005,PF00005,PF00664,PF00664	34	34.16	vacuole,plasma membrane	V,PM	X	n.a	n.a	n.a	0	0	0	0
AT2G22970.4;AT2G22970.1;AT2G22970.3	AT2G22970	5	5	5	21.5	21.5	21.5	46.933	0	23.983	258890000	19	11	-0.593366	NaN	-1.0003	3	0.406934	3.40693	0.783911	0.615385	1.3993	HC	protein.degradation.serine protease	Symbols: SCPL11 | serine carboxypeptidase S10 family protein | chr2:9774853-9778512 FORWARD	PF00450	29	29.5.5	extracellular	EX	X	n.a	n.a	n.a	0	0	0	0
AT1G05760.1;AT1G05760.2	AT1G05760	2	2	2	12.1	12.1	12.1	19.199	0	7.8149	37151000	5	6	-0.505371	NaN	-0.909137	3	0.403765	3.40377	0.783647	0.615385	1.39903	HC	stress.biotic	Symbols: RTM1 | RTM1 (restricted tev movement 1); sugar binding | chr1:1723734-1724486 REVERSE	PF01419	20	20.1	plasma membrane	PM	X	n.a	n.a	n.a	0	0	0	0
AT1G70280.1;AT1G70280.2	AT1G70280	5	5	5	19	19	19	50.301	0	9.1298	115550000	23	11	-0.765795	-1.16323	NaN	0.397438	3	3.39744	0.78312	0.615385	1.3985	HC	not assigned.no ontology	NHL repeat-containing protein | chr1:26465893-26468706 REVERSE	PF01436	35	35	nucleus,plasma membrane	N,PM	X	n.a	n.a	n.a	0	0	0	0
AT3G59010.1	AT3G59010	16	16	13	37.8	37.8	33.3	57.513	0	299.24	6329200000	26	147	0.304018	-0.219564	0.200083	0.523582	0.103935	0.627517	0.552293	0.846154	1.39845	HC	cell wall.pectin*esterases.misc	pectinesterase family protein | chr3:21802805-21805214 REVERSE	PF01095,PF04043	10	10.8	extracellular	EX	X	n.a	n.a	n.a	0	0	0	0
AT1G76020.3;AT1G76020.1;AT1G76020.2	AT1G76020	3	3	3	33.7	33.7	33.7	19.998	0	45.84	785190000	10	18	0.11465	NaN	-0.274743	3	0.389393	3.38939	0.782449	0.615385	1.39783	HC	not assigned.unknown	INVOLVED IN: biological_process unknown; LOCATED IN: cell wall, vacuole; EXPRESSED IN: 22 plant structures; EXPRESSED DURING: 13 growth stages; CONTAINS InterPro DOMAIN/s: Thioredoxin fold (InterPro:IPR012335), Thioredoxin-like fold (InterPro:IPR012336); BEST Arabidopsis thaliana protein match is: unknown protein (TAIR:AT1G20225.1); Has 118 Blast hits to 116 proteins in 37 species: Archae - 0; Ba…	PF13462	35	35	extracellular	EX	X	n.a	n.a	n.a	0	0	0	0
AT3G47700.1	AT3G47700	3	3	3	4.4	4.4	4.4	90.232	0	4.4625	137530000	46	4	-1.1592	NaN	-1.54544	3	0.386233	3.38623	0.782186	0.615385	1.39757	HC	protein.targeting.secretory pathway.vacuole	Symbols: MAG2 | MAG2 (maigo2) | chr3:17583601-17586624 REVERSE	PF04437	29	29.3.4	endoplasmic reticulum	ER	X	n.a	n.a	n.a	0	0	0	0
AT3G52470.1	AT3G52470	6	5	5	36.5	31.2	31.2	23.098	0	92.516	4382500000	10	61	0.919866	0.53591	NaN	0.383956	3	3.38396	0.781996	0.615385	1.39738	HC	not assigned.no ontology	harpin-induced family protein / HIN1 family protein / harpin-responsive family protein | chr3:19450649-19451982 FORWARD	PF03168	35	35	plasma membrane	PM	X	n.a	n.a	n.a	0	0	0	0
AT3G43270.1	AT3G43270	8	5	5	21.1	15.2	15.2	57.635	0	5.7729	89939000	21	6	-0.941264	-1.13909	-1.35161	0.197826	0.41035	0.608177	0.550681	0.846154	1.39684	HC	cell wall.pectin*esterases.PME	pectinesterase family protein | chr3:15222125-15225460 REVERSE	PF01095,PF04043	10	10.8	extracellular	EX	X	n.a	n.a	n.a	0	0	0	0
AT4G13510.1	AT4G13510	1	1	1	2.8	2.8	2.8	53.576	0	6.4721	74532000	10	4	-0.22003	NaN	-0.590618	3	0.370588	3.37059	0.780882	0.615385	1.39627	HC	transport.ammonium	Symbols: AMT1;1, ATAMT1, ATAMT1;1 | AMT1;1 (AMMONIUM TRANSPORTER 1;1); ammonium transmembrane transporter | chr4:7858183-7859918 FORWARD	PF00909	34	34.5	plasma membrane	PM	X	n.a	n.a	n.a	0	0	0	0
AT5G47910.1	AT5G47910	2	2	2	3	3	3	103.91	0	5.6241	74349000	50	2	-1.25303	NaN	-1.61249	3	0.359465	3.35947	0.779955	0.615385	1.39534	HC	stress.biotic.respiratory burst	Symbols: RBOHD, ATRBOHD | RBOHD (RESPIRATORY BURST OXIDASE HOMOLOGUE D); NAD(P)H oxidase | chr5:19397443-19402061 FORWARD	PF01794,PF08022,PF08030,PF08414	20	20.1	plasma membrane	PM	X	n.a	n.a	n.a	0	0	0	0
AT5G06120.9;AT5G06120.8;AT5G06120.7;AT5G06120.10;AT5G06120.6;AT5G06120.3;AT5G06120.2;AT5G06120.4;AT5G06120.5;AT5G06120.1	AT5G06120	4	4	4	4.7	4.7	4.7	119.55	0	6.028	605390000	63	7	-0.376669	NaN	-1.65902	3	1.28235	4.28235	0.856862	0.538462	1.39532	HC	signalling.G-proteins	Ran-binding protein, putative | chr5:1844078-1852601 FORWARD	PF03810	30	30.5	golgi,nucleus	G,N	X	n.a	XPO7	importin-beta	0	0	0	0
AT4G16370.1	AT4G16370	4	4	4	8.1	8.1	8.1	82.311	0	13.123	241590000	21	14	-0.71445	NaN	-1.07254	3	0.358089	3.35809	0.779841	0.615385	1.39523	HC	transport.peptides and oligopeptides	Symbols: ATOPT3, OPT3 | ATOPT3 (OLIGOPEPTIDE TRANSPORTER); oligopeptide transporter | chr4:9247302-9250091 REVERSE	PF03169	34	34.13	plasma membrane	PM	X	n.a	n.a	n.a	0	0	0	0
AT4G34950.1	AT4G34950	3	2	2	6.3	4.2	4.2	60.861	0	60.2	112840000	16	8	0.0183048	NaN	-0.335564	3	0.353868	3.35387	0.779489	0.615385	1.39487	HC	development.unspecified	nodulin family protein | chr4:16642316-16644818 REVERSE	PF06813	33	33.99	plasma membrane	PM	X	n.a	n.a	n.a	0	0	0	0
AT1G69530.2;AT1G69530.1;AT1G69530.3;AT1G69530.4;AT1G69530.5	AT1G69530	5	5	5	27.6	27.6	27.6	26.517	0	245.68	2332000000	4	38	1.50624	1.56689	0.861028	-0.0606432	0.645216	0.584573	0.548714	0.846154	1.39487	HC	cell wall.modification	Symbols: ATEXPA1, EXP1, AT-EXP1, ATEXP1, ATHEXP ALPHA 1.2 | ATEXPA1 (ARABIDOPSIS THALIANA EXPANSIN A1) | chr1:26141836-26143496 FORWARD	PF01357,PF03330	10	10.7	extracellular	EX	Likely PD protein	n.a	n.a	n.a	0	0	0	0
AT4G33625.1;AT4G33625.3;AT4G33625.2	AT4G33625	3	3	3	16	16	16	22.613	0	33.142	139800000	10	9	-0.293202	NaN	-0.640395	3	0.347193	3.34719	0.778933	0.615385	1.39432	HC	not assigned.unknown	unknown protein | chr4:16152926-16154722 REVERSE	#N/A	35	35	vacuole,plasma membrane	V,PM	X	n.a	n.a	n.a	0	0	0	0
AT2G26510.1;AT2G26510.3;AT2G26510.2	AT2G26510	6	6	6	16.3	16.3	16.3	60.17	0	31.424	213330000	18	14	-0.402892	NaN	-0.7469	3	0.344008	3.34401	0.778667	0.615385	1.39405	HC	transport.misc	Symbols: PDE135 | PDE135 (pigment defective embryo 135); transmembrane transporter | chr2:11273911-11277630 FORWARD	PF00860	34	34.99	plasma membrane	PM	X	n.a	n.a	n.a	0	0	0	0
AT3G12700.1	AT3G12700	3	3	3	7.2	7.2	7.2	50.567	0	4.8691	92546000	18	2	-0.828869	NaN	-1.17284	3	0.343974	3.34397	0.778664	0.615385	1.39405	HC	protein.degradation.aspartate protease	aspartyl protease family protein | chr3:4037070-4039134 FORWARD	PF14541,PF14543	29	29.5.4	extracellular,vacuole	EX,V	X	n.a	n.a	n.a	0	0	0	0
AT1G04110.1	AT1G04110	20	20	20	37.9	37.9	37.9	83.775	0	118.44	1742200000	33	66	-0.298364	-0.640557	NaN	0.342193	3	3.34219	0.778516	0.615385	1.3939	HC	protein.degradation.subtilases	Symbols: SDD1 | SDD1 (STOMATAL DENSITY AND DISTRIBUTION); serine-type endopeptidase | chr1:1061457-1063784 REVERSE	PF17766,PF00082,PF02225,PF05922	29	29.5.1	extracellular	EX	X	n.a	n.a	n.a	0	0	0	0
AT5G20950.2;AT5G20950.1;AT5G20950.3	AT5G20950	39	39	37	51.4	51.4	49.8	67.926	0	323.31	43814000000	22	550	1.56489	1.39385	1.16477	0.171039	0.400122	0.571161	0.547597	0.846154	1.39375	HC	cell wall.degradation.cellulases and beta -1,4-glucanases	glycosyl hydrolase family 3 protein | chr5:7107376-7111349 REVERSE	PF00933,PF01915	10	10.6	extracellular	EX	Likely PD protein	n.a	n.a	n.a	0	0	0	0
AT2G45200.1;AT2G45200.2	AT2G45200	2	2	2	9.2	9.2	9.2	26.47	0.0061461	2.1318	41118000	16	3	-0.861214	NaN	-1.19812	3	0.336905	3.33691	0.778075	0.615385	1.39346	HC	cell.vesicle transport	Symbols: GOS12, ATGOS12 | GOS12 (GOLGI SNARE 12); SNARE binding | chr2:18637503-18639808 REVERSE	PF12352	31	31.4	golgi,cytosol,endoplasmic reticulum	G,C,ER	X	n.a	n.a	n.a	0	0	0	0
AT5G13640.2;AT5G13640.3;AT5G13640.1	AT5G13640	3	3	3	7.4	7.4	7.4	56.518	0	6.1065	82599000	28	8	-0.766931	-1.09308	NaN	0.326145	3	3.32614	0.777179	0.615385	1.39256	HC	lipid metabolism.'exotics' (steroids, squalene etc).phosphatidylcholinesterol O-acyltransferase	Symbols: ATPDAT, PDAT | ATPDAT; phosphatidylcholine-sterol O-acyltransferase | chr5:4393062-4397541 FORWARD	PF02450,PF02450	11	11.8	endoplasmic reticulum	ER	X	n.a	n.a	n.a	0	0	0	0
AT2G21600.1	AT2G21600	3	3	2	17.9	17.9	12.8	22.418	0	6.6417	181430000	8	8	-0.263324	NaN	-0.586442	3	0.323119	3.32312	0.776927	0.615385	1.39231	HC	protein.targeting.secretory pathway.ER	Symbols: ATRER1B | ATRER1B | chr2:9242801-9244833 FORWARD	PF03248	29	38075	endoplasmic reticulum	ER	X	n.a	n.a	n.a	0	0	0	0
AT1G67900.6;AT1G67900.5;AT1G67900.4;AT1G67900.3;AT1G67900.2;AT1G67900.1	AT1G67900	5	5	5	9.2	9.2	9.2	70.314	0	14.784	197880000	36	13	-0.676155	NaN	-1.92192	3	1.24576	4.24576	0.853814	0.538462	1.39228	HC	signalling.light	phototropic-responsive NPH3 family protein | chr1:25467024-25470017 FORWARD	PF03000	30	30.11	nucleus	N	X	n.a	n.a	n.a	0	0	0	0
AT5G38980.1	AT5G38980	2	2	2	34.8	34.8	34.8	10.35	0	4.6171	248230000	3	9	0.857676	NaN	0.542236	3	0.315441	3.31544	0.776287	0.615385	1.39167	HC	not assigned.unknown	unknown protein | chr5:15606771-15607350 FORWARD	#N/A	35	35	extracellular	EX	X	n.a	n.a	n.a	0	0	0	0
AT1G26770.1;AT1G26770.2	AT1G26770	5	3	3	24.9	20.9	20.9	26.427	0	60.489	321770000	6	16	0.378958	0.25731	-0.0455652	0.121648	0.424524	0.546172	0.545514	0.846154	1.39167	HC	cell wall.modification	Symbols: ATEXPA10, AT-EXP10, ATEXP10, ATHEXP ALPHA 1.1, EXP10 | ATEXPA10 (ARABIDOPSIS THALIANA EXPANSIN A 10); structural constituent of cell wall | chr1:9259750-9260792 FORWARD	PF01357,PF03330	10	10.7	extracellular	EX	X	n.a	n.a	n.a	0	0	0	0
AT2G47800.1	AT2G47800	13	5	5	9.6	4.6	4.6	169.08	0	10.934	178410000	67	9	-1.17498	NaN	-1.46868	3	0.293705	3.29371	0.774475	0.615385	1.38986	HC	transport.ABC transporters and multidrug resistance systems	Symbols: ATMRP4, EST3 | ATMRP4 (ARABIDOPSIS THALIANA MULTIDRUG RESISTANCE-ASSOCIATED PROTEIN 4); ATPase, coupled to transmembrane movement of substances / folic acid transporter | chr2:19574864-19580599 FORWARD	PF00005,PF00005,PF00664,PF00664	34	34.16	plasma membrane	PM	X	n.a	n.a	n.a	0	0	0	0
AT3G53520.2;AT3G53520.1;AT3G53520.4;AT3G53520.3	AT3G53520	7	5	5	22.2	14.1	14.1	48.402	0	11.814	290590000	25	7	0.070785	NaN	-1.14317	3	1.21395	4.21395	0.851163	0.538462	1.38962	HC	cell wall.precursor synthesis.UXS	Symbols: UXS1, ATUXS1 | UXS1 (UDP-GLUCURONIC ACID DECARBOXYLASE 1); UDP-glucuronate decarboxylase/ catalytic | chr3:19841484-19844308 FORWARD	PF16363	10	10.1	golgi,peroxisome	G,PX	X	n.a	n.a	n.a	0	0	0	0
AT1G29790.2;AT1G29790.1	AT1G29790	3	3	3	10.6	10.6	10.6	41.955	0	12.231	177310000	20	12	-0.638891	NaN	-0.923224	3	0.284332	3.28433	0.773694	0.615385	1.38908	HC	not assigned.unknown	FUNCTIONS IN: molecular_function unknown; INVOLVED IN: biological_process unknown; LOCATED IN: Golgi apparatus, plasma membrane; EXPRESSED IN: 23 plant structures; EXPRESSED DURING: 12 growth stages; BEST Arabidopsis thaliana protein match is: methyltransferase (TAIR:AT5G40830.2); Has 127 Blast hits to 127 proteins in 12 species: Archae - 0; Bacteria - 0; Metazoa - 0; Fungi - 0; Plants - 127; Vir…	PF03141	35	35	golgi,extracellular	G,EX	X	n.a	n.a	n.a	0	0	0	0
AT5G63180.1	AT5G63180	17	13	13	47.9	32.4	32.4	47.894	0	124.64	1236400000	18	49	-0.0155759	0.519328	-1.0617	-0.534904	1.04613	0.511225	0.542602	0.846154	1.38876	HC	cell wall.degradation.pectate lyases and polygalacturonases	pectate lyase family protein | chr5:25340954-25343119 REVERSE	PF00544	10	10.6	extracellular	EX	X	n.a	n.a	n.a	0	0	0	0
AT5G58710.1	AT5G58710	7	6	5	40.2	36.8	33.3	21.961	0	51.14	4004100000	9	25	1.33013	NaN	1.05092	3	0.27921	3.27921	0.773268	0.615385	1.38865	HC	cell.cycle.peptidylprolyl isomerase	Symbols: ROC7 | ROC7; peptidyl-prolyl cis-trans isomerase | chr5:23717775-23719765 FORWARD	PF00160	31	31.3	endoplasmic reticulum	ER	X	n.a	n.a	n.a	0	0	0	0
AT2G35110.2;AT2G35110.1	AT2G35110	2	2	2	2.4	2.4	2.4	155.75	0	4.954	18511000	67	3	-1.49249	NaN	-1.76855	3	0.27606	3.27606	0.773005	0.615385	1.38839	HC	cell.division	Symbols: GRL, NAP1, NAPP | GRL (GNARLED); transcription activator | chr2:14795715-14803850 REVERSE	PF09735	31	31.2	endoplasmic reticulum,cytosol	ER,C	X	n.a	n.a	n.a	0	0	0	0
AT5G42180.1	AT5G42180	11	10	10	50.2	47.3	47.3	34.705	0	139.58	2383800000	14	57	0.269102	-0.736044	0.770106	1.00515	-0.501004	0.504141	0.542012	0.846154	1.38817	HC	misc.peroxidases	peroxidase 64 (PER64) (P64) (PRXR4) | chr5:16852630-16854224 FORWARD	PF00141	26	26.12	extracellular	EX	X	n.a	n.a	n.a	0	0	0	0
AT4G33360.1;AT4G33360.3;AT4G33360.2	AT4G33360	4	4	4	16	16	16	37.86	0	11.616	171790000	21	6	-0.637103	NaN	-0.90425	3	0.267147	3.26715	0.772262	0.615385	1.38765	HC	secondary metabolism.flavonoids.dihydroflavonols	terpene cyclase/mutase-related | chr4:16067672-16069374 REVERSE	PF01370	16	16.8	endoplasmic reticulum,cytosol,mitochondrion,peroxisome	ER,C,M,PX	X	n.a	n.a	n.a	0	0	0	0
AT5G01930.1	AT5G01930	4	4	4	9.6	9.6	9.6	50.622	0	18.998	124880000	21	16	-0.730323	-0.710696	-1.24414	-0.0196265	0.513822	0.494196	0.541183	0.846154	1.38734	HC	cell wall.degradation.mannan-xylose-arabinose-fucose	(1-4)-beta-mannan endohydrolase, putative | chr5:361081-362901 REVERSE	PF00150	10	10.6	extracellular	EX	X	n.a	n.a	n.a	0	0	0	0
AT4G12980.1	AT4G12980	5	5	5	15.7	15.7	15.7	42.228	0	14.19	120820000	16	15	-0.616369	NaN	-0.875866	3	0.259497	3.2595	0.771625	0.615385	1.38701	HC	hormone metabolism.auxin.induced-regulated-responsive-activated	auxin-responsive protein, putative | chr4:7589395-7591102 REVERSE	PF03188,PF04526	17	17.2	plasma membrane	PM	X	n.a	n.a	n.a	0	0	0	0
AT3G48860.3;AT3G48860.2	AT3G48860	3	3	3	9.5	9.5	9.5	47.544	0	7.615	66430000	23	4	-0.884517	NaN	-1.13073	3	0.24621	3.24621	0.770517	0.615385	1.3859	HC	not assigned.unknown	unknown protein | chr3:18117486-18122093 FORWARD	#N/A	35	35	plasma membrane	PM	X	n.a	n.a	n.a	0	0	0	0
AT5G42100.2;AT5G42100.1	AT5G42100	9	9	9	20.1	20.1	20.1	45.063	0	126.53	12813000000	12	156	1.17164	1.29242	0.575023	-0.120783	0.596617	0.475834	0.539653	0.846154	1.38581	HC	misc.beta 1,3 glucan hydrolases.glucan endo-1,3-beta-glucosidase	Symbols: ATBG_PPAP, ATBG_PAP, BG_PPAP | ATBG_PAP; glucan endo-1,3-beta-D-glucosidase/ hydrolase, hydrolyzing O-glycosyl compounds | chr5:16829151-16831219 REVERSE	PF00332	26	26.4	extracellular	EX	Likely PD protein	n.a	n.a	n.a	0	0	0	0
AT5G60620.1	AT5G60620	2	2	2	12.2	12.2	12.2	43.02	0	50.702	167760000	16	7	-0.754233	NaN	-0.992678	3	0.238445	3.23845	0.76987	0.615385	1.38526	HC	not assigned.no ontology	phospholipid/glycerol acyltransferase family protein | chr5:24367198-24369790 FORWARD	PF01553	35	35	endoplasmic reticulum	ER	X	n.a	n.a	n.a	0	0	0	0
AT4G29520.1	AT4G29520	7	7	7	32.7	32.7	32.7	34.363	0	64.467	739610000	14	36	-0.0370185	NaN	-0.270225	3	0.233207	3.23321	0.769434	0.615385	1.38482	HC	not assigned.unknown	LOCATED IN: endoplasmic reticulum, plasma membrane; EXPRESSED IN: 23 plant structures; EXPRESSED DURING: 13 growth stages; CONTAINS InterPro DOMAIN/s: Saposin B (InterPro:IPR008139); Has 120 Blast hits to 120 proteins in 43 species: Archae - 2; Bacteria - 0; Metazoa - 42; Fungi - 10; Plants - 19; Viruses - 0; Other Eukaryotes - 47 (source: NCBI BLink). | chr4:14493911-14495745 REVERSE	#N/A	35	35	endoplasmic reticulum	ER	X	n.a	n.a	n.a	0	0	0	0
AT5G05670.2;AT5G05670.1	AT5G05670	3	3	2	15	15	11.9	29.075	0	11.891	163660000	12	11	-0.407736	NaN	-0.638053	3	0.230317	3.23032	0.769193	0.615385	1.38458	HC	protein.targeting.secretory pathway.unspecified	signal recognition particle binding | chr5:1695730-1698124 REVERSE	PF09439	29	29.3.4	plasma membrane,endoplasmic reticulum	PM,ER	X	n.a	n.a	n.a	0	0	0	0
AT2G20790.4;AT2G20790.1;AT2G20790.3;AT2G20790.2	AT2G20790	3	3	3	8.8	8.8	8.8	61.641	0	7.5387	40862000	25	1	-1.11614	NaN	-1.34453	3	0.228398	3.2284	0.769033	0.615385	1.38442	HC	cell.vesicle transport	protein binding | chr2:8949928-8952744 REVERSE	PF00928	31	31.4	plasma membrane,cytosol,golgi	PM,C,G	X	n.a	n.a	n.a	0	0	0	0
AT3G07020.1;AT3G07020.2;AT3G07020.3	AT3G07020	4	4	4	8.2	8.2	8.2	69.32	0	12.623	210070000	33	8	-0.817801	NaN	-1.04456	3	0.226762	3.22676	0.768897	0.615385	1.38428	HC	lipid metabolism.'exotics' (steroids, squalene etc).UDP-glucose:sterol glucosyltransferase	UDP-glucose:sterol glucosyltransferase (UGT80A2) | chr3:2217653-2221702 REVERSE	PF00201,PF03033	11	11.8	plastid,plasma membrane	P,PM	X	n.a	n.a	n.a	0	0	0	0
AT5G45650.2;AT5G45650.1	AT5G45650	2	2	2	4	4	4	85.145	0.0005805	3.0818	40674000	38	4	-0.986589	-1.20511	NaN	0.21852	3	3.21852	0.76821	0.615385	1.38359	HC	protein.degradation.subtilases	subtilase family protein | chr5:18513431-18518868 REVERSE	PF00082,PF17766,PF02225,PF05922	29	29.5.1	extracellular	EX	X	n.a	n.a	n.a	0	0	0	0
AT3G52840.1;AT3G52840.2	AT3G52840	9	6	6	22.4	18.8	18.8	82.014	0	34.917	283980000	38	13	-0.860305	-1.10472	-1.06173	0.244414	0.201425	0.445839	0.537153	0.846154	1.38331	HC	misc.gluco-, galacto- and mannosidases.beta-galactosidase	Symbols: BGAL2 | BGAL2 (beta-galactosidase 2); beta-galactosidase/ catalytic/ cation binding | chr3:19581113-19586299 FORWARD	PF01301,PF17834	26	26.3	extracellular	EX	X	n.a	n.a	n.a	0	0	0	0
AT3G18080.1	AT3G18080	43	43	43	72.9	72.9	72.9	58.983	0	323.31	73214000000	27	629	1.47871	1.27419	1.24381	0.204522	0.234899	0.439422	0.536618	0.846154	1.38277	HC	misc.gluco-, galacto- and mannosidases	Symbols: BGLU44 | BGLU44 (B-S GLUCOSIDASE 44); (R)-amygdalin beta-glucosidase/ 4-methylumbelliferyl-beta-D-glucopyranoside beta-glucosidase/ beta-gentiobiose beta-glucosidase/ cellobiose glucosidase/ esculin beta-glucosidase/ hydrolase, hydrolyzing O-glycosyl compounds | chr3:6191557-6194452 FORWARD	PF00232	26	26.3	extracellular	EX	X	n.a	n.a	n.a	0	0	0	0
AT1G18250.1;AT1G18250.2	AT1G18250	1	1	1	5.3	5.3	5.3	25.906	0.0085409	1.9493	53233000	8	2	-0.322256	NaN	-0.527751	3	0.205495	3.2055	0.767125	0.615385	1.38251	HC	stress.biotic	Symbols: ATLP-1 | ATLP-1 | chr1:6276788-6278150 REVERSE	PF00314	20	20.1	extracellular	EX	X	n.a	n.a	n.a	0	0	0	0
AT1G62290.2;AT1G62290.1;AT1G62290.5	AT1G62290	3	1	1	9	4.1	4.1	55.748	0	4.8772	30151000	23	6	-1.44352	NaN	-1.64899	3	0.205474	3.20547	0.767123	0.615385	1.38251	HC	protein.degradation.aspartate protease	aspartyl protease family protein | chr1:23009911-23013492 REVERSE	PF00026,PF03489,PF05184	29	29.5.4	vacuole,extracellular	V,EX	X	n.a	n.a	n.a	0	0	0	0
AT2G44210.1;AT2G44210.2	AT2G44210	3	3	3	7.5	7.5	7.5	46.527	0	14.057	279420000	11	5	-0.0707898	NaN	-0.270148	3	0.199358	3.19936	0.766613	0.615385	1.382	HC	not assigned.unknown	unknown protein | chr2:18280623-18282876 FORWARD	PF03080,PF14365	35	35	extracellular	EX	X	n.a	n.a	n.a	0	0	0	0
AT1G74210.1	AT1G74210	7	7	7	25.8	25.8	25.8	45.021	0	57.178	652480000	18	32	0.0632915	NaN	-0.127875	3	0.191166	3.19117	0.765931	0.615385	1.38132	HC	lipid metabolism.lipid degradation.lysophospholipases.glycerophosphodiester phosphodiesterase	glycerophosphoryl diester phosphodiesterase family protein | chr1:27910314-27912941 FORWARD	PF03009	11	11.9	extracellular	EX	X	n.a	n.a	n.a	0	0	0	0
AT4G36750.1	AT4G36750	3	3	3	19.8	19.8	19.8	28.754	0	45.176	134230000	11	21	-0.611051	NaN	-0.801734	3	0.190684	3.19068	0.76589	0.615385	1.38127	HC	lipid metabolism.'exotics'(steroids, squalene etc)	quinone reductase family protein | chr4:17324571-17326457 FORWARD	PF03358	11	11.8	plasma membrane	PM	X	n.a	n.a	n.a	0	0	0	0
AT1G33490.3;AT1G33490.1	AT1G33490	1	1	1	7.2	7.2	7.2	14.841	0.0013308	2.7768	189340000	5	8	0.124394	NaN	-0.0649004	3	0.189294	3.18929	0.765775	0.615385	1.38116	HC	not assigned.unknown	unknown protein | chr1:12150690-12152394 REVERSE	PF09835	35	35	endoplasmic reticulum	ER	X	n.a	n.a	n.a	0	0	0	0
AT1G52600.1	AT1G52600	2	2	2	12.2	12.2	12.2	20.021	0	4.3704	184060000	11	5	-0.104596	NaN	-0.290517	3	0.18592	3.18592	0.765493	0.615385	1.38088	HC	protein.targeting.secretory pathway.unspecified	signal peptidase, putative | chr1:19590487-19592695 FORWARD	PF00717	29	29.3.4	endoplasmic reticulum	ER	X	n.a	n.a	n.a	0	0	0	0
AT2G37640.2;AT2G37640.1	AT2G37640	6	4	4	28.3	24.1	24.1	26.214	0	202.78	532860000	8	27	0.167027	0.438137	-0.51836	-0.271109	0.685387	0.414278	0.534523	0.846154	1.38068	HC	cell wall.modification	Symbols: ATEXPA3, ATEXP3, ATHEXP ALPHA 1.9, EXP3 | EXP3 | chr2:15787705-15789853 REVERSE	PF01357,PF03330	10	10.7	extracellular	EX	X	n.a	n.a	n.a	0	0	0	0
AT1G30700.1	AT1G30700	2	2	2	3.4	3.4	3.4	59.513	0.0005814	3.0994	72854000	32	3	-1.01843	-0.984813	-1.46623	-0.0336202	0.447798	0.414177	0.534515	0.846154	1.38067	HC	misc.nitrilases, *nitrile lyases, berberine bridge enzymes, reticuline oxidases, troponine reductases	FAD-binding domain-containing protein | chr1:10892570-10894572 FORWARD	PF01565,PF08031	26	26.8	extracellular	EX	X	n.a	n.a	n.a	0	0	0	0
AT2G32810.2;AT2G32810.1	AT2G32810	25	24	24	38.4	37.6	37.6	96.513	0	194.35	2149600000	49	81	-0.603396	-1.05006	-0.567982	0.446661	-0.0354147	0.411246	0.534271	0.846154	1.38042	HC	misc.gluco-, galacto- and mannosidases.beta-galactosidase	Symbols: BGAL9 | BGAL9 (Beta galactosidase 9); beta-galactosidase/ catalytic/ cation binding / sugar binding | chr2:13919127-13925350 REVERSE	PF02140,PF01301,PF17834	26	26.3	vacuole,extracellular	V,EX	X	n.a	n.a	n.a	0	0	0	0
AT5G03540.1;AT5G03540.3;AT5G03540.2	AT5G03540	12	12	12	23.5	23.5	23.5	72.298	0	44.901	545330000	36	17	-0.893306	NaN	-1.07348	3	0.180174	3.18017	0.765015	0.615385	1.3804	HC	cell.vesicle transport	Symbols: ATEXO70A1 | ATEXO70A1 (exocyst subunit EXO70 family protein A1); protein binding | chr5:889566-894167 FORWARD	PF03081	31	31.4	plasma membrane,cytosol	PM,C	X	n.a	n.a	n.a	0	0	0	0
AT5G67385.5;AT5G67385.4;AT5G67385.3;AT5G67385.2;AT5G67385.1	AT5G67385	6	6	6	17.4	17.4	17.4	62.595	0	28.689	255360000	30	13	-0.772603	-0.863424	-1.08812	0.0908217	0.315521	0.406343	0.533862	0.846154	1.38002	HC	signalling.light	protein binding / signal transducer | chr5:26884664-26887204 FORWARD	PF03000	30	30.11	plasma membrane	PM	X	n.a	n.a	n.a	0	0	0	0
AT3G62150.3;AT3G62150.2;AT2G47000.7;AT2G47000.3;AT2G47000.4;AT2G47000.2;AT3G62150.1;AT2G47000.1;AT2G47000.5;AT2G47000.6;AT5G46540.1;AT1G02530.1;AT4G18050.2;AT4G18050.1;AT4G01820.1	AT3G62150	3	1	1	3.2	1.3	1.3	140.33	0	19.31	113750000	58	4	-1.22387	NaN	-1.38175	3	0.157874	3.15787	0.763156	0.615385	1.37854	HC	transport.ABC transporters and multidrug resistance systems	Symbols: PGP21 | PGP21 (P-GLYCOPROTEIN 21); ATPase, coupled to transmembrane movement of substances | chr3:23008755-23013579 REVERSE	PF00005,PF00005,PF00664,PF00664	34	34.16	plasma membrane	PM	X	n.a	n.a	n.a	0	0	0	0
AT1G27480.1	AT1G27480	2	2	2	7.2	7.2	7.2	48.307	0	5.2486	94152000	21	2	-0.868474	NaN	-1.02447	3	0.156	3.156	0.763	0.615385	1.37838	HC	lipid metabolism.'exotics' (steroids, squalene etc).phosphatidylcholinesterol O-acyltransferase	lecithin:cholesterol acyltransferase family protein / LACT family protein | chr1:9544514-9546285 FORWARD	PF02450	11	11.8	plasma membrane,vacuole	PM,V	X	n.a	n.a	n.a	0	0	0	0
AT3G51460.1	AT3G51460	7	7	7	13.7	13.7	13.7	68.237	0	16.307	400690000	36	22	-0.895519	NaN	-1.05123	3	0.155707	3.15571	0.762976	0.615385	1.37836	HC	lipid metabolism.lipid degradation.lysophospholipases.phosphoinositide phospholipase C	Symbols: RHD4 | RHD4 (ROOT HAIR DEFECTIVE4); phosphatidylinositol-4,5-bisphosphate 5-phosphatase/ phosphatidylinositol-4-phosphate phosphatase | chr3:19092518-19097353 FORWARD	PF02383	11	11.9	endoplasmic reticulum	ER	X	n.a	n.a	n.a	0	0	0	0
AT3G54200.1	AT3G54200	2	2	2	15.3	15.3	15.3	25.784	0	7.9416	120830000	13	13	-0.706354	NaN	-0.856315	3	0.149962	3.14996	0.762497	0.615385	1.37788	HC	not assigned.no ontology	FUNCTIONS IN: molecular_function unknown; INVOLVED IN: biological_process unknown; LOCATED IN: anchored to plasma membrane, plasma membrane; EXPRESSED IN: 23 plant structures; EXPRESSED DURING: 14 growth stages; CONTAINS InterPro DOMAIN/s: Harpin-induced 1 (InterPro:IPR010847); BEST Arabidopsis thaliana protein match is: unknown protein (TAIR:AT3G05975.1); Has 405 Blast hits to 404 proteins in 16…	PF03168	35	35	plasma membrane	PM	X	n.a	n.a	n.a	0	0	0	0
AT4G36430.1	AT4G36430	11	11	8	39	39	32	36.164	0	112.74	712420000	15	26	-0.221061	-0.174365	-0.648077	-0.046696	0.427016	0.38032	0.531693	0.846154	1.37785	HC	misc.peroxidases	peroxidase, putative | chr4:17204478-17205966 REVERSE	PF00141	26	26.12	extracellular	EX	X	n.a	n.a	n.a	0	0	0	0
AT3G02880.1	AT3G02880	22	22	15	44.2	44.2	34.8	67.752	0	137.1	2924600000	38	107	-0.0416951	-0.634021	0.184063	0.592325	-0.225758	0.366567	0.530547	0.846154	1.3767	HC	signalling.receptor kinases.leucine rich repeat III	leucine-rich repeat transmembrane protein kinase, putative | chr3:634653-637284 FORWARD	PF00069,PF08263,PF13855	30	30.2	plasma membrane	PM	Likely PD protein	n.a	n.a	n.a	0	0	0	0
AT5G66400.2;AT5G66400.1	AT5G66400	1	1	1	6.5	6.5	6.5	18.334	0	4.4807	728430000	4	13	0.488553	NaN	0.355316	3	0.133238	3.13324	0.761103	0.615385	1.37649	HC	stress.abiotic.unspecified	Symbols: RAB18, ATDI8 | RAB18 (RESPONSIVE TO ABA 18) | chr5:26518297-26519242 REVERSE	PF00257	20	20.2	nucleus,cytosol,plasma membrane	N,C,PM	X	n.a	n.a	n.a	0	0	0	0
AT1G42480.1;AT1G42480.3;AT1G42480.2	AT1G42480	4	4	4	23.6	23.6	23.6	20.568	0	28.234	898410000	9	19	0.422544	NaN	0.291887	3	0.130658	3.13066	0.760888	0.615385	1.37627	HC	not assigned.unknown	unknown protein | chr1:15936230-15938863 FORWARD	PF11938	35	35	endoplasmic reticulum,extracellular	ER,EX	X	n.a	n.a	n.a	0	0	0	0
AT3G51740.1	AT3G51740	2	2	2	3.3	3.3	3.3	90.26	0.003881	2.3621	131180000	37	1	-1.03333	NaN	-1.1639	3	0.130571	3.13057	0.760881	0.615385	1.37627	HC	signalling.receptor kinases.leucine rich repeat III	Symbols: IMK2 | IMK2 (INFLORESCENCE MERISTEM RECEPTOR-LIKE KINASE 2); ATP binding / kinase/ protein kinase/ protein serine/threonine kinase | chr3:19189049-19192051 FORWARD	PF07714,PF08263,PF13855,PF13855	30	30.2	plasma membrane	PM	Likely PD protein	n.a	n.a	n.a	0	0	0	0
AT3G07980.3;AT3G07980.2;AT3G07980.1;AT3G13530.1	AT3G07980	3	3	3	3	3	3	130.47	0.00019944	3.5563	110160000	57	4	-1.14711	NaN	-2.20025	3	1.05314	4.05314	0.837762	0.538462	1.37622	HC	signalling.MAP kinases.MAP3K, ste-like	Symbols: MAPKKK6, MAP3KE2 | MAPKKK6; ATP binding / binding / kinase/ protein kinase/ protein serine/threonine kinase/ protein tyrosine kinase | chr3:2543616-2551225 REVERSE	PF00069	30	30.6.1	cytosol	C	X	n.a	n.a	n.a	0	0	0	0
AT3G52370.1;AT3G52370.2	AT3G52370	8	8	3	25.9	25.9	5	48.072	0	134.44	3331100000	19	62	0.00662362	0.0910552	-0.431535	-0.0844316	0.438159	0.353727	0.529477	0.846154	1.37563	HC	cell wall.cell wall proteins.AGPs.AGP	Symbols: FLA15 | FLA15 (FASCICLIN-LIKE ARABINOGALACTAN PROTEIN 15 PRECURSOR) | chr3:19417490-19419782 FORWARD	PF02469,PF02469	10	10.5	extracellular	EX	X	n.a	n.a	n.a	0	0	0	0
AT1G76850.1	AT1G76850	7	7	5	9.4	9.4	6.5	121.9	0	22.544	291840000	61	16	-1.47302	NaN	-1.58862	3	0.115603	3.1156	0.759634	0.615385	1.37502	HC	not assigned.unknown	Symbols: SEC5A | SEC5A (EXOCYST COMPLEX COMPONENT SEC5) | chr1:28847951-28854499 FORWARD	PF15469	35	35	plasma membrane	PM	X	n.a	n.a	n.a	0	0	0	0
AT3G23450.4;AT3G23450.3;AT3G23450.2;AT3G23450.1	AT3G23450	8	8	8	73.1	73.1	73.1	33.357	0	37.014	22843000000	29	75	1.44929	0.445474	-0.660338	1.00382	2.10963	3.11345	0.759454	0.615385	1.37484	HC	not assigned.unknown	unknown protein | chr3:8410433-8412193 FORWARD	#N/A	35	35	extracellular	EX	X	n.a	n.a	n.a	0	0	0	0
AT2G15780.1	AT2G15780	4	4	4	17.1	17.1	17.1	27.4	0	6.5901	571360000	10	8	-0.0137765	NaN	-0.124409	3	0.110632	3.11063	0.759219	0.615385	1.3746	HC	not assigned.no ontology.glycine rich proteins	glycine-rich protein | chr2:6873545-6874741 REVERSE	PF02298	35	35	extracellular	EX	X	n.a	n.a	n.a	0	0	0	0
AT1G51500.1	AT1G51500	3	3	2	4.7	4.7	3.2	76.45	0.00020354	3.9156	38975000	34	6	-0.992211	-1.10111	NaN	0.108904	3	3.1089	0.759075	0.615385	1.37446	HC	transport.ABC transporters and multidrug resistance systems	Symbols: CER5, D3, ABCG12, WBC12, ATWBC12 | CER5 (ECERIFERUM 5); ATPase, coupled to transmembrane movement of substances | chr1:19097797-19101080 REVERSE	PF19055,PF01061,PF00005	34	34.16	plasma membrane	PM	X	n.a	n.a	n.a	0	0	0	0
AT2G14610.1	AT2G14610	2	2	2	12.4	12.4	12.4	17.677	0	4.8622	220200000	8	13	-0.072112	NaN	-0.167524	3	0.095412	3.09541	0.757951	0.615385	1.37334	HC	stress.biotic	Symbols: PR1, PR 1, ATPR1 | PR1 (PATHOGENESIS-RELATED GENE 1) | chr2:6241704-6242463 REVERSE	PF00188	20	20.1	extracellular	EX	X	n.a	n.a	n.a	0	0	0	0
AT4G36220.1	AT4G36220	3	3	3	8.5	8.5	8.5	58.72	0	12.603	117620000	31	8	-1.25647	NaN	-1.35066	3	0.0941849	3.09418	0.757849	0.615385	1.37323	HC	secondary metabolism.phenylpropanoids.lignin biosynthesis.F5H	Symbols: FAH1, CYP84A1 | FAH1 (FERULIC ACID 5-HYDROXYLASE 1); ferulate 5-hydroxylase/ monooxygenase | chr4:17137344-17139635 REVERSE	PF00067	16	16.2	endoplasmic reticulum	ER	X	n.a	n.a	n.a	0	0	0	0
AT1G66280.1	AT1G66280	11	6	5	24	19.1	19.1	59.78	0	22.339	2833300000	25	37	-0.555479	-0.90161	-0.529453	0.346131	-0.0260257	0.320105	0.526675	0.846154	1.37283	HC	misc.gluco-, galacto- and mannosidases	Symbols: BGLU22 | BGLU22; catalytic/ cation binding / hydrolase, hydrolyzing O-glycosyl compounds | chr1:24706512-24709785 REVERSE	PF00232	26	26.3	endoplasmic reticulum	ER	X	n.a	n.a	n.a	0	0	0	0
AT4G38550.5;AT4G38550.4;AT4G38550.3;AT4G38550.1;AT4G38550.2	AT4G38550	5	5	5	16.8	16.8	16.8	58.313	0	60.895	186630000	26	20	-0.929933	NaN	-1.01498	3	0.0850491	3.08505	0.757087	0.615385	1.37247	HC	not assigned.unknown	LOCATED IN: chloroplast; EXPRESSED IN: 21 plant structures; EXPRESSED DURING: 13 growth stages; CONTAINS InterPro DOMAIN/s: Phospholipase-like, arabidopsis (InterPro:IPR007942); BEST Arabidopsis thaliana protein match is: unknown protein (TAIR:AT2G20950.1); Has 2527 Blast hits to 1973 proteins in 273 species: Archae - 3; Bacteria - 103; Metazoa - 1039; Fungi - 619; Plants - 503; Viruses - 44; Oth…	PF05278	35	35	plasma membrane	PM	X	n.a	n.a	n.a	0	0	0	0
AT4G32640.2;AT4G32640.1	AT4G32640	8	5	5	10.7	8	8	116.32	0	14.823	277590000	44	11	-1.07562	NaN	-1.15306	3	0.077435	3.07743	0.756453	0.615385	1.37184	HC	cell.vesicle transport	protein binding / zinc ion binding | chr4:15742032-15750862 FORWARD	PF00626,PF04810,PF04811,PF04815	31	31.4	endoplasmic reticulum,plastid	ER,P	Likely PD protein	n.a	n.a	n.a	0	0	0	0
AT2G34700.1	AT2G34700	1	1	1	10.9	10.9	10.9	18.833	0	25.677	139480000	9	7	0.56759	0.49681	NaN	0.0707797	3	3.07078	0.755898	0.615385	1.37128	HC	stress.abiotic.unspecified	pollen Ole e 1 allergen and extensin family protein | chr2:14634134-14635627 REVERSE	PF01190	20	20.2	extracellular	EX	X	n.a	n.a	n.a	0	0	0	0
AT3G17520.1	AT3G17520	15	15	15	43.3	43.3	43.3	32.559	0	128.1	2213700000	15	61	-0.0933522	NaN	-0.1581	3	0.0647474	3.06475	0.755396	0.615385	1.37078	HC	not assigned.no ontology.late embryogenesis abundant domain-containing protein	late embryogenesis abundant domain-containing protein / LEA domain-containing protein | chr3:5999289-6000370 REVERSE	#N/A	35	35	extracellular	EX	X	n.a	n.a	n.a	0	0	0	0
AT4G16180.2	AT4G16180	5	5	5	12	12	12	92.368	0	158.11	318420000	39	15	-1.01279	NaN	-1.07258	3	0.0597831	3.05978	0.754982	0.615385	1.37037	HC	not assigned.unknown	unknown protein | chr4:9167891-9170435 REVERSE	#N/A	35	35	endoplasmic reticulum,vacuole	ER,V	X	n.a	n.a	n.a	0	0	0	0
AT1G29050.1	AT1G29050	7	7	7	22.6	22.6	22.6	42.708	0	28.034	173130000	20	14	-0.496307	NaN	-0.553902	3	0.0575945	3.05759	0.7548	0.615385	1.37018	HC	not assigned.unknown	unknown protein | chr1:10136230-10139208 REVERSE	PF13839,PF14416	35	35	extracellular	EX	X	n.a	n.a	n.a	0	0	0	0
AT5G14720.2;AT5G14720.1	AT5G14720	3	3	3	8	8	8	75.363	0	9.7128	100550000	34	5	-0.982567	NaN	-1.03833	3	0.0557582	3.05576	0.754647	0.615385	1.37003	HC	signalling.kinase.cytoplasmatic kinase	protein kinase family protein | chr5:4747860-4753592 REVERSE	PF00069	30	30.30	plasma membrane	PM	X	n.a	n.a	n.a	0	0	0	0
AT4G03550.1	AT4G03550	7	7	6	5	5	4.3	206.91	0	16.552	80752000	92	8	-1.4066	-1.46121	NaN	0.0546036	3	3.0546	0.75455	0.615385	1.36993	HC	minor CHO metabolism.callose	Symbols: ATGSL05, GSL05, ATGSL5, PMR4, GSL5 | ATGSL05 (GLUCAN SYNTHASE-LIKE 5); 1,3-beta-glucan synthase/ transferase, transferring glycosyl groups | chr4:1573348-1579696 FORWARD	PF14288,PF02364	3	3.6	plasma membrane	PM	X	n.a	n.a	n.a	0	0	0	0
AT3G14920.1	AT3G14920	4	4	4	6.1	6.1	6.1	68.995	0	38.038	529690000	21	8	-0.375336	NaN	-0.429905	3	0.0545687	3.05457	0.754547	0.615385	1.36993	HC	not assigned.unknown	unknown protein | chr3:5018275-5020273 FORWARD	PF12222	35	35	extracellular	EX	X	n.a	n.a	n.a	0	0	0	0
AT3G20920.2;AT3G20920.1	AT3G20920	3	3	3	11.3	11.3	11.3	41.815	0	13.425	174310000	18	4	-0.548005	NaN	-0.601938	3	0.0539327	3.05393	0.754494	0.615385	1.36988	HC	not assigned.no ontology	translocation protein-related | chr3:7328576-7330751 REVERSE	PF03839	35	35	endoplasmic reticulum,cytosol	ER,C	X	n.a	n.a	n.a	0	0	0	0
AT1G11680.1	AT1G11680	4	4	4	9.2	9.2	9.2	55.494	0	10.659	62496000	23	6	-1.18692	NaN	-1.23792	3	0.051001	3.051	0.75425	0.615385	1.36963	HC	hormone metabolism.brassinosteroid.synthesis-degradation.sterols.CYP51	Symbols: CYP51G1, EMB1738, CYP51A2, CYP51 | CYP51G1 (CYTOCHROME P450 51G1); oxygen binding / sterol 14-demethylase | chr1:3938501-3940754 FORWARD	PF00067	17	17.3	endoplasmic reticulum	ER	X	n.a	n.a	n.a	0	0	0	0
AT3G02875.1;AT3G02875.3;AT3G02875.2	AT3G02875	4	4	4	13.8	13.8	13.8	48.014	0	22.306	269700000	20	10	-0.639504	NaN	-0.68915	3	0.0496465	3.04965	0.754137	0.615385	1.36952	HC	hormone metabolism.auxin.synthesis-degradation	Symbols: ILR1 | ILR1 (IAA-LEUCINE RESISTANT 1); IAA-Leu conjugate hydrolase/ IAA-Phe conjugate hydrolase/ metallopeptidase | chr3:631913-634074 FORWARD	PF01546,PF07687	17	17.2	endoplasmic reticulum	ER	X	n.a	n.a	n.a	0	0	0	0
AT5G44400.1	AT5G44400	22	22	20	34.5	34.5	32.8	60.345	0	69.829	2788500000	29	72	-0.465552	-0.662487	-0.547431	0.196935	0.0818792	0.278814	0.523234	0.846154	1.36939	HC	misc.nitrilases, *nitrile lyases, berberine bridge enzymes, reticuline oxidases, troponine reductases	FAD-binding domain-containing protein | chr5:17886194-17888480 REVERSE	PF01565,PF08031	26	26.8	extracellular	EX	X	n.a	n.a	n.a	0	0	0	0
AT1G09630.1	AT1G09630	9	9	6	54.4	54.4	41	24.108	0	77.206	1619800000	15	53	0.28277	0.101177	0.186324	0.181592	0.0964453	0.278038	0.52317	0.846154	1.36932	HC	signalling.G-proteins	Symbols: ATRAB11C, ATRABA2A, ATRAB-A2A, RAB-A2A | ATRAB11C (ARABIDOPSIS RAB GTPASE 11C); GTP binding | chr1:3118203-3119708 REVERSE	PF00071	30	30.5	cytosol,plasma membrane	C,PM	X	n.a	n.a	n.a	0	0	0	0
AT1G58170.1;AT3G13650.1	AT1G58170	2	2	2	10.3	10.3	10.3	20.563	0	4.7699	364180000	11	8	0.231385	NaN	0.188736	3	0.0426495	3.04265	0.753554	0.615385	1.36894	HC	stress.biotic.PR-proteins	disease resistance-responsive protein-related / dirigent protein-related | chr1:21536128-21536836 FORWARD	PF03018	20	20.1	extracellular	EX	X	n.a	n.a	n.a	0	0	0	0
AT3G17440.2;AT3G17440.1;AT1G48240.1;AT1G48240.2	AT3G17440	5	5	5	17.1	17.1	17.1	24.537	0	5.1706	210950000	10	7	-0.413221	NaN	-0.450655	3	0.0374337	3.03743	0.753119	0.615385	1.3685	HC	cell.vesicle transport	Symbols: NPSN13, ATNPSN13 | NPSN13 (NOVEL PLANT SNARE 13) | chr3:5969565-5972502 REVERSE	PF12352	31	31.4	plasma membrane,cytosol	PM,C	X	n.a	n.a	n.a	0	0	0	0
AT4G28250.2;AT4G28250.1;AT4G28250.3;AT4G28250.4	AT4G28250	6	6	6	21.3	21.3	21.3	27.702	0	13.746	2041000000	11	44	0.469405	0.281469	0.392118	0.187935	0.0772862	0.265221	0.522102	0.846154	1.36826	HC	cell wall.modification	Symbols: ATEXPB3, EXPB3, ATHEXP BETA 1.6 | ATEXPB3 (ARABIDOPSIS THALIANA EXPANSIN B3) | chr4:14000038-14002069 REVERSE	PF01357,PF03330	10	10.7	extracellular	EX	Likely PD protein	n.a	n.a	n.a	0	0	0	0
AT5G19740.1	AT5G19740	5	5	5	13.1	13.1	13.1	74.738	0	21.847	356100000	33	10	-0.948216	NaN	-0.978057	3	0.0298415	3.02984	0.752487	0.615385	1.36787	HC	protein.degradation	peptidase M28 family protein | chr5:6673933-6676859 FORWARD	PF02225,PF04253,PF04389	29	29.5	extracellular	EX	X	n.a	n.a	n.a	0	0	0	0
AT2G34810.1	AT2G34810	38	38	37	63.9	63.9	62.6	61.306	0	323.31	22331000000	31	310	0.754365	0.6932	0.557545	0.061165	0.196819	0.257984	0.521499	0.846154	1.36765	HC	misc.nitrilases, *nitrile lyases, berberine bridge enzymes, reticuline oxidases, troponine reductases	FAD-binding domain-containing protein | chr2:14685256-14687062 FORWARD	PF01565,PF08031	26	26.8	extracellular	EX	X	n.a	n.a	n.a	0	0	0	0
AT4G18760.1	AT4G18760	4	4	4	13.7	13.7	13.7	46.07	0	10.259	278780000	18	11	-0.628053	NaN	-0.651585	3	0.023532	3.02353	0.751961	0.615385	1.36735	HC	not assigned.no ontology	Symbols: AtRLP51 | AtRLP51 (Receptor Like Protein 51); protein binding | chr4:10308163-10309458 REVERSE	PF13855	35	35	plasma membrane	PM	X	n.a	n.a	n.a	0	0	0	0
AT3G10380.1;AT3G10380.2	AT3G10380	15	15	15	18.5	18.5	18.5	116.6	0	46.413	1135400000	62	58	-0.657483	NaN	-0.669122	3	0.0116384	3.01164	0.75097	0.615385	1.36635	HC	cell.vesicle transport	Symbols: SEC8, ATSEC8 | SEC8 (SUBUNIT OF EXOCYST COMPLEX 8) | chr3:3219523-3228933 REVERSE	PF04048	31	31.4	plasma membrane	PM	X	n.a	n.a	n.a	0	0	0	0
AT3G54820.1	AT3G54820	3	2	2	18.9	15.4	15.4	30.589	0	5.3662	81107000	6	12	0.309942	0.30163	NaN	0.00831182	3	3.00831	0.750693	0.615385	1.36608	HC	transport.Major Intrinsic Proteins.PIP	Symbols: PIP2D, PIP2;5 | PIP2;5 (PLASMA MEMBRANE INTRINSIC PROTEIN 2;5); water channel | chr3:20302021-20304010 FORWARD	PF00230	34	34.19.1	plasma membrane	PM	X	n.a	n.a	n.a	0	0	0	0
AT1G51570.1	AT1G51570	35	35	21	47.7	47.7	29.6	89.153	0	234.32	15466000000	32	264	0.876792	-0.272651	-0.972927	1.14944	1.84972	2.99916	0.74993	0.615385	1.36531	HC	not assigned.no ontology.C2 domain-containing protein	C2 domain-containing protein | chr1:19122170-19124688 REVERSE	PF08372,PF00168,PF00168,PF00168	35	35	endoplasmic reticulum	ER	Likely PD protein	MCTP4	n.a	n.a	0	0	0	0
AT4G04720.2;AT4G04720.1;AT4G21940.1;AT4G21940.2;AT4G21940.3;AT4G04740.7;AT4G04740.6;AT4G04740.5;AT4G04740.4;AT4G04740.3;AT4G04740.1;AT4G04740.2	AT4G04720	6	6	5	14.5	14.5	11.7	59.894	0	12.824	321960000	35	11	-1.16646	-1.35251	-1.20888	0.186051	0.042421	0.228472	0.519039	0.846154	1.36519	HC	signalling.calcium.calcium dependent protein kinases	Symbols: CPK21 | CPK21; ATP binding / calcium ion binding / calmodulin-dependent protein kinase/ kinase/ protein kinase/ protein serine/threonine kinase | chr4:2394458-2397759 REVERSE	PF00069,PF13499,PF13499	30	30.3.1	plasma membrane	PM	X	n.a	n.a	n.a	0	0	0	0
AT2G25070.2;AT2G25070.1	AT2G25070	7	7	7	21.7	21.7	21.7	39.354	0	17.286	427980000	20	14	-0.790073	NaN	-0.785643	3	-0.00443002	2.99557	0.749631	0.615385	1.36502	HC	protein.postranslational modification	protein phosphatase 2C, putative / PP2C, putative | chr2:10663240-10665964 REVERSE	PF00481,PF00481	29	29.4	plasma membrane	PM	X	n.a	n.a	n.a	0	0	0	0
AT2G16630.1	AT2G16630	3	3	3	9.7	9.7	9.7	38.809	0	6.4791	92563000	11	12	-0.16417	-0.155894	NaN	-0.0082756	3	2.99172	0.74931	0.615385	1.36469	HC	not assigned.no ontology.proline rich family	proline-rich family protein | chr2:7209239-7211037 FORWARD	PF01190	35	35	extracellular	EX	X	n.a	n.a	n.a	0	0	0	0
AT5G64110.1	AT5G64110	10	10	10	43.6	43.6	43.6	36.137	0	251.87	2237500000	15	46	0.193578	-0.0204788	0.197209	0.214057	-0.00363012	0.210427	0.517536	0.846154	1.36369	HC	misc.peroxidases	peroxidase, putative | chr5:25654345-25656030 REVERSE	PF00141	26	26.12	extracellular	EX	X	n.a	n.a	n.a	0	0	0	0
AT3G53610.3;AT3G53610.2;AT3G53610.1	AT3G53610	8	2	1	37.5	10.6	5.1	23.939	0.00020145	3.76	77732000	16	7	-0.632225	NaN	-1.52915	3	0.896925	3.89693	0.824744	0.538462	1.36321	HC	signalling.G-proteins	Symbols: ATRAB8, AtRab8B, AtRABE1a | ATRAB8; GTP binding | chr3:19876232-19878519 REVERSE	PF00071	30	30.5	cytosol,golgi	C,G	X	n.a	n.a	n.a	0	0	0	0
AT2G41430.5;AT2G41430.4;AT2G41430.2;AT2G41430.1;AT2G41430.3	AT2G41430	2	2	2	17.8	17.8	17.8	18.411	0	9.7133	224640000	4	9	0.145366	NaN	0.176532	3	-0.0311659	2.96883	0.747403	0.615385	1.36279	HC	stress.abiotic.drought/salt	Symbols: ERD15, LSR1, CID1 | ERD15 (EARLY RESPONSIVE TO DEHYDRATION 15); protein binding | chr2:17269440-17270542 FORWARD	#N/A	20	20.2	mitochondrion,cytosol,plasma membrane	M,C,PM	X	n.a	n.a	n.a	0	0	0	0
AT5G35160.1;AT5G35160.4;AT5G35160.3;AT5G35160.2	AT5G35160	10	7	7	16.7	12.2	12.2	71.427	0	27.457	315350000	21	13	-0.664002	NaN	-0.627765	3	-0.0362362	2.96376	0.74698	0.615385	1.36236	HC	not assigned.unknown	LOCATED IN: integral to membrane, Golgi apparatus; EXPRESSED IN: 24 plant structures; EXPRESSED DURING: 13 growth stages; CONTAINS InterPro DOMAIN/s: Nonaspanin (TM9SF) (InterPro:IPR004240); BEST Arabidopsis thaliana protein match is: unknown protein (TAIR:AT4G12650.1); Has 1053 Blast hits to 1004 proteins in 163 species: Archae - 0; Bacteria - 0; Metazoa - 478; Fungi - 143; Plants - 250; Viruses…	PF02990	35	35	golgi,endoplasmic reticulum	G,ER	X	n.a	n.a	n.a	0	0	0	0
AT5G19320.2;AT5G19320.1	AT5G19320	20	20	19	40.2	40.2	38.5	59.651	0	323.31	7171700000	29	144	0.266537	NaN	-0.618227	3	0.884764	3.88476	0.82373	0.538462	1.36219	HC	signalling.G-proteins	Symbols: RANGAP2 | RANGAP2 (RAN GTPASE ACTIVATING PROTEIN 2); RAN GTPase activator | chr5:6505110-6507435 REVERSE	PF13943,PF13516,PF13516,PF13516,PF13516,PF13516	30	30.5	cytosol,nucleus	C,N	X	n.a	n.a	n.a	0	0	0	0
AT4G24350.1;AT4G24350.3;AT4G24350.2	AT4G24350	6	6	6	25	25	25	36.696	0	15.571	222890000	11	17	-0.300106	NaN	-0.255132	3	-0.0449743	2.95503	0.746252	0.615385	1.36164	HC	not assigned.no ontology	phosphorylase family protein | chr4:12609528-12611468 FORWARD	PF01048	35	35	extracellular,cytosol	EX,C	X	n.a	n.a	n.a	0	0	0	0
AT2G42800.1	AT2G42800	8	8	8	25.8	25.8	25.8	50.8	0	98.059	901860000	23	25	-0.350639	-0.856442	-0.0305269	0.505803	-0.320112	0.185691	0.515474	0.846154	1.36163	HC	cell wall.cell wall proteins.LRR	Symbols: AtRLP29 | AtRLP29 (Receptor Like Protein 29); protein binding | chr2:17807942-17809590 REVERSE	PF00560,PF13855,PF13855	10	10.5	extracellular	EX	X	n.a	n.a	n.a	0	0	0	0
AT1G78820.1	AT1G78820	18	10	10	49.2	31	31	50.594	0	182.24	3321700000	25	89	-0.044548	-0.25228	-0.0221409	0.207732	-0.0224071	0.185325	0.515444	0.846154	1.3616	HC	misc.myrosinases-lectin-jacalin	curculin-like (mannose-binding) lectin family protein / PAN domain-containing protein | chr1:29634124-29635813 REVERSE	PF01453	26	26.16	extracellular	EX	X	n.a	n.a	n.a	0	0	0	0
AT2G39700.1	AT2G39700	7	7	5	29.2	29.2	25.3	27.847	0	56.531	2539200000	8	34	0.743234	0.895223	0.409654	-0.151988	0.33358	0.181591	0.515133	0.846154	1.36129	HC	cell wall.modification	Symbols: ATEXPA4, ATEXP4, ATHEXP ALPHA 1.6 | ATEXPA4 (ARABIDOPSIS THALIANA EXPANSIN A4) | chr2:16543832-16545584 REVERSE	PF01357,PF03330	10	10.7	extracellular	EX	X	n.a	n.a	n.a	0	0	0	0
AT4G18970.1;AT4G18970.2	AT4G18970	7	5	5	33.2	26.9	26.9	39.598	0	42.187	199040000	12	17	-0.193262	0.335775	-0.8923	-0.529037	0.699038	0.170001	0.514167	0.846154	1.36032	HC	misc.GDSL-motif lipase	GDSL-motif lipase/hydrolase family protein | chr4:10389111-10390917 REVERSE	PF00657	26	26.28	extracellular	EX	X	n.a	n.a	n.a	0	0	0	0
AT1G47830.1	AT1G47830	2	2	2	12.7	12.7	12.7	17.067	0.00020338	3.9025	113460000	5	11	-0.0714973	NaN	-0.00793801	3	-0.0635592	2.93644	0.744703	0.615385	1.36009	HC	cell.vesicle transport	clathrin coat assembly protein, putative | chr1:17613098-17614926 REVERSE	PF01217	31	31.4	plasma membrane	PM	X	n.a	n.a	n.a	0	0	0	0
AT3G60600.1;AT3G60600.2;AT3G60600.3	AT3G60600	12	12	12	45.7	45.7	45.7	28.472	0	126.73	3155900000	15	110	0.853163	-0.874608	-0.354034	1.72777	1.2072	2.93497	0.744581	0.615385	1.35997	HC	DNA.unspecified	Symbols: VAP27-1, VAP, (AT)VAP, VAP27 | VAP (VESICLE ASSOCIATED PROTEIN); protein binding | chr3:22400395-22402702 FORWARD	PF00635	28	28.99	endoplasmic reticulum,plasma membrane	ER,PM	Likely PD protein	n.a	n.a	n.a	0	0	0	0
AT3G13790.1;AT3G13790.2;AT3G13790.5;AT3G13790.4;AT3G13790.3	AT3G13790	7	7	7	14.7	14.7	14.7	66.28	0	17.307	513750000	29	25	-0.631745	NaN	-0.56335	3	-0.0683954	2.9316	0.7443	0.615385	1.35968	HC	major CHO metabolism.degradation.sucrose.invertases.cell wall	Symbols: ATCWINV1, ATBFRUCT1 | ATBFRUCT1; beta-fructofuranosidase/ hydrolase, hydrolyzing O-glycosyl compounds | chr3:4532911-4535867 REVERSE	PF00251,PF08244	2	2.2	extracellular	EX	X	n.a	n.a	n.a	0	0	0	0
AT1G52420.1	AT1G52420	2	2	2	3	3	3	75.635	0.00020416	3.9441	145850000	24	4	-0.269505	NaN	-1.10805	3	0.838546	3.83855	0.819879	0.538462	1.35834	HC	misc.UDP glucosyl and glucoronyl transferases	glycosyl transferase family 1 protein | chr1:19527842-19531287 FORWARD	PF00534,PF16994	26	26.2	golgi	G	X	n.a	n.a	n.a	0	0	0	0
AT4G01810.3;AT4G01810.2;AT4G01810.1	AT4G01810	2	2	2	3.2	3.2	3.2	96.003	0.00020101	3.7003	201580000	46	11	-1.19153	NaN	-1.10626	3	-0.085275	2.91473	0.742894	0.615385	1.35828	HC	protein.targeting.secretory pathway.golgi	protein transport protein-related | chr4:776488-780355 REVERSE	PF00626,PF04810,PF04811,PF04815,PF08033	29	29.3.4	endoplasmic reticulum,golgi	ER,G	X	n.a	n.a	n.a	0	0	0	0
AT2G28360.1	AT2G28360	5	3	3	7.9	5.5	5.5	87.507	0	5.8619	79721000	43	4	-1.61517	NaN	-1.51962	3	-0.0955422	2.90446	0.742038	0.615385	1.35742	HC	not assigned.no ontology	INVOLVED IN: biological_process unknown; LOCATED IN: endomembrane system; EXPRESSED IN: 22 plant structures; EXPRESSED DURING: 13 growth stages; CONTAINS InterPro DOMAIN/s: SIT4 phosphatase-associated protein (InterPro:IPR007587); BEST Arabidopsis thaliana protein match is: SIT4 phosphatase-associated family protein (TAIR:AT1G07990.1); Has 1431 Blast hits to 1107 proteins in 182 species: Archae -…	PF04499,PF04499	35	35	plasma membrane	PM	X	n.a	n.a	n.a	0	0	0	0
AT4G30600.2;AT4G30600.1	AT4G30600	3	3	3	8.8	8.8	8.8	69.572	0	24.66	26682000	38	5	-1.2631	-1.16428	NaN	-0.0988176	3	2.90118	0.741765	0.615385	1.35715	HC	protein.targeting.secretory pathway.unspecified	signal recognition particle receptor alpha subunit family protein | chr4:14937840-14941018 REVERSE	PF02881,PF00448,PF04086	29	29.3.4	endoplasmic reticulum	ER	X	n.a	n.a	n.a	0	0	0	0
AT4G08160.1;AT4G08160.2	AT4G08160	12	12	12	20.1	20.1	20.1	84.551	0	66.665	552460000	39	45	-0.586807	-0.476931	NaN	-0.109877	3	2.89012	0.740844	0.615385	1.35623	HC	not assigned.no ontology	glycosyl hydrolase family 10 protein / carbohydrate-binding domain-containing protein | chr4:5159034-5162774 REVERSE	PF02018,PF02018,PF00331	35	35	extracellular,cytosol	EX,C	X	n.a	n.a	n.a	0	0	0	0
AT2G24180.1	AT2G24180	7	7	7	18.1	18.1	18.1	57.008	0	20.96	358320000	28	17	-1.07748	-1.34368	-0.922265	0.266195	-0.155216	0.110978	0.509248	0.846154	1.3554	HC	misc.cytochrome P450	Symbols: CYP71B6 | CYP71B6 (CYTOCHROME P450 71B6); electron carrier/ heme binding / iron ion binding / monooxygenase/ oxygen binding | chr2:10281847-10283735 FORWARD	PF00067	26	26.10	endoplasmic reticulum	ER	X	n.a	n.a	n.a	0	0	0	0
AT4G24330.1	AT4G24330	4	4	4	12.8	12.8	12.8	53.947	0	88.665	508670000	20	24	-0.605444	NaN	-0.473777	3	-0.131666	2.86833	0.739028	0.615385	1.35441	HC	not assigned.unknown	unknown protein | chr4:12603521-12606328 REVERSE	PF07946	35	35	endoplasmic reticulum	ER	X	n.a	n.a	n.a	0	0	0	0
AT1G10430.2;AT1G10430.1	AT1G10430	7	5	1	37.6	30.1	8.2	34.934	0	91.769	706670000	17	28	-0.24182	NaN	-0.108261	3	-0.133559	2.86644	0.73887	0.615385	1.35425	HC	protein.postranslational modification	Symbols: PP2A-2 | PP2A-2; protein serine/threonine phosphatase | chr1:3428478-3430633 REVERSE	PF00149	29	29.4	plasma membrane	PM	X	n.a	n.a	n.a	0	0	0	0
AT1G23460.2;AT1G23460.1	AT1G23460	2	2	2	5	5	5	47.049	0.00038895	3.1383	22212000	23	5	-0.980149	-1.2495	-0.802626	0.269347	-0.177524	0.0918235	0.507652	0.846154	1.35381	HC	cell wall.degradation.pectate lyases and polygalacturonases	polygalacturonase | chr1:8327312-8329622 FORWARD	PF00295	10	10.6	extracellular	EX	X	n.a	n.a	n.a	0	0	0	0
AT5G16280.2;AT5G16280.1	AT5G16280	2	2	2	2.5	2.5	2.5	143.48	0.0040613	2.3481	60292000	71	1	-1.84323	NaN	-1.68492	3	-0.158309	2.84169	0.736808	0.615385	1.35219	HC	not assigned.unknown	unknown protein | chr5:5323175-5331685 REVERSE	PF12739	35	35	golgi,plasma membrane	G,PM	X	n.a	n.a	n.a	0	0	0	0
AT2G25270.1	AT2G25270	3	3	3	10.1	10.1	10.1	59.912	0	41.687	115090000	15	12	-0.416256	-0.255365	NaN	-0.16089	3	2.83911	0.736592	0.615385	1.35198	HC	not assigned.unknown	unknown protein | chr2:10759724-10762568 FORWARD	#N/A	35	35	plasma membrane	PM	X	n.a	n.a	n.a	0	0	0	0
AT1G02205.2;AT1G02205.4;AT1G02205.3;AT1G02205.5;AT1G02205.1	AT1G02205	3	3	3	5.4	5.4	5.4	72.405	0	5.1608	81894000	33	1	-1.18369	-1.01752	NaN	-0.166178	3	2.83382	0.736152	0.615385	1.35154	HC	secondary metabolism.wax	Symbols: CER1 | CER1 (ECERIFERUM 1); octadecanal decarbonylase | chr1:418767-422438 FORWARD	PF04116,PF12076	16	16.7	plasma membrane,vacuole	PM,V	X	n.a	n.a	n.a	0	0	0	0
AT2G43610.1	AT2G43610	2	2	2	11.7	11.7	11.7	29.999	0	6.6644	95906000	20	6	-0.607516	-0.44092	NaN	-0.166596	3	2.8334	0.736117	0.615385	1.3515	HC	stress.biotic	glycoside hydrolase family 19 protein | chr2:18087840-18089224 REVERSE	PF00182,PF00182,PF00187	20	20.1	extracellular	EX	X	n.a	n.a	n.a	0	0	0	0
AT2G43800.1	AT2G43800	5	4	4	4.7	3.9	3.9	98.319	0	8.3708	65162000	42	7	-1.14301	NaN	-0.966125	3	-0.176884	2.82312	0.73526	0.615385	1.35064	HC	not assigned.no ontology.formin homology 2 domain-containing protein	formin homology 2 domain-containing protein / FH2 domain-containing protein | chr2:18145721-18148897 FORWARD	PF02181	35	35	extracellular	EX	Likely PD protein	n.a	n.a	n.a	0	0	0	0
AT2G22990.6;AT2G22990.2;AT2G22990.4;AT2G22990.1;AT2G22990.3;AT2G22990.5	AT2G22990	4	4	4	19.1	19.1	19.1	36.756	0	123.28	521460000	15	14	-0.638154	NaN	-0.44896	3	-0.189194	2.81081	0.734234	0.615385	1.34962	HC	protein.degradation.serine protease	Symbols: SNG1, SCPL8 | SNG1 (SINAPOYLGLUCOSE 1); serine-type carboxypeptidase/ sinapoylglucose-malate O-sinapoyltransferase | chr2:9786316-9790179 FORWARD	PF00450	29	29.5.5	plasma membrane,extracellular,vacuole	PM,EX,V	X	n.a	n.a	n.a	0	0	0	0
AT1G11580.1;AT1G11580.2	AT1G11580	19	18	17	35	33.8	32.5	61.687	0	151.95	10823000000	26	99	0.0929546	-0.7187	0.868454	0.811655	-0.7755	0.0361552	0.503013	0.846154	1.34917	HC	cell wall.pectin*esterases.PME	Symbols: ATPMEPCRA, PMEPCRA | PMEPCRA (METHYLESTERASE PCR A); enzyme inhibitor/ pectinesterase | chr1:3888690-3890811 FORWARD	PF01095,PF04043	10	10.8	extracellular	EX	X	n.a	n.a	n.a	0	0	0	0
AT5G12370.3;AT5G12370.2;AT5G12370.1	AT5G12370	14	14	14	21.1	21.1	21.1	89.036	0	26.579	431410000	51	21	-1.3077	NaN	-1.10593	3	-0.201766	2.79823	0.733186	0.615385	1.34857	HC	cell.vesicle transport	Symbols: SEC10 | SEC10 (EXOCYST COMPLEX COMPONENT SEC10) | chr5:4002775-4008804 REVERSE	PF07393,PF07393	31	31.4	plasma membrane,cytosol	PM,C	X	n.a	n.a	n.a	0	0	0	0
AT1G78970.3;AT1G78970.2;AT1G78970.1	AT1G78970	2	2	2	5.4	5.4	5.4	87.351	0	61.046	222060000	31	17	-1.46395	NaN	-1.24676	3	-0.217184	2.78282	0.731901	0.615385	1.34729	HC	secondary metabolism.isoprenoids.terpenoids	Symbols: LUP1, ATLUP1 | LUP1 (LUPEOL SYNTHASE 1); beta-amyrin synthase/ lupeol synthase | chr1:29703340-29707844 FORWARD	PF13249,PF13243	16	16.1	cytosol,plasma membrane	C,PM	X	n.a	n.a	n.a	0	0	0	0
AT1G64400.1	AT1G64400	6	4	4	11.9	8.4	8.4	74.75	0	11.555	320460000	31	10	-1.01145	NaN	-0.792442	3	-0.219007	2.78099	0.731749	0.615385	1.34713	HC	lipid metabolism.FA synthesis and FA elongation.long chain fatty acid CoA ligase	long-chain-fatty-acid--CoA ligase, putative / long-chain acyl-CoA synthetase, putative | chr1:23915598-23919783 REVERSE	PF00501	11	11.1	endoplasmic reticulum	ER	X	n.a	n.a	n.a	0	0	0	0
AT1G24450.1	AT1G24450	3	3	3	15.2	15.2	15.2	20.742	0	30.149	187180000	11	10	-0.776039	NaN	-0.551286	3	-0.224753	2.77525	0.731271	0.615385	1.34666	HC	RNA.processing.ribonucleases	Symbols: NFD2 | NFD2 (NUCLEAR FUSION DEFECTIVE 2); RNA binding / ribonuclease III | chr1:8664153-8665289 FORWARD	PF14622	27	27.1	extracellular	EX	X	n.a	n.a	n.a	0	0	0	0
AT2G23810.1	AT2G23810	2	2	2	7.7	7.7	7.7	30.658	0	6.1	362560000	13	11	-0.360553	NaN	-0.13514	3	-0.225412	2.77459	0.731216	0.615385	1.3466	HC	development.unspecified	Symbols: TET8 | TET8 (TETRASPANIN8) | chr2:10135605-10137561 REVERSE	PF00335	33	33.99	plasma membrane	PM	Likely PD protein	n.a	n.a	n.a	0	0	0	0
AT3G06530.3;AT3G06530.1;AT3G06530.2;AT3G06530.5;AT3G06530.4	AT3G06530	17	17	17	10.9	10.9	10.9	245.17	0	39.366	147120000	124	32	-1.42341	-1.19789	NaN	-0.225523	3	2.77448	0.731206	0.615385	1.34659	HC	protein.synthesis.ribosome biogenesis.Pre-rRNA processing and modifications.snoRNPs	binding | chr3:2022596-2033791 FORWARD	PF08146,PF12397	29	29.2	plasma membrane,golgi,plastid	PM,G,P	X	n.a	n.a	n.a	0	0	0	0
AT5G13200.1;AT5G13200.2	AT5G13200	6	6	6	32	32	32	30.07	0	21.6	342160000	13	18	-0.633421	NaN	-0.401049	3	-0.232372	2.76763	0.730636	0.615385	1.34602	HC	hormone metabolism.abscisic acid.induced-regulated-responsive-activated	GRAM domain-containing protein / ABA-responsive protein-related | chr5:4207004-4208289 FORWARD	PF02893	17	17.1	plasma membrane	PM	X	n.a	n.a	n.a	0	0	0	0
AT4G28770.1;AT4G28770.2	AT4G28770	3	3	3	18.9	18.9	18.9	30.976	0	28.729	189480000	9	9	-0.505176	NaN	-0.269081	3	-0.236095	2.76391	0.730325	0.615385	1.34571	HC	not assigned.unknown	FUNCTIONS IN: molecular_function unknown; LOCATED IN: plasma membrane, vacuole, membrane; EXPRESSED IN: 26 plant structures; EXPRESSED DURING: 15 growth stages; CONTAINS InterPro DOMAIN/s: Tetraspanin (InterPro:IPR018499); BEST Arabidopsis thaliana protein match is: unknown protein (TAIR:AT2G20230.1); Has 94 Blast hits to 94 proteins in 12 species: Archae - 0; Bacteria - 0; Metazoa - 0; Fungi - 0…	#N/A	35	35	vacuole,plasma membrane	V,PM	X	n.a	n.a	n.a	0	0	0	0
AT3G06035.1	AT3G06035	2	2	2	13.5	13.5	13.5	22.053	0	33.753	200670000	12	8	-0.393981	NaN	-0.152543	3	-0.241437	2.75856	0.72988	0.615385	1.34526	HC	not assigned.unknown	unknown protein | chr3:1823099-1824216 REVERSE	#N/A	35	35	extracellular	EX	X	n.a	n.a	n.a	0	0	0	0
AT1G64110.1;AT1G64110.5;AT1G64110.3;AT1G64110.4;AT1G64110.2	AT1G64110	5	5	5	10	10	10	91.96	0	15.187	81454000	51	6	-1.21209	NaN	-0.96404	3	-0.24805	2.75195	0.729329	0.615385	1.34471	HC	protein.degradation.AAA type	AAA-type ATPase family protein | chr1:23796719-23801725 REVERSE	PF00004,PF17862	29	29.5.9	endoplasmic reticulum	ER	X	n.a	n.a	n.a	0	0	0	0
AT1G71860.1;AT1G71860.3;AT1G71860.2	AT1G71860	7	7	7	27.6	27.6	27.6	37.798	0	18.952	437230000	16	13	-0.845411	NaN	-0.594645	3	-0.250766	2.74923	0.729103	0.615385	1.34449	HC	protein.postranslational modification	Symbols: PTP1, ATPTP1 | PTP1 (PROTEIN TYROSINE PHOSPHATASE 1); protein tyrosine phosphatase | chr1:27026711-27029092 FORWARD	PF00102	29	29.4	plastid,plasma membrane	P,PM	X	n.a	n.a	n.a	0	0	0	0
AT5G57580.1	AT5G57580	6	6	6	15.8	15.8	15.8	72.363	0	14.135	184610000	28	12	-0.811802	NaN	-1.47544	3	0.66364	3.66364	0.805303	0.538462	1.34376	HC	signalling.calcium	calmodulin-binding protein | chr5:23314716-23318125 REVERSE	PF07887	30	30.3	nucleus	N	X	n.a	n.a	n.a	0	0	0	0
AT5G18470.1	AT5G18470	9	9	9	27.8	27.8	27.8	45.807	0	42.27	1268100000	16	48	-0.051662	-0.0451372	-0.025263	-0.00652475	-0.026399	-0.0329237	0.497256	0.846154	1.34341	HC	misc.myrosinases-lectin-jacalin	curculin-like (mannose-binding) lectin family protein | chr5:6127797-6129285 FORWARD	PF01453	26	26.16	extracellular	EX	X	n.a	n.a	n.a	0	0	0	0
AT1G26560.1	AT1G26560	13	13	13	40.6	40.6	40.6	58.125	0	106.32	1393500000	30	44	-0.482426	-0.677828	-0.247287	0.195402	-0.235139	-0.0397377	0.496689	0.846154	1.34284	HC	misc.gluco-, galacto- and mannosidases	Symbols: BGLU40 | BGLU40 (BETA GLUCOSIDASE 40); catalytic/ cation binding / hydrolase, hydrolyzing O-glycosyl compounds | chr1:9178378-9181835 FORWARD	PF00232	26	26.3	extracellular	EX	X	n.a	n.a	n.a	0	0	0	0
AT5G07550.1	AT5G07550	1	1	1	17	17	17	10.682	0	4.5892	18652000	1	4	0.781873	1.05261	NaN	-0.270737	3	2.72926	0.727439	0.615385	1.34282	HC	not assigned.no ontology.glycine rich proteins	Symbols: GRP19, ATGRP19 | GRP19 (GLYCINE-RICH PROTEIN 19); lipid binding | chr5:2388310-2389249 REVERSE	PF01277	35	35	extracellular	EX	X	n.a	n.a	n.a	0	0	0	0
AT2G40890.1	AT2G40890	6	6	6	12	12	12	57.926	0	11.007	352290000	27	13	-1.09576	NaN	-0.820601	3	-0.275159	2.72484	0.72707	0.615385	1.34245	HC	secondary metabolism.phenylpropanoids.lignin biosynthesis.C3H	Symbols: CYP98A3 | CYP98A3 (cytochrome P450, family 98, subfamily A, polypeptide 3); monooxygenase/ p-coumarate 3-hydroxylase | chr2:17058053-17060652 REVERSE	PF00067	16	16.2	endoplasmic reticulum	ER	X	n.a	n.a	n.a	0	0	0	0
AT3G07680.1	AT3G07680	4	4	4	24.5	24.5	24.5	24.33	0	49.027	607210000	10	13	-0.263154	NaN	0.0221419	3	-0.285296	2.7147	0.726225	0.615385	1.34161	HC	protein.targeting.secretory pathway.unspecified	emp24/gp25L/p24 family protein | chr3:2455290-2456879 FORWARD	PF01105	29	29.3.4	endoplasmic reticulum	ER	X	n.a	n.a	n.a	0	0	0	0
AT3G17840.1	AT3G17840	7	7	6	15.6	15.6	14.2	70.405	0	31.554	459020000	36	25	-1.02813	-0.8312	-1.17024	-0.19693	0.142113	-0.0548176	0.495432	0.846154	1.34159	HC	signalling.receptor kinases.leucine rich repeat III	Symbols: RLK902 | RLK902; ATP binding / kinase/ protein serine/threonine kinase | chr3:6106028-6108675 FORWARD	PF00069,PF08263,PF13855	30	30.2	plasma membrane	PM	X	n.a	n.a	n.a	0	0	0	0
AT5G58390.1	AT5G58390	16	16	15	58.2	58.2	53.5	34.708	0	263	4722600000	16	86	0.12837	0.137008	0.178625	-0.00863861	-0.050255	-0.0588936	0.495092	0.846154	1.34125	HC	misc.peroxidases	peroxidase, putative | chr5:23599567-23601325 REVERSE	PF00141	26	26.12	extracellular	EX	X	n.a	n.a	n.a	0	0	0	0
AT1G07990.2;AT1G07990.1	AT1G07990	7	5	4	18.7	15.6	14.1	66.064	0	50.569	340260000	34	14	-0.793394	NaN	-1.41915	3	0.625759	3.62576	0.802147	0.538462	1.34061	HC	misc.acid and other phosphatases	SIT4 phosphatase-associated family protein | chr1:2477157-2483138 FORWARD	PF04499,PF04499	26	26.13	nucleus	N	X	n.a	n.a	n.a	0	0	0	0
AT1G35140.1	AT1G35140	4	4	4	18.8	18.8	18.8	33.185	0	8.4335	125570000	12	8	-0.177434	0.411027	-0.697025	-0.588461	0.519591	-0.0688692	0.494261	0.846154	1.34041	HC	signalling.in sugar and nutrient physiology	Symbols: PHI-1, EXL7 | PHI-1 (PHOSPHATE-INDUCED 1) | chr1:12851997-12853128 FORWARD	PF04674	30	30.1	extracellular	EX	Likely PD protein	n.a	n.a	n.a	0	0	0	0
AT3G07320.1	AT3G07320	14	14	14	25.9	25.9	25.9	50.603	0	171.24	1657300000	23	60	-0.245859	0.192534	-0.613666	-0.438393	0.367806	-0.0705869	0.494118	0.846154	1.34027	HC	misc.beta 1,3 glucan hydrolases.glucan endo-1,3-beta-glucosidase	glycosyl hydrolase family 17 protein | chr3:2332022-2334074 REVERSE	PF00332,PF07983	26	26.4	extracellular	EX	X	n.a	n.a	n.a	0	0	0	0
AT1G80500.2;AT1G80500.1	AT1G80500	2	2	2	17.8	17.8	17.8	15.264	0	5.0094	356220000	7	9	-0.178603	NaN	0.135132	3	-0.313735	2.68627	0.723855	0.615385	1.33924	HC	not assigned.no ontology	FUNCTIONS IN: molecular_function unknown; INVOLVED IN: transport, ER to Golgi vesicle-mediated transport; LOCATED IN: intracellular; EXPRESSED IN: 24 plant structures; EXPRESSED DURING: 15 growth stages; CONTAINS InterPro DOMAIN/s: Sedlin (InterPro:IPR006722), Longin-like (InterPro:IPR011012); BEST Arabidopsis thaliana protein match is: unknown protein (TAIR:AT2G20930.1); Has 437 Blast hits to 43…	PF04628	35	35	golgi,plasma membrane	G,PM	X	n.a	n.a	n.a	0	0	0	0
AT4G37800.1	AT4G37800	13	13	12	45.4	45.4	42.7	33.681	0	90.859	1999000000	16	48	0.295177	0.380577	0.298398	-0.0853994	-0.00322106	-0.0886205	0.492615	0.846154	1.33877	HC	cell wall.modification	xyloglucan:xyloglucosyl transferase, putative / xyloglucan endotransglycosylase, putative / endo-xyloglucan transferase, putative | chr4:17775474-17777397 REVERSE	PF06955,PF00722	10	10.7	extracellular	EX	X	n.a	n.a	n.a	0	0	0	0
AT2G21150.1	AT2G21150	3	3	3	7.1	7.1	7.1	39.239	0	10.875	16812000	18	6	-0.615955	NaN	-1.214	3	0.598048	3.59805	0.799837	0.538462	1.3383	HC	signalling.light	Symbols: XCT | XCT (XAP5 CIRCADIAN TIMEKEEPER) | chr2:9065338-9068093 FORWARD	PF04921	30	30.11	nucleus	N	X	n.a	n.a	n.a	0	0	0	0
AT5G05480.1	AT5G05480	3	3	3	5.9	5.9	5.9	68.434	0	7.2839	326970000	26	4	-1.10697	NaN	-0.768977	3	-0.337993	2.66201	0.721834	0.615385	1.33722	HC	not assigned.unknown	unknown protein | chr5:1622172-1624270 REVERSE	PF12222	35	35	extracellular	EX	X	n.a	n.a	n.a	0	0	0	0
AT1G30470.3;AT1G30470.2;AT1G30470.1	AT1G30470	8	8	8	15.4	15.4	15.4	84.901	0	42.225	299890000	41	19	-1.03223	NaN	-1.6137	3	0.581467	3.58147	0.798456	0.538462	1.33692	HC	metal handling.binding, chelation and storage	SIT4 phosphatase-associated family protein | chr1:10779171-10786666 FORWARD	PF04499,PF04499	15	15.2	golgi,nucleus	G,N	X	n.a	n.a	n.a	0	0	0	0
AT1G70710.1	AT1G70710	8	8	7	20.9	20.9	19.1	54.61	0	20.412	1157700000	20	35	0.128248	0.20585	0.165665	-0.0776013	-0.0374163	-0.115018	0.490415	0.846154	1.33657	HC	misc.gluco-, galacto- and mannosidases.endoglucanase	Symbols: ATGH9B1, CEL1 | ATGH9B1 (ARABIDOPSIS THALIANA GLYCOSYL HYDROLASE 9B1); cellulase/ hydrolase, hydrolyzing O-glycosyl compounds | chr1:26659132-26663010 REVERSE	PF00759	26	26.3	extracellular	EX	X	n.a	n.a	n.a	0	0	0	0
AT3G60860.1	AT3G60860	6	4	4	4	2.8	2.8	199.63	0	12.322	208940000	87	17	-1.29993	NaN	-1.87521	3	0.575279	3.57528	0.79794	0.538462	1.3364	HC	signalling.G-proteins	guanine nucleotide exchange family protein | chr3:22484804-22491722 FORWARD	PF01369,PF09324,PF12783,PF16206,PF16213	30	30.5	golgi	G	X	n.a	n.a	n.a	0	0	0	0
AT1G33800.1	AT1G33800	2	2	2	16.5	16.5	16.5	33.67	0	8.5801	44426000	16	3	-1.04723	NaN	-0.697869	3	-0.349361	2.65064	0.720887	0.615385	1.33627	HC	not assigned.unknown	unknown protein | chr1:12261419-12262717 FORWARD	PF04669	35	35	plasma membrane	PM	X	n.a	n.a	n.a	0	0	0	0
AT5G41790.2;AT5G41790.1	AT5G41790	82	82	80	52.7	52.7	52.6	181.98	0	323.31	11842000000	102	373	0.255043	NaN	-0.313582	3	0.568625	3.56863	0.797385	0.538462	1.33585	HC	signalling.light.COP9 signalosome	Symbols: CIP1 | CIP1 (COP1-INTERACTIVE PROTEIN 1); protein binding | chr5:16727530-16732847 FORWARD	#N/A	30	30.11	cytosol	C	X	n.a	n.a	n.a	0	0	0	0
AT4G03190.1	AT4G03190	4	4	4	6	6	6	65.648	0	18.758	347370000	27	10	-1.18857	NaN	-0.830236	3	-0.358331	2.64167	0.720139	0.615385	1.33552	HC	protein.degradation.ubiquitin.E3.SCF.FBOX	Symbols: GRH1, ATGRH1, AFB1 | GRH1 (GRR1-LIKE PROTEIN 1); auxin binding / protein binding / ubiquitin-protein ligase | chr4:1404887-1407139 REVERSE	PF18791,PF18511	29	29.5.11.4	plasma membrane	PM	X	n.a	n.a	n.a	0	0	0	0
AT4G33700.3;AT4G33700.1	AT4G33700	1	1	1	4.7	4.7	4.7	38.173	0	4.4112	53970000	14	6	-1.22203	NaN	-0.862555	3	-0.359471	2.64053	0.720044	0.615385	1.33543	HC	not assigned.no ontology	CBS domain-containing protein | chr4:16176276-16179481 REVERSE	PF01595	35	35	plasma membrane	PM	X	n.a	n.a	n.a	0	0	0	0
AT5G09730.1	AT5G09730	13	12	10	19.3	18.4	15.1	83.221	0	31.334	365870000	41	20	-1.05072	-1.5346	-0.437317	0.483884	-0.613402	-0.129518	0.489207	0.846154	1.33536	HC	cell wall.degradation.mannan-xylose-arabinose-fucose	Symbols: BXL3, ATBXL3, XYL3, ATBX3, BX3 | BXL3 (beta-xylosidase 3); hydrolase, hydrolyzing O-glycosyl compounds | chr5:3015247-3018262 REVERSE	PF00933,PF01915,PF14310	10	10.6	extracellular	EX	X	n.a	n.a	n.a	0	0	0	0
AT5G08370.2;AT5G08370.1	AT5G08370	11	11	11	38.9	38.9	38.9	41.138	0	69.359	649420000	23	20	-0.632206	NaN	-0.266351	3	-0.365855	2.63415	0.719512	0.615385	1.3349	HC	minor CHO metabolism.galactose.alpha-galactosidases	Symbols: AtAGAL2 | AtAGAL2 (Arabidopsis thaliana ALPHA-GALACTOSIDASE 2); alpha-galactosidase/ catalytic/ hydrolase, hydrolyzing O-glycosyl compounds | chr5:2690879-2693538 REVERSE	PF16499,PF17801	3	3.8	extracellular	EX	X	n.a	n.a	n.a	0	0	0	0
AT2G40370.1	AT2G40370	3	3	3	7.1	7.1	7.1	64.132	0	19.082	27470000	23	6	-0.822971	-0.428614	NaN	-0.394357	3	2.60564	0.717137	0.615385	1.33252	HC	secondary metabolism.simple phenols	Symbols: LAC5 | LAC5 (laccase 5); laccase | chr2:16858166-16860606 REVERSE	PF07732,PF07731,PF00394	16	16.10	extracellular	EX	X	n.a	n.a	n.a	0	0	0	0
AT2G43570.1	AT2G43570	4	4	4	21.3	21.3	21.3	29.775	0	23.305	395490000	16	15	-0.621999	NaN	-0.226395	3	-0.395605	2.6044	0.717033	0.615385	1.33242	HC	stress.biotic	chitinase, putative | chr2:18076224-18077463 REVERSE	PF00182,PF00187	20	20.1	extracellular	EX	X	n.a	n.a	n.a	0	0	0	0
AT5G16590.1	AT5G16590	14	7	7	24.2	13.6	13.6	67.463	0	54.285	486070000	41	34	-0.865384	-0.601739	-0.960547	-0.263645	0.0951635	-0.168481	0.48596	0.846154	1.33211	HC	signalling.receptor kinases.leucine rich repeat III	Symbols: LRR1 | LRR1; ATP binding / kinase/ protein serine/threonine kinase | chr5:5431681-5434134 FORWARD	PF00069,PF08263	30	30.2	plasma membrane	PM	X	n.a	n.a	n.a	0	0	0	0
AT3G07850.1;AT3G14040.1	AT3G07850	8	8	8	21.8	21.8	21.8	45.6	0	13.749	134660000	23	12	-0.822661	-0.460623	-1.01071	-0.362038	0.188051	-0.173986	0.485501	0.846154	1.33165	HC	cell wall.degradation.pectate lyases and polygalacturonases	exopolygalacturonase / galacturan 1,4-alpha-galacturonidase / pectinase | chr3:2505547-2507528 REVERSE	PF00295	10	10.6	extracellular	EX	X	n.a	n.a	n.a	0	0	0	0
AT2G29350.1;AT2G29350.2;AT2G29350.3	AT2G29350	6	5	4	32.3	27.9	24.9	28.819	0	25.1	1551200000	11	25	-0.0138046	-0.522734	0.679397	0.50893	-0.693202	-0.184272	0.484644	0.846154	1.3308	HC	misc.nitrilases, *nitrile lyases, berberine bridge enzymes, reticuline oxidases, troponine reductases	Symbols: SAG13 | SAG13; alcohol dehydrogenase/ oxidoreductase | chr2:12600914-12602556 FORWARD	PF13561	26	26.8	peroxisome,plasma membrane,vacuole	PX,PM,V	X	n.a	n.a	n.a	0	0	0	0
AT4G29900.2;AT4G29900.1	AT4G29900	4	4	4	5.5	5.5	5.5	116.86	0	33.951	214680000	46	10	-1.17577	-1.08183	-1.07914	-0.0939394	-0.096628	-0.190567	0.484119	0.846154	1.33027	HC	signalling.calcium	Symbols: ACA10, CIF1, ATACA10 | ACA10 (AUTOINHIBITED CA(2+)-ATPASE 10); calcium-transporting ATPase/ calmodulin binding | chr4:14610883-14618775 REVERSE	PF00122,PF00689,PF00690,PF00702,PF12515	30	30.3	plasma membrane	PM	X	n.a	n.a	n.a	0	0	0	0
AT1G13320.3;AT1G13320.1;AT1G13320.2;AT1G13320.4	AT1G13320	19	11	11	52.8	34.1	34.1	65.516	0	245.55	1074300000	29	37	-1.13404	NaN	-0.711231	3	-0.422811	2.57719	0.714766	0.615385	1.33015	HC	protein.postranslational modification	Symbols: PP2AA3 | PP2AA3 (PROTEIN PHOSPHATASE 2A SUBUNIT A3); binding / protein phosphatase type 2A regulator | chr1:4563476-4567750 REVERSE	PF13646,PF12755	29	29.4	plasma membrane,cytosol	PM,C	X	n.a	n.a	n.a	0	0	0	0
AT2G17930.1;AT4G36080.2;AT4G36080.3;AT4G36080.1	AT2G17930	4	4	4	1.3	1.3	1.3	436.35	0	9.1794	49640000	224	8	-2.14742	NaN	-2.64659	3	0.499165	3.49916	0.791597	0.538462	1.33006	HC	signalling.phosphinositides	binding / inositol or phosphatidylinositol kinase/ phosphotransferase, alcohol group as acceptor | chr2:7784288-7802230 REVERSE	PF00454,PF02259,PF02260	30	30.4	nucleus	N	X	n.a	n.a	n.a	0	0	0	0
AT2G43160.5;AT2G43160.3;AT2G43160.2;AT2G43160.1;AT2G43160.4	AT2G43160	9	9	9	12	12	12	95.477	0	73.755	741690000	22	30	-0.870559	NaN	-0.44356	3	-0.426999	2.573	0.714417	0.615385	1.3298	HC	not assigned.no ontology.epsin N-terminal homology (ENTH) domain-containing protein	epsin N-terminal homology (ENTH) domain-containing protein | chr2:17948067-17953669 FORWARD	PF01417	35	35	nucleus,plasma membrane	N,PM	X	n.a	n.a	n.a	0	0	0	0
AT4G08950.1	AT4G08950	4	4	4	15.3	15.3	15.3	33.599	0	60.91	889660000	14	34	-0.0955984	0.0381866	-0.0269501	-0.133785	-0.0686483	-0.202433	0.483131	0.846154	1.32928	HC	signalling.in sugar and nutrient physiology	Symbols: EXO | EXO (EXORDIUM) | chr4:5740297-5741524 FORWARD	PF04674	30	30.1	extracellular	EX	Likely PD protein	n.a	n.a	n.a	0	0	0	0
AT4G20410.1;AT4G20410.2	AT4G20410	9	9	9	38.5	38.5	38.5	32.36	0	58.122	621430000	18	14	-0.795535	NaN	-0.353325	3	-0.44221	2.55779	0.713149	0.615385	1.32853	HC	protein.targeting.secretory pathway.unspecified	Symbols: GSNAP, GAMMA-SNAP | GSNAP (GAMMA-SOLUBLE NSF ATTACHMENT PROTEIN); binding / transporter | chr4:11013895-11016576 REVERSE	PF14938	29	29.3.4	plasma membrane	PM	X	n.a	n.a	n.a	0	0	0	0
AT4G33220.1;AT4G33220.2	AT4G33220	12	10	7	21.3	18.5	12.6	58.499	0	59.686	2715100000	26	92	-0.0198639	-0.299434	0.478	0.27957	-0.497864	-0.218294	0.481809	0.846154	1.32796	HC	cell wall.pectin*esterases.PME	Symbols: PME44, ATPME44 | enzyme inhibitor/ pectinesterase | chr4:16022439-16026360 FORWARD	PF01095,PF04043	10	10.8	extracellular	EX	X	n.a	n.a	n.a	0	0	0	0
AT4G14080.1	AT4G14080	4	4	4	18.4	18.4	18.4	53.471	0	23.895	123270000	23	10	-0.794355	0.00458232	-1.37363	-0.798937	0.579274	-0.219664	0.481695	0.846154	1.32785	HC	misc.beta 1,3 glucan hydrolases.glucan endo-1,3-beta-glucosidase	Symbols: MEE48 | MEE48 (maternal effect embryo arrest 48); catalytic/ cation binding / hydrolase, hydrolyzing O-glycosyl compounds | chr4:8118537-8120358 REVERSE	PF00332,PF07983	26	26.4	extracellular	EX	X	n.a	n.a	n.a	0	0	0	0
AT1G71820.1;AT1G71820.2	AT1G71820	8	8	8	12.9	12.9	12.9	85.673	0	19.414	467140000	35	25	-1.00333	NaN	-0.551375	3	-0.451959	2.54804	0.712337	0.615385	1.32772	HC	not assigned.unknown	Symbols: SEC6 | SEC6 | chr1:27009634-27017108 FORWARD	PF06046	35	35	plasma membrane,cytosol	PM,C	X	n.a	n.a	n.a	0	0	0	0
AT1G47960.2;AT1G47960.1	AT1G47960	3	3	3	25.3	25.3	25.3	18.033	0	8.5399	262440000	6	15	0.0203215	0.122847	0.146083	-0.102525	-0.125761	-0.228286	0.480976	0.846154	1.32713	HC	misc.invertase/pectin methylesterase inhibitor family protein	Symbols: C/VIF1, ATC/VIF1 | C/VIF1 (CELL WALL / VACUOLAR INHIBITOR OF FRUCTOSIDASE 1); enzyme inhibitor/ pectinesterase/ pectinesterase inhibitor | chr1:17681157-17683629 REVERSE	PF04043	26	26.18	extracellular	EX	X	n.a	n.a	n.a	0	0	0	0
AT2G39780.1;AT2G39780.2	AT2G39780	3	3	3	17	17	17	29.153	0	5.374	258390000	12	3	-0.839613	NaN	-0.365706	3	-0.473907	2.52609	0.710508	0.615385	1.32589	HC	RNA.processing.ribonucleases	Symbols: RNS2 | RNS2 (RIBONUCLEASE 2); RNA binding / endoribonuclease/ ribonuclease T2 | chr2:16591222-16593775 FORWARD	PF00445	27	27.1	extracellular	EX	X	n.a	n.a	n.a	0	0	0	0
AT1G78850.1;AT1G78860.1	AT1G78850	21	21	21	49.2	49.2	49.2	49.051	0	239.65	18769000000	26	238	1.05599	1.09245	1.29169	-0.036459	-0.235694	-0.272153	0.477321	0.846154	1.32347	HC	misc.myrosinases-lectin-jacalin	curculin-like (mannose-binding) lectin family protein | chr1:29641926-29643431 REVERSE	PF01453	26	26.16	extracellular	EX	X	n.a	n.a	n.a	0	0	0	0
AT2G38760.1	AT2G38760	1	1	1	5	5	5	36.255	0	5.1771	14229000	17	1	-1.54281	NaN	-1.03346	3	-0.50935	2.49065	0.707554	0.615385	1.32294	HC	cell.organisation	Symbols: ANNAT3 | ANNAT3 (ANNEXIN ARABIDOPSIS 3); calcium ion binding / calcium-dependent phospholipid binding | chr2:16200994-16202669 FORWARD	PF00191,PF00191,PF00191,PF00191	31	31.1	cytosol,plasma membrane	C,PM	X	n.a	n.a	n.a	0	0	0	0
AT5G40450.2;AT5G40450.1	AT5G40450	53	53	53	26.7	26.7	26.7	323	0	323.31	2773200000	172	123	-1.2426	NaN	-0.711927	3	-0.530673	2.46933	0.705777	0.615385	1.32116	HC	not assigned.unknown	unknown protein | chr5:16184650-16193678 REVERSE	#N/A	35	35	plasma membrane	PM	X	n.a	n.a	n.a	0	0	0	0
AT2G30740.9;AT2G30740.8;AT2G30740.7;AT2G30740.6;AT2G30740.5;AT2G30740.4;AT2G30740.3;AT2G30740.2;AT2G30740.15;AT2G30740.14;AT2G30740.13;AT2G30740.12;AT2G30740.11;AT2G30740.10;AT2G30740.1	AT2G30740	6	6	2	23.8	23.8	8.7	40.5	0	24.44	772200000	24	19	-0.697614	NaN	-0.163649	3	-0.533965	2.46604	0.705503	0.615385	1.32089	HC	signalling.kinase.RLCK.receptor like cytoplasmatic kinase VIII	serine/threonine protein kinase, putative | chr2:13095976-13098594 FORWARD	PF07714	30	30.30.2	plasma membrane	PM	X	n.a	n.a	n.a	0	0	0	0
AT5G55940.1	AT5G55940	3	3	3	18.3	18.3	18.3	22.979	0	10.26	277220000	12	14	-0.758727	NaN	-0.219891	3	-0.538836	2.46116	0.705097	0.615385	1.32048	HC	development.unspecified	Symbols: emb2731 | emb2731 (embryo defective 2731) | chr5:22655998-22658048 REVERSE	PF03665	33	33.99	endoplasmic reticulum	ER	X	n.a	n.a	n.a	0	0	0	0
AT2G38280.2;AT2G38280.1	AT2G38280	11	11	11	16.9	16.9	16.9	95.128	0	46.132	889570000	42	29	-1.42175	NaN	-0.876991	3	-0.544762	2.45524	0.704603	0.615385	1.31999	HC	nucleotide metabolism.degradation	Symbols: FAC1, ATAMPD | FAC1 (EMBRYONIC FACTOR1); AMP deaminase | chr2:16033448-16038876 REVERSE	PF00962	23	23.2	endoplasmic reticulum	ER	X	n.a	n.a	n.a	0	0	0	0
AT5G53370.1;AT5G53370.2	AT5G53370	14	13	13	24.9	23.7	23.7	64.24	0	27.784	2152400000	32	50	-0.483169	-0.499787	-0.151419	0.0166179	-0.33175	-0.315132	0.473739	0.846154	1.31989	HC	cell wall.pectin*esterases.PME	Symbols: ATPMEPCRF, PMEPCRF | PMEPCRF (PECTIN METHYLESTERASE PCR FRAGMENT F); pectinesterase | chr5:21649532-21651593 REVERSE	PF01095,PF04043	10	10.8	extracellular	EX	Likely PD protein	n.a	n.a	n.a	0	0	0	0
AT2G46650.1	AT2G46650	6	6	6	72.7	72.7	72.7	14.873	0	63.894	2434700000	7	29	0.223044	NaN	0.775527	3	-0.552483	2.44752	0.70396	0.615385	1.31934	HC	redox.ascorbate and glutathione	Symbols: B5 #1, ATCB5-C, CB5-C | CB5-C (CYTOCHROME B5 ISOFORM C); heme binding | chr2:19151646-19152600 FORWARD	PF00173	21	21.2	plasma membrane	PM	X	n.a	n.a	n.a	0	0	0	0
AT4G19410.1;AT4G19410.2	AT4G19410	16	16	13	50.9	50.9	43.7	42.125	0	157.93	6793600000	21	123	0.264511	-0.149911	1.00325	0.414422	-0.738743	-0.32432	0.472973	0.846154	1.31913	HC	cell wall.pectin*esterases.acetyl esterase	pectinacetylesterase, putative | chr4:10582021-10585758 REVERSE	PF03283	10	10.8	extracellular	EX	X	n.a	n.a	n.a	0	0	0	0
AT1G12140.2;AT1G12140.3;AT1G12140.1	AT1G12140	2	2	2	4.4	4.4	4.4	51.933	0.00020713	4.1569	500730000	26	7	-0.841182	NaN	-0.283847	3	-0.557335	2.44266	0.703555	0.615385	1.31894	HC	secondary metabolism.sulfur-containing.glucosinolates.synthesis.aliphatic.flavin-containing monooxygenase	Symbols: FMO GS-OX5 | FMO GS-OX5 (FLAVIN-MONOOXYGENASE GLUCOSINOLATE S-OXYGENASE 5); 8-methylthiopropyl glucosinolate S-oxygenase/ flavin-containing monooxygenase/ monooxygenase | chr1:4121369-4124595 FORWARD	PF00743,PF00743	16	16.5	cytosol,mitochondrion,plasma membrane	C,M,PM	X	n.a	n.a	n.a	0	0	0	0
AT5G03350.1	AT5G03350	5	4	4	21.5	18.6	18.6	30.162	0	25.361	685500000	13	10	-0.28628	-0.513351	0.267509	0.227071	-0.553789	-0.326718	0.472773	0.846154	1.31893	HC	misc.myrosinases-lectin-jacalin	legume lectin family protein | chr5:815674-816658 REVERSE	PF00139	26	26.16	extracellular	EX	X	n.a	n.a	n.a	0	0	0	0
AT4G19840.1	AT4G19840	4	4	4	22.8	22.8	22.8	28.101	0	13.378	266000000	14	15	-0.314263	NaN	-0.678834	3	0.364571	3.36457	0.780381	0.538462	1.31884	HC	misc.myrosinases-lectin-jacalin	Symbols: ATPP2-A1, ATPP2A-1, PP2-A1 | ATPP2-A1; carbohydrate binding | chr4:10774273-10775901 FORWARD	PF14299	26	26.16	nucleus	N	X	n.a	n.a	n.a	0	0	0	0
AT1G74300.2;AT1G74300.1;AT2G36290.2;AT2G36290.1	AT1G74300	1	1	1	7.3	7.3	7.3	27.988	0	26.847	158460000	13	7	-1.05075	NaN	-0.480061	3	-0.570688	2.42931	0.702443	0.615385	1.31783	HC	not assigned.no ontology	esterase/lipase/thioesterase family protein | chr1:27935298-27936608 FORWARD	PF12697	35	35	extracellular	EX	X	n.a	n.a	n.a	0	0	0	0
AT2G27210.2;AT2G27210.1	AT2G27210	5	4	1	7.7	6.2	1.3	107.02	0	11.911	438300000	52	9	-1.67859	NaN	-1.10506	3	-0.573536	2.42646	0.702205	0.615385	1.31759	HC	protein.degradation.ubiquitin.E3.SCF.FBOX	Symbols: BSL3 | kelch repeat-containing serine/threonine phosphoesterase family protein | chr2:11629919-11636708 FORWARD	PF00149,PF07646	29	29.5.11.4	plasma membrane,nucleus	PM,N	X	n.a	n.a	n.a	0	0	0	0
AT1G02816.1;AT4G02370.1	AT1G02816	2	2	2	12	12	12	18.496	0	4.8567	497590000	6	11	-0.0649147	NaN	0.50891	3	-0.573825	2.42618	0.702181	0.615385	1.31757	HC	not assigned.unknown	unknown protein | chr1:621461-622469 FORWARD	PF04398	35	35	extracellular	EX	X	n.a	n.a	n.a	0	0	0	0
AT1G74690.1	AT1G74690	2	2	2	5.3	5.3	5.3	65.199	0	5.7835	47620000	22	5	-0.922335	NaN	-1.2507	3	0.328364	3.32836	0.777364	0.538462	1.31583	HC	signalling.calcium	Symbols: IQD31 | IQD31 (IQ-domain 31); calmodulin binding | chr1:28061159-28064625 REVERSE	PF00612,PF00612,PF13178	30	30.3	cytosol	C	X	n.a	n.a	n.a	0	0	0	0
AT2G20050.2;AT2G20050.1	AT2G20050	3	3	3	4.9	4.9	4.9	121.09	0	15.853	322850000	50	5	-1.64715	NaN	-1.048	3	-0.599153	2.40085	0.700071	0.615385	1.31546	HC	signaling.kinase.cytoplasmatic kinase.AGC	ATP binding / cAMP-dependent protein kinase regulator/ catalytic/ protein kinase/ protein serine/threonine phosphatase | chr2:8649434-8654228 REVERSE	PF00481,PF00027,PF00027,PF00069	30	30.30.1.1	plasma membrane,cytosol	PM,C	X	n.a	n.a	n.a	0	0	0	0
AT5G47200.1;AT4G17530.1	AT5G47200	11	11	9	62.9	62.9	52.5	22.313	0	108.26	4613300000	16	72	0.384175	0.0997672	1.05142	0.284408	-0.667249	-0.382842	0.468097	0.846154	1.31425	HC	signalling.G-proteins	Symbols: ATRABD2B, ATRAB1A | ATRAB1A; GTP binding | chr5:19166902-19169026 FORWARD	PF00071	30	30.5	endoplasmic reticulum,golgi	ER,G	X	n.a	n.a	n.a	0	0	0	0
AT5G15870.1	AT5G15870	21	21	21	39.9	39.9	39.9	82.872	0	212.55	3100200000	31	114	-0.0358647	-0.912153	-1.5398	0.876288	1.50393	2.38022	0.698352	0.615385	1.31374	HC	stress.biotic	glycosyl hydrolase family 81 protein | chr5:5182641-5184878 REVERSE	PF03639,PF17652	20	20.1	extracellular	EX	Likely PD protein	n.a	n.a	n.a	0	0	0	0
AT4G02080.1	AT4G02080	13	13	5	76.2	76.2	32.1	22.03	0	214.15	14844000000	13	146	0.473602	-0.305641	1.64632	0.779243	-1.17272	-0.393477	0.46721	0.846154	1.31336	HC	signalling.G-proteins	Symbols: ASAR1, ATSARA1C, ATSAR2 | ATSAR2 (ARABIDOPSIS THALIANA SECRETION-ASSOCIATED RAS SUPER FAMILY 2); GTP binding | chr4:921454-922777 FORWARD	PF00025	30	30.5	plasma membrane	PM	X	n.a	n.a	n.a	0	0	0	0
AT4G23170.1	AT4G23170	5	5	3	20	20	16.6	29.722	0	85.673	825890000	10	17	0.283449	0.774787	0.191598	-0.491338	0.091851	-0.399487	0.466709	0.846154	1.31286	HC	signalling.receptor kinases.misc	Symbols: EP1 | EP1; protein kinase | chr4:12135093-12136157 FORWARD	PF01657,PF01657	30	30.2	extracellular	EX	X	n.a	n.a	n.a	0	0	0	0
AT1G09010.1	AT1G09010	26	26	26	32.7	32.7	32.7	107.66	0	147.36	3008800000	53	107	-0.712772	-0.879236	-0.144661	0.166463	-0.568111	-0.401648	0.466529	0.846154	1.31268	HC	misc.gluco-, galacto- and mannosidases	glycoside hydrolase family 2 protein | chr1:2895166-2899384 REVERSE	PF00703,PF02836,PF18368	26	26.3	extracellular	EX	X	n.a	n.a	n.a	0	0	0	0
AT5G09530.1	AT5G09530	3	3	3	20.8	20.8	20.8	41.609	0.00019924	3.5419	75252000	4	5	-0.0273288	0.613414	NaN	-0.640743	3	2.35926	0.696605	0.615385	1.31199	HC	not assigned.no ontology.hydroxyproline rich proteins	hydroxyproline-rich glycoprotein family protein | chr5:2959734-2961271 REVERSE	#N/A	35	35	extracellular	EX	Likely PD protein	n.a	n.a	n.a	0	0	0	0
AT1G55570.1	AT1G55570	7	7	3	16.2	16.2	8.5	62.212	0	20.177	2666500000	24	34	0.40986	0.936121	0.296246	-0.526261	0.113614	-0.412648	0.465613	0.846154	1.31177	HC	misc.oxidases - copper, flavone etc	Symbols: sks12 | sks12 (SKU5 Similar 12); copper ion binding / oxidoreductase | chr1:20757767-20760076 FORWARD	PF00394,PF07732,PF07731	26	26.7	extracellular	EX	X	n.a	n.a	n.a	0	0	0	0
AT3G50950.2;AT3G50950.1	AT3G50950	3	3	3	4.8	4.8	4.8	97.039	0	6.3173	70696000	50	3	-1.58351	NaN	-0.939945	3	-0.643565	2.35643	0.69637	0.615385	1.31175	HC	stress.biotic.PR-proteins	disease resistance protein (CC-NBS-LRR class), putative | chr3:18935714-18938685 FORWARD	PF18052,PF00931	20	20.1	cytosol,plasma membrane	C,PM	X	n.a	n.a	n.a	0	0	0	0
AT3G13460.2;AT3G13460.4;AT3G13460.1;AT3G13460.3	AT3G13460	8	7	6	16.7	14.9	12.5	72.196	0	23.406	622670000	28	28	-0.98415	-0.880128	-0.674169	-0.104022	-0.309981	-0.414003	0.4655	0.846154	1.31165	HC	signalling.calcium	Symbols: ECT2 | ECT2; protein binding | chr3:4384714-4388525 REVERSE	PF04146	30	30.3	nucleus,plasma membrane,cytosol	N,PM,C	X	n.a	n.a	n.a	0	0	0	0
AT3G43670.1	AT3G43670	9	9	8	19.2	19.2	17.6	77.532	0	39.362	669590000	30	24	-0.453695	0.288204	-0.77451	-0.741898	0.320815	-0.421083	0.46491	0.846154	1.31106	HC	misc.oxidases - copper, flavone etc	copper amine oxidase, putative | chr3:15567099-15569901 FORWARD	PF01179,PF02728,PF02727	26	26.7	extracellular	EX	X	n.a	n.a	n.a	0	0	0	0
AT5G64440.1	AT5G64440	22	22	22	46.8	46.8	46.8	66.078	0	69.337	1336800000	34	45	-0.911781	NaN	-0.254128	3	-0.657652	2.34235	0.695196	0.615385	1.31058	HC	not assigned.no ontology	Symbols: AtFAAH | AtFAAH (Arabidopsis thaliana fatty acid amide hydrolase); N-(long-chain-acyl)ethanolamine deacylase/ amidase | chr5:25765750-25770500 FORWARD	PF01425	35	35	endoplasmic reticulum	ER	X	n.a	n.a	n.a	0	0	0	0
AT2G37710.1	AT2G37710	3	2	2	5.6	4.4	4.4	75.541	0	12.607	130150000	29	10	-1.38532	-1.24594	-1.0972	-0.139382	-0.288125	-0.427507	0.464374	0.846154	1.31053	HC	signalling.receptor kinases.legume-lectin	Symbols: RLK | RLK (receptor lectin kinase); kinase | chr2:15814718-15817004 REVERSE	PF00069,PF00139	30	30.2	plasma membrane	PM	X	n.a	n.a	n.a	0	0	0	0
AT5G06870.1	AT5G06870	18	18	18	68.8	68.8	68.8	37.067	0	311.33	10506000000	17	153	0.441973	0.286956	1.02771	0.155017	-0.585737	-0.43072	0.464107	0.846154	1.31026	HC	cell wall.degradation.pectate lyases and polygalacturonases	Symbols: PGIP2, ATPGIP2 | PGIP2 (POLYGALACTURONASE INHIBITING PROTEIN 2); protein binding | chr5:2133918-2135166 FORWARD	PF08263,PF13855	10	10.6	extracellular	EX	X	n.a	n.a	n.a	0	0	0	0
AT3G13750.1	AT3G13750	24	24	24	40.6	40.6	40.6	93.658	0	205.83	4873900000	40	161	-0.324831	-0.295421	0.0907071	-0.0294102	-0.415538	-0.444948	0.462921	0.846154	1.30907	HC	misc.gluco-, galacto- and mannosidases.beta-galactosidase	Symbols: BGAL1 | BGAL1 (Beta galactosidase 1); beta-galactosidase/ catalytic/ cation binding / heme binding / peroxidase/ sugar binding | chr3:4510965-4516298 FORWARD	PF01301,PF02140,PF17834	26	26.3	extracellular	EX	X	n.a	n.a	n.a	0	0	0	0
AT1G01370.4;AT1G01370.3;AT1G01370.2;AT1G01370.1	AT1G01370	2	2	2	14.6	14.6	14.6	19.709	0	12.043	118980000	5	6	0.253443	NaN	NaN	3	3	6	1	0.307692	1.30769	HC	DNA.synthesis/chromatin structure	Symbols: HTR12, CENH3 | HTR12; DNA binding | chr1:143564-145650 FORWARD	PF00125	28	28.1	nucleus	N	X	n.a	n.a	n.a	0	0	0	0
AT1G03080.3;AT1G03080.2;AT1G03080.1	AT1G03080	2	2	2	1.1	1.1	1.1	198.55	0.00019837	3.4807	24377000	97	5	-1.74366	NaN	NaN	3	3	6	1	0.307692	1.30769	HC	protein.postranslational modification	FUNCTIONS IN: molecular_function unknown; INVOLVED IN: biological_process unknown; LOCATED IN: plasma membrane; EXPRESSED IN: 22 plant structures; EXPRESSED DURING: 13 growth stages; CONTAINS InterPro DOMAIN/s: Prefoldin (InterPro:IPR009053), KIP1-like (InterPro:IPR011684); BEST Arabidopsis thaliana protein match is: kinase interacting family protein (TAIR:AT3G22790.1); Has 169162 Blast hits to 6…	PF07765	29	29.4	nucleus	N	X	n.a	n.a	n.a	0	0	0	0
AT1G03140.1	AT1G03140	1	1	1	2.6	2.6	2.6	47.881	0.00058309	3.1242	16524000	23	2	-1.20482	NaN	NaN	3	3	6	1	0.307692	1.30769	HC	RNA.processing.splicing	splicing factor Prp18 family protein | chr1:754371-756303 REVERSE	PF02840,PF08799	27	27.1	nucleus	N	X	n.a	n.a	n.a	0	0	0	0
AT1G03530.1	AT1G03530	1	1	1	1.7	1.7	1.7	88.837	0.0066547	2.0849	18101000	20	1	-1.07349	NaN	NaN	3	3	6	1	0.307692	1.30769	HC	RNA.processing	Symbols: ATNAF1, NAF1 | NAF1 (NUCLEAR ASSEMBLY FACTOR 1) | chr1:880496-883391 REVERSE	PF04410	27	27.1	nucleus	N	X	n.a	n.a	n.a	0	0	0	0
AT1G03910.1;AT1G03910.2	AT1G03910	4	4	4	6.8	6.8	6.8	78.285	0	7.5434	55350000	29	5	-0.814016	NaN	NaN	3	3	6	1	0.307692	1.30769	HC	not assigned.no ontology	EXPRESSED IN: 25 plant structures; EXPRESSED DURING: 13 growth stages; CONTAINS InterPro DOMAIN/s: Cactin, central region (InterPro:IPR018816); BEST Arabidopsis thaliana protein match is: unknown protein (TAIR:AT2G36815.2); Has 11516 Blast hits to 6722 proteins in 356 species: Archae - 23; Bacteria - 259; Metazoa - 6122; Fungi - 1009; Plants - 493; Viruses - 33; Other Eukaryotes - 3577 (source: N…	PF09732,PF10312	35	35	nucleus	N	X	n.a	n.a	n.a	0	0	0	0
AT1G04950.3;AT1G04950.2;AT1G04950.1	AT1G04950	2	2	2	5.8	5.8	5.8	61.364	0	36.089	52818000	27	8	-1.0528	NaN	NaN	3	3	6	1	0.307692	1.30769	HC	RNA.regulation of transcription.putative transcription regulator	Symbols: TAFII59, TAF6, ATTAF6 | TAF6 (TBP-ASSOCIATED FACTOR 6); DNA binding / RNA polymerase II transcription factor/ transcription initiation factor | chr1:1403085-1407468 REVERSE	PF07571,PF02969	27	27.3	nucleus	N	X	n.a	n.a	n.a	0	0	0	0
AT1G07790.1	AT1G07790	11	1	1	56.8	7.4	7.4	16.402	0.0005823	3.1133	47890000	6	6	0.870453	NaN	NaN	3	3	6	1	0.307692	1.30769	HC	DNA.synthesis/chromatin structure.histone.core.H2B	Symbols: HTB1 | HTB1; DNA binding | chr1:2412980-2413708 FORWARD	PF00125	28	28.1	nucleus	N	X	n.a	n.a	n.a	0	0	0	0
AT1G08600.1;AT1G08600.4;AT1G08600.3;AT1G08600.2	AT1G08600	1	1	1	2	2	2	165.91	0	36.939	39303000	80	4	-1.57047	NaN	NaN	3	3	6	1	0.307692	1.30769	HC	RNA.regulation of transcription.Chromatin Remodeling Factors	Symbols: ATRX, CHR20 | ATRX; ATP binding / DNA binding / helicase/ nucleic acid binding | chr1:2724562-2733613 FORWARD	PF00176,PF00176,PF00271	27	27.3	nucleus	N	X	n.a	n.a	n.a	0	0	0	0
AT1G09140.3;AT1G09140.2;AT1G09140.1	AT1G09140	5	5	4	28.6	28.6	23.8	28.352	0	11.958	67318000	16	15	0.103704	NaN	NaN	3	3	6	1	0.307692	1.30769	HC	RNA.processing.splicing	SF2/ASF-like splicing modulator (SRP30) | chr1:2942564-2945961 REVERSE	PF00076,PF00076	27	27.1	nucleus	N	X	n.a	n.a	n.a	0	0	0	0
AT1G15280.1;AT1G15280.2	AT1G15280	2	2	2	5.5	5.5	5.5	63.307	0	32.618	45588000	28	5	-0.838153	NaN	NaN	3	3	6	1	0.307692	1.30769	HC	not assigned.no ontology.glycine rich proteins	glycine-rich protein | chr1:5252317-5256751 FORWARD	PF09405	35	35	nucleus	N	X	n.a	n.a	n.a	0	0	0	0
AT1G15420.2;AT1G15420.1	AT1G15420	1	1	1	5.4	5.4	5.4	24.213	0	7.2703	225010000	16	9	0.0386291	NaN	NaN	3	3	6	1	0.307692	1.30769	HC	not assigned.no ontology	unknown protein | chr1:5301613-5303390 REVERSE	PF04003	35	35	nucleus	N	X	n.a	n.a	n.a	0	0	0	0
AT1G15440.2;AT1G15440.1	AT1G15440	6	6	6	8.1	8.1	8.1	95.903	0	11.731	589910000	43	14	-0.314119	NaN	NaN	3	3	6	1	0.307692	1.30769	HC	not assigned.no ontology	transducin family protein / WD-40 repeat family protein | chr1:5306061-5309514 REVERSE	PF00400,PF00400,PF00400,PF00400,PF04003	35	35	nucleus,cytosol	N,C	X	n.a	n.a	n.a	0	0	0	0
AT1G15940.1	AT1G15940	5	5	5	7.2	7.2	7.2	109.59	0	12.494	58991000	59	7	-1.5732	NaN	NaN	3	3	6	1	0.307692	1.30769	HC	not assigned.no ontology	binding | chr1:5473565-5478259 FORWARD	#N/A	35	35	nucleus	N	X	n.a	n.a	n.a	0	0	0	0
AT1G18850.1	AT1G18850	3	3	3	9.5	9.5	9.5	43.948	0	6.8816	44418000	21	7	-0.432283	NaN	NaN	3	3	6	1	0.307692	1.30769	HC	not assigned.unknown	unknown protein | chr1:6504806-6506424 REVERSE	#N/A	35	35	nucleus	N	X	n.a	n.a	n.a	0	0	0	0
AT1G18950.1;AT1G18950.3;AT1G18950.2	AT1G18950	1	1	1	2.4	2.4	2.4	86.249	0.0015198	2.7636	15865000	36	1	-1.29018	NaN	NaN	3	3	6	1	0.307692	1.30769	HC	protein.aa activation	aminoacyl-tRNA synthetase family | chr1:6546399-6551887 FORWARD	PF02791,PF15612	29	29.1	nucleus	N	X	n.a	n.a	n.a	0	0	0	0
AT1G19430.1;AT1G19430.3	AT1G19430	3	3	3	5.7	5.7	5.7	82.661	0	17.319	101770000	37	9	-0.874965	NaN	NaN	3	3	6	1	0.307692	1.30769	HC	stress.abiotic.drought/salt	dehydration-responsive protein-related | chr1:6724573-6728040 REVERSE	PF03141	20	20.2	golgi	G	X	n.a	n.a	n.a	0	0	0	0
AT1G19880.1	AT1G19880	2	2	2	5.2	5.2	5.2	57.841	0.0015177	2.751	26313000	22	5	-0.600889	NaN	NaN	3	3	6	1	0.307692	1.30769	HC	cell.division	regulator of chromosome condensation (RCC1) family protein | chr1:6900415-6904069 REVERSE	PF00415,PF00415,PF00415,PF00415,PF00415	31	31.2	nucleus	N	X	n.a	n.a	n.a	0	0	0	0
AT1G20670.1	AT1G20670	3	3	3	6.7	6.7	6.7	72.955	0	5.3863	39082000	39	10	-1.24204	NaN	NaN	3	3	6	1	0.307692	1.30769	HC	RNA.regulation of transcription.Bromodomain proteins	DNA-binding bromodomain-containing protein | chr1:7164190-7168021 REVERSE	PF00439	27	27.3	nucleus	N	X	n.a	n.a	n.a	0	0	0	0
AT1G20920.7;AT1G20920.6;AT1G20920.5;AT1G20920.4;AT1G20920.3;AT1G20920.1	AT1G20920	6	6	6	3.9	3.9	3.9	133.03	0	12.432	99760000	57	18	-1.14968	NaN	NaN	3	3	6	1	0.307692	1.30769	HC	RNA.processing.RNA helicase	DEAD box RNA helicase, putative | chr1:7285114-7289778 FORWARD	PF00270,PF00271	27	27.1	nucleus,cytosol	N,C	X	n.a	n.a	n.a	0	0	0	0
AT1G22970.1;AT1G22970.4;AT1G22970.2;AT1G22970.3	AT1G22970	2	2	2	10.1	10.1	10.1	39.399	0	10.91	31788000	16	3	-0.641138	NaN	NaN	3	3	6	1	0.307692	1.30769	HC	not assigned.unknown	unknown protein | chr1:8130716-8132208 REVERSE	PF13324	35	35	nucleus	N	X	n.a	n.a	n.a	0	0	0	0
AT1G23280.1	AT1G23280	2	2	2	9.9	9.9	9.9	35.759	0	10.235	27932000	15	2	-0.708303	NaN	NaN	3	3	6	1	0.307692	1.30769	HC	RNA.regulation of transcription.unclassified	MAK16 protein-related | chr1:8260865-8262772 REVERSE	PF01778,PF04874	27	27.3	nucleus	N	X	n.a	n.a	n.a	0	0	0	0
AT1G24260.1;AT1G24260.3;AT1G24260.2	AT1G24260	2	2	2	10.8	10.8	10.8	28.967	0	6.8677	8331600	10	7	-0.0526844	NaN	NaN	3	3	6	1	0.307692	1.30769	HC	RNA.regulation of transcription.MADS box transcription factor family	Symbols: SEP3, AGL9 | SEP3 (SEPALLATA3); DNA binding / protein binding / transcription factor | chr1:8593642-8596098 REVERSE	PF00319,PF01486	27	27.3	nucleus	N	X	n.a	n.a	n.a	0	0	0	0
AT1G26470.1	AT1G26470	2	2	2	21.8	21.8	21.8	15.209	0	33.341	216540000	9	15	0.183813	NaN	NaN	3	3	6	1	0.307692	1.30769	HC	not assigned.unknown	FUNCTIONS IN: molecular_function unknown; INVOLVED IN: regulation of transcription; LOCATED IN: nucleus, H4/H2A histone acetyltransferase complex; EXPRESSED IN: 23 plant structures; EXPRESSED DURING: 15 growth stages; CONTAINS InterPro DOMAIN/s: CT20 (InterPro:IPR012423); Has 39 Blast hits to 39 proteins in 17 species: Archae - 0; Bacteria - 0; Metazoa - 24; Fungi - 0; Plants - 15; Viruses - 0; O…	#N/A	35	35	nucleus	N	X	n.a	n.a	n.a	0	0	0	0
AT1G27300.1	AT1G27300	2	2	2	20.5	20.5	20.5	22.42	0	64.329	115970000	8	10	0.0750823	NaN	NaN	3	3	6	1	0.307692	1.30769	HC	not assigned.unknown	unknown protein | chr1:9483157-9484368 FORWARD	#N/A	35	35	golgi	G	X	n.a	n.a	n.a	0	0	0	0
AT1G27595.1;AT1G27595.2;AT1G27570.1	AT1G27595	2	2	2	1.6	1.6	1.6	145.45	0.0044085	2.3042	21258000	61	1	-1.4902	NaN	NaN	3	3	6	1	0.307692	1.30769	HC	RNA.processing.3' end processing.Symplekin	EXPRESSED IN: 22 plant structures; EXPRESSED DURING: 15 growth stages; BEST Arabidopsis thaliana protein match is: ESP4 (ENHANCED SILENCING PHENOTYPE 4); binding (TAIR:AT5G01400.1); Has 529 Blast hits to 235 proteins in 85 species: Archae - 0; Bacteria - 3; Metazoa - 125; Fungi - 41; Plants - 31; Viruses - 0; Other Eukaryotes - 329 (source: NCBI BLink). | chr1:9596360-9603255 FORWARD	PF11935,PF12295	27	27.1	nucleus	N	X	n.a	n.a	n.a	0	0	0	0
AT1G28420.1	AT1G28420	2	2	2	1.8	1.8	1.8	191.99	0.0037003	2.3888	115130000	81	3	-1.03337	NaN	NaN	3	3	6	1	0.307692	1.30769	HC	RNA.regulation of transcription.HB,Homeobox transcription factor family	Symbols: HB-1 | HB-1 (homeobox-1); transcription factor | chr1:9979802-9987638 FORWARD	PF00046,PF02791,PF05066,PF15612,PF15613	27	27.3	nucleus	N	X	n.a	n.a	n.a	0	0	0	0
AT1G29030.2;AT1G29030.1	AT1G29030	1	1	1	2.1	2.1	2.1	59.8	0.0081967	1.9671	28428000	35	1	-1.25128	NaN	NaN	3	3	6	1	0.307692	1.30769	HC	development.unspecified	apoptosis inhibitory 5 (API5) family protein | chr1:10129035-10133961 REVERSE	PF05918	33	33.99	nucleus	N	X	n.a	n.a	n.a	0	0	0	0
AT1G29060.2;AT1G29060.1;AT4G14600.1	AT1G29060	1	1	1	12.9	12.9	12.9	10.823	0.00020383	3.9288	25320000	5	3	0.00616482	NaN	NaN	3	3	6	1	0.307692	1.30769	HC	not assigned.unknown	FUNCTIONS IN: molecular_function unknown; INVOLVED IN: biological_process unknown; EXPRESSED IN: 24 plant structures; EXPRESSED DURING: 14 growth stages; CONTAINS InterPro DOMAIN/s: Target SNARE coiled-coil region (InterPro:IPR000727); BEST Arabidopsis thaliana protein match is: unknown protein (TAIR:AT4G14600.1); Has 95 Blast hits to 95 proteins in 34 species: Archae - 0; Bacteria - 0; Metazoa -…	#N/A	35	35	golgi	G	X	n.a	n.a	n.a	0	0	0	0
AT1G29320.1;AT1G29320.2	AT1G29320	4	4	4	7.5	7.5	7.5	52.27	0	6.8728	30323000	20	8	-0.526579	NaN	NaN	3	3	6	1	0.307692	1.30769	HC	not assigned.no ontology	transducin family protein / WD-40 repeat family protein | chr1:10255321-10258343 FORWARD	#N/A	35	35	nucleus	N	X	n.a	n.a	n.a	0	0	0	0
AT1G31280.1	AT1G31280	3	3	3	3.3	3.3	3.3	113.42	0.00020568	4.0557	18104000	59	4	-1.21637	NaN	NaN	3	3	6	1	0.307692	1.30769	HC	development.unspecified	Symbols: AGO2 | AGO2 (argonaute 2); nucleic acid binding | chr1:11181711-11185344 FORWARD	PF02171,PF16488,PF02170,PF08699,PF16486	33	33.99	cytosol	C	X	n.a	n.a	n.a	0	0	0	0
AT1G32130.1;AT1G32130.2	AT1G32130	8	8	8	19.9	19.9	19.9	57.424	0	50.44	345240000	22	31	-0.449039	NaN	NaN	3	3	6	1	0.307692	1.30769	HC	RNA.regulation of transcription.unclassified	FUNCTIONS IN: molecular_function unknown; INVOLVED IN: biological_process unknown; LOCATED IN: cellular_component unknown; EXPRESSED IN: 25 plant structures; EXPRESSED DURING: 15 growth stages; CONTAINS InterPro DOMAIN/s: TFIIS N-terminal (InterPro:IPR017923), IWS1, C-terminal (InterPro:IPR008654); BEST Arabidopsis thaliana protein match is: IWS1 C-terminus family protein (TAIR:AT4G19000.1); Has …	PF08711	27	27.3	nucleus	N	X	n.a	n.a	n.a	0	0	0	0
AT1G32490.2;AT1G32490.1	AT1G32490	7	7	7	8.3	8.3	8.3	117.58	0	15.979	48361000	61	6	-1.48671	NaN	NaN	3	3	6	1	0.307692	1.30769	HC	RNA.processing.RNA helicase	Symbols: EMB2733, ESP3 | ESP3 (ENHANCED SILENCING PHENOTYPE 3); ATP binding / ATP-dependent RNA helicase/ ATP-dependent helicase/ helicase/ nucleic acid binding | chr1:11742054-11749775 REVERSE	PF00271,PF04408,PF07717	27	27.1	nucleus	N	X	n.a	n.a	n.a	0	0	0	0
AT1G32690.1	AT1G32690	1	1	1	11	11	11	21.554	0.0042349	2.3227	285870000	8	5	1.00417	NaN	NaN	3	3	6	1	0.307692	1.30769	HC	not assigned.unknown	unknown protein | chr1:11820908-11821710 REVERSE	#N/A	35	35	nucleus	N	X	n.a	n.a	n.a	0	0	0	0
AT1G33240.3;AT1G33240.2;AT1G33240.1	AT1G33240	2	2	2	3.4	3.4	3.4	65.442	0.0018914	2.7025	18970000	20	4	-0.0958622	NaN	NaN	3	3	6	1	0.307692	1.30769	HC	RNA.regulation of transcription.Trihelix, Triple-Helix transcription factor family	Symbols: AT-GTL1, AT-GTL2 | AT-GTL1 (GT2-LIKE 1); DNA binding / transcription factor | chr1:12051471-12054546 REVERSE	PF13837,PF13837	27	27.3	nucleus	N	X	n.a	n.a	n.a	0	0	0	0
AT1G33410.1;AT1G33410.2	AT1G33410	3	3	3	2.5	2.5	2.5	168.92	0	6.9645	10430000	77	7	-1.16007	NaN	NaN	3	3	6	1	0.307692	1.30769	HC	not assigned.unknown	Symbols: SAR1, NUP160, ATNUP160 | SAR1 (suppressor of auxin resistance1) | chr1:12109590-12118828 REVERSE	PF11715,PF17238	35	35	nucleus,cytosol	N,C	X	n.a	NUP160	outer ring	0	0	0	0
AT1G35220.7;AT1G35220.4;AT1G35220.6;AT1G35220.5;AT1G35220.3;AT1G35220.2;AT1G35220.1	AT1G35220	1	1	1	1.2	1.2	1.2	99.813	0.0001955	3.2026	57579000	43	4	-1.14742	NaN	NaN	3	3	6	1	0.307692	1.30769	HC	not assigned.unknown	unknown protein | chr1:12908914-12914802 FORWARD	PF14648,PF14648,PF14647	35	35	golgi	G	X	n.a	n.a	n.a	0	0	0	0
AT1G47970.1	AT1G47970	3	3	3	28.8	28.8	28.8	21.847	0	86.532	154840000	3	7	0.847921	NaN	NaN	3	3	6	1	0.307692	1.30769	HC	not assigned.unknown	unknown protein | chr1:17687269-17688816 FORWARD	#N/A	35	35	nucleus	N	X	n.a	n.a	n.a	0	0	0	0
AT1G50920.1	AT1G50920	4	4	4	8.5	8.5	8.5	76.848	0	11.087	76581000	33	9	-0.905228	NaN	NaN	3	3	6	1	0.307692	1.30769	HC	signalling.G-proteins	GTP-binding protein-related | chr1:18870139-18872930 FORWARD	PF06858,PF08155,PF17835	30	30.5	cytosol	C	X	n.a	n.a	n.a	0	0	0	0
AT1G52500.2	AT1G52500	2	2	2	11.3	11.3	11.3	43.193	0	9.6327	77012000	16	4	-0.458868	NaN	NaN	3	3	6	1	0.307692	1.30769	HC	DNA.repair	Symbols: FPG-1, ATFPG-1, ATMMH-1 | ATMMH-1 (ARABIDOPSIS THALIANA MUTM HOMOLOG-1); DNA N-glycosylase | chr1:19559983-19563113 FORWARD	PF01149,PF06831	28	28.2	nucleus	N	X	n.a	n.a	n.a	0	0	0	0
AT3G15460.1;AT1G52930.1	AT3G15460	2	2	2	6.3	6.3	6.3	36.35	0	4.5025	77906000	19	7	-0.528956	NaN	NaN	3	3	6	1	0.307692	1.30769	HC	protein.synthesis.ribosome biogenesis.BRIX	brix domain-containing protein | chr3:5214084-5216261 REVERSE	PF04427	29	29.2	nucleus	N	X	n.a	n.a	n.a	0	0	0	0
AT1G53165.1;AT1G53165.2;AT1G53165.3	AT1G53165	2	2	2	2.9	2.9	2.9	75.446	0.0002061	4.0985	43265000	39	3	-1.15037	NaN	NaN	3	3	6	1	0.307692	1.30769	HC	signalling.kinase.cytoplasmatic kinase	Symbols: ATMAP4K ALPHA1 | ATMAP4K ALPHA1; ATP binding / kinase/ protein kinase/ protein serine/threonine kinase/ protein tyrosine kinase | chr1:19813804-19819564 FORWARD	PF00069	30	30.30	nucleus	N	X	n.a	n.a	n.a	0	0	0	0
AT1G55540.1;AT1G55540.2	AT1G55540	4	4	4	2.9	2.9	2.9	192.57	0	5.6719	1142200000	76	11	-0.240807	NaN	NaN	3	3	6	1	0.307692	1.30769	HC	development.unspecified	Symbols: emb1011 | emb1011 (embryo defective 1011) | chr1:20734608-20738275 REVERSE	#N/A	33	33.99	nucleus	N	X	n.a	NUP214	cytoplasmic NUP	0	0	1	0
AT1G56660.2;AT1G56660.1	AT1G56660	5	5	5	8.6	8.6	8.6	60.748	0	10.529	64839000	24	8	-0.637942	NaN	NaN	3	3	6	1	0.307692	1.30769	HC	not assigned.unknown	unknown protein | chr1:21237888-21240558 FORWARD	#N/A	35	35	nucleus	N	X	n.a	n.a	n.a	0	0	0	0
AT1G59600.1	AT1G59600	3	3	3	13.3	13.3	13.3	37.573	0	10.481	54955000	18	9	-0.338877	NaN	NaN	3	3	6	1	0.307692	1.30769	HC	not assigned.no ontology	Symbols: ZCW7 | ZCW7 | chr1:21889695-21891962 REVERSE	#N/A	35	35	nucleus	N	X	n.a	n.a	n.a	0	0	0	0
AT1G59890.4;AT1G59890.3;AT1G59890.1;AT1G59890.2	AT1G59890	3	2	2	2.7	1.9	1.9	131.36	0.00058072	3.0899	431190000	68	6	-0.176737	NaN	NaN	3	3	6	1	0.307692	1.30769	HC	RNA.regulation of transcription.putative transcription regulator	Symbols: SNL5 | SNL5 (SIN3-LIKE 5) | chr1:22043830-22051061 FORWARD	PF16879,PF02671,PF02671,PF08295	27	27.3	nucleus	N	X	n.a	n.a	n.a	0	0	0	0
AT1G60170.1	AT1G60170	2	2	2	5.6	5.6	5.6	52.644	0.00020653	4.117	29678000	22	4	-0.870188	NaN	NaN	3	3	6	1	0.307692	1.30769	HC	RNA.processing	Symbols: emb1220 | emb1220 (embryo defective 1220) | chr1:22192773-22195400 FORWARD	PF01798,PF09785	27	27.1	nucleus	N	X	n.a	n.a	n.a	0	0	0	0
AT1G60640.7;AT1G60640.6;AT1G60640.5;AT1G60640.4;AT1G60640.3;AT1G60640.2;AT1G60640.1	AT1G60640	2	2	2	7.8	7.8	7.8	29.071	0	19.398	50927000	5	6	0.394164	NaN	NaN	3	3	6	1	0.307692	1.30769	HC	not assigned.unknown	unknown protein | chr1:22337375-22339672 REVERSE	#N/A	35	35	nucleus	N	X	n.a	n.a	n.a	0	0	0	0
AT1G60650.4;AT1G60650.3;AT1G60650.2;AT1G60650.1	AT1G60650	7	7	7	20.5	20.5	20.5	29.378	0	9.2717	47569000	11	12	-0.308358	NaN	NaN	3	3	6	1	0.307692	1.30769	HC	RNA.RNA binding	glycine-rich RNA-binding protein, putative | chr1:22339809-22342297 FORWARD	PF00076,PF00098	27	27.4	nucleus	N	X	n.a	n.a	n.a	0	0	0	0
AT1G61040.3;AT1G61040.2;AT1G61040.1	AT1G61040	5	5	5	8.7	8.7	8.7	71.319	0	8.7102	100260000	30	11	-0.778303	NaN	NaN	3	3	6	1	0.307692	1.30769	HC	development.unspecified	Symbols: VIP5 | VIP5 (vernalization independence 5); DNA binding | chr1:22483207-22485969 FORWARD	PF03126	33	33.99	nucleus	N	X	n.a	n.a	n.a	0	0	0	0
AT1G61690.1	AT1G61690	1	1	1	1.4	1.4	1.4	128.94	0	11.037	14137000	55	2	-1.50516	NaN	NaN	3	3	6	1	0.307692	1.30769	HC	not assigned.no ontology.pentatricopeptide (PPR) repeat-containing protein	phosphoinositide binding | chr1:22782607-22786859 REVERSE	PF01363	35	35	nucleus	N	X	n.a	n.a	n.a	0	0	0	0
AT1G62330.1	AT1G62330	2	2	2	3.4	3.4	3.4	73.295	0.00019802	3.4271	32368000	35	2	-0.86786	NaN	NaN	3	3	6	1	0.307692	1.30769	HC	not assigned.unknown	unknown protein | chr1:23046893-23050193 FORWARD	PF10250	35	35	golgi	G	X	n.a	n.a	n.a	0	0	0	0
AT1G63810.2;AT1G63810.1	AT1G63810	5	5	5	5.1	5.1	5.1	120.15	0	11.406	57385000	54	7	-1.3664	NaN	NaN	3	3	6	1	0.307692	1.30769	HC	not assigned.no ontology	FUNCTIONS IN: molecular_function unknown; INVOLVED IN: biological_process unknown; LOCATED IN: cellular_component unknown; EXPRESSED IN: 21 plant structures; EXPRESSED DURING: 13 growth stages; CONTAINS InterPro DOMAIN/s: Nrap protein (InterPro:IPR005554); Has 268 Blast hits to 263 proteins in 124 species: Archae - 3; Bacteria - 0; Metazoa - 116; Fungi - 89; Plants - 17; Viruses - 0; Other Eukary…	PF17406,PF17405,PF17407,PF17403,PF17404,PF03813	35	35	nucleus	N	X	n.a	n.a	n.a	0	0	0	0
AT1G63960.1;AT1G63960.2	AT1G63960	1	1	1	13.9	13.9	13.9	11.747	0.0059772	2.1562	37813000	4	6	-0.123998	NaN	NaN	3	3	6	1	0.307692	1.30769	HC	not assigned.unknown	unknown protein | chr1:23738201-23738506 FORWARD	#N/A	35	35	nucleus	N	X	n.a	n.a	n.a	0	0	0	0
AT1G65200.1	AT1G65200	1	1	1	1.1	1.1	1.1	126.53	0.00076894	2.9369	191650000	58	3	-0.224124	NaN	NaN	3	3	6	1	0.307692	1.30769	HC	protein.degradation.ubiquitin	ubiquitin carboxyl-terminal hydrolase-related | chr1:24218470-24222789 REVERSE	PF04781,PF04780	29	29.5.11	nucleus	N	X	n.a	n.a	n.a	0	0	0	0
AT1G67580.2;AT1G67580.1	AT1G67580	2	2	2	3.6	3.6	3.6	85.25	0.005117	2.2417	21479000	47	3	-1.09724	NaN	NaN	3	3	6	1	0.307692	1.30769	HC	signalling.kinase.cyclin dependent kinase	protein kinase family protein | chr1:25327284-25331379 REVERSE	PF00069	30	30.30.3	nucleus	N	X	n.a	n.a	n.a	0	0	0	0
AT1G69010.1	AT1G69010	2	2	2	8.4	8.4	8.4	34.487	0	25.422	70597000	13	5	0.0185429	NaN	NaN	3	3	6	1	0.307692	1.30769	HC	RNA.regulation of transcription.bHLH,Basic Helix-Loop-Helix family	Symbols: BIM2 | BIM2 (BES1-interacting Myc-like protein 2); DNA binding / transcription factor | chr1:25941675-25943836 FORWARD	PF00010	27	27.3	nucleus	N	X	n.a	n.a	n.a	0	0	0	0
AT1G69070.1;AT1G69070.2	AT1G69070	2	2	2	3.2	3.2	3.2	103.64	0	8.6501	24668000	41	5	-0.988404	NaN	NaN	3	3	6	1	0.307692	1.30769	HC	not assigned.unknown	FUNCTIONS IN: molecular_function unknown; INVOLVED IN: biological_process unknown; LOCATED IN: cellular_component unknown; EXPRESSED IN: 23 plant structures; EXPRESSED DURING: 13 growth stages; CONTAINS InterPro DOMAIN/s: Nop14-like protein (InterPro:IPR007276); Has 64668 Blast hits to 30830 proteins in 1152 species: Archae - 207; Bacteria - 18692; Metazoa - 20758; Fungi - 6782; Plants - 2177; Vi…	PF04147	35	35	nucleus	N	X	n.a	n.a	n.a	0	0	0	0
AT1G71710.2;AT1G71710.1;AT1G34120.5;AT1G34120.4;AT1G34120.1;AT1G34120.2	AT1G71710	2	2	2	3.7	3.7	3.7	73.897	0.00020678	4.1332	63724000	24	4	-0.623465	NaN	NaN	3	3	6	1	0.307692	1.30769	HC	minor CHO metabolism.myo-inositol.poly-phosphatases	inositol polyphosphate 5-phosphatase, putative | chr1:26973567-26976831 REVERSE	PF03372	3	3.4	cytosol,mitochondrion	C,M	X	n.a	n.a	n.a	0	0	0	0
AT1G72440.1	AT1G72440	3	3	3	3.2	3.2	3.2	117.02	0	11.015	18658000	42	3	-1.71017	NaN	NaN	3	3	6	1	0.307692	1.30769	HC	RNA.regulation of transcription.CCAAT box binding factor family, DR1	Symbols: EDA25 | EDA25 (embryo sac development arrest 25) | chr1:27268165-27273596 REVERSE	PF03914	27	27.3	nucleus	N	X	n.a	n.a	n.a	0	0	0	0
AT1G73170.4;AT1G73170.2;AT1G73170.1;AT1G73170.3	AT1G73170	2	2	2	7.7	7.7	7.7	43.481	0	25.702	61474000	22	2	-0.379967	NaN	NaN	3	3	6	1	0.307692	1.30769	HC	protein.degradation	ATP binding / ATP-dependent peptidase/ nucleoside-triphosphatase/ nucleotide binding / serine-type endopeptidase | chr1:27511661-27514797 REVERSE	PF00004	29	29.5	plastid,cytosol	P,C	X	n.a	n.a	n.a	0	0	0	0
AT1G76880.1	AT1G76880	3	3	2	5.5	5.5	3.5	67.878	0	6.7498	151080000	17	17	-0.386081	NaN	NaN	3	3	6	1	0.307692	1.30769	HC	RNA.regulation of transcription.Trihelix, Triple-Helix transcription factor family	trihelix DNA-binding protein, putative | chr1:28865500-28868225 FORWARD	PF13837,PF13837	27	27.3	nucleus	N	X	n.a	n.a	n.a	0	0	0	0
AT1G77420.1	AT1G77420	3	3	3	7.9	7.9	7.9	42.819	0.00020717	4.1602	13514000	19	2	-0.575865	NaN	NaN	3	3	6	1	0.307692	1.30769	HC	lipid metabolism.lipid degradation.lysophospholipases	hydrolase, alpha/beta fold family protein | chr1:29093499-29095716 FORWARD	PF12146	11	11.9	vacuole	V	X	n.a	n.a	n.a	0	0	0	0
AT1G78240.2;AT1G78240.1	AT1G78240	2	2	2	3.1	3.1	3.1	77.896	0.00020687	4.1341	17799000	40	3	-1.46383	NaN	NaN	3	3	6	1	0.307692	1.30769	HC	stress.abiotic.drought/salt	Symbols: TSD2, QUA2 | TSD2 (TUMOROUS SHOOT DEVELOPMENT 2); methyltransferase | chr1:29432829-29436484 REVERSE	PF03141	20	20.2	golgi	G	X	n.a	n.a	n.a	0	0	0	0
AT1G79200.1	AT1G79200	2	2	2	13.8	13.8	13.8	19.087	0.00020117	3.7232	53988000	7	10	0.277062	NaN	NaN	3	3	6	1	0.307692	1.30769	HC	not assigned.unknown	unknown protein | chr1:29794387-29796040 FORWARD	#N/A	35	35	nucleus	N	X	n.a	n.a	n.a	0	0	0	0
AT1G79350.1	AT1G79350	7	7	7	7.3	7.3	7.3	143.62	0	11.544	29914000	75	17	-0.580263	NaN	NaN	3	3	6	1	0.307692	1.30769	HC	development.unspecified	Symbols: EMB1135 | EMB1135 (embryo defective 1135); DNA binding / protein binding / zinc ion binding | chr1:29844633-29853414 REVERSE	PF00628,PF13871,PF13872	33	33.99	nucleus	N	X	n.a	n.a	n.a	0	0	0	0
AT2G16485.1;AT2G16485.2	AT2G16485	15	15	15	10	10	10	195.05	0	220	1404800000	80	72	-0.393374	NaN	NaN	3	3	6	1	0.307692	1.30769	HC	not assigned.unknown	DNA binding / nucleic acid binding / protein binding / zinc ion binding | chr2:7136944-7145222 REVERSE	PF00642,PF02201,PF02213,PF03126	35	35	nucleus	N	X	n.a	n.a	n.a	0	0	0	0
AT2G18900.1	AT2G18900	2	2	2	3	3	3	88.011	0.0051132	2.2365	8573800	40	4	-0.89682	NaN	NaN	3	3	6	1	0.307692	1.30769	HC	not assigned.no ontology	transducin family protein / WD-40 repeat family protein | chr2:8188257-8192489 REVERSE	PF00400,PF00400	35	35	nucleus	N	X	n.a	n.a	n.a	0	0	0	0
AT2G20900.3;AT2G20900.2;AT2G20900.4;AT2G20900.1	AT2G20900	1	1	1	2.4	2.4	2.4	55.267	0	4.5409	70002000	28	4	-0.510159	NaN	NaN	3	3	6	1	0.307692	1.30769	HC	lipid metabolism.Phospholipid synthesis.diacylglycerol kinase	Symbols: DGK5, ATDGK5 | diacylglycerol kinase, putative | chr2:8989275-8993114 REVERSE	PF00609,PF00781	11	11.3	cytosol	C	X	n.a	n.a	n.a	0	0	0	0
AT2G22795.1;AT2G22795.2;AT2G22795.3	AT2G22795	4	4	4	5.4	5.4	5.4	82.004	0	6.2602	37415000	47	5	-1.71533	NaN	NaN	3	3	6	1	0.307692	1.30769	HC	not assigned.unknown	unknown protein | chr2:9697233-9699897 REVERSE	#N/A	35	35	golgi	G	X	n.a	n.a	n.a	0	0	0	0
AT2G27285.1	AT2G27285	2	2	2	6.8	6.8	6.8	38.084	0.00019592	3.2321	8164600	14	2	-0.860033	NaN	NaN	3	3	6	1	0.307692	1.30769	HC	not assigned.no ontology	unknown protein | chr2:11675960-11678118 REVERSE	PF09745	35	35	nucleus	N	X	n.a	n.a	n.a	0	0	0	0
AT2G28390.1	AT2G28390	6	6	6	11.7	11.7	11.7	66.923	0	8.3966	33382000	28	5	-1.02158	NaN	NaN	3	3	6	1	0.307692	1.30769	HC	not assigned.no ontology	SAND family protein | chr2:12139580-12143465 REVERSE	PF19037,PF19036,PF19038	35	35	nucleus	N	X	n.a	n.a	n.a	0	0	0	0
AT2G30500.3;AT2G30500.2;AT2G30500.1	AT2G30500	5	5	5	12	12	12	60.25	0	8.6942	88592000	26	4	-0.951184	NaN	NaN	3	3	6	1	0.307692	1.30769	HC	protein.postranslational modification	kinase interacting family protein | chr2:12998159-13000102 REVERSE	PF07765	29	29.4	nucleus	N	X	n.a	n.a	n.a	0	0	0	0
AT2G30880.2;AT2G30880.1	AT2G30880	1	1	1	2.9	2.9	2.9	42.338	0.0031534	2.4188	2281300000	20	16	0.410268	NaN	NaN	3	3	6	1	0.307692	1.30769	HC	not assigned.no ontology	pleckstrin homology (PH) domain-containing protein | chr2:13142665-13145916 REVERSE	PF00169	35	35	nucleus,cytosol	N,C	X	n.a	n.a	n.a	0	0	0	0
AT2G33540.2;AT2G33540.1	AT2G33540	2	2	2	2.1	2.1	2.1	108.38	0.0044101	2.3051	268180000	51	4	-0.693285	NaN	NaN	3	3	6	1	0.307692	1.30769	HC	RNA.regulation of transcription	Symbols: CPL3, ATCPL3 | CPL3 (C-TERMINAL DOMAIN PHOSPHATASE-LIKE 3); CTD phosphatase/ phosphoprotein phosphatase | chr2:14203505-14208797 REVERSE	PF12738,PF03031	27	27.3	nucleus	N	X	n.a	n.a	n.a	0	0	0	0
AT2G33550.1	AT2G33550	2	2	2	8.9	8.9	8.9	34.861	0	4.9462	85713000	16	3	-0.0959188	NaN	NaN	3	3	6	1	0.307692	1.30769	HC	not assigned.no ontology	gt-2-related | chr2:14210032-14211588 REVERSE	PF13837	35	35	nucleus	N	X	n.a	n.a	n.a	0	0	0	0
AT2G35530.1	AT2G35530	2	2	2	6.4	6.4	6.4	43.109	0.00058196	3.1105	71123000	9	4	-0.175504	NaN	NaN	3	3	6	1	0.307692	1.30769	HC	RNA.regulation of transcription.bZIP transcription factor family	bZIP transcription factor family protein | chr2:14922962-14926591 REVERSE	PF16596,PF00170,PF07777	27	27.3	nucleus	N	X	n.a	n.a	n.a	0	0	0	0
AT2G35960.1	AT2G35960	7	7	6	34.3	34.3	34.3	23.263	0	29.853	2810600000	12	110	0.43494	NaN	NaN	3	3	6	1	0.307692	1.30769	HC	not assigned.no ontology	Symbols: NHL12 | NHL12 | chr2:15106940-15107993 FORWARD	PF03168	35	35	cytosol	C	X	n.a	n.a	n.a	0	0	0	0
AT2G36340.1	AT2G36340	1	1	1	3.1	3.1	3.1	47.339	0.00020433	3.9472	4543500	23	4	-0.904688	NaN	NaN	3	3	6	1	0.307692	1.30769	HC	RNA.regulation of transcription.GeBP like	DNA-binding storekeeper protein-related | chr2:15235723-15237728 FORWARD	PF04504	27	27.3	nucleus	N	X	n.a	n.a	n.a	0	0	0	0
AT5G50440.2;AT5G50440.1;AT2G36900.3;AT2G36900.2;AT2G36900.1	AT5G50440	2	2	2	7.8	7.8	7.8	25.104	0	6.4107	46047000	8	2	-0.171933	NaN	NaN	3	3	6	1	0.307692	1.30769	HC	cell.vesicle transport	Symbols: MEMB12, ATMEMB12 | MEMB12 (MEMBRIN 12); SNAP receptor | chr5:20537525-20538943 REVERSE	PF12352	31	31.4	golgi	G	X	n.a	n.a	n.a	0	0	0	0
AT2G37080.3;AT2G37080.2;AT2G37080.1	AT2G37080	1	1	1	2.1	2.1	2.1	65.616	0.00095749	2.88	25731000	36	2	-1.33992	NaN	NaN	3	3	6	1	0.307692	1.30769	HC	cell.organisation	myosin heavy chain-related | chr2:15581386-15585186 REVERSE	#N/A	31	31.1	nucleus	N	X	n.a	n.a	n.a	0	0	0	0
AT2G38790.1	AT2G38790	3	3	3	18.1	18.1	18.1	22.541	0	5.8882	83888000	14	4	-0.0975149	NaN	NaN	3	3	6	1	0.307692	1.30769	HC	not assigned.unknown	unknown protein | chr2:16214189-16215264 REVERSE	#N/A	35	35	nucleus	N	X	n.a	n.a	n.a	0	0	0	0
AT2G40010.1	AT2G40010	11	1	1	28.4	4.4	4.4	33.666	0	4.8994	30787000	7	2	-0.0357301	NaN	NaN	3	3	6	1	0.307692	1.30769	HC	protein.synthesis.ribosomal protein.eukaryotic.60S subunit.P0	60S acidic ribosomal protein P0 (RPP0A) | chr2:16708379-16710448 REVERSE	PF00428,PF00466,PF17777	29	29.2.1.2	cytosol	C	X	n.a	n.a	n.a	0	0	0	0
AT2G40360.2;AT2G40360.1	AT2G40360	2	2	2	5.2	5.2	5.2	83.531	0	5.3279	108090000	31	5	-0.662064	NaN	NaN	3	3	6	1	0.307692	1.30769	HC	protein.synthesis.ribosome biogenesis.Pre-rRNA processing and modifications.WD-repeat proteins	transducin family protein / WD-40 repeat family protein | chr2:16852880-16856690 REVERSE	PF08145,PF00400,PF00400,PF00400	29	29.2	nucleus	N	X	n.a	n.a	n.a	0	0	0	0
AT2G41190.2;AT2G41190.1	AT2G41190	3	3	3	7.9	7.9	7.9	56	0	6.0562	72573000	17	4	-0.598451	NaN	NaN	3	3	6	1	0.307692	1.30769	HC	transport.amino acids	amino acid transporter family protein | chr2:17167279-17170407 REVERSE	PF01490	34	34.3	vacuole	V	X	n.a	n.a	n.a	0	0	0	0
AT2G41500.2;AT2G41500.1	AT2G41500	3	3	3	7.2	7.2	7.2	61.841	0	7.0004	106580000	29	8	-0.862909	NaN	NaN	3	3	6	1	0.307692	1.30769	HC	RNA.processing	Symbols: LIS, EMB2776 | EMB2776; nucleotide binding | chr2:17304130-17307426 REVERSE	PF00400,PF00400,PF00400,PF00400,PF00400,PF08799	27	27.1	nucleus	N	X	n.a	n.a	n.a	0	0	0	0
AT2G43640.3;AT2G43640.2;AT2G43640.1	AT2G43640	5	5	5	42	42	42	12.738	0	43.787	314920000	6	16	0.531012	NaN	NaN	3	3	6	1	0.307692	1.30769	HC	protein.targeting.secretory pathway.unspecified	signal recognition particle 14 kDa family protein / SRP14 family protein | chr2:18097406-18099130 REVERSE	PF02290	29	29.3.4	nucleus,cytosol	N,C	X	n.a	n.a	n.a	0	0	0	0
AT2G44710.2;AT2G44710.1;AT2G44710.3;AT2G44710.4	AT2G44710	7	7	7	13.3	13.3	13.3	89.817	0	16.023	82912000	42	14	-0.874016	NaN	NaN	3	3	6	1	0.307692	1.30769	HC	RNA.RNA binding	RNA recognition motif (RRM)-containing protein | chr2:18432719-18437132 FORWARD	PF00076,PF00076,PF00076	27	27.4	nucleus	N	X	n.a	n.a	n.a	0	0	0	0
AT2G44730.1	AT2G44730	2	2	2	6.5	6.5	6.5	40.781	0.001518	2.7528	11563000	17	3	-0.407365	NaN	NaN	3	3	6	1	0.307692	1.30769	HC	RNA.regulation of transcription.Trihelix, Triple-Helix transcription factor family	transcription factor | chr2:18437333-18438565 REVERSE	PF13837	27	27.3	nucleus	N	X	n.a	n.a	n.a	0	0	0	0
AT2G47210.3;AT2G47210.2;AT2G47210.1	AT2G47210	2	2	2	5.9	5.9	5.9	49.823	0.0001967	3.3179	35815000	25	3	-0.689807	NaN	NaN	3	3	6	1	0.307692	1.30769	HC	RNA.regulation of transcription.MYB domain transcription factor family	myb family transcription factor | chr2:19378869-19382418 FORWARD	PF05499,PF16282	27	27.3	nucleus	N	X	n.a	n.a	n.a	0	0	0	0
AT2G47990.1	AT2G47990	6	6	6	19.6	19.6	19.6	58.902	0	44.614	94059000	22	12	-0.165725	NaN	NaN	3	3	6	1	0.307692	1.30769	HC	RNA.transcription	Symbols: SWA1, EDA13, EDA19 | SWA1 (SLOW WALKER1); nucleotide binding | chr2:19636867-19638678 REVERSE	PF00400,PF00400,PF09384	27	27.2	nucleus	N	X	n.a	n.a	n.a	0	0	0	0
AT3G01160.1	AT3G01160	5	5	5	9.3	9.3	9.3	81.492	0	12.27	153780000	33	14	-0.689307	NaN	NaN	3	3	6	1	0.307692	1.30769	HC	not assigned.unknown	unknown protein | chr3:54541-57462 REVERSE	PF08159	35	35	nucleus	N	X	n.a	n.a	n.a	0	0	0	0
AT3G02220.1	AT3G02220	1	1	1	7	7	7	25.615	0	5.9958	40842000	10	5	-0.0876431	NaN	NaN	3	3	6	1	0.307692	1.30769	HC	not assigned.unknown	unknown protein | chr3:412069-413634 REVERSE	PF10217	35	35	nucleus	N	X	n.a	n.a	n.a	0	0	0	0
AT3G03110.1	AT3G03110	10	2	2	10.3	2.1	2.1	123.19	0	8.8478	51685000	47	1	-1.23849	NaN	NaN	3	3	6	1	0.307692	1.30769	HC	protein.targeting.nucleus	Symbols: XPO1B, CRM1B | XPO1B; binding / protein transporter | chr3:708936-717093 FORWARD	PF18787,PF03810,PF18784,PF08767,PF08389,PF18777	29	29.3.1	nucleus	N	X	n.a	0	importin-beta	0	0	0	0
AT4G02195.1;AT3G05710.1;AT3G05710.2	AT4G02195	1	1	1	4.3	4.3	4.3	36.432	0	10.162	21774000	13	3	-0.525867	NaN	NaN	3	3	6	1	0.307692	1.30769	HC	cell.vesicle transport	Symbols: SYP42, TLG2B, ATSYP42, ATTLG2B | SYP42 (SYNTAXIN OF PLANTS 42); SNAP receptor | chr4:970007-972307 REVERSE	PF05739	31	31.4	golgi	G	X	n.a	n.a	n.a	0	0	0	0
AT3G09560.4;AT3G09560.3;AT3G09560.2;AT3G09560.1	AT3G09560	4	4	4	6.6	6.6	6.6	101	0	9.8054	72552000	44	7	-1.1451	NaN	NaN	3	3	6	1	0.307692	1.30769	HC	not assigned.unknown	lipin family protein | chr3:2934617-2939456 REVERSE	PF04571,PF16876,PF08235	35	35	nucleus	N	X	n.a	n.a	n.a	0	0	0	0
AT3G09790.2;AT3G09790.1	AT3G09790	8	1	1	13	4.3	4.3	71.768	0	11.144	41496000	41	2	-0.897481	NaN	NaN	3	3	6	1	0.307692	1.30769	HC	protein.degradation.ubiquitin.ubiquitin	Symbols: UBQ8 | UBQ8; protein binding | chr3:3003862-3006192 REVERSE	PF00240,PF00240,PF00240,PF00240,PF00240,PF00240,PF00240,PF00240	29	29.5.11.1	cytosol	C	X	n.a	n.a	n.a	0	0	0	0
AT3G09880.1	AT3G09880	3	2	2	9.6	7	7	57.471	0.00076864	2.9327	22616000	27	3	-1.23099	NaN	NaN	3	3	6	1	0.307692	1.30769	HC	protein.postranslational modification	Symbols: ATB' BETA | ATB' BETA; protein phosphatase type 2A regulator | chr3:3029511-3032256 FORWARD	PF01603	29	29.4	nucleus	N	X	n.a	n.a	n.a	0	0	0	0
AT3G11100.1	AT3G11100	2	2	2	5.6	5.6	5.6	28.386	0	4.8614	13604000	11	6	-0.397609	NaN	NaN	3	3	6	1	0.307692	1.30769	HC	RNA.regulation of transcription.Trihelix, Triple-Helix transcription factor family	transcription factor | chr3:3476187-3477405 REVERSE	PF13837	27	27.3	nucleus	N	X	n.a	n.a	n.a	0	0	0	0
AT3G11964.1;AT3G11964.2	AT3G11964	5	5	5	2.5	2.5	2.5	211.6	0	4.3927	13548000	100	5	-1.62699	NaN	NaN	3	3	6	1	0.307692	1.30769	HC	not assigned.no ontology.S RNA-binding domain-containing protein	RNA binding | chr3:3793957-3806626 REVERSE	PF00575,PF00575,PF00575,PF00575,PF00575,PF05843	35	35	nucleus	N	X	n.a	n.a	n.a	0	0	0	0
AT3G13670.1	AT3G13670	3	3	3	5.4	5.4	5.4	78.639	0	8.4681	12247000	39	3	-1.30367	NaN	NaN	3	3	6	1	0.307692	1.30769	HC	signalling.kinase.cytoplasmatic kinase	protein kinase family protein | chr3:4469222-4473547 FORWARD	PF00069	30	30.30	nucleus	N	X	n.a	n.a	n.a	0	0	0	0
AT3G14890.1;AT3G14890.2	AT3G14890	4	4	4	8.5	8.5	8.5	77.386	0	16.182	28798000	43	7	-0.816015	NaN	NaN	3	3	6	1	0.307692	1.30769	HC	DNA.repair	phosphoesterase | chr3:5008742-5013265 FORWARD	PF00645,PF00645,PF00645,PF08645	28	28.2	nucleus	N	X	n.a	n.a	n.a	0	0	0	0
AT3G17750.1	AT3G17750	3	3	1	3.4	3.4	1.4	127.24	0	6.0159	6461000	55	5	-1.14836	NaN	NaN	3	3	6	1	0.307692	1.30769	HC	signalling.kinase.cytoplasmatic kinase	protein kinase family protein | chr3:6073769-6078722 FORWARD	PF00069	30	30.30	nucleus	N	X	n.a	n.a	n.a	0	0	0	0
AT3G18520.4;AT3G18520.1;AT3G18520.2;AT3G18520.3	AT3G18520	2	2	2	5.2	5.2	5.2	55.732	0.00019968	3.5631	2098500	21	1	-1.17369	NaN	NaN	3	3	6	1	0.307692	1.30769	HC	RNA.regulation of transcription.HDA	Symbols: HDA15, ATHDA15 | HDA15; histone deacetylase | chr3:6361176-6365615 FORWARD	PF00850	27	27.3	nucleus	N	X	n.a	n.a	n.a	0	0	0	0
AT3G18610.2;AT3G18610.3;AT3G18610.1	AT3G18610	3	2	2	5	3.5	3.5	62.651	0.00058298	3.1241	31884000	26	3	-1.1939	NaN	NaN	3	3	6	1	0.307692	1.30769	HC	signalling.G-proteins	Symbols: ATRANGAP1, PARLL1 | ATRANGAP1 (RAN GTPASE-ACTIVATING PROTEIN 1); nucleic acid binding / nucleotide binding | chr3:6404083-6407822 REVERSE	PF00076,PF00076	30	30.5	nucleus	N	Likely PD protein	n.a	n.a	n.a	0	0	0	0
AT3G19080.2;AT3G19080.1;AT3G19080.4;AT3G19080.3	AT3G19080	3	3	3	7.4	7.4	7.4	50.09	0	19.801	101850000	23	9	-0.7503	NaN	NaN	3	3	6	1	0.307692	1.30769	HC	not assigned.no ontology	SWIB complex BAF60b domain-containing protein | chr3:6596082-6598667 FORWARD	PF02201,PF02201,PF02201,PF08766	35	35	nucleus	N	X	n.a	n.a	n.a	0	0	0	0
AT3G19120.1	AT3G19120	2	2	2	4.7	4.7	4.7	49.417	0.00020437	3.9477	41065000	18	9	-0.510484	NaN	NaN	3	3	6	1	0.307692	1.30769	HC	not assigned.unknown	unknown protein | chr3:6609412-6611059 REVERSE	PF13359	35	35	nucleus	N	X	n.a	n.a	n.a	0	0	0	0
AT3G19670.4;AT3G19670.3;AT3G19670.2;AT3G19670.1	AT3G19670	2	2	2	2.1	2.1	2.1	111.49	0.0064877	2.1051	3487200	42	4	-1.34421	NaN	NaN	3	3	6	1	0.307692	1.30769	HC	not assigned.no ontology	protein binding | chr3:6828062-6836582 REVERSE	PF00397,PF00397,PF01846,PF01846,PF01846,PF01846	35	35	nucleus	N	X	n.a	n.a	n.a	0	0	0	0
AT3G20550.1	AT3G20550	2	2	2	7.6	7.6	7.6	36.952	0	6.4826	23004000	16	2	-0.517382	NaN	NaN	3	3	6	1	0.307692	1.30769	HC	micro RNA, natural antisense etc	Symbols: DDL | DDL (DAWDLE) | chr3:7174464-7177942 REVERSE	PF00498	32	32	nucleus	N	X	n.a	n.a	n.a	0	0	0	0
AT3G21290.2;AT3G21290.1	AT3G21290	1	1	1	1.3	1.3	1.3	110.88	0.00020525	4.0292	9137200	45	3	-1.54975	NaN	NaN	3	3	6	1	0.307692	1.30769	HC	not assigned.no ontology	dentin sialophosphoprotein-related | chr3:7482131-7488935 FORWARD	PF07303	35	35	nucleus	N	X	n.a	n.a	n.a	0	0	0	0
AT3G21810.2;AT3G21810.1	AT3G21810	3	3	3	7	7	7	47.769	0	6.2333	34116000	22	7	-0.463835	NaN	NaN	3	3	6	1	0.307692	1.30769	HC	RNA.regulation of transcription.unclassified	zinc finger (CCCH-type) family protein | chr3:7684430-7688616 FORWARD	PF00642	27	27.3	nucleus	N	X	n.a	n.a	n.a	0	0	0	0
AT3G22660.1	AT3G22660	1	1	1	4.4	4.4	4.4	33.205	0.00020182	3.7827	32988000	12	3	-0.366737	NaN	NaN	3	3	6	1	0.307692	1.30769	HC	protein.synthesis.ribosome biogenesis.Pre-rRNA processing and modifications.misc	rRNA processing protein-related | chr3:8016051-8017508 REVERSE	PF05890	29	29.2	nucleus	N	X	n.a	n.a	n.a	0	0	0	0
AT3G23100.2;AT3G23100.1	AT3G23100	2	2	2	9.5	9.5	9.5	29.854	0.0002073	4.1698	89114000	16	6	-0.156143	NaN	NaN	3	3	6	1	0.307692	1.30769	HC	DNA.repair	Symbols: XRCC4 | XRCC4; protein C-terminus binding | chr3:8220682-8222148 FORWARD	PF06632	28	28.2	nucleus	N	X	n.a	n.a	n.a	0	0	0	0
AT3G24080.4;AT3G24080.3;AT3G24080.2;AT3G24080.1	AT3G24080	3	3	3	5.9	5.9	5.9	73.758	0.00019976	3.5716	22938000	29	3	-1.03743	NaN	NaN	3	3	6	1	0.307692	1.30769	HC	not assigned.no ontology	KRR1 family protein | chr3:8694961-8697124 REVERSE	PF05178,PF12936	35	35	nucleus	N	X	n.a	n.a	n.a	0	0	0	0
AT3G24490.1	AT3G24490	2	2	2	7.2	7.2	7.2	39.083	0.006483	2.0966	12603000	13	4	-0.427773	NaN	NaN	3	3	6	1	0.307692	1.30769	HC	RNA.regulation of transcription.Trihelix, Triple-Helix transcription factor family	transcription factor | chr3:8910770-8912196 FORWARD	PF13837	27	27.3	nucleus	N	X	n.a	n.a	n.a	0	0	0	0
AT3G25840.1;AT3G25840.2	AT3G25840	2	2	2	2.2	2.2	2.2	107.99	0.0001979	3.4236	38409000	42	6	-0.974179	NaN	NaN	3	3	6	1	0.307692	1.30769	HC	signalling.kinase.cytoplasmatic kinase	protein kinase family protein | chr3:9451861-9457554 REVERSE	PF00069	30	30.30	nucleus	N	X	n.a	n.a	n.a	0	0	0	0
AT3G29400.1	AT3G29400	1	1	1	1.8	1.8	1.8	75.225	0.00020121	3.7335	10991000	32	3	-1.38004	NaN	NaN	3	3	6	1	0.307692	1.30769	HC	cell.vesicle transport	Symbols: ATEXO70E1 | ATEXO70E1 (exocyst subunit EXO70 family protein E1); protein binding | chr3:11297283-11299620 REVERSE	PF03081	31	31.4	cytosol	C	X	n.a	n.a	n.a	0	0	0	0
AT3G44850.1	AT3G44850	1	1	1	4.5	4.5	4.5	60.746	0.00019771	3.3983	54348000	32	4	-0.79065	NaN	NaN	3	3	6	1	0.307692	1.30769	HC	signalling.kinase.cytoplasmatic kinase	protein kinase-related | chr3:16374617-16376931 REVERSE	PF00069,PF00069	30	30.30	nucleus	N	X	n.a	n.a	n.a	0	0	0	0
AT3G49100.2;AT3G49100.1	AT3G49100	4	4	4	39.8	39.8	39.8	12.023	0	10.312	193950000	6	6	0.226651	NaN	NaN	3	3	6	1	0.307692	1.30769	HC	protein.targeting.secretory pathway.unspecified	signal recognition particle 9 kDa protein, putative / SRP9, putative | chr3:18196839-18198457 FORWARD	PF05486	29	29.3.4	cytosol	C	X	n.a	n.a	n.a	0	0	0	0
AT3G50360.1	AT3G50360	3	3	3	22.5	22.5	22.5	19.409	0	10.141	14591000	11	10	0.150862	NaN	NaN	3	3	6	1	0.307692	1.30769	HC	DNA.synthesis/chromatin structure	Symbols: ATCEN2, CEN1 | ATCEN2 (CENTRIN2); calcium ion binding | chr3:18674337-18675712 FORWARD	PF13499,PF13499	28	28.1	cytosol,nucleus	C,N	X	n.a	n.a	n.a	0	0	0	0
AT3G51250.2;AT3G51250.1	AT3G51250	3	3	3	13	13	13	40.986	0	17.018	108200000	18	8	-0.382693	NaN	NaN	3	3	6	1	0.307692	1.30769	HC	development.unspecified	senescence/dehydration-associated protein-related | chr3:19028203-19030676 FORWARD	PF06911	33	33.99	nucleus	N	X	n.a	n.a	n.a	0	0	0	0
AT3G51880.5;AT3G51880.3;AT3G51880.1;AT3G51880.4;AT3G51880.2	AT3G51880	6	6	6	25.3	25.3	25.3	20.265	0	96.951	609260000	7	42	0.291556	NaN	NaN	3	3	6	1	0.307692	1.30769	HC	RNA.regulation of transcription.Nucleosome/chromatin assembly factor group	Symbols: HMGB1, NFD1 | HMGB1 (HIGH MOBILITY GROUP B 1); DNA binding / chromatin binding / structural constituent of chromatin / transcription factor | chr3:19246991-19249095 REVERSE	PF00505	27	27.3	nucleus	N	X	n.a	n.a	n.a	0	0	0	0
AT3G52220.1	AT3G52220	1	1	1	4.6	4.6	4.6	27.54	0.0061427	2.121	19035000	12	2	-0.812366	NaN	NaN	3	3	6	1	0.307692	1.30769	HC	not assigned.unknown	unknown protein | chr3:19369362-19371074 REVERSE	PF10159	35	35	nucleus	N	X	n.a	n.a	n.a	0	0	0	0
AT3G53500.2;AT3G53500.3;AT3G53500.1	AT3G53500	7	6	6	21.5	18.3	18.3	31.823	0	18.701	236840000	11	24	0.450877	NaN	NaN	3	3	6	1	0.307692	1.30769	HC	RNA.RNA binding	Symbols: RSZ32 | zinc knuckle (CCHC-type) family protein | chr3:19834343-19837088 REVERSE	PF00098,PF00098,PF00076	27	27.4	nucleus	N	X	n.a	n.a	n.a	0	0	0	0
AT3G54230.3;AT3G54230.4;AT3G54230.5;AT3G54230.1;AT3G54230.2	AT3G54230	1	1	1	1.9	1.9	1.9	78.755	0.0027891	2.4442	11593000	34	5	-0.7431	NaN	NaN	3	3	6	1	0.307692	1.30769	HC	RNA.RNA binding	nucleic acid binding / nucleotide binding / zinc ion binding | chr3:20073104-20080264 FORWARD	PF00076,PF00076,PF17780,PF01585	27	27.4	nucleus	N	X	n.a	n.a	n.a	0	0	0	0
AT3G54610.1	AT3G54610	2	2	2	4.6	4.6	4.6	63.123	0	9.7993	91705000	27	5	-0.605136	NaN	NaN	3	3	6	1	0.307692	1.30769	HC	RNA.regulation of transcription.Histone acetyltransferases	Symbols: HAT1, GCN5, HAG1, HAC3, HAG01, BGT | GCN5; DNA binding / H3 histone acetyltransferase/ histone acetyltransferase | chr3:20213560-20217653 FORWARD	PF00439,PF00583	27	27.3	nucleus	N	X	n.a	n.a	n.a	0	0	0	0
AT3G55510.2;AT3G55510.1	AT3G55510	1	1	1	3.7	3.7	3.7	59.654	0	7.1661	15099000	23	3	-1.2565	NaN	NaN	3	3	6	1	0.307692	1.30769	HC	not assigned.unknown	Symbols: RBL | RBL (REBELOTE) | chr3:20578978-20582405 FORWARD	PF03715	35	35	nucleus	N	X	n.a	n.a	n.a	0	0	0	0
AT3G55560.1	AT3G55560	2	2	2	15.5	15.5	15.5	32.603	0	34.815	92265000	9	3	0.0771418	NaN	NaN	3	3	6	1	0.307692	1.30769	HC	hormone metabolism.gibberelin.induced-regulated-responsive-activated	Symbols: AGF2 | AGF2 (AT-hook protein of GA feedback 2) | chr3:20604616-20606380 REVERSE	PF03479	17	17.6	nucleus	N	X	n.a	n.a	n.a	0	0	0	0
AT3G57660.2;AT3G57660.1	AT3G57660	1	1	1	1.4	1.4	1.4	186.04	0	5.217	21672000	85	1	-1.79161	NaN	NaN	3	3	6	1	0.307692	1.30769	HC	RNA.transcription	Symbols: NRPA1 | NRPA1; DNA binding / DNA-directed RNA polymerase/ zinc ion binding | chr3:21353746-21362814 FORWARD	PF00623,PF04983,PF04997,PF04998,PF05000	27	27.2	nucleus	N	X	n.a	n.a	n.a	0	0	0	0
AT3G58110.2;AT3G58110.1	AT3G58110	4	4	4	5	5	5	86.804	0	22.719	87408000	35	12	-0.753528	NaN	NaN	3	3	6	1	0.307692	1.30769	HC	not assigned.unknown	unknown protein | chr3:21516745-21519129 FORWARD	#N/A	35	35	nucleus	N	X	n.a	n.a	n.a	0	0	0	0
AT3G58160.4;AT3G58160.3;AT3G58160.2;AT3G58160.5;AT3G58160.1	AT3G58160	1	1	1	0.9	0.9	0.9	134.24	0.0066344	2.0452	43144000	66	3	-1.16601	NaN	NaN	3	3	6	1	0.307692	1.30769	HC	cell.organisation	Symbols: XIJ, ATXIJ, ATMYOS3, MYA3, XI-16 | XIJ; motor | chr3:21534797-21541877 FORWARD	PF00612,PF00612,PF00612,PF00063,PF02736	31	31.1	golgi	G	X	n.a	n.a	n.a	0	0	0	0
AT3G63400.4;AT3G63400.3;AT3G63400.1;AT3G63400.2	AT3G63400	12	12	12	20.9	20.9	20.9	63.54	0	42.919	325930000	22	24	0.199495	NaN	NaN	3	3	6	1	0.307692	1.30769	HC	cell.cycle.peptidylprolyl isomerase	peptidyl-prolyl cis-trans isomerase cyclophilin-type family protein | chr3:23412023-23415659 FORWARD	PF00160	31	31.3	nucleus	N	X	n.a	n.a	n.a	0	0	0	0
AT4G00238.1	AT4G00238	8	8	8	27	27	27	38.186	0	15.761	201410000	16	17	0.0724094	NaN	NaN	3	3	6	1	0.307692	1.30769	HC	RNA.regulation of transcription.GeBP like	DNA-binding storekeeper protein-related | chr4:103823-105217 REVERSE	PF04504	27	27.3	nucleus	N	X	n.a	n.a	n.a	0	0	0	0
AT4G00670.1	AT4G00670	1	1	1	11.4	11.4	11.4	14.089	0.000203	3.8801	2708300	4	3	-0.0885662	NaN	NaN	3	3	6	1	0.307692	1.30769	HC	RNA.regulation of transcription.unclassified	DNA binding | chr4:278316-279186 REVERSE	PF03763	27	27.3	nucleus	N	X	n.a	n.a	n.a	0	0	0	0
AT4G02720.1	AT4G02720	3	3	3	7.8	7.8	7.8	48.462	0	30.808	211990000	23	18	-0.381726	NaN	NaN	3	3	6	1	0.307692	1.30769	HC	not assigned.unknown	unknown protein | chr4:1204303-1205866 REVERSE	PF06047	35	35	nucleus	N	X	n.a	n.a	n.a	0	0	0	0
AT4G08150.1	AT4G08150	1	1	1	3	3	3	45.835	0.0069742	2.0132	7501600	18	2	-1.07103	NaN	NaN	3	3	6	1	0.307692	1.30769	HC	RNA.regulation of transcription.HB,Homeobox transcription factor family	Symbols: KNAT1, BP, BP1 | KNAT1 (KNOTTED-LIKE FROM ARABIDOPSIS THALIANA); transcription factor | chr4:5147700-5150966 REVERSE	PF03789,PF03790,PF03791,PF05920	27	27.3	nucleus	N	X	n.a	n.a	n.a	0	0	0	0
AT4G08350.1	AT4G08350	6	6	6	9.8	9.8	9.8	115.4	0	85.875	149650000	52	12	-1.05338	NaN	NaN	3	3	6	1	0.307692	1.30769	HC	RNA.regulation of transcription.Global transcription factor group	Symbols: GTA02, GTA2 | GTA2 (GLOBAL TRANSCRIPTION FACTOR GROUP A2); structural constituent of ribosome / transcription elongation regulator/ transcription factor | chr4:5286229-5292239 FORWARD	PF00467,PF03439,PF11942	27	27.3	nucleus	N	X	n.a	n.a	n.a	0	0	0	0
AT4G08580.1;AT4G08580.2;AT5G17900.1	AT4G08580	6	6	6	12.6	12.6	12.6	51.171	0	15.595	70828000	15	10	-0.69743	NaN	NaN	3	3	6	1	0.307692	1.30769	HC	cell.organisation	FUNCTIONS IN: molecular_function unknown; INVOLVED IN: biological_process unknown; LOCATED IN: chloroplast; EXPRESSED IN: male gametophyte, pollen tube; EXPRESSED DURING: L mature pollen stage, M germinated pollen stage; CONTAINS InterPro DOMAIN/s: Micro-fibrillar-associated 1, C-terminal (InterPro:IPR009730); BEST Arabidopsis thaliana protein match is: unknown protein (TAIR:AT5G17900.1); Has 390…	PF06991	31	31.1	nucleus	N	X	n.a	n.a	n.a	0	0	0	0
AT4G11240.1	AT4G11240	1	1	1	4.3	4.3	4.3	36.566	0	5.0643	149470000	20	8	-0.326651	NaN	NaN	3	3	6	1	0.307692	1.30769	HC	protein.postranslational modification	Symbols: TOPP7 | TOPP7; protein serine/threonine phosphatase | chr4:6847112-6849300 FORWARD	PF00149,PF16891	29	29.4	cytosol	C	X	n.a	n.a	n.a	0	0	0	0
AT4G11560.2;AT4G11560.1	AT4G11560	6	6	6	13.7	13.7	13.7	55.471	0	13.021	147320000	28	10	-0.809794	NaN	NaN	3	3	6	1	0.307692	1.30769	HC	RNA.regulation of transcription.putative transcription regulator	bromo-adjacent homology (BAH) domain-containing protein | chr4:6999896-7003493 REVERSE	PF01426,PF07500	27	27.3	nucleus	N	X	n.a	n.a	n.a	0	0	0	0
AT4G14230.1	AT4G14230	2	2	1	5.1	5.1	3.2	53.491	0.0020712	2.629	18273000	20	2	-1.08662	NaN	NaN	3	3	6	1	0.307692	1.30769	HC	not assigned.no ontology	CBS domain-containing protein-related | chr4:8200667-8203238 REVERSE	PF01595	35	35	vacuole	V	X	n.a	n.a	n.a	0	0	0	0
AT4G14385.9;AT4G14385.5;AT4G14385.2;AT4G14385.1	AT4G14385	1	1	1	17.3	17.3	17.3	12.121	0	9.095	25237000	4	2	0.199959	NaN	NaN	3	3	6	1	0.307692	1.30769	HC	not assigned.unknown	FUNCTIONS IN: molecular_function unknown; INVOLVED IN: biological_process unknown; LOCATED IN: vacuole; EXPRESSED IN: 24 plant structures; EXPRESSED DURING: 15 growth stages; CONTAINS InterPro DOMAIN/s: Histone H4 acetyltransferase, NuA4 complex, Eaf6 (InterPro:IPR015418); Has 245 Blast hits to 245 proteins in 100 species: Archae - 0; Bacteria - 0; Metazoa - 126; Fungi - 60; Plants - 29; Viruses …	PF09340	35	35	nucleus,cytosol	N,C	X	n.a	n.a	n.a	0	0	0	0
AT4G15415.3;AT4G15415.5;AT4G15415.4;AT4G15415.2;AT4G15415.1;AT3G21650.2;AT3G21650.1	AT4G15415	2	2	2	8.7	8.7	8.7	49.419	0	11.887	11038000	25	2	-1.44019	NaN	NaN	3	3	6	1	0.307692	1.30769	HC	protein.postranslational modification	Symbols: ATB' GAMMA | ATB' GAMMA; poly(U) binding / protein phosphatase type 2A regulator | chr4:8817031-8819693 FORWARD	PF01603	29	29.4	plastid,cytosol	P,C	X	n.a	n.a	n.a	0	0	0	0
AT4G16630.1	AT4G16630	3	3	3	6.3	6.3	6.3	89.354	0	16.286	51565000	40	7	-1.43409	NaN	NaN	3	3	6	1	0.307692	1.30769	HC	protein.synthesis.ribosome biogenesis.Assembly factors.DExD-box helicases	DEAD/DEAH box helicase, putative (RH28) | chr4:9361984-9366748 REVERSE	PF00270,PF00271	29	29.2	nucleus	N	X	n.a	n.a	n.a	0	0	0	0
AT4G18070.4;AT4G18070.3;AT4G18070.1;AT4G18070.7;AT4G18070.6;AT4G18070.5;AT4G18070.2	AT4G18070	2	2	2	12.2	12.2	12.2	27.778	0	15.848	123000000	8	6	-0.202812	NaN	NaN	3	3	6	1	0.307692	1.30769	HC	not assigned.unknown	unknown protein | chr4:10030632-10032963 FORWARD	#N/A	35	35	nucleus	N	X	n.a	n.a	n.a	0	0	0	0
AT4G19120.1;AT4G19120.2;AT4G19120.3	AT4G19120	5	3	3	10.5	5.2	5.2	68.33	0	6.9562	45507000	34	5	-0.760107	NaN	NaN	3	3	6	1	0.307692	1.30769	HC	stress.abiotic.drought/salt	Symbols: ERD3 | ERD3 (early-responsive to dehydration 3) | chr4:10460295-10464174 REVERSE	PF03141	20	20.2	golgi	G	X	n.a	n.a	n.a	0	0	0	0
AT4G19490.2;AT4G19490.1	AT4G19490	3	3	3	3.5	3.5	3.5	113.86	0.00020333	3.9012	50336000	55	5	-1.28013	NaN	NaN	3	3	6	1	0.307692	1.30769	HC	not assigned.unknown	Symbols: ATVPS54, VPS54 | protein binding | chr4:10615796-10623521 FORWARD	PF07928	35	35	golgi,plastid	G,P	X	n.a	n.a	n.a	0	0	0	0
AT4G19610.1	AT4G19610	3	3	3	4.8	4.8	4.8	91.563	0	12.675	103930000	46	7	-0.756131	NaN	NaN	3	3	6	1	0.307692	1.30769	HC	RNA.RNA binding	RNA binding / nucleic acid binding / nucleotide binding | chr4:10677229-10681771 FORWARD	PF00076,PF00076,PF00076,PF00076,PF00076	27	27.4	nucleus	N	X	n.a	n.a	n.a	0	0	0	0
AT4G22320.2;AT4G22320.1	AT4G22320	2	2	2	9.7	9.7	9.7	26.156	0.0045754	2.2605	5302500	12	4	-0.110231	NaN	NaN	3	3	6	1	0.307692	1.30769	HC	not assigned.unknown	unknown protein | chr4:11792924-11794726 REVERSE	#N/A	35	35	nucleus	N	X	n.a	n.a	n.a	0	0	0	0
AT4G23640.1	AT4G23640	2	2	2	3	3	3	86.842	0	4.5464	89874000	26	6	-0.738031	NaN	NaN	3	3	6	1	0.307692	1.30769	HC	transport.potassium	Symbols: TRH1, ATKT3, KUP4 | TRH1 (TINY ROOT HAIR 1); potassium ion transmembrane transporter | chr4:12320152-12324486 REVERSE	PF02705	34	34.15	vacuole	V	X	n.a	n.a	n.a	0	0	0	0
AT4G25500.4;AT4G25500.1;AT4G25500.6;AT4G25500.3;AT4G25500.8;AT4G25500.7;AT4G25500.5;AT4G25500.2	AT4G25500	8	1	1	22	4	4	40.319	0.00020194	3.7871	15428000	17	4	-0.10186	NaN	NaN	3	3	6	1	0.307692	1.30769	HC	RNA.processing.splicing	Symbols: ATRSP35, ATRSP40, AT-SRP40, RSP35 | ATRSP35; RNA binding / nucleic acid binding / nucleotide binding | chr4:13024571-13027440 FORWARD	PF00076,PF00076	27	27.1	nucleus	N	X	n.a	n.a	n.a	0	0	0	0
AT4G25630.1	AT4G25630	19	2	2	49.4	6.6	6.6	33.653	0	4.2083	50983000	18	4	-0.665261	NaN	NaN	3	3	6	1	0.307692	1.30769	HC	protein.synthesis.ribosome biogenesis.Pre-rRNA processing and modifications.methylotransferases	Symbols: FIB2, ATFIB2 | FIB2 (FIBRILLARIN 2); snoRNA binding | chr4:13074133-13076429 FORWARD	PF01269	29	29.2	nucleus	N	Likely PD protein	n.a	n.a	n.a	0	0	0	0
AT4G25730.1	AT4G25730	3	3	3	4.1	4.1	4.1	92.266	0	15.432	88962000	31	10	-0.75658	NaN	NaN	3	3	6	1	0.307692	1.30769	HC	protein.synthesis.ribosome biogenesis.Pre-rRNA processing and modifications.methylotransferases	FtsJ-like methyltransferase family protein | chr4:13102679-13106780 REVERSE	PF01728,PF07780,PF11861	29	29.2	nucleus	N	X	n.a	n.a	n.a	0	0	0	0
AT4G25890.1	AT4G25890	3	2	2	37	21.8	21.8	11.849	0	21.142	65689000	4	7	0.622738	NaN	NaN	3	3	6	1	0.307692	1.30769	HC	protein.synthesis.ribosomal protein.eukaryotic.60S subunit.P3	60S acidic ribosomal protein P3 (RPP3A) | chr4:13159484-13160495 REVERSE	PF00428	29	29.2.1.2	cytosol	C	X	n.a	n.a	n.a	0	0	0	0
AT4G27430.2;AT4G27430.1	AT4G27430	2	2	2	2.1	2.1	2.1	118.42	0.00020559	4.0501	37196000	50	6	-0.656322	NaN	NaN	3	3	6	1	0.307692	1.30769	HC	cell.organisation	Symbols: CIP7 | CIP7 (COP1-INTERACTING PROTEIN 7); transcription activator | chr4:13718679-13723047 FORWARD	#N/A	31	31.1	nucleus	N	X	n.a	n.a	n.a	0	0	0	0
AT4G28990.1;AT4G28990.2	AT4G28990	1	1	1	3.7	3.7	3.7	39.782	0	5.2292	86987000	18	11	-0.202541	NaN	NaN	3	3	6	1	0.307692	1.30769	HC	RNA.RNA binding	RNA-binding protein-related | chr4:14291151-14293174 FORWARD	#N/A	27	27.4	nucleus	N	X	n.a	n.a	n.a	0	0	0	0
AT4G29730.1	AT4G29730	3	1	1	7.6	3.7	3.7	53.994	0	11.697	107260000	27	5	-0.637335	NaN	NaN	3	3	6	1	0.307692	1.30769	HC	not assigned.no ontology	Symbols: NFC5, MSI5 | NFC5 (Nucleosome/chromatin assembly factor group C 5) | chr4:14558985-14562538 REVERSE	PF00400,PF00400,PF00400,PF00400,PF12265	35	35	nucleus	N	X	n.a	n.a	n.a	0	0	0	0
AT4G31160.1	AT4G31160	2	2	2	1.4	1.4	1.4	205.45	0	50.566	69180000	92	3	-1.27659	NaN	NaN	3	3	6	1	0.307692	1.30769	HC	not assigned.unknown	Symbols: DCAF1 | DCAF1 (DDB1-CUL4 ASSOCIATED FACTOR 1); nucleotide binding | chr4:15145853-15153075 FORWARD	PF08513	35	35	nucleus	N	X	n.a	n.a	n.a	0	0	0	0
AT4G32070.2;AT4G32070.1	AT4G32070	3	3	3	5.5	5.5	5.5	87.974	0	8.7566	125480000	34	9	-0.736175	NaN	NaN	3	3	6	1	0.307692	1.30769	HC	not assigned.no ontology.tetratricopeptide repeat (TPR)	octicosapeptide/Phox/Bem1p (PB1) domain-containing protein / tetratricopeptide repeat (TPR)-containing protein | chr4:15504662-15507176 REVERSE	PF00564	35	35	golgi	G	X	n.a	n.a	n.a	0	0	0	0
AT4G33740.5;AT4G33740.4;AT4G33740.3;AT4G33740.2;AT4G33740.1	AT4G33740	2	2	2	6.8	6.8	6.8	52.86	0	11.718	22187000	23	1	-0.911269	NaN	NaN	3	3	6	1	0.307692	1.30769	HC	not assigned.unknown	unknown protein | chr4:16186887-16189007 FORWARD	#N/A	35	35	golgi,nucleus	G,N	X	n.a	n.a	n.a	0	0	0	0
AT4G34540.1	AT4G34540	1	1	1	8.5	8.5	8.5	34.071	0.0058097	2.1788	1676500000	18	8	0.963202	NaN	NaN	3	3	6	1	0.307692	1.30769	HC	secondary metabolism.flavonoids.isoflavones.isoflavone reductase	isoflavone reductase family protein | chr4:16498391-16502174 FORWARD	PF05368	16	16.8	cytosol	C	X	n.a	n.a	n.a	0	0	0	0
AT4G35785.1;AT4G35785.6;AT4G35785.3;AT4G35785.5;AT4G35785.2;AT4G35785.4	AT4G35785	6	6	6	28.3	28.3	28.3	21.741	0	41.951	428160000	9	24	0.505253	NaN	NaN	3	3	6	1	0.307692	1.30769	HC	RNA.RNA binding	nucleic acid binding / nucleotide binding | chr4:16952963-16955266 REVERSE	PF00076	27	27.4	nucleus	N	Likely PD protein	n.a	n.a	n.a	0	0	0	0
AT4G35920.5;AT4G35920.4;AT4G35920.3;AT4G35920.2;AT4G35920.1	AT4G35920	4	4	4	12.8	12.8	12.8	48.036	0	10.486	142010000	26	8	-0.567324	NaN	NaN	3	3	6	1	0.307692	1.30769	HC	not assigned.unknown	Symbols: MCA1 | MCA1 (mid1-complementing activity 1) | chr4:17011788-17015256 REVERSE	PF04749	35	35	nucleus	N	X	n.a	n.a	n.a	0	0	0	0
AT4G37090.2;AT4G37090.1	AT4G37090	4	4	4	24.5	24.5	24.5	21.308	0	8.1278	126390000	10	14	0.0236447	NaN	NaN	3	3	6	1	0.307692	1.30769	HC	not assigned.unknown	unknown protein | chr4:17477232-17478729 FORWARD	#N/A	35	35	nucleus	N	X	n.a	n.a	n.a	0	0	0	0
AT4G37280.1	AT4G37280	3	3	3	13.4	13.4	13.4	36.383	0	4.4012	34729000	17	5	-0.484546	NaN	NaN	3	3	6	1	0.307692	1.30769	HC	RNA.regulation of transcription.Histone acetyltransferases	MRG family protein | chr4:17546584-17549424 REVERSE	PF05712,PF11717	27	27.3	nucleus	N	X	n.a	n.a	n.a	0	0	0	0
AT4G37820.2;AT4G37820.1	AT4G37820	1	1	1	2.8	2.8	2.8	59.134	0	43.548	42254000	29	3	-0.654296	NaN	NaN	3	3	6	1	0.307692	1.30769	HC	not assigned.no ontology	unknown protein | chr4:17785255-17787471 FORWARD	#N/A	35	35	golgi	G	X	n.a	n.a	n.a	0	0	0	0
AT4G40000.1;AT4G40000.2	AT4G40000	2	2	2	4.2	4.2	4.2	88.182	0.0026134	2.5218	79672000	40	4	-0.729098	NaN	NaN	3	3	6	1	0.307692	1.30769	HC	not assigned.no ontology	NOL1/NOP2/sun family protein | chr4:18543893-18547523 REVERSE	PF01189	35	35	nucleus	N	X	n.a	n.a	n.a	0	0	0	0
AT5G01400.2;AT5G01400.3;AT5G01400.1	AT5G01400	4	4	4	6.6	6.6	6.6	140.78	0	24.834	33120000	56	6	-1.51731	NaN	NaN	3	3	6	1	0.307692	1.30769	HC	RNA.processing.3' end processing.Symplekin	Symbols: ESP4 | ESP4 (ENHANCED SILENCING PHENOTYPE 4); binding | chr5:162550-171072 REVERSE	PF11935,PF12295	27	27.1	nucleus	N	X	n.a	n.a	n.a	0	0	0	0
AT5G02850.1	AT5G02850	1	1	1	3.1	3.1	3.1	46.155	0.0035237	2.4159	25829000	22	1	-0.828456	NaN	NaN	3	3	6	1	0.307692	1.30769	HC	not assigned.no ontology.hydroxyproline rich proteins	hydroxyproline-rich glycoprotein family protein | chr5:652110-653673 FORWARD	PF10018	35	35	nucleus	N	X	n.a	n.a	n.a	0	0	0	0
AT5G05210.2;AT5G05210.1	AT5G05210	2	2	2	4.8	4.8	4.8	44.251	0.0001965	3.2943	118280000	16	7	-0.383029	NaN	NaN	3	3	6	1	0.307692	1.30769	HC	not assigned.no ontology	nucleolar matrix protein-related | chr5:1547423-1549791 FORWARD	PF04935,PF15459	35	35	nucleus	N	X	n.a	n.a	n.a	0	0	0	0
AT5G07980.2;AT5G07980.1;AT5G07940.5;AT5G07940.4;AT5G07940.3;AT5G07940.2;AT5G07940.1	AT5G07980	2	2	2	1	1	1	164.36	0.0058235	2.1917	1200700000	72	6	0.269012	NaN	NaN	3	3	6	1	0.307692	1.30769	HC	not assigned.no ontology	dentin sialophosphoprotein-related | chr5:2549166-2554669 REVERSE	#N/A	35	35	nucleus	N	X	n.a	n.a	n.a	0	0	0	0
AT5G08560.3;AT5G08560.2;AT5G08560.1	AT5G08560	1	1	1	2	2	2	65.829	0.00019932	3.5537	31168000	33	1	-1.29608	NaN	NaN	3	3	6	1	0.307692	1.30769	HC	development.unspecified	transducin family protein / WD-40 repeat family protein | chr5:2770874-2774672 REVERSE	PF00400,PF00400,PF00400,PF00400,PF00400	33	33.99	nucleus	N	X	n.a	n.a	n.a	0	0	0	0
AT5G10950.1	AT5G10950	4	4	4	10.6	10.6	10.6	43.62	0	12.833	421990000	16	18	-0.403815	NaN	NaN	3	3	6	1	0.307692	1.30769	HC	not assigned.no ontology	cylicin-related | chr5:3459273-3461734 REVERSE	#N/A	35	35	nucleus	N	X	n.a	n.a	n.a	0	0	0	0
AT5G14050.1	AT5G14050	3	3	3	6.4	6.4	6.4	60.988	0	6.0913	16701000	29	5	-0.3535	NaN	NaN	3	3	6	1	0.307692	1.30769	HC	protein.synthesis.ribosome biogenesis.Pre-rRNA processing and modifications.WD-repeat proteins	transducin family protein / WD-40 repeat family protein | chr5:4533261-4535301 FORWARD	PF00400	29	29.2	nucleus	N	X	n.a	n.a	n.a	0	0	0	0
AT5G15020.2;AT5G15020.1	AT5G15020	5	5	4	4.5	4.5	3.8	153.82	0	9.5511	87200000	76	13	-1.57158	NaN	NaN	3	3	6	1	0.307692	1.30769	HC	RNA.regulation of transcription.putative transcription regulator	Symbols: SNL2 | SNL2 (SIN3-LIKE 2) | chr5:4859127-4866031 REVERSE	PF02671,PF02671,PF02671,PF08295,PF16879	27	27.3	nucleus	N	X	n.a	n.a	n.a	0	0	0	0
AT5G15550.1;AT5G15550.3;AT5G15550.2	AT5G15550	2	2	2	7.6	7.6	7.6	47.337	0	9.7105	35960000	20	2	-0.908332	NaN	NaN	3	3	6	1	0.307692	1.30769	HC	not assigned.no ontology	transducin family protein / WD-40 repeat family protein | chr5:5058749-5062087 REVERSE	PF00400,PF00400,PF00400,PF00400,PF08154	35	35	nucleus	N	X	n.a	n.a	n.a	0	0	0	0
AT5G15750.1	AT5G15750	2	2	2	13.2	13.2	13.2	21.767	0.00019616	3.2538	16143000	12	4	-0.355286	NaN	NaN	3	3	6	1	0.307692	1.30769	HC	protein.synthesis.ribosomal protein.unknown.small subunit.S4	RNA-binding S4 domain-containing protein | chr5:5141103-5142866 FORWARD	PF00163,PF01479	29	29.2.1.9	nucleus	N	X	n.a	n.a	n.a	0	0	0	0
AT5G15800.1;AT5G15800.2;AT3G02310.2;AT3G02310.1	AT5G15800	4	4	4	14.3	14.3	14.3	28.656	0	7.4533	12715000	10	8	-0.27758	NaN	NaN	3	3	6	1	0.307692	1.30769	HC	RNA.regulation of transcription.MADS box transcription factor family	Symbols: SEP1, AGL2 | SEP1 (SEPALLATA1); DNA binding / transcription factor | chr5:5151334-5154154 REVERSE	PF00319,PF01486	27	27.3	nucleus	N	X	n.a	n.a	n.a	0	0	0	0
AT5G16310.1	AT5G16310	3	3	3	15.3	15.3	15.3	38.539	0	10.524	27266000	18	9	-0.772151	NaN	NaN	3	3	6	1	0.307692	1.30769	HC	protein.degradation.ubiquitin	Symbols: UCH1 | UCH1; ubiquitin thiolesterase | chr5:5342391-5344285 REVERSE	PF18031,PF01088	29	29.5.11	nucleus	N	X	n.a	n.a	n.a	0	0	0	0
AT5G16680.2;AT5G16680.1	AT5G16680	2	2	2	1.4	1.4	1.4	142.24	0.0044021	2.2814	631910000	67	4	-0.146524	NaN	NaN	3	3	6	1	0.307692	1.30769	HC	RNA.regulation of transcription.unclassified	PHD finger family protein | chr5:5467534-5473506 REVERSE	#N/A	27	27.3	nucleus	N	X	n.a	n.a	n.a	0	0	0	0
AT5G16780.3;AT5G16780.2;AT5G16780.1	AT5G16780	3	3	3	5.1	5.1	5.1	94.141	0	14.628	168650000	33	15	-1.16064	NaN	NaN	3	3	6	1	0.307692	1.30769	HC	development.unspecified	Symbols: DOT2, MDF | DOT2 (DEFECTIVELY ORGANIZED TRIBUTARIES 2) | chr5:5517490-5522258 REVERSE	PF03343	33	33.99	nucleus	N	X	n.a	n.a	n.a	0	0	0	0
AT5G17690.2;AT5G17690.1;AT5G17690.3	AT5G17690	4	4	4	14.3	14.3	14.3	47.279	0	7.3697	49605000	17	8	-0.671727	NaN	NaN	3	3	6	1	0.307692	1.30769	HC	DNA.synthesis/chromatin structure	Symbols: TFL2, LHP1 | TFL2 (TERMINAL FLOWER 2); DNA binding / methylated histone residue binding | chr5:5827171-5829682 REVERSE	PF00385	28	28.1	nucleus	N	X	n.a	n.a	n.a	0	0	0	0
AT5G18410.3;AT5G18410.2;AT5G18410.1	AT5G18410	2	2	2	2.4	2.4	2.4	118.06	0	6.0857	22929000	56	3	-1.49142	NaN	NaN	3	3	6	1	0.307692	1.30769	HC	cell.organisation	Symbols: PIR, KLK, PIR121, SRA1, PIRP | PIR121; transcription activator | chr5:6097298-6104980 REVERSE	PF05994,PF07159	31	31.1	cytosol	C	X	n.a	n.a	n.a	0	0	0	0
AT5G18480.1	AT5G18480	3	3	3	7.3	7.3	7.3	60.01	0	22.991	59208000	25	3	-0.667193	NaN	NaN	3	3	6	1	0.307692	1.30769	HC	major CHO metabolism.synthesis.starch	Symbols: PGSIP6 | PGSIP6 (PLANT GLYCOGENIN-LIKE STARCH INITIATION PROTEIN 6); transferase, transferring glycosyl groups / transferase, transferring hexosyl groups | chr5:6131203-6133906 REVERSE	PF01501	2	2.1	golgi	G	X	n.a	n.a	n.a	0	0	0	0
AT5G19980.1	AT5G19980	1	1	1	4.4	4.4	4.4	37.385	0	20.313	62548000	13	18	-0.976039	NaN	NaN	3	3	6	1	0.307692	1.30769	HC	protein.glycosylation	integral membrane family protein | chr5:6749705-6751070 REVERSE	PF03151	29	29.7	golgi	G	X	n.a	n.a	n.a	0	0	0	0
AT5G20600.1	AT5G20600	2	2	2	3.9	3.9	3.9	59.989	0	5.1129	58858000	27	8	-0.776213	NaN	NaN	3	3	6	1	0.307692	1.30769	HC	not assigned.unknown	FUNCTIONS IN: molecular_function unknown; INVOLVED IN: rRNA processing; LOCATED IN: preribosome, small subunit precursor; EXPRESSED IN: 22 plant structures; EXPRESSED DURING: 13 growth stages; CONTAINS InterPro DOMAIN/s: Nucleolar, Nop52 (InterPro:IPR010301); Has 444 Blast hits to 431 proteins in 151 species: Archae - 0; Bacteria - 10; Metazoa - 196; Fungi - 114; Plants - 27; Viruses - 0; Other E…	PF05997	35	35	nucleus	N	X	n.a	n.a	n.a	0	0	0	0
AT5G22010.2;AT5G22010.1	AT5G22010	4	4	4	6.3	6.3	6.3	100.43	0	33.477	966240000	43	21	-0.144051	NaN	NaN	3	3	6	1	0.307692	1.30769	HC	DNA.synthesis/chromatin structure	Symbols: AtRFC1 | AtRFC1 (replication factor C 1); ATP binding / DNA binding / DNA clamp loader/ nucleoside-triphosphatase/ nucleotide binding | chr5:7280389-7287364 REVERSE	PF00004,PF00533,PF08519	28	28.1	nucleus	N	X	n.a	n.a	n.a	0	0	0	0
AT5G23080.2;AT5G23080.1	AT5G23080	4	4	4	6.9	6.9	6.9	101.5	0	13.581	71664000	46	10	-0.894453	NaN	NaN	3	3	6	1	0.307692	1.30769	HC	RNA.processing	Symbols: TGH | TGH (TOUGH); RNA binding / protein binding | chr5:7742940-7748933 REVERSE	PF01805,PF07713	27	27.1	nucleus	N	X	n.a	n.a	n.a	0	0	0	0
AT5G25060.1	AT5G25060	5	5	5	7.8	7.8	7.8	108.28	0	15.199	54863000	52	11	-1.47735	NaN	NaN	3	3	6	1	0.307692	1.30769	HC	RNA.RNA binding	RNA recognition motif (RRM)-containing protein | chr5:8634074-8640217 REVERSE	PF04818,PF00076,PF08312,PF01805	27	27.4	nucleus	N	X	n.a	n.a	n.a	0	0	0	0
AT5G25780.1	AT5G25780	35	6	6	50.4	11.6	11.6	82.176	0	30.422	185050000	33	17	-0.613027	NaN	NaN	3	3	6	1	0.307692	1.30769	HC	protein.synthesis.initiation	Symbols: EIF3B-2, EIF3B, ATEIF3B-2 | EIF3B-2 (EUKARYOTIC TRANSLATION INITIATION FACTOR 3B-2); nucleic acid binding / protein binding / translation initiation factor | chr5:8973267-8976869 REVERSE	PF08662,PF00076	29	29.2	cytosol	C	X	n.a	n.a	n.a	0	0	0	0
AT5G26760.1;AT5G26760.2	AT5G26760	1	1	1	7.2	7.2	7.2	46.685	0.00058005	3.064	20544000	20	3	-1.08431	NaN	NaN	3	3	6	1	0.307692	1.30769	HC	not assigned.unknown	unknown protein | chr5:9403680-9407301 REVERSE	PF04181	35	35	nucleus	N	X	n.a	n.a	n.a	0	0	0	0
AT5G27320.1	AT5G27320	1	1	1	3.5	3.5	3.5	38.425	0.00095951	2.9059	176150000	16	6	-0.238724	NaN	NaN	3	3	6	1	0.307692	1.30769	HC	hormone metabolism.gibberelin.signal transduction	Symbols: ATGID1C, GID1C | GID1C (GA INSENSITIVE DWARF1C); hydrolase | chr5:9629087-9631210 FORWARD	PF07859	17	17.6	cytosol	C	X	n.a	n.a	n.a	0	0	0	0
AT5G35680.2;AT5G35680.1	AT5G35680	5	1	1	49	21.4	21.4	16.59	0	9.8459	11991000	7	3	0.0798346	NaN	NaN	3	3	6	1	0.307692	1.30769	HC	protein.synthesis.initiation	eukaryotic translation initiation factor 1A, putative / eIF-1A, putative / eIF-4C, putative | chr5:13857921-13859013 REVERSE	PF01176	29	29.2	cytosol	C	X	n.a	n.a	n.a	0	0	0	0
AT5G46430.2;AT5G46430.1	AT5G46430	7	2	2	40.6	21.1	21.1	15.475	0	12.501	84545000	6	4	0.412344	NaN	NaN	3	3	6	1	0.307692	1.30769	HC	protein.synthesis.ribosomal protein.eukaryotic.60S subunit.L32	60S ribosomal protein L32 (RPL32B) | chr5:18833267-18834564 FORWARD	PF01655	29	29.2.1.2	cytosol	C	X	n.a	n.a	n.a	0	0	0	0
AT5G46840.1	AT5G46840	1	1	1	3.2	3.2	3.2	56.496	0	61.494	150480000	24	12	-0.439037	NaN	NaN	3	3	6	1	0.307692	1.30769	HC	RNA.RNA binding	RNA recognition motif (RRM)-containing protein | chr5:19005601-19007770 FORWARD	PF00076,PF00076	27	27.4	nucleus	N	X	n.a	n.a	n.a	0	0	0	0
AT5G50320.1	AT5G50320	1	1	1	1.6	1.6	1.6	63.694	0.0061483	2.1339	14996000	32	1	-1.49701	NaN	NaN	3	3	6	1	0.307692	1.30769	HC	RNA.regulation of transcription.Histone acetyltransferases	Symbols: ELO3, HAG3, HAC8 | ELO3 (ELONGATA 3); histone acetyltransferase | chr5:20480626-20484850 REVERSE	PF00583,PF04055,PF16199	27	27.3	nucleus	N	X	n.a	n.a	n.a	0	0	0	0
AT5G50380.1	AT5G50380	1	1	1	2.2	2.2	2.2	76.616	0	4.73	39116000	32	2	-1.02095	NaN	NaN	3	3	6	1	0.307692	1.30769	HC	cell.vesicle transport	Symbols: ATEXO70F1 | ATEXO70F1 (exocyst subunit EXO70 family protein F1); protein binding | chr5:20516112-20518573 REVERSE	PF03081	31	31.4	cytosol	C	X	n.a	n.a	n.a	0	0	0	0
AT5G53440.2;AT5G53440.1	AT5G53440	3	3	3	3.6	3.6	3.6	132.1	0	4.5289	27019000	49	4	-1.53	NaN	NaN	3	3	6	1	0.307692	1.30769	HC	not assigned.unknown	unknown protein | chr5:21683679-21687970 REVERSE	#N/A	35	35	nucleus	N	X	n.a	n.a	n.a	0	0	0	0
AT5G54870.2;AT5G54870.1	AT5G54870	1	1	1	4.2	4.2	4.2	48.609	0	9.3939	25509000	20	2	-0.843684	NaN	NaN	3	3	6	1	0.307692	1.30769	HC	not assigned.unknown	unknown protein | chr5:22289135-22291799 FORWARD	#N/A	35	35	vacuole	V	X	n.a	n.a	n.a	0	0	0	0
AT5G55210.1	AT5G55210	1	1	1	8.9	8.9	8.9	18.527	0	6.8657	17620000	9	6	-0.105287	NaN	NaN	3	3	6	1	0.307692	1.30769	HC	not assigned.unknown	unknown protein | chr5:22396426-22397446 REVERSE	#N/A	35	35	nucleus	N	X	n.a	n.a	n.a	0	0	0	0
AT5G55960.1	AT5G55960	2	2	2	4.5	4.5	4.5	71.637	0.00019589	3.2233	17823000	25	1	-1.47124	NaN	NaN	3	3	6	1	0.307692	1.30769	HC	not assigned.unknown	unknown protein | chr5:22662576-22665087 FORWARD	#N/A	35	35	vacuole	V	X	n.a	n.a	n.a	0	0	0	0
AT5G57160.2;AT5G57160.1	AT5G57160	1	1	1	1.8	1.8	1.8	100.02	0.0076786	1.9922	27410000	45	3	-1.20803	NaN	NaN	3	3	6	1	0.307692	1.30769	HC	DNA.synthesis/chromatin structure	Symbols: ATLIG4, LIG4 | ATLIG4; DNA ligase (ATP)/ protein binding | chr5:23154965-23161746 REVERSE	PF01068,PF04675,PF04679,PF16589	28	28.1	nucleus	N	X	n.a	n.a	n.a	0	0	0	0
AT5G57280.1	AT5G57280	2	2	2	9.3	9.3	9.3	32.386	0	4.5769	97515000	11	9	-0.367252	NaN	NaN	3	3	6	1	0.307692	1.30769	HC	not assigned.unknown	methyltransferase | chr5:23204461-23206659 FORWARD	PF08241,PF12589	35	35	nucleus	N	X	n.a	n.a	n.a	0	0	0	0
AT5G58040.2;AT5G58040.1	AT5G58040	2	2	2	1.8	1.8	1.8	133.08	0	5.6651	22997000	60	2	-1.3067	NaN	NaN	3	3	6	1	0.307692	1.30769	HC	RNA.processing.3' end processing.Fip1	Symbols: ATFIP1[V] | ATFIP1[V] (Arabidopsis homolog of yeast Fip1 [V]); RNA binding / protein binding | chr5:23488748-23494000 FORWARD	PF05182	27	27.1	nucleus	N	X	n.a	n.a	n.a	0	0	0	0
AT5G58190.1;AT5G58190.2	AT5G58190	2	2	2	4.4	4.4	4.4	58.341	0	6.7224	38330000	15	2	-0.817652	NaN	NaN	3	3	6	1	0.307692	1.30769	HC	not assigned.unknown	Symbols: ECT10 | ECT10 | chr5:23546373-23549549 FORWARD	PF04146	35	35	nucleus	N	X	n.a	n.a	n.a	0	0	0	0
AT5G60030.1;AT5G60030.3;AT5G60030.2	AT5G60030	4	4	4	11	11	11	34.155	0	6.4181	106790000	11	6	-0.275851	NaN	NaN	3	3	6	1	0.307692	1.30769	HC	not assigned.unknown	unknown protein | chr5:24172082-24172975 REVERSE	#N/A	35	35	nucleus	N	X	n.a	n.a	n.a	0	0	0	0
AT5G61150.1;AT5G61150.2	AT5G61150	8	8	8	24	24	24	71.757	0	104.1	181710000	34	21	-0.791132	NaN	NaN	3	3	6	1	0.307692	1.30769	HC	RNA.regulation of transcription.putative transcription regulator	Symbols: VIP4 | VIP4 (VERNALIZATION INDEPENDENCE 4); protein binding | chr5:24603656-24607725 REVERSE	PF04004	27	27.3	nucleus	N	X	n.a	n.a	n.a	0	0	0	0
AT5G61770.2;AT5G61770.3;AT5G61770.1	AT5G61770	3	3	3	14.5	14.5	14.5	38.97	0	5.8335	237290000	19	4	-0.102532	NaN	NaN	3	3	6	1	0.307692	1.30769	HC	protein.synthesis.ribosome biogenesis.BRIX	Symbols: PPAN | PPAN (PETER PAN-LIKE PROTEIN) | chr5:24815608-24817611 FORWARD	PF04427	29	29.2	nucleus	N	X	n.a	n.a	n.a	0	0	0	0
AT5G64920.1	AT5G64920	1	1	1	3.9	3.9	3.9	36.965	0.0081953	1.9658	217650000	13	2	0.344305	NaN	NaN	3	3	6	1	0.307692	1.30769	HC	cell.organisation	Symbols: CIP8 | CIP8 (COP1-INTERACTING PROTEIN 8); protein binding / zinc ion binding | chr5:25943888-25945442 REVERSE	PF13639,PF14369	31	31.1	nucleus	N	X	n.a	n.a	n.a	0	0	0	0
AT5G65630.1	AT5G65630	2	2	2	6.1	6.1	6.1	65.076	0	6.2319	40651000	25	7	-0.690403	NaN	NaN	3	3	6	1	0.307692	1.30769	HC	RNA.regulation of transcription.Global transcription factor group	Symbols: GTE7 | GTE7 (Global transcription factor group E 7); DNA binding | chr5:26225832-26228449 REVERSE	PF00439,PF17035	27	27.3	nucleus	N	X	n.a	n.a	n.a	0	0	0	0
AT5G65900.1	AT5G65900	1	1	1	2.8	2.8	2.8	72.052	0.00020563	4.0545	7289500	36	1	-1.26047	NaN	NaN	3	3	6	1	0.307692	1.30769	HC	protein.synthesis.ribosome biogenesis.Pre-rRNA processing and modifications.DExD-box helicases	DEAD/DEAH box helicase, putative | chr5:26358206-26361443 FORWARD	PF13959,PF00270,PF00271	29	29.2	nucleus	N	X	n.a	n.a	n.a	0	0	0	0
AT5G66410.1	AT5G66410	3	3	3	13	13	13	26.368	0.00020276	3.8648	97169000	14	5	-0.324042	NaN	NaN	3	3	6	1	0.307692	1.30769	HC	redox.thioredoxin	Symbols: PLP3b | PLP3b (Phosducin-like protein 3 homolog); beta-tubulin binding | chr5:26519770-26521696 FORWARD	PF00085	21	21.1	cytosol	C	X	n.a	n.a	n.a	0	0	0	0
AT5G66540.2;AT5G66540.1	AT5G66540	2	2	2	4	4	4	59.744	0.00019972	3.5633	19393000	18	2	-0.913836	NaN	NaN	3	3	6	1	0.307692	1.30769	HC	protein.synthesis.ribosome biogenesis.Pre-rRNA processing and modifications.snoRNPs	FUNCTIONS IN: molecular_function unknown; INVOLVED IN: rRNA processing; LOCATED IN: cytosol, nucleolus, nucleus; EXPRESSED IN: 22 plant structures; EXPRESSED DURING: 12 growth stages; CONTAINS InterPro DOMAIN/s: U3 small nucleolar ribonucleoprotein complex, subunit Mpp10p (InterPro:IPR012173), Mpp10 protein (InterPro:IPR007151); Has 76240 Blast hits to 38667 proteins in 1479 species: Archae - 252…	PF04006,PF04006	29	29.2	nucleus	N	X	n.a	n.a	n.a	0	0	0	0
AT1G02335.1	AT1G02335	7	7	5	42.5	42.5	32	23.441	0	60.485	3089500000	11	75	0.225726	0.558385	0.358871	-0.332659	-0.133146	-0.465805	0.461183	0.846154	1.30734	HC	metal handling.binding, chelation and storage	Symbols: GL22 | GL22 (GERMIN-LIKE PROTEIN SUBFAMILY 2 MEMBER 2 PRECURSOR.); manganese ion binding / nutrient reservoir | chr1:463855-464924 REVERSE	PF00190	15	15.2	extracellular	EX	Likely PD protein	n.a	n.a	n.a	0	0	0	0
AT2G18790.2;AT2G18790.1	AT2G18790	11	11	11	12.8	12.8	12.8	125.04	0	33.494	199630000	66	15	-1.28522	NaN	-1.50841	3	0.223188	3.22319	0.768599	0.538462	1.30706	HC	signalling.light	Symbols: PHYB, HY3, OOP1 | PHYB (PHYTOCHROME B); G-protein coupled photoreceptor/ protein histidine kinase/ red or far-red light photoreceptor/ signal transducer | chr2:8139881-8144430 FORWARD	PF00360,PF00512,PF00989,PF00989,PF01590,PF02518,PF08446	30	30.11	nucleus	N	X	n.a	n.a	n.a	0	0	0	0
AT2G26910.1	AT2G26910	5	3	3	4.4	3.6	3.6	161.26	0	6.5395	68490000	66	3	-1.68197	NaN	-0.979352	3	-0.70262	2.29738	0.691448	0.615385	1.30683	HC	transport.ABC transporters and multidrug resistance systems	Symbols: PDR4, ATPDR4 | PDR4 (PLEIOTROPIC DRUG RESISTANCE 4); ATPase, coupled to transmembrane movement of substances | chr2:11481623-11488186 FORWARD	PF00005,PF00005,PF01061,PF01061,PF08370,PF14510,PF19055	34	34.16	plasma membrane	PM	X	n.a	n.a	n.a	0	0	0	0
AT3G20520.1	AT3G20520	6	6	6	13.7	13.7	13.7	81.359	0	27.779	464770000	32	12	-0.83494	NaN	-0.124909	3	-0.710031	2.28997	0.690831	0.615385	1.30622	HC	lipid metabolism.lipid degradation.lysophospholipases.glycerophosphodiester phosphodiesterase	Symbols: SVL3 | SVL3 (SHV3-LIKE 3); glycerophosphodiester phosphodiesterase/ phosphoric diester hydrolase | chr3:7162828-7165859 FORWARD	PF03009	11	11.9	extracellular	EX	X	n.a	n.a	n.a	0	0	0	0
AT5G18860.2;AT5G18860.1	AT5G18860	7	7	7	12.9	12.9	12.9	99.071	0	25.715	55632000	38	8	-1.45089	-0.738379	NaN	-0.712508	3	2.28749	0.690624	0.615385	1.30601	HC	nucleotide metabolism.degradation	inosine-uridine preferring nucleoside hydrolase family protein | chr5:6290676-6295811 FORWARD	PF01156,PF01156	23	23.2	extracellular	EX	X	n.a	n.a	n.a	0	0	0	0
AT1G06060.2;AT1G06060.1	AT1G06060	2	2	2	11.4	11.4	11.4	24.575	0	35.666	258990000	10	12	0.0696573	NaN	-0.139423	3	0.209081	3.20908	0.767423	0.538462	1.30588	HC	signalling.G-proteins	RanBPM-related | chr1:1832943-1834861 FORWARD	PF10607	30	30.5	golgi	G	X	n.a	n.a	n.a	0	0	0	0
AT5G45280.2;AT5G45280.1	AT5G45280	14	11	11	50.6	43.5	43.5	42.009	0	87.216	1287900000	22	42	-0.378916	-0.355338	0.0852326	-0.0235779	-0.464149	-0.487727	0.459356	0.846154	1.30551	HC	cell wall.pectin*esterases.acetyl esterase	pectinacetylesterase, putative | chr5:18345595-18349695 FORWARD	PF03283	10	10.8	extracellular	EX	X	n.a	n.a	n.a	0	0	0	0
AT5G49720.1	AT5G49720	3	3	3	6.1	6.1	6.1	69.191	0	10.445	171880000	25	5	-0.752395	NaN	-0.955748	3	0.203353	3.20335	0.766946	0.538462	1.30541	HC	cell wall.cellulose synthesis	Symbols: ATGH9A1, DEC, KOR, RSW2, IRX2, KOR1 | ATGH9A1 (ARABIDOPSIS THALIANA GLYCOSYL HYDROLASE 9A1); cellulase/ hydrolase, hydrolyzing O-glycosyl compounds | chr5:20197391-20200288 REVERSE	PF00759	10	10.2	cytosol,golgi,plasma membrane	C,G,PM	X	n.a	n.a	n.a	0	0	0	0
AT1G78060.1	AT1G78060	34	34	34	56.6	56.6	56.6	83.891	0	323.31	6272400000	42	153	-0.309652	-0.631598	0.506257	0.321945	-0.81591	-0.493964	0.458836	0.846154	1.30499	HC	cell wall.degradation.mannan-xylose-arabinose-fucose	glycosyl hydrolase family 3 protein | chr1:29349679-29352924 REVERSE	PF00933,PF01915,PF14310	10	10.6	extracellular	EX	X	n.a	n.a	n.a	0	0	0	0
AT5G64090.1	AT5G64090	2	2	2	11.6	11.6	11.6	47.725	0	15	210890000	23	3	-0.883048	NaN	-0.153847	3	-0.729201	2.2708	0.689233	0.615385	1.30462	HC	not assigned.unknown	FUNCTIONS IN: molecular_function unknown; INVOLVED IN: biological_process unknown; LOCATED IN: plasma membrane; EXPRESSED IN: 23 plant structures; EXPRESSED DURING: 13 growth stages; CONTAINS InterPro DOMAIN/s: Hyccin (InterPro:IPR018619); BEST Arabidopsis thaliana protein match is: unknown protein (TAIR:AT5G21050.1); Has 266 Blast hits to 191 proteins in 57 species: Archae - 0; Bacteria - 0; Met…	PF09790	35	35	plasma membrane	PM	X	n.a	n.a	n.a	0	0	0	0
AT2G22125.1	AT2G22125	21	21	21	16	16	16	230.7	0	188.75	2210100000	110	61	-1.50903	NaN	-0.778006	3	-0.731028	2.26897	0.689081	0.615385	1.30447	HC	not assigned.no ontology.C2 domain-containing protein	binding | chr2:9406263-9414518 FORWARD	PF00168,PF00514,PF00514	35	35	plasma membrane	PM	X	n.a	n.a	n.a	0	0	0	0
AT3G46060.3;AT3G46060.2;AT3G46060.1	AT3G46060	10	9	1	44.9	39.8	6.5	23.835	0	45.227	1205200000	16	49	-0.386357	-0.426773	0.163163	0.0404157	-0.54952	-0.509104	0.457575	0.846154	1.30373	HC	signalling.G-proteins	Symbols: ARA3, ARA-3, ATRABE1C, ATRAB8A | ATRAB8A; GTP binding | chr3:16917589-16920018 FORWARD	PF00071	30	30.5	plasma membrane,cytosol	PM,C	X	n.a	n.a	n.a	0	0	0	0
AT3G46830.2;AT3G46830.1	AT3G46830	6	4	2	25.3	17.1	12.9	23.849	0	12.76	472030000	14	21	-0.490635	NaN	-0.673443	3	0.182809	3.18281	0.765234	0.538462	1.3037	HC	signalling.G-proteins	Symbols: ATRAB11A, ATRABA2C, ATRAB-A2C, RAB-A2C | ATRABA2C (ARABIDOPSIS RAB GTPASE HOMOLOG A2C); GTP binding | chr3:17246344-17248713 REVERSE	PF00071	30	30.5	golgi	G	X	n.a	n.a	n.a	0	0	0	0
AT2G38380.1	AT2G38380	10	9	6	40.7	37.8	30.7	38.108	0	127.47	7995700000	15	47	0.550701	0.37857	1.23813	0.17213	-0.68743	-0.5153	0.457058	0.846154	1.30321	HC	misc.peroxidases	peroxidase 22 (PER22) (P22) (PRXEA) / basic peroxidase E | chr2:16076384-16078583 FORWARD	PF00141	26	26.12	extracellular	EX	X	n.a	n.a	n.a	0	0	0	0
AT2G35780.1	AT2G35780	8	8	8	22.1	22.1	22.1	51.521	0	61.218	765190000	20	21	-0.619787	NaN	0.135382	3	-0.755168	2.24483	0.687069	0.615385	1.30245	HC	protein.degradation.serine protease	Symbols: scpl26 | scpl26 (serine carboxypeptidase-like 26); serine-type carboxypeptidase | chr2:15037662-15040127 REVERSE	PF00450	29	29.5.5	extracellular	EX	X	n.a	n.a	n.a	0	0	0	0
AT4G08520.1;AT1G60970.1	AT4G08520	4	4	4	26.5	26.5	26.5	19.876	0	92.147	904920000	5	19	-0.0294936	NaN	0.727609	3	-0.757103	2.2429	0.686908	0.615385	1.30229	HC	cell.vesicle transport	clathrin adaptor complex small chain family protein | chr4:5417348-5420530 FORWARD	PF01217	31	31.4	endoplasmic reticulum	ER	X	n.a	n.a	n.a	0	0	0	0
AT5G48580.1	AT5G48580	5	5	4	36.8	36.8	28.8	17.658	0	14.238	983440000	9	22	-0.118809	NaN	0.644333	3	-0.763142	2.23686	0.686405	0.615385	1.30179	HC	cell.cycle.peptidylprolyl isomerase	Symbols: FKBP15-2 | FKBP15-2; FK506 binding / peptidyl-prolyl cis-trans isomerase | chr5:19695929-19698712 REVERSE	PF00254	31	31.3	endoplasmic reticulum	ER	X	n.a	n.a	n.a	0	0	0	0
AT1G62480.1	AT1G62480	14	14	14	97.4	97.4	97.4	16.628	0	323.31	16398000000	10	141	0.97991	NaN	0.820344	3	0.159566	3.15957	0.763297	0.538462	1.30176	HC	signalling.calcium	vacuolar calcium-binding protein-related | chr1:23128705-23129759 FORWARD	#N/A	30	30.3	cytosol	C	X	n.a	n.a	n.a	0	0	0	0
AT2G34260.2;AT2G34260.1	AT2G34260	2	2	2	12.2	12.2	12.2	32.086	0.0044142	2.3118	911110000	9	3	-0.0563602	NaN	0.708651	3	-0.765012	2.23499	0.686249	0.615385	1.30163	HC	not assigned.no ontology	transducin family protein / WD-40 repeat family protein | chr2:14465849-14468531 FORWARD	PF00400,PF00400,PF12894	35	35	nucleus,extracellular	N,EX	X	n.a	n.a	n.a	0	0	0	0
AT2G44540.1	AT2G44540	4	4	2	9.2	9.2	4.7	53.421	0	10.267	159130000	25	6	-0.935606	-1.00586	-0.329215	0.0702539	-0.606391	-0.536137	0.455322	0.846154	1.30148	HC	misc.gluco-, galacto- and mannosidases.endoglucanase	Symbols: AtGH9B9 | AtGH9B9 (Arabidopsis thaliana glycosyl hydrolase 9B9); catalytic/ hydrolase, hydrolyzing O-glycosyl compounds | chr2:18386219-18388110 REVERSE	PF00759	26	26.3	extracellular	EX	X	n.a	n.a	n.a	0	0	0	0
AT2G43790.1	AT2G43790	7	7	7	24.6	24.6	24.6	45.057	0	69.461	1532600000	19	28	0.0301166	NaN	-0.122059	3	0.152176	3.15218	0.762681	0.538462	1.30114	HC	signalling.MAP kinases.MAPK	Symbols: ATMPK6, MPK6, MAPK6 | ATMPK6 (ARABIDOPSIS THALIANA MAP KINASE 6); MAP kinase/ kinase | chr2:18138307-18140988 FORWARD	PF00069	30	30.6.4	cytosol	C	X	n.a	n.a	n.a	0	0	0	0
AT1G52380.4;AT1G52380.3;AT1G52380.2;AT1G52380.1	AT1G52380	4	4	4	12.7	12.7	12.7	46.592	0	20.352	155350000	19	7	-0.852204	NaN	-1.00396	3	0.151757	3.15176	0.762646	0.538462	1.30111	HC	signalling.G-proteins	Ran-binding protein 1 domain-containing protein / RanBP1 domain-containing protein | chr1:19508983-19511539 FORWARD	PF08911,PF00638	30	30.5	nucleus	N	X	n.a	NUP50a	basket	0	0	1	1
AT1G41830.1	AT1G41830	23	22	19	54.8	51.8	45.9	60.577	0	231.78	15975000000	25	227	0.82598	1.12242	1.07372	-0.296436	-0.247745	-0.54418	0.454652	0.846154	1.30081	HC	cell wall.pectin*esterases.PME	Symbols: SKS6 | SKS6 (SKU5-SIMILAR 6); pectinesterase | chr1:15603617-15607966 REVERSE	PF07732,PF00394,PF07731	10	10.8	extracellular	EX	X	n.a	n.a	n.a	0	0	0	0
AT2G26570.2;AT2G26570.1	AT2G26570	8	8	7	11.2	11.2	10.3	89.293	0	17.989	1284900000	49	22	-0.893757	NaN	-0.114524	3	-0.779233	2.22077	0.685064	0.615385	1.30045	HC	not assigned.unknown	unknown protein | chr2:11299144-11302191 FORWARD	PF05701	35	35	plasma membrane	PM	X	n.a	n.a	n.a	0	0	0	0
AT3G61050.2;AT3G61050.1	AT3G61050	18	18	18	44.7	44.7	44.7	55.094	0	188.02	3707300000	25	88	-0.337913	-0.55995	0.440779	0.222037	-0.778691	-0.556654	0.453612	0.846154	1.29977	HC	signalling.calcium	Symbols: NTMC2TYPE4, NTMC2T4 | NTMC2T4; lipid binding | chr3:22597227-22601412 FORWARD	PF17047,PF00168	30	30.3	plasma membrane,endoplasmic reticulum	PM,ER	X	n.a	n.a	n.a	0	0	0	0
AT4G32760.2;AT4G32760.1;AT4G32760.3	AT4G32760	3	3	3	6.8	6.8	6.8	73.092	0	16.611	247740000	16	17	-1.14589	NaN	-0.353658	3	-0.792236	2.20776	0.68398	0.615385	1.29936	HC	cell.vesicle transport	protein transporter | chr4:15799138-15804175 FORWARD	PF00790,PF03127	31	31.4	plasma membrane,nucleus	PM,N	Likely PD protein	n.a	n.a	n.a	0	0	0	0
AT4G30270.1	AT4G30270	11	11	10	47.6	47.6	41.6	30.755	0	97.66	5946300000	12	102	0.378542	0.0373889	1.28976	0.341153	-0.911223	-0.57007	0.452494	0.846154	1.29865	HC	cell wall.degradation.mannan-xylose-arabinose-fucose	Symbols: MERI5B, MERI-5, SEN4 | MERI5B (meristem-5); hydrolase, acting on glycosyl bonds / xyloglucan:xyloglucosyl transferase | chr4:14819192-14820592 REVERSE	PF00722,PF06955	10	10.6	extracellular	EX	X	n.a	n.a	n.a	0	0	0	0
AT4G22485.1	AT4G22485	4	4	4	6.7	6.7	6.7	68.199	0	125.47	1430600000	8	17	0.420983	0.570385	0.872087	-0.149402	-0.451104	-0.600506	0.449958	0.846154	1.29611	HC	misc.protease inhibitor/seed storage/lipid transfer protein (LTP) family protein	Encodes a Protease inhibitor/seed storage/LTP family protein | chr4:11844506-11846476 REVERSE	PF14547	26	26.21	extracellular	EX	X	n.a	n.a	n.a	0	0	0	0
AT1G13900.1	AT1G13900	11	11	11	21	21	21	73.716	0	53.128	1461700000	32	24	-0.966274	-1.26912	-0.0542524	0.302848	-0.912022	-0.609174	0.449235	0.846154	1.29539	HC	misc.acid and other phosphatases	calcineurin-like phosphoesterase family protein | chr1:4753145-4755580 REVERSE	PF00149,PF14008,PF16656	26	26.13	extracellular	EX	Likely PD protein	n.a	n.a	n.a	0	0	0	0
AT3G05190.3;AT3G05190.2;AT3G05190.1;AT5G27410.3;AT5G27410.1;AT5G27410.2;AT5G27410.4	AT3G05190	4	4	4	9.7	9.7	9.7	62.212	0	5.984	89879000	32	4	-1.2507	NaN	-1.3292	3	0.0785045	3.0785	0.756542	0.538462	1.295	HC	misc.aminotransferases.aminotransferase class IV family protein	aminotransferase class IV family protein | chr3:1471397-1475784 FORWARD	PF01063	26	26.26	cytosol	C	X	n.a	n.a	n.a	0	0	0	0
AT5G66920.1	AT5G66920	6	6	6	10.4	10.4	10.4	60.82	0	12.577	389890000	22	19	-0.881488	-0.624934	-0.522121	-0.256554	-0.359367	-0.615921	0.448673	0.846154	1.29483	HC	misc.oxidases - copper, flavone etc	Symbols: sks17 | sks17 (SKU5 Similar 17); copper ion binding / oxidoreductase | chr5:26722823-26725626 FORWARD	PF07732,PF00394,PF07731	26	26.7	extracellular	EX	X	n.a	n.a	n.a	0	0	0	0
AT3G54960.1;AT3G54960.2	AT3G54960	14	14	14	27.3	27.3	27.3	64.211	0	106.67	1108100000	34	25	-0.942406	NaN	-0.0915553	3	-0.85085	2.14915	0.679096	0.615385	1.29448	HC	redox.thioredoxin.PDIL	Symbols: ATPDIL1-3, PDI1, ATPDI1 | ATPDIL1-3 (PDI-LIKE 1-3); protein disulfide isomerase | chr3:20363310-20366840 REVERSE	PF00085,PF00085,PF13848	21	21.1	endoplasmic reticulum	ER	X	n.a	n.a	n.a	0	0	0	0
AT1G48050.3;AT1G48050.2;AT1G48050.1	AT1G48050	3	3	3	8.2	8.2	8.2	71.705	0	5.8938	24825000	40	4	-0.903273	-0.973851	NaN	0.0705784	3	3.07058	0.755882	0.538462	1.29434	HC	signalling.misc	Symbols: KU80, ATKU80 | KU80; double-stranded DNA binding / protein binding | chr1:17723452-17727043 FORWARD	PF03731,PF08785,PF03730,PF02735	30	30.8	nucleus	N	X	n.a	n.a	n.a	0	0	0	0
AT4G35100.2;AT4G35100.1	AT4G35100	8	8	7	47.9	47.9	43.6	29.742	0	233.21	16448000000	8	186	2.20348	0.880947	1.37984	1.32254	0.823648	2.14619	0.678849	0.615385	1.29423	HC	transport.Major Intrinsic Proteins.PIP	Symbols: PIP3, PIP3A, PIP2;7, SIMIP | PIP3 (PLASMA MEMBRANE INTRINSIC PROTEIN 3); water channel | chr4:16708598-16710248 FORWARD	PF00230	34	34.19.1	plasma membrane	PM	X	n.a	n.a	n.a	0	0	0	0
AT1G18580.1	AT1G18580	1	1	1	1.7	1.7	1.7	61.878	0.0052823	2.2133	45693000	31	5	-1.252	NaN	-1.31914	3	0.0671379	3.06714	0.755595	0.538462	1.29406	HC	misc.UDP glucosyl and glucoronyl transferases	Symbols: GAUT11 | GAUT11 (Galacturonosyltransferase 11); polygalacturonate 4-alpha-galacturonosyltransferase | chr1:6395864-6398239 FORWARD	PF01501	26	26.2	golgi	G	X	n.a	n.a	n.a	0	0	0	0
AT4G23400.1	AT4G23400	9	6	6	35.2	18.5	18.5	30.646	0	74.85	2076400000	9	58	0.846522	-0.269685	-0.179487	1.11621	1.02601	2.14222	0.678518	0.615385	1.2939	HC	transport.Major Intrinsic Proteins.PIP	Symbols: PIP1D, PIP1;5 | PIP1;5 (PLASMA MEMBRANE INTRINSIC PROTEIN 1;5); water channel | chr4:12220743-12222371 FORWARD	PF00230	34	34.19.1	plasma membrane	PM	X	n.a	n.a	n.a	0	0	0	0
AT1G59610.1	AT1G59610	38	38	17	51	51	27.3	100.23	0	323.31	6419500000	56	200	-0.167098	-0.132458	0.427312	-0.0346396	-0.59441	-0.62905	0.447579	0.846154	1.29373	HC	misc.dynamin	Symbols: ADL3, CF1 | ADL3 (ARABIDOPSIS DYNAMIN-LIKE 3); GTPase | chr1:21893221-21901086 FORWARD	PF00169,PF00350,PF01031,PF02212	26	26.17	plasma membrane	PM	Likely PD protein	n.a	n.a	n.a	0	0	0	0
AT1G16410.1;AT1G16410.2	AT1G16410	24	24	24	48.7	48.7	48.7	61.695	0	113.89	29910000000	32	131	0.776321	-0.662663	0.0850818	1.43898	0.691239	2.13022	0.677519	0.615385	1.2929	HC	misc.cytochrome P450	Symbols: CYP79F1, BUS1, SPS1 | CYP79F1 (CYTOCHROME P450 79F1); oxidoreductase, acting on paired donors, with incorporation or reduction of molecular oxygen, NADH or NADPH as one donor, and incorporation of one atom of oxygen | chr1:5608807-5611426 FORWARD	PF00067	26	26.1	endoplasmic reticulum	ER	X	n.a	n.a	n.a	0	0	0	0
AT2G45140.1;AT2G45140.2	AT2G45140	12	12	12	54.8	54.8	54.8	26.442	0	162.86	2009500000	15	77	0.408526	-0.654053	-0.657577	1.06258	1.0661	2.12868	0.67739	0.615385	1.29277	HC	protein.targeting.secretory pathway.ER	Symbols: PVA12 | PVA12 (PLANT VAP HOMOLOG 12); structural molecule | chr2:18610806-18613290 FORWARD	PF00635	29	29.3.4	endoplasmic reticulum	ER	X	n.a	n.a	n.a	0	0	0	0
AT5G49360.1	AT5G49360	27	27	26	50	50	49.1	83.523	0	323.31	15583000000	43	293	0.286139	0.355526	0.859237	-0.0693869	-0.573099	-0.642486	0.44646	0.846154	1.29261	HC	cell wall.degradation.mannan-xylose-arabinose-fucose	Symbols: BXL1, ATBXL1 | BXL1 (BETA-XYLOSIDASE 1); hydrolase, hydrolyzing O-glycosyl compounds | chr5:20011879-20016742 REVERSE	PF00933,PF01915,PF14310	10	10.6	extracellular	EX	X	n.a	n.a	n.a	0	0	0	0
AT2G47130.1;AT3G29250.2;AT3G29250.3;AT3G29250.1	AT2G47130	4	4	4	23	23	23	26.9	0	12.136	205110000	13	3	-0.454966	NaN	-0.498266	3	0.0433005	3.0433	0.753608	0.538462	1.29207	HC	misc.short chain dehydrogenase/reductase (SDR)	short-chain dehydrogenase/reductase (SDR) family protein | chr2:19349536-19350539 REVERSE	PF13561	26	26.22	cytosol	C	X	n.a	n.a	n.a	0	0	0	0
AT3G49110.1	AT3G49110	14	8	7	42.1	24	21.8	38.941	0	204.45	6020400000	15	48	-0.280076	-0.320648	0.414527	0.0405713	-0.694604	-0.654032	0.445497	0.846154	1.29165	HC	misc.peroxidases	Symbols: PRX33, PRXCA, ATPRX33, ATPCA | PRXCA (PEROXIDASE CA); peroxidase | chr3:18200664-18203142 FORWARD	PF00141	26	26.12	extracellular	EX	X	n.a	n.a	n.a	0	0	0	0
AT3G51550.1	AT3G51550	5	5	4	7.2	7.2	5.8	98.149	0	19.876	374430000	45	18	-1.25166	-0.939169	-0.904974	-0.312495	-0.346691	-0.659186	0.445068	0.846154	1.29122	HC	signalling.receptor kinases.Catharanthus roseus-like RLK1	Symbols: FER | FER (FERONIA); kinase/ protein kinase | chr3:19117584-19120881 REVERSE	PF07714,PF12819	30	30.2	plasma membrane	PM	X	n.a	n.a	n.a	0	0	0	0
AT5G60020.2;AT5G60020.1;AT5G60020.3	AT5G60020	6	6	6	12.6	12.6	12.6	60.51	0	13.133	417400000	22	30	0.487617	-0.0279416	-1.10672	0.515558	1.59433	2.10989	0.675824	0.615385	1.29121	HC	secondary metabolism.simple phenols	Symbols: LAC17, ATLAC17 | LAC17 (laccase 17); laccase | chr5:24167996-24170462 FORWARD	PF00394,PF07731,PF07732	16	16.10	extracellular	EX	X	n.a	n.a	n.a	0	0	0	0
AT2G24280.1;AT2G24280.2	AT2G24280	20	20	20	43.1	43.1	43.1	56.232	0	134.97	2308400000	21	79	0.287608	-0.766849	-0.766018	1.05446	1.05363	2.10808	0.675674	0.615385	1.29106	HC	protein.degradation	serine carboxypeptidase S28 family protein | chr2:10333284-10337128 FORWARD	PF05577	29	29.5	extracellular	EX	X	n.a	n.a	n.a	0	0	0	0
AT1G28290.2;AT1G28290.1	AT1G28290	9	9	9	25.7	25.7	25.7	33.932	0	67.069	12032000000	17	118	1.03651	-0.115385	0.0807744	1.1519	0.955737	2.10763	0.675636	0.615385	1.29102	HC	stress.abiotic.unspecified	Symbols: AGP31 | AGP31 (arabinogalactan-protein 31) | chr1:9889125-9890993 REVERSE	PF01190	20	20.2	extracellular	EX	X	n.a	n.a	n.a	0	0	0	0
AT1G29660.1	AT1G29660	10	10	10	39.3	39.3	39.3	40.141	0	289.33	3192100000	13	115	0.0747847	0.456571	0.372072	-0.381786	-0.297287	-0.679073	0.443411	0.846154	1.28956	HC	misc.GDSL-motif lipase	GDSL-motif lipase/hydrolase family protein | chr1:10371839-10373766 FORWARD	PF00657	26	26.28	extracellular	EX	X	n.a	n.a	n.a	0	0	0	0
AT5G58590.1	AT5G58590	3	2	2	28.8	19.6	19.6	24.722	0	48.702	460040000	9	11	-0.00997745	NaN	-0.0221336	3	0.0121562	3.01216	0.751013	0.538462	1.28947	HC	signalling.G-proteins	Symbols: RANBP1 | RANBP1 (RAN BINDING PROTEIN 1); protein binding | chr5:23680079-23681798 REVERSE	PF00638	30	30.5	cytosol	C	X	n.a	n.a	n.a	0	0	0	0
AT4G20830.2;AT4G20830.1	AT4G20830	27	27	24	44.3	44.3	41.3	60.286	0	94.627	4923500000	38	146	-0.274796	-0.495696	0.63682	0.2209	-0.911616	-0.690716	0.44244	0.846154	1.28859	HC	misc.nitrilases, *nitrile lyases, berberine bridge enzymes, reticuline oxidases, troponine reductases	FAD-binding domain-containing protein | chr4:11155453-11157806 FORWARD	PF01565,PF08031	26	26.8	plasma membrane,endoplasmic reticulum	PM,ER	X	n.a	n.a	n.a	0	0	0	0
AT2G37130.2;AT2G37130.1	AT2G37130	13	13	13	44.6	44.6	44.6	33.272	0	113.27	3206300000	15	65	0.115942	0.75655	0.189882	-0.640609	-0.0739402	-0.714549	0.440454	0.846154	1.28661	HC	misc.peroxidases	peroxidase 21 (PER21) (P21) (PRXR5) | chr2:15597921-15600077 REVERSE	PF00141	26	26.12	extracellular,cytosol	EX,C	Likely PD protein	n.a	n.a	n.a	0	0	0	0
AT2G41560.4;AT2G41560.3;AT2G41560.2;AT2G41560.1	AT2G41560	3	2	2	5	3.8	3.8	100.8	0	20.204	68373000	36	11	-1.40546	NaN	-1.38308	3	-0.0223794	2.97762	0.748135	0.538462	1.2866	HC	signalling.calcium	Symbols: ACA4 | ACA4 (AUTO-INHIBITED CA(2+)-ATPASE, ISOFORM 4); calcium-transporting ATPase/ calmodulin binding | chr2:17332084-17337269 REVERSE	PF00122,PF00689,PF00690,PF00702,PF12515	30	30.3	vacuole	V	X	n.a	n.a	n.a	0	0	0	0
AT4G08770.1	AT4G08770	9	5	5	33.5	24.3	24.3	38.202	0	116.53	929040000	20	28	-0.506585	0.216657	-0.504423	-0.723242	-0.00216204	-0.725404	0.43955	0.846154	1.2857	HC	misc.peroxidases	peroxidase, putative | chr4:5598115-5600312 REVERSE	PF00141	26	26.12	extracellular	EX	X	n.a	n.a	n.a	0	0	0	0
AT4G20860.1	AT4G20860	6	6	6	13.4	13.4	13.4	60.409	0	13.604	185120000	35	13	-1.18949	-0.343291	-1.30264	-0.846196	0.113148	-0.733048	0.438913	0.846154	1.28507	HC	misc.nitrilases, *nitrile lyases, berberine bridge enzymes, reticuline oxidases, troponine reductases	FAD-binding domain-containing protein | chr4:11172622-11174467 FORWARD	PF08031,PF01565	26	26.8	extracellular	EX	X	n.a	n.a	n.a	0	0	0	0
AT1G53210.1	AT1G53210	10	10	10	21.7	21.7	21.7	63.416	0	156.24	2469000000	18	72	-0.0679821	0.206923	0.398211	-0.274905	-0.466193	-0.741098	0.438242	0.846154	1.2844	HC	signalling.calcium	sodium/calcium exchanger family protein / calcium-binding EF hand family protein | chr1:19844632-19847836 FORWARD	PF01699,PF01699,PF13499	30	30.3	plasma membrane	PM	X	n.a	n.a	n.a	0	0	0	0
AT2G22170.1	AT2G22170	5	4	4	38.3	32.8	32.8	20.129	0	274.09	2799100000	6	29	0.259919	NaN	1.23564	3	-0.975721	2.02428	0.66869	0.615385	1.28407	HC	not assigned.no ontology	lipid-associated family protein | chr2:9426849-9427817 REVERSE	PF01477	35	35	extracellular	EX	X	n.a	n.a	n.a	0	0	0	0
AT1G64710.1;AT1G64710.2;AT1G64710.3	AT1G64710	6	6	6	24.2	24.2	24.2	41.315	0	89.638	659760000	11	12	-0.352117	NaN	-0.291334	3	-0.0607832	2.93922	0.744935	0.538462	1.2834	HC	misc.alcohol dehydrogenases	alcohol dehydrogenase, putative | chr1:24044545-24046552 FORWARD	PF08240,PF00107	26	26.11	golgi,cytosol	G,C	X	n.a	n.a	n.a	0	0	0	0
AT3G16110.1	AT3G16110	5	5	5	10.7	10.7	10.7	59.57	0	10.016	786850000	31	11	-1.37397	NaN	-0.38888	3	-0.985091	2.01491	0.667909	0.615385	1.28329	HC	redox.thioredoxin.PDIL	Symbols: ATPDIL1-6, ATPDI4, PDI4 | ATPDIL1-6 (PDI-LIKE 1-6); protein disulfide isomerase | chr3:5460793-5463760 REVERSE	PF00085,PF00085,PF13848	21	21.1	endoplasmic reticulum	ER	X	n.a	n.a	n.a	0	0	0	0
AT3G17390.1	AT3G17390	26	16	14	78.1	51.4	44.8	42.795	0	159.24	13089000000	20	128	0.00401767	-0.396227	1.16185	0.400245	-1.15784	-0.757592	0.436867	0.846154	1.28302	HC	metal handling.binding, chelation and storage	Symbols: MTO3, SAMS3, MAT4 | MTO3 (METHIONINE OVER-ACCUMULATOR 3); methionine adenosyltransferase | chr3:5952187-5954084 REVERSE	PF00438,PF02772,PF02773	15	15.2	nucleus,plasma membrane	N,PM	X	n.a	n.a	n.a	0	0	0	0
AT5G42970.1	AT5G42970	11	11	11	34.8	34.8	34.8	44.957	0	98.918	575940000	20	25	-0.456715	NaN	-0.384266	3	-0.0724494	2.92755	0.743963	0.538462	1.28242	HC	signalling.light.COP9 signalosome	Symbols: COP8, FUS4, EMB134, COP14, CSN4, FUS8, ATS4 | COP8 (CONSTITUTIVE PHOTOMORPHOGENIC 8); protein binding | chr5:17237165-17240733 REVERSE	PF01399	30	30.11	nucleus	N	X	n.a	n.a	n.a	0	0	0	0
AT5G19860.1	AT5G19860	2	2	2	17.7	17.7	17.7	20.443	0	36.898	1002400000	8	16	-0.139955	NaN	0.85575	3	-0.995705	2.0043	0.667025	0.615385	1.28241	HC	not assigned.unknown	unknown protein | chr5:6714264-6715875 REVERSE	PF04398	35	35	extracellular	EX	X	n.a	n.a	n.a	0	0	0	0
AT3G12145.1	AT3G12145	19	19	19	68	68	68	35.808	0	323.31	22785000000	18	206	0.334521	0.364245	1.07201	-0.0297241	-0.737491	-0.767215	0.436065	0.846154	1.28222	HC	cell wall.degradation.pectate lyases and polygalacturonases	Symbols: FLR1, FLOR1 | FLR1; enzyme inhibitor/ transcription factor binding | chr3:3874499-3876237 REVERSE	PF13516,PF08263	10	10.6	extracellular	EX	X	n.a	n.a	n.a	0	0	0	0
AT4G14110.1	AT4G14110	3	3	3	18.3	18.3	18.3	22.546	0	6.3631	153330000	6	5	-0.449061	NaN	-0.372459	3	-0.0766018	2.9234	0.743617	0.538462	1.28208	HC	signalling.light.COP9 signalosome	Symbols: COP9, CSN8, FUS7, EMB143 | COP9 (CONSTITUTIVE PHOTOMORPHOGENIC 9); metalloendopeptidase/ protein binding | chr4:8132886-8134920 REVERSE	PF10075	30	30.11	nucleus	N	X	n.a	n.a	n.a	0	0	0	0
AT4G12730.1	AT4G12730	11	11	11	40.4	40.4	40.4	43.448	0	151.69	3051400000	17	54	-0.208738	-0.065862	0.420433	-0.142876	-0.629171	-0.772047	0.435663	0.846154	1.28182	HC	cell wall.cell wall proteins.AGPs.AGP	Symbols: FLA2 | FLA2 (FASCICLIN-LIKE ARABINOGALACTAN 2) | chr4:7491383-7492876 REVERSE	PF02469,PF02469	10	10.5	plasma membrane	PM	X	n.a	n.a	n.a	0	0	0	0
AT4G18800.1	AT4G18800	8	2	2	39.3	10.7	10.7	23.869	0.0005832	3.1309	98541000	13	4	-0.823044	NaN	-0.728251	3	-0.0947936	2.90521	0.742101	0.538462	1.28056	HC	signalling.G-proteins	Symbols: ATHSGBP, ATRAB11B, ATRABA1D | ATRABA1D (ARABIDOPSIS RAB GTPASE HOMOLOG A1D); GTP binding | chr4:10319862-10321551 REVERSE	PF00071	30	30.5	golgi	G	X	n.a	n.a	n.a	0	0	0	0
AT3G26720.1;AT3G26720.4;AT3G26720.2;AT3G26720.3;AT3G26720.5	AT3G26720	24	24	24	32.3	32.3	32.3	115.22	0	323.31	5631700000	50	144	-0.279455	-0.137385	0.377852	-0.14207	-0.657307	-0.799377	0.433385	0.846154	1.27954	HC	misc.gluco-, galacto- and mannosidases.alpha-mannosidase	glycosyl hydrolase family 38 protein | chr3:9816581-9823186 FORWARD	PF01074,PF07748,PF09261,PF17677	26	26.3	extracellular	EX	X	n.a	n.a	n.a	0	0	0	0
AT3G51160.1	AT3G51160	12	12	12	42.4	42.4	42.4	41.961	0	76.237	1535200000	22	37	-0.506724	NaN	-0.397375	3	-0.109349	2.89065	0.740888	0.538462	1.27935	HC	cell wall.precursor synthesis.GMD	Symbols: MUR1, MUR_1, GMD2 | MUR1 (MURUS 1); GDP-mannose 4,6-dehydratase | chr3:19007010-19008427 REVERSE	PF16363	10	10.1	cytosol	C	X	n.a	n.a	n.a	0	0	0	0
AT5G60360.1;AT5G60360.2;AT5G60360.3	AT5G60360	8	8	7	40.2	40.2	36.9	38.959	0	52.349	2220900000	18	54	-0.693559	NaN	0.354418	3	-1.04798	1.95202	0.662669	0.615385	1.27805	HC	protein.degradation.cysteine protease	Symbols: AALP | AALP (Arabidopsis aleurain-like protease); cysteine-type peptidase | chr5:24279897-24282368 FORWARD	PF00112,PF08246	29	29.5.3	vacuole,extracellular	V,EX	X	n.a	n.a	n.a	0	0	0	0
AT3G08680.2;AT3G08680.1	AT3G08680	5	5	5	11.1	11.1	11.1	69.406	0	25.024	204590000	30	17	-1.09635	0.0982064	-1.46934	-1.19455	0.372995	-0.821557	0.431537	0.846154	1.27769	HC	signalling.receptor kinases.leucine rich repeat III	leucine-rich repeat transmembrane protein kinase, putative | chr3:2637592-2640838 FORWARD	PF07714,PF08263	30	30.2	plasma membrane	PM	X	n.a	n.a	n.a	0	0	0	0
AT4G13350.2;AT4G13350.1	AT4G13350	5	5	5	10.1	10.1	10.1	65.026	0	8.9811	297080000	13	11	-0.578494	NaN	-0.441776	3	-0.136719	2.86328	0.738607	0.538462	1.27707	HC	signalling.G-proteins	Symbols: NIG | NIG (NSP (NUCLEAR SHUTTLE PROTEIN)-INTERACTING GTPASE); GTP binding / GTPase | chr4:7769770-7773666 REVERSE	PF01412	30	30.5	cytosol,nucleus	C,N	X	n.a	n.a	n.a	0	0	0	0
AT1G75900.1	AT1G75900	9	9	9	39.6	39.6	39.6	39.815	0	88.482	814240000	19	31	0.419415	-0.342105	-0.758242	0.76152	1.17766	1.93918	0.661598	0.615385	1.27698	HC	development.unspecified	family II extracellular lipase 3 (EXL3) | chr1:28499060-28501138 FORWARD	PF00657	33	33.99	extracellular	EX	X	n.a	n.a	n.a	0	0	0	0
AT1G78830.1	AT1G78830	26	26	18	54.1	54.1	39.6	50.342	0	323.31	52104000000	26	421	1.18023	1.33508	1.85856	-0.154847	-0.678325	-0.833172	0.430569	0.846154	1.27672	HC	misc.myrosinases-lectin-jacalin	curculin-like (mannose-binding) lectin family protein | chr1:29636955-29638552 REVERSE	PF01453	26	26.16	extracellular	EX	X	n.a	n.a	n.a	0	0	0	0
AT1G06400.1	AT1G06400	9	7	7	40.7	33.3	33.3	23.927	0	15.95	341060000	13	20	-0.518185	NaN	-0.363032	3	-0.155153	2.84485	0.737071	0.538462	1.27553	HC	signalling.G-proteins	Symbols: ARA2, ATRABA1A, ATRAB11E, ARA-2 | ARA-2; GTP binding | chr1:1950844-1952785 REVERSE	PF00071	30	30.5	golgi	G	X	n.a	n.a	n.a	0	0	0	0
AT3G11730.1	AT3G11730	2	2	2	13.2	13.2	13.2	22.724	0	6.9687	141970000	16	2	-0.441972	NaN	-0.285366	3	-0.156606	2.84339	0.73695	0.538462	1.27541	HC	signalling.G-proteins	Symbols: ATFP8, ATRABD1, RABD1 | ATFP8; GTP binding / GTP-dependent protein binding / myosin XI tail binding | chr3:3709325-3711529 REVERSE	PF00071	30	30.5	golgi	G	X	n.a	n.a	n.a	0	0	0	0
AT2G38860.2;AT2G38860.1;AT2G38860.3	AT2G38860	6	6	5	16.6	16.6	14.1	42.729	0	18.777	1342500000	19	15	-0.816708	NaN	0.264489	3	-1.0812	1.9188	0.6599	0.615385	1.27528	HC	development.unspecified	Symbols: YLS5 | YLS5 | chr2:16233315-16235234 REVERSE	PF01965,PF01965	33	33.99	extracellular,mitochondrion	EX,M	X	n.a	n.a	n.a	0	0	0	0
AT2G30140.2;AT2G30140.1	AT2G30140	1	1	1	3.5	3.5	3.5	51.599	0	4.4766	168470000	18	5	-0.783506	NaN	-0.621097	3	-0.162409	2.83759	0.736466	0.538462	1.27493	HC	misc.UDP glucosyl and glucoronyl transferases	UDP-glucoronosyl/UDP-glucosyl transferase family protein | chr2:12872134-12873820 FORWARD	PF00201	26	26.2	peroxisome,cytosol	PX,C	X	n.a	n.a	n.a	0	0	0	0
AT5G16510.2;AT5G16510.1	AT5G16510	12	11	11	53.4	51.4	51.4	38.585	0	112.55	781450000	21	31	-0.813448	-0.679769	-0.0919817	-0.13368	-0.721467	-0.855146	0.428738	0.846154	1.27489	HC	cell wall.cell wall proteins.RGP	reversibly glycosylated polypeptide, putative | chr5:5392793-5394568 FORWARD	PF03214	10	10.5	cytosol,extracellular	C,EX	X	n.a	n.a	n.a	0	0	0	0
AT1G01980.1	AT1G01980	4	1	1	5	2	2	60.102	0.0064888	2.1075	516490000	34	12	-0.890176	-0.549085	-0.374069	-0.341091	-0.516107	-0.857198	0.428567	0.846154	1.27472	HC	misc.nitrilases, *nitrile lyases, berberine bridge enzymes, reticuline oxidases, troponine reductases	Symbols: ATSEC1A, SEC1A | ATSEC1A; FAD binding / catalytic/ electron carrier/ oxidoreductase | chr1:340172-341999 REVERSE	PF01565,PF08031	26	26.8	plasma membrane	PM	X	n.a	n.a	n.a	0	0	0	0
AT5G65430.1;AT5G65430.2;AT5G65430.3	AT5G65430	19	8	8	69.8	37.1	37.1	28.028	0	133.8	3197700000	16	44	-0.307408	NaN	-0.137593	3	-0.169815	2.83019	0.735849	0.538462	1.27431	HC	signalling.14-3-3 proteins	Symbols: GRF8, 14-3-3KAPPA, GF14 KAPPA | GRF8 (GENERAL REGULATORY FACTOR 8); protein binding / protein phosphorylated amino acid binding | chr5:26148201-26150342 REVERSE	PF00244	30	30.7	cytosol,mitochondrion	C,M	X	n.a	n.a	n.a	0	0	0	0
AT4G33420.1;AT4G33420.2	AT4G33420	7	7	7	30.2	30.2	30.2	35.975	0	52.795	361940000	18	20	-0.72986	0.00598818	-0.595488	-0.735848	-0.134372	-0.87022	0.427482	0.846154	1.27364	HC	misc.peroxidases	peroxidase, putative | chr4:16084828-16086296 FORWARD	PF00141	26	26.12	extracellular	EX	X	n.a	n.a	n.a	0	0	0	0
AT5G56870.1	AT5G56870	19	17	15	39.5	37.4	34.4	80.59	0	159.91	2024400000	41	77	-0.869913	0.00716183	-0.871752	-0.877074	0.00183983	-0.875235	0.427064	0.846154	1.27322	HC	misc.gluco-, galacto- and mannosidases.beta-galactosidase	Symbols: BGAL4 | BGAL4 (beta-galactosidase 4); beta-galactosidase | chr5:23004196-23008649 FORWARD	PF01301,PF17834	26	26.3	extracellular	EX	X	n.a	n.a	n.a	0	0	0	0
AT1G75040.1	AT1G75040	12	12	12	69.9	69.9	69.9	25.252	0	179.17	4970100000	13	82	0.232322	NaN	1.34678	3	-1.11446	1.88554	0.657129	0.615385	1.27251	HC	stress.biotic	Symbols: PR5, PR-5 | PR5 (PATHOGENESIS-RELATED GENE 5) | chr1:28177703-28178940 FORWARD	PF00314	20	20.1	extracellular	EX	X	n.a	n.a	n.a	0	0	0	0
AT4G17030.1	AT4G17030	5	5	5	22	22	22	27.933	0	15.922	596100000	9	17	-0.197796	0.395523	0.0990386	-0.593319	-0.296834	-0.890153	0.425821	0.846154	1.27197	HC	cell wall.modification	Symbols: ATEXLB1, EXPR, AT-EXPR, ATEXPR1, ATHEXP BETA 3.1 | ATEXLB1 (ARABIDOPSIS THALIANA EXPANSIN-LIKE B1) | chr4:9581586-9583290 REVERSE	PF03330,PF01357	10	10.7	extracellular	EX	X	n.a	n.a	n.a	0	0	0	0
AT3G29360.1;AT3G29360.2	AT3G29360	27	27	11	62.5	62.5	29.8	53.172	0	226.83	10276000000	29	172	0.0326054	-0.130911	1.10346	0.163516	-1.07086	-0.907343	0.424388	0.846154	1.27054	HC	cell wall.precursor synthesis.UDP-Glc dehydrogenase (UGD)	UDP-glucose 6-dehydrogenase, putative | chr3:11267091-11269229 REVERSE	PF03720,PF03721,PF00984	10	10.1	extracellular,cytosol	EX,C	X	n.a	n.a	n.a	0	0	0	0
AT2G30060.1	AT2G30060	12	7	7	54.8	44.7	44.7	24.389	0	76.395	592100000	12	26	-0.305504	NaN	-0.0727688	3	-0.232735	2.76726	0.730605	0.538462	1.26907	HC	signalling.G-proteins	Ran-binding protein 1b (RanBP1b) | chr2:12826915-12828919 FORWARD	PF00638	30	30.5	cytosol	C	X	n.a	n.a	n.a	0	0	0	0
AT1G28170.1	AT1G28170	2	2	2	6.7	6.7	6.7	37.808	0.0024326	2.5587	2208100000	20	5	1.38194	-1.14394	NaN	2.52587	3	5.52587	0.960489	0.307692	1.26818	HC	lipid metabolism.'exotics'(steroids, squalene etc)	sulfotransferase family protein | chr1:9841332-9842312 FORWARD	PF00685	11	11.8	cytosol	C	X	n.a	n.a	n.a	0	0	0	0
AT1G14380.4;AT1G14380.3;AT1G14380.1;AT1G14380.6;AT1G14380.5;AT1G14380.2;AT1G14380.7	AT1G14380	4	4	4	7.8	7.8	7.8	72.848	0	10.226	189540000	31	7	-0.994792	NaN	-0.743845	3	-0.250946	2.74905	0.729088	0.538462	1.26755	HC	signalling.calcium	Symbols: IQD28 | IQD28 (IQ67 DOMAIN PROTEIN 28); calmodulin binding | chr1:4918010-4921596 REVERSE	PF00612,PF00612,PF13178	30	30.3	cytosol,nucleus	C,N	X	n.a	n.a	n.a	0	0	0	0
AT3G15950.1;AT3G15950.2;AT3G15950.4;AT3G15950.3;AT3G15950.5	AT3G15950	38	37	37	48.1	47.2	47.2	85.015	0	193.83	3722100000	51	80	-0.366437	-1.74024	-0.804935	1.3738	0.438497	1.8123	0.651025	0.615385	1.26641	HC	DNA.unspecified	Symbols: NAI2 | NAI2 | chr3:5397569-5402652 REVERSE	#N/A	28	28.99	endoplasmic reticulum	ER	X	n.a	n.a	n.a	0	0	0	0
AT4G29510.1	AT4G29510	3	3	3	11	11	11	43.893	0	7.6939	248300000	16	7	-0.771478	NaN	-0.503477	3	-0.268001	2.732	0.727667	0.538462	1.26613	HC	misc.O-methyl transferases	Symbols: ATPRMT11, PRMT11, ATPRMT1B, PRMT1B | PRMT11 (ARGININE METHYLTRANSFERASE 11); protein-arginine N-methyltransferase | chr4:14491625-14494001 FORWARD	PF06325	26	26.6	cytosol	C	X	n.a	n.a	n.a	0	0	0	0
AT2G39030.1	AT2G39030	8	8	7	31.1	31.1	26.8	25.821	0	54.954	1829300000	10	14	-0.0446198	NaN	0.232432	3	-0.277052	2.72295	0.726912	0.538462	1.26537	HC	misc.GCN5-related N-acetyltransferase	GCN5-related N-acetyltransferase (GNAT) family protein | chr2:16298227-16299202 FORWARD	PF00583	26	26.24	cytosol	C	X	n.a	n.a	n.a	0	0	0	0
AT2G46370.3;AT2G46370.2;AT2G46370.1;AT2G46370.4	AT2G46370	3	3	3	7.5	7.5	7.5	55.194	0	5.7836	1710500000	22	8	1.19412	NaN	-1.2875	3	2.48163	5.48163	0.956802	0.307692	1.26449	HC	hormone metabolism.auxin.induced-regulated-responsive-activated	Symbols: JAR1, FIN219 | JAR1 (JASMONATE RESISTANT 1); ATP binding / adenylyltransferase/ catalytic/ jasmonate-amino synthetase | chr2:19033790-19036659 FORWARD	PF03321	17	17.2	cytosol	C	X	n.a	n.a	n.a	0	0	0	0
AT4G00230.1;AT4G00230.2	AT4G00230	15	15	15	31.2	31.2	31.2	80.328	0	100.71	1245000000	34	63	-0.270415	-0.933921	-1.39005	0.663507	1.11964	1.78315	0.648596	0.615385	1.26398	HC	protein.degradation.subtilases	Symbols: XSP1 | XSP1 (xylem serine peptidase 1); identical protein binding / serine-type endopeptidase | chr4:93923-97454 FORWARD	PF17766,PF00082,PF05922	29	29.5.1	extracellular	EX	X	n.a	n.a	n.a	0	0	0	0
AT3G55260.1	AT3G55260	14	13	13	35.9	34.4	34.4	61.229	0	77.684	1578400000	23	38	-0.879237	NaN	0.346518	3	-1.22575	1.77425	0.647854	0.615385	1.26324	HC	protein.glycosylation.alpha-1,3-mannosyl-glycoprotein-beta-1,2-N-acetylglucosaminyltransferase(GnTI)	Symbols: HEXO1, ATHEX2 | HEXO1 (BETA-HEXOSAMINIDASE 1); beta-N-acetylhexosaminidase/ hexosaminidase/ hydrolase, hydrolyzing O-glycosyl compounds | chr3:20489248-20493076 FORWARD	PF00728,PF14845	29	29.7	extracellular	EX	X	n.a	n.a	n.a	0	0	0	0
AT4G35310.2;AT4G35310.1;AT2G17290.2;AT2G17290.1	AT4G35310	3	3	3	6.5	6.5	6.5	62.127	0.00020421	3.9442	202710000	28	2	-1.10658	NaN	-0.803571	3	-0.303013	2.69699	0.724749	0.538462	1.26321	HC	signalling.calcium.calcium dependent protein kinases	Symbols: CPK5, ATCPK5 | CPK5 (calmodulin-domain protein kinase 5); ATP binding / calcium ion binding / calmodulin-dependent protein kinase/ kinase/ protein kinase/ protein serine/threonine kinase | chr4:16801987-16804995 FORWARD	PF00069,PF13499,PF13499	30	30.3.1	cytosol,nucleus	C,N	X	n.a	n.a	n.a	0	0	0	0
AT2G37180.1	AT2G37180	5	4	4	26.7	14.4	14.4	30.429	0	27.236	350430000	6	25	0.785078	-0.057438	-0.132713	0.842516	0.91779	1.76031	0.646692	0.615385	1.26208	HC	transport.Major Intrinsic Proteins.PIP	Symbols: RD28, PIP2;3, PIP2C | RD28 (RESPONSIVE TO DESICCATION 28); water channel | chr2:15617708-15619155 FORWARD	PF00230	34	34.19.1	plasma membrane	PM	X	n.a	n.a	n.a	0	0	0	0
AT5G45670.1	AT5G45670	7	7	5	37.6	37.6	31.2	39.575	0	33.957	264380000	13	16	-0.577761	0.216044	-0.352931	-0.793805	-0.22483	-1.01864	0.415114	0.846154	1.26127	HC	misc.GDSL-motif lipase	GDSL-motif lipase/hydrolase family protein | chr5:18528494-18530450 FORWARD	PF00657	26	26.28	extracellular	EX	X	n.a	n.a	n.a	0	0	0	0
AT5G05340.1	AT5G05340	11	11	11	50.3	50.3	50.3	34.215	0	186.28	1828100000	11	37	-0.502408	-0.0901796	0.112217	-0.412229	-0.614625	-1.02685	0.414429	0.846154	1.26058	HC	misc.peroxidases	peroxidase, putative | chr5:1578951-1580875 REVERSE	PF00141	26	26.12	extracellular	EX	X	n.a	n.a	n.a	0	0	0	0
AT2G01320.4;AT2G01320.1;AT2G01320.2;AT2G01320.3;AT2G01320.7;AT2G01320.6;AT2G01320.8;AT2G01320.5	AT2G01320	10	10	10	23.3	23.3	23.3	78.898	0	283.85	1346400000	35	76	-0.589022	-1.45247	-1.4559	0.863444	0.866882	1.73033	0.644194	0.615385	1.25958	HC	transport.ABC transporters and multidrug resistance systems	ABC transporter family protein | chr2:154131-158182 REVERSE	PF00005,PF19055,PF01061	34	34.16	peroxisome,plasma membrane,vacuole,plastid	PX,PM,V,P	X	n.a	n.a	n.a	0	0	0	0
AT5G23400.1	AT5G23400	18	18	18	49.2	49.2	49.2	64.017	0	323.31	2806400000	31	102	0.292266	-0.480468	-0.662375	0.772734	0.954641	1.72737	0.643948	0.615385	1.25933	HC	stress.biotic.PR-proteins	disease resistance family protein / LRR family protein | chr5:7880335-7882634 FORWARD	PF08263,PF13855,PF13855,PF13855	20	20.1	extracellular	EX	X	n.a	n.a	n.a	0	0	0	0
AT4G24520.1;AT4G24520.2	AT4G24520	11	11	11	19.5	19.5	19.5	76.765	0	61.087	371640000	38	13	-1.17303	-0.412796	-0.885381	-0.760232	-0.287646	-1.04788	0.412677	0.846154	1.25883	HC	misc.cytochrome P450	Symbols: ATR1, AR1 | ATR1 (ARABIDOPSIS P450 REDUCTASE 1); NADPH-hemoprotein reductase | chr4:12662841-12667161 REVERSE	PF00175,PF00258,PF00667	26	26.10	endoplasmic reticulum	ER	X	n.a	n.a	n.a	0	0	0	0
AT1G05500.1;AT1G05500.2	AT1G05500	7	7	7	19.3	19.3	19.3	62.928	0	56.298	693630000	27	26	-0.352274	-1.39274	-1.01958	1.04046	0.66731	1.70777	0.642315	0.615385	1.2577	HC	not assigned.no ontology.C2 domain-containing protein	Symbols: SYTE, ATSYTE, NTMC2TYPE2.1, NTMC2T2.1 | NTMC2T2.1 | chr1:1624955-1629224 FORWARD	PF00168,PF00168,PF17047	35	35	plasma membrane	PM	Likely PD protein	n.a	n.a	n.a	0	0	0	0
AT5G19690.1;AT5G19690.2	AT5G19690	6	6	6	10.9	10.9	10.9	86.112	0	27.836	446440000	23	19	-0.12216	-0.868391	-1.07776	0.746231	0.955601	1.70183	0.641819	0.615385	1.2572	HC	stress.abiotic.drought/salt	Symbols: STT3A | STT3A (STAUROSPORIN AND TEMPERATURE SENSITIVE 3-LIKE A); oligosaccharyl transferase | chr5:6652516-6658411 FORWARD	PF02516	20	20.2	endoplasmic reticulum	ER	X	n.a	n.a	n.a	0	0	0	0
AT3G46440.2;AT3G46440.1	AT3G46440	23	5	4	73.6	28.4	24.3	38.389	0	77.692	901170000	19	19	-0.616708	NaN	-0.24053	3	-0.376178	2.62382	0.718652	0.538462	1.25711	HC	cell wall.precursor synthesis.UXS	Symbols: UXS5 | UXS5; UDP-glucuronate decarboxylase/ catalytic | chr3:17089045-17091875 REVERSE	PF16363	10	10.1	cytosol	C	X	n.a	n.a	n.a	0	0	0	0
AT4G34980.1	AT4G34980	21	21	21	43.3	43.3	43.3	81.045	0	109.51	2917000000	36	125	0.148099	-0.453334	-0.944442	0.601432	1.09254	1.69397	0.641164	0.615385	1.25655	HC	protein.degradation.subtilases	Symbols: SLP2 | SLP2; serine-type peptidase | chr4:16656691-16659339 REVERSE	PF05922,PF17766,PF00082,PF02225	29	29.5.1	extracellular	EX	X	n.a	n.a	n.a	0	0	0	0
AT5G10560.1	AT5G10560	15	14	14	18.8	17.9	17.9	87.184	0	84.463	1778400000	44	51	-0.918419	-0.808218	0.0524997	-0.110201	-0.970919	-1.08112	0.409907	0.846154	1.25606	HC	cell wall.degradation.mannan-xylose-arabinose-fucose	glycosyl hydrolase family 3 protein | chr5:3336255-3339366 REVERSE	PF01915,PF00933,PF14310	10	10.6	extracellular	EX	X	n.a	n.a	n.a	0	0	0	0
AT5G23210.2;AT5G23210.5;AT5G23210.1;AT5G23210.4;AT5G23210.3	AT5G23210	18	18	18	45.9	45.9	45.9	45.726	0	159.85	3349300000	20	121	0.59045	-0.393958	-0.111807	0.984408	0.702258	1.68667	0.640555	0.615385	1.25594	HC	protein.degradation.serine protease	Symbols: SCPL34 | SCPL34; serine-type carboxypeptidase | chr5:7810683-7815039 FORWARD	PF00450	29	29.5.5	extracellular,vacuole,peroxisome	EX,V,PX	X	n.a	n.a	n.a	0	0	0	0
AT3G51600.1	AT3G51600	2	2	2	12.7	12.7	12.7	12.495	0.0020751	2.6459	4646600000	4	21	2.06674	1.42073	1.05033	0.646009	1.01641	1.66242	0.638535	0.615385	1.25392	HC	lipid metabolism.lipid transfer proteins etc	Symbols: LTP5 | LTP5 (Lipid transfer protein 5); lipid transporter | chr3:19138394-19139252 REVERSE	PF00234	11	11.6	extracellular	EX	X	n.a	n.a	n.a	0	0	0	0
AT3G14310.1	AT3G14310	24	24	23	47	47	45.8	64.255	0	323.31	41981000000	30	281	0.414129	0.220764	1.71858	0.193365	-1.30445	-1.11109	0.407409	0.846154	1.25356	HC	cell wall.pectin*esterases.PME	Symbols: ATPME3 | ATPME3; pectinesterase | chr3:4771902-4775119 REVERSE	PF04043,PF01095	10	10.8	extracellular	EX	X	n.a	n.a	n.a	0	0	0	0
AT5G49760.1	AT5G49760	11	11	10	15.6	15.6	13.9	104.71	0	96.719	902380000	44	32	-1.273	-0.596895	-0.834218	-0.676107	-0.438785	-1.11489	0.407092	0.846154	1.25325	HC	signalling.receptor kinases.leucine rich repeat VIII.VIII-1	leucine-rich repeat family protein / protein kinase family protein | chr5:20216372-20221299 FORWARD	PF00069,PF08263	30	30.2	plasma membrane	PM	X	n.a	n.a	n.a	0	0	0	0
AT4G01610.2;AT4G01610.1	AT4G01610	7	7	7	24.5	24.5	24.5	39.344	0	145.73	1943100000	16	53	-0.776041	NaN	0.579974	3	-1.35602	1.64398	0.636999	0.615385	1.25238	HC	protein.degradation.cysteine protease	cathepsin B-like cysteine protease, putative | chr4:694695-697206 FORWARD	PF00112,PF08127	29	29.5.3	extracellular	EX	X	n.a	n.a	n.a	0	0	0	0
AT5G63810.1	AT5G63810	22	22	21	39	39	37.9	83.101	0	121.7	2946300000	35	101	-0.659722	-0.0173358	-0.171444	-0.642386	-0.488277	-1.13066	0.405778	0.846154	1.25193	HC	misc.gluco-, galacto- and mannosidases.beta-galactosidase	Symbols: BGAL10 | BGAL10 (beta-galactosidase 10); beta-galactosidase/ catalytic/ cation binding | chr5:25537074-25541529 FORWARD	PF01301,PF17834	26	26.3	extracellular	EX	X	n.a	n.a	n.a	0	0	0	0
AT2G38530.1	AT2G38530	6	5	5	52.5	46.6	46.6	11.938	0	73.558	1987000000	6	31	-0.268994	NaN	1.11435	3	-1.38335	1.61665	0.634721	0.615385	1.25011	HC	lipid metabolism.lipid transfer proteins etc	Symbols: LTP2, LP2 | LTP2 (LIPID TRANSFER PROTEIN 2); lipid binding | chr2:16128378-16129158 FORWARD	PF00234	11	11.6	extracellular	EX	X	n.a	n.a	n.a	0	0	0	0
AT3G57260.1;AT3G57260.2	AT3G57260	14	14	14	47.5	47.5	47.5	37.338	0	198.21	10751000000	12	119	0.180389	-0.0563474	1.58056	0.236736	-1.40017	-1.16343	0.403047	0.846154	1.2492	HC	misc.beta 1,3 glucan hydrolases.glucan endo-1,3-beta-glucosidase	Symbols: BGL2, PR2, BG2, PR-2 | BGL2 (BETA-1,3-GLUCANASE 2); cellulase/ glucan 1,3-beta-glucosidase/ hydrolase, hydrolyzing O-glycosyl compounds | chr3:21188517-21189859 REVERSE	PF00332	26	26.4	extracellular	EX	X	n.a	n.a	n.a	0	0	0	0
AT5G10300.1;AT5G10300.2	AT5G10300	16	16	16	65.5	65.5	65.5	29.216	0	121.78	2680900000	17	40	-0.35881	NaN	0.114884	3	-0.473694	2.52631	0.710526	0.538462	1.24899	HC	misc.nitrilases, *nitrile lyases, berberine bridge enzymes, reticuline oxidases, troponine reductases	Symbols: ATMES5, MES5 | MES5 (METHYL ESTERASE 5); hydrolase | chr5:3239617-3240870 FORWARD	PF12697	26	26.8	vacuole	V	X	n.a	n.a	n.a	0	0	0	0
AT5G06320.1	AT5G06320	6	6	6	22.1	22.1	22.1	25.947	0	83.333	4349000000	12	91	1.13831	0.333406	0.366603	0.804909	0.771712	1.57662	0.631385	0.615385	1.24677	HC	stress.biotic	Symbols: NHL3 | NHL3 | chr5:1930793-1931768 REVERSE	PF03168	20	20.1	plasma membrane	PM	X	n.a	n.a	n.a	0	0	0	0
AT5G20660.1	AT5G20660	7	7	7	12.5	12.5	12.5	100.09	0	71.243	258370000	31	21	-0.851087	-1.27843	-2.00031	0.427347	1.14922	1.57657	0.63138	0.615385	1.24677	HC	protein.degradation	24 kDa vacuolar protein, putative | chr5:6986235-6991043 FORWARD	PF04389	29	29.5	golgi,plasma membrane	G,PM	X	n.a	n.a	n.a	0	0	0	0
AT5G39320.1	AT5G39320	19	7	7	46.9	21.2	21.2	53.096	0	109.71	455810000	29	29	-1.20137	-0.817068	-0.388108	-0.384299	-0.813259	-1.19756	0.400203	0.846154	1.24636	HC	cell wall.precursor synthesis.UDP-Glc dehydrogenase (UGD)	UDP-glucose 6-dehydrogenase, putative | chr5:15742762-15744943 FORWARD	PF00984,PF03721,PF03720	10	10.1	extracellular	EX	X	n.a	n.a	n.a	0	0	0	0
AT2G01470.1	AT2G01470	7	7	7	24.2	24.2	24.2	42.793	0	27.818	523710000	23	33	-0.255393	-0.889259	-1.1931	0.633866	0.937703	1.57157	0.630964	0.615385	1.24635	HC	protein.degradation	Symbols: STL2P, ATSEC12 | STL2P (SEC12P-LIKE 2 PROTEIN); nucleotide binding | chr2:211970-214472 REVERSE	PF00400,PF00400	29	29.5	endoplasmic reticulum	ER	X	n.a	n.a	n.a	0	0	0	0
AT2G34930.1	AT2G34930	18	18	18	24.1	24.1	24.1	100.28	0	127.88	1329000000	49	71	-0.040612	-0.908339	-0.74223	0.867727	0.701618	1.56935	0.630779	0.615385	1.24616	HC	stress.biotic.PR-proteins	disease resistance family protein | chr2:14737066-14739904 REVERSE	PF08263,PF00560,PF13855,PF13855,PF13855,PF13855,PF13855	20	20.1	extracellular	EX	Likely PD protein	n.a	n.a	n.a	0	0	0	0
AT5G63800.1	AT5G63800	29	29	28	48.6	48.6	47.6	79.758	0	181.52	4572600000	34	124	-0.392691	0.0965486	0.320538	-0.48924	-0.713229	-1.20247	0.399794	0.846154	1.24595	HC	misc.gluco-, galacto- and mannosidases.beta-galactosidase	Symbols: MUM2, BGAL6 | MUM2 (MUCILAGE-MODIFIED 2); beta-galactosidase | chr5:25530055-25535849 FORWARD	PF01301,PF17834	26	26.3	extracellular	EX	X	n.a	n.a	n.a	0	0	0	0
AT4G31140.1	AT4G31140	12	12	12	32.9	32.9	32.9	52.715	0	64.747	2060100000	22	56	-0.806955	-0.776586	0.366517	-0.0303691	-1.17347	-1.20384	0.39968	0.846154	1.24583	HC	misc.beta 1,3 glucan hydrolases	glycosyl hydrolase family 17 protein | chr4:15141200-15143391 FORWARD	PF07983,PF00332	26	26.4	plasma membrane	PM	Likely PD protein	n.a	n.a	n.a	0	0	0	0
AT4G30140.1	AT4G30140	4	4	4	12.4	12.4	12.4	37.47	0	9.6895	413480000	13	14	-0.264842	0.353575	0.326249	-0.618417	-0.591091	-1.20951	0.399208	0.846154	1.24536	HC	misc.GDSL-motif lipase	GDSL-motif lipase/hydrolase family protein | chr4:14738387-14740676 REVERSE	PF00657	26	26.28	extracellular	EX	X	n.a	n.a	n.a	0	0	0	0
AT5G59150.1	AT5G59150	6	2	0	33.6	21.2	0	23.816	0	8.11	318010000	12	12	-0.616356	NaN	-0.0954112	3	-0.520944	2.47906	0.706588	0.538462	1.24505	HC	signalling.G-proteins	Symbols: ATRABA2D, ATRAB-A2D | ATRABA2D (HOARABIDOPSIS RAB GTPASE HOMOLOG A2D); GTP binding | chr5:23876586-23878429 FORWARD	PF00071	30	30.5	cytosol,golgi,plasma membrane	C,G,PM	X	n.a	n.a	n.a	0	0	0	0
AT5G57110.3;AT5G57110.2;AT5G57110.1	AT5G57110	10	10	10	10.9	10.9	10.9	116.17	0	42.739	596950000	45	48	-0.451195	-1.08906	-1.368	0.637864	0.916807	1.55467	0.629556	0.615385	1.24494	HC	transport.calcium	Symbols: ACA8, AT-ACA8 | ACA8 (AUTOINHIBITED CA2+ -ATPASE, ISOFORM 8); calcium-transporting ATPase/ calmodulin binding / protein self-association | chr5:23109438-23117544 REVERSE	PF12515,PF00702,PF00122,PF00690,PF00689	34	34.21	plasma membrane	PM	X	n.a	n.a	n.a	0	0	0	0
AT2G37170.1;AT2G37170.2	AT2G37170	6	4	4	29.8	14	14	30.453	0	41.395	1196700000	7	59	0.908337	0.0141511	0.252237	0.894186	0.6561	1.55029	0.629191	0.615385	1.24458	HC	transport.Major Intrinsic Proteins.PIP	Symbols: PIP2B, PIP2;2 | PIP2B (PLASMA MEMBRANE INTRINSIC PROTEIN 2); water channel | chr2:15613402-15614857 REVERSE	PF00230	34	34.19.1	plasma membrane	PM	X	n.a	n.a	n.a	0	0	0	0
AT5G15490.1	AT5G15490	27	12	10	63.8	31.5	28.8	53.117	0	117.83	2231200000	29	49	-0.801353	-0.493306	0.15429	-0.308048	-0.955644	-1.26369	0.394692	0.846154	1.24085	HC	cell wall.precursor synthesis.UDP-Glc dehydrogenase (UGD)	UDP-glucose 6-dehydrogenase, putative | chr5:5027639-5030194 REVERSE	PF03721,PF00984,PF03720	10	10.1	extracellular	EX	X	n.a	n.a	n.a	0	0	0	0
AT1G50300.2;AT1G50300.1	AT1G50300	1	1	1	3.9	3.9	3.9	31.28	0.00019493	3.1725	116760000	14	3	-0.874886	NaN	-0.298885	3	-0.576002	2.424	0.702	0.538462	1.24046	HC	signalling.G-proteins	Symbols: TAF15 | TAF15 (TBP-associated factor 15); RNA binding / nucleic acid binding / nucleotide binding / zinc ion binding | chr1:18628555-18631946 REVERSE	PF00076,PF00641,PF00641	30	30.5	nucleus	N	X	n.a	n.a	n.a	0	0	0	0
AT3G07880.1	AT3G07880	4	4	4	35.8	35.8	35.8	27.231	0	45.057	380460000	15	13	-1.08737	NaN	-0.506685	3	-0.580681	2.41932	0.70161	0.538462	1.24007	HC	signalling.G-proteins	Rho GDP-dissociation inhibitor family protein | chr3:2513971-2515823 FORWARD	PF02115	30	30.5	cytosol	C	X	n.a	n.a	n.a	0	0	0	0
AT5G34850.1	AT5G34850	19	19	19	65.9	65.9	65.9	55.009	0	296.19	8589600000	25	140	-0.597108	-0.660143	0.760015	0.0630355	-1.35712	-1.29409	0.392159	0.846154	1.23831	HC	misc.acid and other phosphatases	Symbols: ATPAP26, PAP26 | PAP26 (PURPLE ACID PHOSPHATASE 26); acid phosphatase/ protein serine/threonine phosphatase | chr5:13108154-13111631 REVERSE	PF00149,PF16656,PF14008	26	26.13	extracellular	EX	X	n.a	n.a	n.a	0	0	0	0
AT2G32240.1	AT2G32240	61	61	60	49.1	49.1	48.4	148.61	0	323.31	9010600000	94	213	-1.13571	NaN	0.395313	3	-1.53102	1.46898	0.622415	0.615385	1.2378	HC	not assigned.unknown	FUNCTIONS IN: molecular_function unknown; INVOLVED IN: response to cadmium ion; LOCATED IN: plasma membrane; EXPRESSED IN: 25 plant structures; EXPRESSED DURING: 13 growth stages; CONTAINS InterPro DOMAIN/s: Prefoldin (InterPro:IPR009053); BEST Arabidopsis thaliana protein match is: unknown protein (TAIR:AT1G05320.3); Has 221693 Blast hits to 95553 proteins in 2574 species: Archae - 2848; Bacteri…	#N/A	35	35	endoplasmic reticulum	ER	X	n.a	n.a	n.a	0	0	0	0
AT1G12640.1;AT1G63050.1	AT1G12640	1	1	1	2.4	2.4	2.4	52.152	0.0024317	2.5496	389330000	16	11	0.0468059	-0.894846	-0.475167	0.941652	0.521973	1.46362	0.621969	0.615385	1.23735	HC	not assigned.no ontology	membrane bound O-acyl transferase (MBOAT) family protein | chr1:4303312-4305798 REVERSE	PF03062	35	35	endoplasmic reticulum	ER	X	n.a	n.a	n.a	0	0	0	0
AT4G02350.2;AT4G02350.1	AT4G02350	6	6	6	11.2	11.2	11.2	88.37	0	12.785	135190000	43	15	-0.975353	-1.54078	-1.85056	0.565427	0.875209	1.44064	0.620053	0.615385	1.23544	HC	cell.vesicle transport	exocyst complex subunit Sec15-like family protein | chr4:1038114-1040774 FORWARD	PF04091	31	31.4	cytosol,plasma membrane	C,PM	X	n.a	n.a	n.a	0	0	0	0
AT2G29420.1	AT2G29420	5	5	5	37.4	37.4	37.4	26.112	0	20.409	568070000	15	23	-0.855312	NaN	-0.177575	3	-0.677737	2.32226	0.693522	0.538462	1.23198	HC	misc.glutathione S transferases	Symbols: ATGSTU7, GST25 | ATGSTU7 (ARABIDOPSIS THALIANA GLUTATHIONE S-TRANSFERASE TAU 7); glutathione transferase | chr2:12617936-12618899 REVERSE	PF00043,PF02798	26	26.9	cytosol	C	X	n.a	n.a	n.a	0	0	0	0
AT3G56310.1;AT3G56310.2	AT3G56310	8	8	8	24.3	24.3	24.3	48.362	0	101.68	2257100000	21	38	-1.11104	NaN	0.498094	3	-1.60913	1.39087	0.615906	0.615385	1.23129	HC	minor CHO metabolism.galactose.alpha-galactosidases	alpha-galactosidase, putative / melibiase, putative / alpha-D-galactoside galactohydrolase, putative | chr3:20882803-20885915 FORWARD	PF16499,PF17801	3	3.8	extracellular	EX	X	n.a	n.a	n.a	0	0	0	0
AT5G16990.1	AT5G16990	10	3	3	37.3	8.2	8.2	37.988	0	4.9647	305530000	19	13	-1.05143	NaN	-0.363876	3	-0.687551	2.31245	0.692704	0.538462	1.23117	HC	misc.oxidases - copper, flavone etc	NADP-dependent oxidoreductase, putative | chr5:5581658-5584029 REVERSE	PF00107,PF16884	26	26.7	cytosol	C	X	n.a	n.a	n.a	0	0	0	0
AT5G56280.1	AT5G56280	3	3	2	14.2	14.2	10.7	35.658	0	23.779	498370000	16	10	-1.04298	NaN	-0.351577	3	-0.691406	2.30859	0.692383	0.538462	1.23084	HC	signalling.light.COP9 signalosome	Symbols: CSN6A | CSN6A | chr5:22783384-22785577 REVERSE	PF01398,PF13012	30	30.11	nucleus	N	X	n.a	n.a	n.a	0	0	0	0
AT1G79940.4;AT1G79940.3;AT1G79940.2;AT1G79940.1	AT1G79940	9	9	9	20.4	20.4	20.4	66.487	0	174.16	533330000	32	34	-0.455219	-1.35137	-0.941515	0.89615	0.486295	1.38245	0.615204	0.615385	1.23059	HC	stress.abiotic.heat	Symbols: ATERDJ2A | ATERDJ2A; heat shock protein binding / unfolded protein binding | chr1:30069550-30073332 FORWARD	PF00226,PF02889	20	20.2	endoplasmic reticulum	ER	X	n.a	n.a	n.a	0	0	0	0
AT5G09550.1	AT5G09550	5	1	1	16	2	2	49.549	0.0045788	2.2681	459790000	21	4	-0.854928	NaN	-0.159037	3	-0.695891	2.30411	0.692009	0.538462	1.23047	HC	signalling.G-proteins	RAB GDP-dissociation inhibitor | chr5:2963777-2966727 FORWARD	PF00996	30	30.5	cytosol	C	X	n.a	n.a	n.a	0	0	0	0
AT1G20225.1	AT1G20225	7	7	7	39.1	39.1	39.1	26.052	0	94.736	4146700000	15	43	0.504116	-0.0103707	-0.360637	0.514487	0.864753	1.37924	0.614937	0.615385	1.23032	HC	not assigned.unknown	FUNCTIONS IN: molecular_function unknown; INVOLVED IN: biological_process unknown; LOCATED IN: vacuole; CONTAINS InterPro DOMAIN/s: Thioredoxin-like fold (InterPro:IPR012336); BEST Arabidopsis thaliana protein match is: unknown protein (TAIR:AT1G76020.1); Has 156 Blast hits to 152 proteins in 51 species: Archae - 0; Bacteria - 81; Metazoa - 14; Fungi - 6; Plants - 28; Viruses - 0; Other Eukaryote…	PF13462	35	35	extracellular	EX	X	n.a	n.a	n.a	0	0	0	0
AT3G57330.2;AT3G57330.1	AT3G57330	5	5	4	6.6	6.6	5.5	105.46	0	19.788	120980000	40	12	-1.9253	NaN	-1.22603	3	-0.699269	2.30073	0.691728	0.538462	1.23019	HC	signalling.calcium	Symbols: ACA11 | ACA11 (autoinhibited Ca2+-ATPase 11); calcium-transporting ATPase/ calmodulin binding | chr3:21211456-21216375 REVERSE	PF00122,PF00689,PF00690,PF00702,PF12515	30	30.3	vacuole	V	X	n.a	n.a	n.a	0	0	0	0
AT1G64090.1;AT1G64090.2	AT1G64090	9	9	8	30.2	30.2	30.2	28.696	0	34.141	2402000000	9	62	0.535819	-0.20987	-0.0809881	0.745689	0.616807	1.3625	0.613541	0.615385	1.22893	HC	not assigned.no ontology	reticulon family protein (RTNLB3) | chr1:23789309-23790922 FORWARD	PF02453	35	35	endoplasmic reticulum,cytosol	ER,C	Likely PD protein	n.a	n.a	n.a	0	0	0	0
AT5G05390.1	AT5G05390	6	6	6	18.6	18.6	18.6	62.733	0	43.883	682480000	23	23	-0.0973512	-0.526249	-1.02358	0.428898	0.92623	1.35513	0.612927	0.615385	1.22831	HC	secondary metabolism.simple phenols	Symbols: LAC12 | LAC12 (laccase 12); laccase | chr5:1594753-1597042 FORWARD	PF00394,PF07731,PF07732	16	16.10	extracellular	EX	Likely PD protein	n.a	n.a	n.a	0	0	0	0
AT1G52400.3;AT1G52400.1;AT1G52400.2	AT1G52400	44	44	41	74.6	74.6	74.6	60.459	0	323.31	306560000000	27	1052	1.27751	2.02583	1.94421	-0.748314	-0.666695	-1.41501	0.382083	0.846154	1.22824	HC	misc.gluco-, galacto- and mannosidases	Symbols: BGL1, BGLU18 | BGLU18 (BETA GLUCOSIDASE 18); catalytic/ cation binding / hydrolase, hydrolyzing O-glycosyl compounds | chr1:19515151-19518160 FORWARD	PF00232	26	26.3	peroxisome,endoplasmic reticulum,extracellular	PX,ER,EX	X	n.a	n.a	n.a	0	0	0	0
AT1G07140.1	AT1G07140	15	15	9	63.6	63.6	45.2	25.601	0	201.16	3373800000	13	108	-0.0984813	NaN	0.641587	3	-0.740068	2.25993	0.688328	0.538462	1.22679	HC	signalling.G-proteins	Symbols: SIRANBP | SIRANBP; Ran GTPase binding | chr1:2191723-2193793 REVERSE	PF00638	30	30.5	cytosol	C	X	n.a	n.a	n.a	0	0	0	0
AT1G20450.2;AT1G20450.1	AT1G20450	16	15	15	60.2	56.8	56.8	29.443	0	315.44	24845000000	15	167	1.19124	-0.369129	1.41661	1.56037	-0.22536	1.33501	0.611251	0.615385	1.22664	HC	stress.abiotic.unspecified	Symbols: LTI29, LTI45, ERD10 | ERD10 (EARLY RESPONSIVE TO DEHYDRATION 10); actin binding | chr1:7088003-7089606 REVERSE	PF00257,PF00257	20	20.2	cytosol,plasma membrane	C,PM	X	n.a	n.a	n.a	0	0	0	0
AT4G12640.4;AT4G12640.3;AT4G12640.2;AT4G12640.1	AT4G12640	2	2	2	4.2	4.2	4.2	78.259	0.0035172	2.3936	79688000	43	1	-1.04565	-0.289064	NaN	-0.756588	3	2.24341	0.686951	0.538462	1.22541	HC	signalling.G-proteins	RNA recognition motif (RRM)-containing protein | chr4:7462599-7467862 FORWARD	PF00076,PF00076,PF07744	30	30.5	nucleus	N	X	n.a	n.a	n.a	0	0	0	0
AT4G30610.1	AT4G30610	11	11	11	26.9	26.9	26.9	52.844	0	89.388	1614600000	21	52	-0.279863	-1.06731	-0.802556	0.787449	0.522692	1.31014	0.609178	0.615385	1.22456	HC	hormone metabolism.brassinosteroid.signal transduction.other	Symbols: BRS1, SCPL24 | BRS1 (BRI1 SUPPRESSOR 1); serine-type carboxypeptidase | chr4:14944129-14948605 FORWARD	PF00450	17	17.3	extracellular	EX	X	n.a	n.a	n.a	0	0	0	0
AT3G15356.1	AT3G15356	13	13	9	56.5	56.5	41	29.749	0	200.26	4867600000	14	94	0.0223097	0.640013	0.868763	-0.617703	-0.846454	-1.46416	0.377987	0.846154	1.22414	HC	misc.myrosinases-lectin-jacalin	legume lectin family protein | chr3:5174402-5175469 REVERSE	PF00139	26	26.16	extracellular	EX	X	n.a	n.a	n.a	0	0	0	0
AT4G27760.1	AT4G27760	2	2	2	9.3	9.3	9.3	41.481	0	4.3182	380490000	19	2	-1.14607	NaN	0.549115	3	-1.69518	1.30482	0.608735	0.615385	1.22412	HC	development.unspecified	Symbols: FEY, FEY3 | FEY (FOREVER YOUNG); binding / catalytic/ oxidoreductase | chr4:13844065-13846746 FORWARD	PF00106	33	33.99	endoplasmic reticulum	ER	X	n.a	n.a	n.a	0	0	0	0
AT4G31340.2;AT4G31340.1	AT4G31340	12	12	12	25.5	25.5	25.5	47.739	0	61.636	2242300000	17	74	0.316992	-0.591512	-0.069719	0.908504	0.386711	1.29522	0.607935	0.615385	1.22332	HC	cell.organisation	myosin heavy chain-related | chr4:15205480-15209601 FORWARD	#N/A	31	31.1	endoplasmic reticulum,extracellular	ER,EX	X	n.a	n.a	n.a	0	0	0	0
AT4G32460.4;AT4G32460.3;AT4G32460.2;AT4G32460.1	AT4G32460	5	2	2	12	6.8	6.8	35.293	0.0092231	1.9128	38330000	12	4	-0.148022	-0.830693	-0.759007	0.682671	0.610985	1.29366	0.607805	0.615385	1.22319	HC	not assigned.unknown	FUNCTIONS IN: molecular_function unknown; INVOLVED IN: biological_process unknown; LOCATED IN: plant-type cell wall; EXPRESSED IN: 24 plant structures; EXPRESSED DURING: 15 growth stages; CONTAINS InterPro DOMAIN/s: Protein of unknown function DUF642 (InterPro:IPR006946), Galactose-binding like (InterPro:IPR008979); BEST Arabidopsis thaliana protein match is: unknown protein (TAIR:AT5G11420.1); H…	PF04862,PF04862	35	35	extracellular	EX	X	n.a	n.a	n.a	0	0	0	0
AT4G23650.1	AT4G23650	17	17	17	39.1	39.1	39.1	59.336	0	97.232	1849400000	25	43	-1.22061	-0.784049	-0.168461	-0.436561	-1.05215	-1.48871	0.375941	0.846154	1.22209	HC	signalling.calcium.calcium dependent protein kinases	Symbols: CDPK6, CPK3 | CDPK6 (CALCIUM-DEPENDENT PROTEIN KINASE 6); ATP binding / calcium ion binding / calmodulin-dependent protein kinase/ kinase/ protein kinase/ protein serine/threonine kinase | chr4:12324758-12327459 REVERSE	PF00069,PF13499,PF13499	30	30.3.1	plasma membrane	PM	X	n.a	n.a	n.a	0	0	0	0
AT5G57350.4;AT5G57350.2;AT5G57350.1;AT5G57350.3	AT5G57350	26	9	7	28.8	13.1	10.5	104.45	0	88.795	743100000	49	41	-0.610631	-1.19753	-1.3023	0.586898	0.691666	1.27856	0.606547	0.615385	1.22193	HC	transport.p- and v-ATPases.H+-exporting ATPase	Symbols: AHA3, ATAHA3 | AHA3; ATPase/ hydrogen-exporting ATPase, phosphorylative mechanism | chr5:23230879-23236572 REVERSE	PF00122,PF00702,PF00690	34	34.1.10	plasma membrane	PM	X	n.a	n.a	n.a	0	0	0	0
AT3G16520.3;AT3G16520.2;AT3G16520.1	AT3G16520	10	10	10	31.2	31.2	31.2	51.204	0	123.79	1113800000	18	26	-0.726191	NaN	0.0756048	3	-0.801796	2.1982	0.683184	0.538462	1.22165	HC	misc.UDP glucosyl and glucoronyl transferases	Symbols: UGT88A1 | UDP-glucoronosyl/UDP-glucosyl transferase family protein | chr3:5619128-5620873 REVERSE	PF00201	26	26.2	cytosol	C	X	n.a	n.a	n.a	0	0	0	0
AT3G23570.3;AT3G23570.2;AT3G23570.1	AT3G23570	11	11	11	74.9	74.9	74.9	26.53	0	97.78	3598000000	14	68	-0.7541	NaN	0.0484979	3	-0.802598	2.1974	0.683117	0.538462	1.22158	HC	misc.misc2	dienelactone hydrolase family protein | chr3:8457778-8459691 REVERSE	PF01738	26	26.1	cytosol	C	X	n.a	n.a	n.a	0	0	0	0
AT1G49750.1	AT1G49750	20	20	20	40.7	40.7	40.7	54.407	0	323.31	22845000000	20	249	1.53337	0.360957	1.43279	1.17242	0.100586	1.273	0.606084	0.615385	1.22147	HC	not assigned.no ontology	leucine-rich repeat family protein | chr1:18410929-18412801 REVERSE	#N/A	35	35	extracellular	EX	X	n.a	n.a	n.a	0	0	0	0
AT2G28790.1;AT2G28790.2	AT2G28790	10	10	10	55	55	55	27.017	0	117.82	38579000000	12	189	1.03123	0.41873	0.390192	0.612503	0.641041	1.25354	0.604462	0.615385	1.21985	HC	stress.abiotic	osmotin-like protein, putative | chr2:12354430-12355431 REVERSE	PF00314	20	20.2	extracellular	EX	X	n.a	n.a	n.a	0	0	0	0
AT1G71880.1	AT1G71880	5	5	5	10.3	10.3	10.3	54.858	0	11.62	84328000	18	16	-0.600923	-1.07409	-1.37783	0.47317	0.776903	1.25007	0.604173	0.615385	1.21956	HC	transport.sugars.sucrose	Symbols: SUC1, ATSUC1 | SUC1 (Sucrose-proton symporter 1); carbohydrate transmembrane transporter/ sucrose:hydrogen symporter/ sugar:hydrogen symporter | chr1:27054180-27056341 FORWARD	PF13347	34	34.2	plasma membrane	PM	X	n.a	n.a	n.a	0	0	0	0
AT3G61140.1	AT3G61140	8	8	8	19.3	19.3	19.3	50.578	0	55.103	595590000	21	18	-0.978099	NaN	-0.146971	3	-0.831127	2.16887	0.680739	0.538462	1.2192	HC	signalling.light.COP9 signalosome	Symbols: FUS6, ATFUS6, CSN1, COP11, EMB78, ATSK31, SK31 | FUS6 (FUSCA 6) | chr3:22626262-22630117 FORWARD	PF10602,PF01399	30	30.11	cytosol,nucleus	C,N	X	n.a	n.a	n.a	0	0	0	0
AT1G01900.1	AT1G01900	17	17	17	29.5	29.5	29.5	83.246	0	162.27	1296900000	31	70	0.00269416	-0.489057	-0.749448	0.491751	0.752142	1.24389	0.603658	0.615385	1.21904	HC	protein.degradation.subtilases	Symbols: ATSBT1.1, SBTI1.1 | SBTI1.1; serine-type endopeptidase | chr1:310316-313130 FORWARD	PF00082,PF02225,PF05922,PF17766	29	29.5.1	extracellular	EX	X	n.a	n.a	n.a	0	0	0	0
AT3G21770.1	AT3G21770	17	17	16	50.2	50.2	47.4	35.788	0	215.93	10480000000	20	100	0.655665	0.215701	-0.146472	0.439964	0.802137	1.2421	0.603508	0.615385	1.21889	HC	misc.peroxidases	peroxidase 30 (PER30) (P30) (PRXR9) | chr3:7673276-7674839 FORWARD	PF00141	26	26.12	extracellular	EX	X	n.a	n.a	n.a	0	0	0	0
AT5G58090.1	AT5G58090	8	8	8	19.7	19.7	19.7	52.211	0	24.618	911170000	21	25	-0.878952	-0.137299	-0.0792534	-0.741653	-0.799698	-1.54135	0.371554	0.846154	1.21771	HC	misc.beta 1,3 glucan hydrolases.glucan endo-1,3-beta-glucosidase	glycosyl hydrolase family 17 protein | chr5:23505366-23507288 REVERSE	PF00332,PF07983	26	26.4	plasma membrane	PM	Likely PD protein	n.a	n.a	n.a	0	0	0	0
AT4G10120.3;AT4G10120.2;AT4G10120.1;AT4G10120.5;AT4G10120.4	AT4G10120	6	4	4	9.4	8	8	118.88	0	69.357	143530000	60	11	-0.866116	-1.55164	-1.40796	0.685523	0.541842	1.22736	0.60228	0.615385	1.21766	HC	major CHO metabolism.synthesis.sucrose.SPS	Symbols: ATSPS4F | ATSPS4F; sucrose-phosphate synthase/ transferase, transferring glycosyl groups | chr4:6314789-6319936 FORWARD	PF00534,PF05116,PF00862	2	2.1	plasma membrane,cytosol	PM,C	X	n.a	n.a	n.a	0	0	0	0
AT1G16610.4;AT1G16610.5;AT1G16610.7;AT1G16610.6;AT1G16610.2;AT1G16610.1;AT1G16610.3	AT1G16610	7	7	7	21	21	21	41.977	0	60.888	1583000000	19	55	0.212229	-0.83632	-0.874104	1.04855	1.08633	2.13488	0.677907	0.538462	1.21637	HC	misc.gluco-, galacto- and mannosidases	Symbols: SR45 | SR45; RNA binding / protein binding | chr1:5675704-5678780 REVERSE	PF00076	26	26.3	nucleus,plastid	N,P	X	n.a	n.a	n.a	0	0	0	0
AT5G40020.1	AT5G40020	6	6	6	27.3	27.3	27.3	28.094	0	18.459	301700000	14	20	-0.172534	-0.680648	-0.872694	0.508114	0.70016	1.20827	0.600689	0.615385	1.21607	HC	stress.biotic	pathogenesis-related thaumatin family protein | chr5:16022753-16024316 REVERSE	PF00314	20	20.1	extracellular	EX	X	n.a	n.a	n.a	0	0	0	0
AT1G01620.1	AT1G01620	15	10	8	52.1	39.9	23.1	30.632	0	148.97	6547400000	8	106	1.34984	0.533304	0.966215	0.816536	0.383626	1.20016	0.600013	0.615385	1.2154	HC	transport.Major Intrinsic Proteins.PIP	Symbols: PIP1C, TMP-B, PIP1;3 | PIP1C (PLASMA MEMBRANE INTRINSIC PROTEIN 1C); water channel | chr1:225665-227302 REVERSE	PF00230	34	34.19.1	plasma membrane	PM	X	n.a	n.a	n.a	0	0	0	0
AT2G38080.1	AT2G38080	12	12	12	21.7	21.7	21.7	61.526	0	83.094	1486400000	26	84	0.30855	-0.18442	-0.396615	0.49297	0.705165	1.19813	0.599845	0.615385	1.21523	HC	secondary metabolism.simple phenols	Symbols: IRX12, LAC4 | IRX12 (IRREGULAR XYLEM 12); laccase | chr2:15934460-15937616 FORWARD	PF07731,PF00394,PF07732	16	16.10	extracellular	EX	X	n.a	n.a	n.a	0	0	0	0
AT3G11200.1;AT3G11200.2	AT3G11200	6	6	6	22.4	22.4	22.4	27.832	0	39.253	513720000	8	42	0.189281	-0.419533	-0.398065	0.608814	0.587346	1.19616	0.59968	0.615385	1.21506	HC	RNA.regulation of transcription.Alfin-like	Symbols: AL2 | AL2 (ALFIN-LIKE 2); DNA binding / methylated histone residue binding | chr3:3508043-3510627 REVERSE	PF00628,PF12165	27	27.3	nucleus,endoplasmic reticulum,plasma membrane	N,ER,PM	X	n.a	n.a	n.a	0	0	0	0
AT3G25690.6;AT3G25690.4;AT3G25690.2;AT3G25690.1;AT3G25690.5;AT3G25690.3	AT3G25690	14	14	14	18.1	18.1	18.1	111.91	0	39.245	345690000	52	35	-0.508844	-0.758107	-1.44694	0.249263	0.938099	1.18736	0.598947	0.615385	1.21433	HC	not assigned.no ontology.hydroxyproline rich proteins	Symbols: CHUP1 | CHUP1 (CHLOROPLAST UNUSUAL POSITIONING 1) | chr3:9353834-9357899 FORWARD	#N/A	35	35	plastid,endoplasmic reticulum,vacuole	P,ER,V	X	n.a	n.a	n.a	0	0	0	0
AT5G62670.1;AT3G47950.2;AT3G47950.1	AT5G62670	26	14	12	25.9	17.3	14.2	105.12	0	167.06	1156300000	47	63	-0.504131	-0.786506	-1.40626	0.282376	0.902126	1.1845	0.598708	0.615385	1.21409	HC	transport.p- and v-ATPases	Symbols: AHA11 | AHA11 (Arabidopsis H(+)-ATPase 11); ATPase | chr5:25159230-25165209 FORWARD	PF00122,PF00690,PF00702	34	34.1.10	plasma membrane	PM	X	n.a	n.a	n.a	0	0	0	0
AT5G51550.1	AT5G51550	6	6	6	14.2	14.2	14.2	36.848	0	14.776	1182800000	11	29	0.166067	-0.138321	-0.712838	0.304388	0.878904	1.18329	0.598608	0.615385	1.21399	HC	not assigned.no ontology	Symbols: EXL3 | EXL3 (EXORDIUM LIKE 3) | chr5:20939494-20940895 REVERSE	PF04674	35	35	extracellular	EX	X	n.a	n.a	n.a	0	0	0	0
AT3G51430.2;AT3G51430.1	AT3G51430	8	8	7	23.8	23.8	19.5	41.455	0	26.428	525420000	20	22	-0.378844	-1.10786	-0.831954	0.72902	0.453111	1.18213	0.598511	0.615385	1.2139	HC	secondary metabolism.N misc.alkaloid-like	Symbols: YLS2 | YLS2; strictosidine synthase | chr3:19086465-19088110 FORWARD	PF03088	16	16.4	endoplasmic reticulum,extracellular	ER,EX	X	n.a	n.a	n.a	0	0	0	0
AT5G62740.1	AT5G62740	10	6	6	36	23.8	23.8	31.431	0	12.039	1248800000	19	25	0.348062	-0.45836	-0.0128237	0.806422	0.360886	1.16731	0.597276	0.615385	1.21266	HC	not assigned.no ontology	band 7 family protein | chr5:25200947-25202756 FORWARD	PF01145	35	35	plasma membrane	PM	X	n.a	n.a	n.a	0	0	0	0
AT3G10740.3;AT3G10740.1;AT3G10740.4;AT3G10740.2	AT3G10740	13	13	13	34.5	34.5	34.5	75.044	0	323.31	4736900000	30	107	-0.844196	-0.545358	0.489951	-0.298838	-1.33415	-1.63298	0.363918	0.846154	1.21007	HC	cell wall.degradation.mannan-xylose-arabinose-fucose	Symbols: ASD1, ARAF1, ARAF, ATASD1 | ASD1 (ALPHA-L-ARABINOFURANOSIDASE 1); alpha-N-arabinofuranosidase/ hydrolase, acting on glycosyl bonds / xylan 1,4-beta-xylosidase | chr3:3360888-3365414 REVERSE	PF06964	10	10.6	extracellular	EX	X	n.a	n.a	n.a	0	0	0	0
AT3G57010.1	AT3G57010	6	6	6	27.1	27.1	27.1	41.98	0	93.73	294810000	21	17	-0.402828	-1.16474	-0.774971	0.761911	0.372143	1.13405	0.594505	0.615385	1.20989	HC	secondary metabolism.N misc.alkaloid-like	strictosidine synthase family protein | chr3:21095654-21097451 REVERSE	PF03088	16	16.4	endoplasmic reticulum	ER	X	n.a	n.a	n.a	0	0	0	0
AT5G42570.1	AT5G42570	9	9	9	46.8	46.8	46.8	24.564	0	30.185	1186400000	12	47	0.426104	-0.0546511	-0.227126	0.480755	0.65323	1.13398	0.594499	0.615385	1.20988	HC	not assigned.no ontology	FUNCTIONS IN: molecular_function unknown; INVOLVED IN: intracellular protein transport; LOCATED IN: endoplasmic reticulum, plasma membrane; EXPRESSED IN: 26 plant structures; EXPRESSED DURING: 13 growth stages; CONTAINS InterPro DOMAIN/s: B-cell receptor-associated 31-like (InterPro:IPR008417); BEST Arabidopsis thaliana protein match is: unknown protein (TAIR:AT1G11905.1); Has 311 Blast hits to 2…	#N/A	35	35	endoplasmic reticulum	ER	X	n.a	n.a	n.a	0	0	0	0
AT2G04160.1	AT2G04160	18	18	18	38.2	38.2	38.2	82.873	0	241.25	2477400000	33	79	-0.168346	-0.865349	-0.599786	0.697003	0.43144	1.12844	0.594037	0.615385	1.20942	HC	protein.degradation.subtilases	Symbols: AIR3 | AIR3; serine-type endopeptidase | chr2:1401268-1407745 REVERSE	PF00082,PF05922,PF17766	29	29.5.1	extracellular	EX	Likely PD protein	n.a	n.a	n.a	0	0	0	0
AT5G51750.1	AT5G51750	25	25	25	43.6	43.6	43.6	84.949	0	134.71	2162600000	35	102	-0.189898	-0.537728	-0.97016	0.347831	0.780263	1.12809	0.594008	0.615385	1.20939	HC	protein.degradation.subtilases	Symbols: ATSBT1.3, SBT1.3 | ATSBT1.3 (ARABIDOPSIS THALIANA SUBTILASE 1.3); identical protein binding / serine-type endopeptidase | chr5:21020207-21022781 FORWARD	PF00082,PF02225,PF05922,PF17766	29	29.5.1	extracellular	EX	X	n.a	n.a	n.a	0	0	0	0
AT5G67130.1	AT5G67130	3	3	3	10.8	10.8	10.8	46.607	0	5.8052	110900000	22	3	-1.23282	-0.0586129	-0.763627	-1.17421	-0.469195	-1.6434	0.36305	0.846154	1.2092	HC	signalling.MAP kinases	phospholipase C/ phosphoric diester hydrolase | chr5:26791346-26793882 FORWARD	#N/A	30	30.6	plasma membrane	PM	X	n.a	n.a	n.a	0	0	0	0
AT3G61430.2;AT3G61430.1	AT3G61430	15	4	4	50.3	18.2	18.2	30.688	0	49.751	1384200000	8	33	0.0828932	-0.549485	-0.407665	0.632379	0.490558	1.12294	0.593578	0.615385	1.20896	HC	transport.Major Intrinsic Proteins.PIP	Symbols: PIP1A, ATPIP1, PIP1, PIP1;1 | PIP1A (PLASMA MEMBRANE INTRINSIC PROTEIN 1A); water channel | chr3:22733474-22735335 FORWARD	PF00230	34	34.19.1	plasma membrane	PM	X	n.a	n.a	n.a	0	0	0	0
AT5G57800.1	AT5G57800	5	5	5	12.5	12.5	12.5	72.288	0	19.541	98236000	29	11	-0.693597	-1.35539	-1.15437	0.661793	0.460776	1.12257	0.593547	0.615385	1.20893	HC	secondary metabolism.wax	Symbols: FLP1, YRE, CER3, WAX2 | CER3 (ECERIFERUM 3); binding / catalytic/ iron ion binding / oxidoreductase | chr5:23420209-23424052 FORWARD	PF04116,PF12076	16	16.7	plasma membrane	PM	X	n.a	n.a	n.a	0	0	0	0
AT2G27720.1;AT2G27720.3;AT2G27720.2;AT2G27720.4	AT2G27720	16	11	11	100	74.8	74.8	11.452	0	323.31	50419000000	5	451	1.94284	1.28936	1.4784	0.65348	0.46444	1.11792	0.59316	0.615385	1.20854	HC	protein.synthesis.ribosomal protein.eukaryotic.60S subunit.P2	60S acidic ribosomal protein P2 (RPP2A) | chr2:11818696-11819578 FORWARD	PF00428	29	29.2.1.2	cytosol,endoplasmic reticulum	C,ER	X	n.a	n.a	n.a	0	0	0	0
AT4G39640.1;AT4G39640.2	AT4G39640	19	19	19	38.6	38.6	38.6	61.189	0	78.714	2024800000	27	69	-0.0536369	-0.309722	-0.914955	0.256085	0.861318	1.1174	0.593117	0.615385	1.2085	HC	stress.abiotic	Symbols: GGT1 | GGT1 (GAMMA-GLUTAMYL TRANSPEPTIDASE 1); gamma-glutamyltransferase/ glutathione gamma-glutamylcysteinyltransferase | chr4:18399955-18402963 FORWARD	PF01019	20	20.2	extracellular	EX	X	n.a	n.a	n.a	0	0	0	0
AT1G16810.3;AT1G16810.2;AT1G16810.1	AT1G16810	3	3	3	31.9	31.9	31.9	16.382	0	5.4121	685340000	6	4	1.17955	NaN	-0.628367	3	1.80791	4.80791	0.900659	0.307692	1.20835	HC	not assigned.unknown	unknown protein | chr1:5755588-5756895 FORWARD	PF08555	35	35	nucleus,cytosol	N,C	X	n.a	n.a	n.a	0	0	0	0
AT4G20940.1	AT4G20940	4	4	4	6.9	6.9	6.9	112.04	0	29.666	155710000	42	8	-1.3599	0.240578	-1.30368	-1.60048	-0.0562188	-1.6567	0.361942	0.846154	1.2081	HC	signalling.receptor kinases.leucine rich repeat III	leucine-rich repeat family protein | chr4:11202728-11206280 FORWARD	PF07714,PF08263,PF13516,PF13516,PF13855,PF13855,PF13855	30	30.2	plasma membrane	PM	X	n.a	n.a	n.a	0	0	0	0
AT5G36890.2;AT5G36890.1	AT5G36890	7	7	7	23.4	23.4	23.4	55.763	0	86.575	3960500000	26	47	0.747864	-0.372583	-0.163535	1.12045	0.911399	2.03185	0.669321	0.538462	1.20778	HC	misc.gluco-, galacto- and mannosidases	Symbols: BGLU42 | BGLU42 (BETA GLUCOSIDASE 42); beta-glucosidase/ catalytic/ cation binding / hydrolase, hydrolyzing O-glycosyl compounds | chr5:14542026-14546230 REVERSE	PF00232	26	26.3	plastid,cytosol	P,C	X	n.a	n.a	n.a	0	0	0	0
AT2G45960.2;AT2G45960.1;AT2G45960.3	AT2G45960	16	16	6	59.9	59.9	29.9	29.132	0	323.31	43841000000	8	279	2.04918	1.08384	1.9387	0.965331	0.110471	1.0758	0.58965	0.615385	1.20503	HC	transport.Major Intrinsic Proteins.PIP	Symbols: PIP1B, TMP-A, ATHH2, PIP1;2 | PIP1B (NAMED PLASMA MEMBRANE INTRINSIC PROTEIN 1B); water channel | chr2:18910295-18911982 FORWARD	PF00230	34	34.19.1	plasma membrane	PM	X	n.a	n.a	n.a	0	0	0	0
AT3G02110.1	AT3G02110	16	16	16	37.8	37.8	37.8	53.4	0	92.359	1910400000	25	60	-0.252021	-0.656232	-0.921736	0.404212	0.669716	1.07393	0.589494	0.615385	1.20488	HC	protein.degradation.serine protease	Symbols: scpl25 | scpl25 (serine carboxypeptidase-like 25); serine-type carboxypeptidase | chr3:370762-373722 REVERSE	PF00450	29	29.5.5	extracellular	EX	X	n.a	n.a	n.a	0	0	0	0
AT1G09870.1	AT1G09870	6	6	6	17.9	17.9	17.9	54.854	0	23.601	378810000	24	19	-1.28334	-0.26018	-0.611102	-1.02316	-0.672242	-1.69541	0.358716	0.846154	1.20487	HC	misc.acid and other phosphatases	histidine acid phosphatase family protein | chr1:3205741-3208598 FORWARD	PF00328	26	26.13	endoplasmic reticulum	ER	X	n.a	n.a	n.a	0	0	0	0
AT4G14710.6;AT4G14710.4;AT4G14710.2;AT4G14710.1;AT4G14710.3;AT4G14710.5;AT4G14716.2;AT4G14716.1	AT4G14710	9	9	9	42.3	42.3	42.3	21.365	0	43.158	1943500000	14	43	-0.439503	NaN	0.564447	3	-1.00395	1.99605	0.666337	0.538462	1.2048	HC	metal handling.regulation	Symbols: ATARD2 | acireductone dioxygenase [iron(II)-requiring]/ metal ion binding | chr4:8424667-8426558 REVERSE	PF03079	15	15.3	cytosol	C	X	n.a	n.a	n.a	0	0	0	0
AT2G36850.1	AT2G36850	12	9	9	9.4	7.2	7.2	218.38	0	26.519	347120000	96	22	-1.30921	-1.62606	-2.06149	0.31685	0.752276	1.06913	0.589094	0.615385	1.20448	HC	minor CHO metabolism.callose	Symbols: ATGSL08, GSL8, GSL08, ATGSL8 | GSL8 (GLUCAN SYNTHASE-LIKE 8); 1,3-beta-glucan synthase/ transferase, transferring glycosyl groups | chr2:15454697-15469666 REVERSE	PF02364,PF14288	3	3.6	plasma membrane	PM	Likely PD protein	n.a	n.a	n.a	0	0	0	0
AT2G39770.3;AT2G39770.2;AT2G39770.1	AT2G39770	10	10	6	38.2	38.2	25.2	39.577	0	156.56	2978800000	16	56	-0.468352	NaN	0.539878	3	-1.00823	1.99177	0.665981	0.538462	1.20444	HC	cell wall.precursor synthesis.NDP sugar pyrophosphorylase.GDP mannose	Symbols: CYT1, VTC1, SOZ1, EMB101, GMP1 | CYT1 (CYTOKINESIS DEFECTIVE 1); mannose-1-phosphate guanylyltransferase/ nucleotidyltransferase | chr2:16588702-16590985 FORWARD	PF00483,PF00132	10	10.1	cytosol,mitochondrion	C,M	X	n.a	n.a	n.a	0	0	0	0
AT2G28470.5;AT2G28470.4;AT2G28470.2;AT2G28470.3;AT2G28470.1	AT2G28470	11	10	10	25.1	24.1	24.1	77.06	0	144.45	1363800000	32	46	-1.17007	-0.449449	-0.189144	-0.720622	-0.980926	-1.70155	0.358204	0.846154	1.20436	HC	misc.gluco-, galacto- and mannosidases.beta-galactosidase	Symbols: BGAL8 | BGAL8 (beta-galactosidase 8); beta-galactosidase/ catalytic/ cation binding / sugar binding | chr2:12168840-12173570 REVERSE	PF01301,PF17834,PF02140	26	26.3	extracellular	EX	X	n.a	n.a	n.a	0	0	0	0
AT1G27770.4;AT1G27770.1;AT1G27770.2;AT1G27770.3	AT1G27770	3	3	3	3.7	3.7	3.7	111.26	0	7.803	52187000	39	3	-1.01614	-1.2315	-1.83659	0.215359	0.820446	1.0358	0.586317	0.615385	1.2017	HC	transport.calcium	Symbols: ACA1, PEA1 | ACA1 (AUTO-INHIBITED CA2+-ATPASE 1); calcium channel/ calcium-transporting ATPase/ calmodulin binding | chr1:9671638-9676157 REVERSE	PF00122,PF00689,PF00690,PF12515,PF13246	34	34.21	endoplasmic reticulum,plastid	ER,P	X	n.a	n.a	n.a	0	0	0	0
AT3G44330.1	AT3G44330	18	18	18	40	40	40	62.202	0	159.82	1609800000	28	75	0.0162971	-0.561331	-0.44163	0.577628	0.457927	1.03556	0.586296	0.615385	1.20168	HC	not assigned.unknown	INVOLVED IN: protein processing; LOCATED IN: mitochondrion, endoplasmic reticulum, plasma membrane, vacuole; EXPRESSED IN: 25 plant structures; EXPRESSED DURING: 13 growth stages; CONTAINS InterPro DOMAIN/s: Nicalin (InterPro:IPR016574), EF-HAND 1 (InterPro:IPR018247), Nicastrin (InterPro:IPR008710); Has 192 Blast hits to 192 proteins in 79 species: Archae - 6; Bacteria - 5; Metazoa - 124; Fungi …	PF05450	35	35	endoplasmic reticulum	ER	X	n.a	n.a	n.a	0	0	0	0
AT1G53500.1	AT1G53500	19	11	7	42.4	27	19.8	75.225	0	37.412	1854000000	38	38	-1.01989	NaN	0.0245955	3	-1.04449	1.95551	0.662959	0.538462	1.20142	HC	cell wall.precursor synthesis.UDP-glucose 4,6-dehydratase	Symbols: MUM4, RHM2, ATRHM2, ATMUM4 | MUM4 (MUCILAGE-MODIFIED 4); UDP-4-keto-6-deoxy-glucose-3,5-epimerase/ UDP-4-keto-rhamnose-4-keto-reductase/ UDP-L-rhamnose synthase/ UDP-glucose 4,6-dehydratase/ catalytic | chr1:19966944-19969757 REVERSE	PF04321,PF16363	10	10.1	cytosol	C	X	n.a	n.a	n.a	0	0	0	0
AT5G13980.1;AT5G13980.2;AT5G13980.3	AT5G13980	36	36	36	40.2	40.2	40.2	115.9	0	293.54	11001000000	46	236	-0.40582	0.261763	0.669378	-0.667583	-1.0752	-1.74278	0.354768	0.846154	1.20092	HC	misc.gluco-, galacto- and mannosidases.alpha-mannosidase	glycosyl hydrolase family 38 protein | chr5:4508496-4514425 FORWARD	PF01074,PF07748,PF09261,PF17677	26	26.3	extracellular,vacuole	EX,V	X	n.a	n.a	n.a	0	0	0	0
AT3G49120.1	AT3G49120	20	20	10	55.5	55.5	33.7	38.832	0	323.31	59037000000	18	282	0.834283	1.27079	2.14748	-0.43651	-1.3132	-1.74971	0.354191	0.846154	1.20034	HC	misc.peroxidases	Symbols: ATPERX34, PERX34, PRXCB, ATPCB | PRXCB (PEROXIDASE CB); peroxidase | chr3:18207651-18210132 FORWARD	PF00141	26	26.12	extracellular	EX	X	n.a	n.a	n.a	0	0	0	0
AT4G27520.1	AT4G27520	9	9	9	26.6	26.6	26.6	35.064	0	132.14	5079800000	14	94	-0.0858981	0.467057	1.11191	-0.552955	-1.19781	-1.75077	0.354103	0.846154	1.20026	HC	misc.plastocyanin-like	plastocyanin-like domain-containing protein | chr4:13750440-13751905 REVERSE	PF02298	26	26.19	plasma membrane	PM	X	n.a	n.a	n.a	0	0	0	0
AT2G33530.1	AT2G33530	8	8	8	23.4	23.4	23.4	51.883	0	40.004	1554500000	21	44	0.212157	-0.362464	-0.226453	0.574621	0.43861	1.01323	0.584436	0.615385	1.19982	HC	protein.degradation.serine protease	Symbols: scpl46 | scpl46 (serine carboxypeptidase-like 46); serine-type carboxypeptidase | chr2:14197646-14200560 REVERSE	PF00450	29	29.5.5	extracellular	EX	X	n.a	n.a	n.a	0	0	0	0
AT5G35180.3;AT5G35180.2;AT5G35180.1;AT5G35180.5;AT5G35180.4	AT5G35180	6	6	6	14.2	14.2	14.2	66.732	0	21.523	140170000	30	21	-0.797073	-1.10196	-1.497	0.304885	0.699932	1.00482	0.583735	0.615385	1.19912	HC	not assigned.unknown	phosphoinositide binding | chr5:13424418-13433018 FORWARD	PF07059,PF01852	35	35	plasma membrane,cytosol,nucleus	PM,C,N	X	n.a	n.a	n.a	0	0	0	0
AT1G35620.1	AT1G35620	12	12	12	44.5	44.5	44.5	49.85	0	133.04	1164700000	16	37	-0.290578	-1.07164	-0.509668	0.78106	0.21909	1.00015	0.583346	0.615385	1.19873	HC	redox.thioredoxin.PDIL	Symbols: ATPDIL5-2, ATPDI8, PDI8 | ATPDIL5-2 (PDI-LIKE 5-2); protein disulfide isomerase | chr1:13156368-13158467 FORWARD	PF00085,PF13848	21	21.1	endoplasmic reticulum	ER	X	n.a	n.a	n.a	0	0	0	0
AT3G16530.1	AT3G16530	12	8	8	57.2	39.1	39.1	30.509	0	106.42	4088300000	13	50	-0.381664	0.136452	0.908826	-0.518116	-1.29049	-1.8086	0.349283	0.846154	1.19544	HC	misc.myrosinases-lectin-jacalin	legume lectin family protein | chr3:5624377-5625470 REVERSE	PF00139	26	26.16	extracellular	EX	X	n.a	n.a	n.a	0	0	0	0
AT5G55730.2;AT5G55730.1	AT5G55730	11	11	11	34.9	34.9	34.9	44.849	0	124.79	3309000000	17	64	-0.458195	0.312438	0.595893	-0.770633	-1.05409	-1.82472	0.34794	0.846154	1.19409	HC	cell wall.cell wall proteins.AGPs.AGP	Symbols: FLA1 | FLA1 (FASCICLIN-LIKE ARAB INOGALACTAN 1) | chr5:22558148-22560461 REVERSE	PF02469,PF02469	10	10.5	extracellular	EX	X	n.a	n.a	n.a	0	0	0	0
AT4G30220.1;AT4G30220.2	AT4G30220	5	5	5	44.3	44.3	44.3	9.8641	0	21.934	1257200000	4	29	1.08818	0.517069	0.722593	0.571109	0.365585	0.936694	0.578058	0.615385	1.19344	HC	RNA.processing	Symbols: RUXF | RUXF (SMALL NUCLEAR RIBONUCLEOPROTEIN F) | chr4:14802950-14804323 REVERSE	PF01423	27	27.1	nucleus,plasma membrane	N,PM	X	n.a	n.a	n.a	0	0	0	0
AT5G16970.1	AT5G16970	12	12	6	52.2	52.2	27.2	38.133	0	99.664	3570400000	18	55	-0.489423	NaN	0.659247	3	-1.14867	1.85133	0.654277	0.538462	1.19274	HC	misc.oxidases - copper, flavone etc	Symbols: AT-AER | AT-AER (alkenal reductase); 2-alkenal reductase | chr5:5576168-5578075 REVERSE	PF00107,PF16884	26	26.7	cytosol	C	X	n.a	n.a	n.a	0	0	0	0
AT1G29670.1;AT1G29670.2	AT1G29670	21	21	21	76.3	76.3	76.3	39.871	0	323.31	11019000000	18	228	-0.00941548	0.415828	1.40919	-0.425244	-1.4186	-1.84385	0.346346	0.846154	1.1925	HC	misc.GDSL-motif lipase	GDSL-motif lipase/hydrolase family protein | chr1:10375763-10377871 FORWARD	PF00657	26	26.28	extracellular	EX	X	n.a	n.a	n.a	0	0	0	0
AT1G64330.1	AT1G64330	28	26	26	47.4	45.4	45.4	64.494	0	216.94	3498400000	30	124	0.33585	NaN	-1.27451	3	1.61036	4.61036	0.884197	0.307692	1.19189	HC	cell.organisation	myosin heavy chain-related | chr1:23870905-23874198 FORWARD	PF07765	31	31.1	vacuole	V	X	n.a	n.a	n.a	0	0	0	0
AT1G08980.1	AT1G08980	9	9	9	35.8	35.8	35.8	45.056	0	48.63	1323000000	19	36	-0.958818	NaN	0.203992	3	-1.16281	1.83719	0.653099	0.538462	1.19156	HC	misc.nitrilases, *nitrile lyases, berberine bridge enzymes, reticuline oxidases, troponine reductases	Symbols: ATAMI1, AMI1, ATTOC64-I | AMI1 (AMIDASE 1); amidase/ hydrolase, acting on carbon-nitrogen (but not peptide) bonds / indoleacetamide hydrolase | chr1:2884411-2886620 FORWARD	PF01425,PF01425	26	26.8	cytosol	C	X	n.a	n.a	n.a	0	0	0	0
AT3G52500.1	AT3G52500	17	17	17	36.2	36.2	36.2	51.004	0	196.57	12399000000	23	226	1.40284	0.84539	1.04786	0.557453	0.354981	0.912434	0.576036	0.615385	1.19142	HC	protein.degradation	aspartyl protease family protein | chr3:19465499-19467386 REVERSE	PF14541,PF14543	29	29.5	extracellular	EX	X	n.a	n.a	n.a	0	0	0	0
AT1G47550.2;AT1G47550.1;AT1G47560.1	AT1G47550	8	8	8	12.5	12.5	12.5	100.16	0	37.915	473180000	42	28	-1.03381	-1.52057	-1.45472	0.486754	0.420905	0.907659	0.575638	0.615385	1.19102	HC	not assigned.unknown	unknown protein | chr1:17457171-17463896 FORWARD	PF15277,PF09763,PF09763	35	35	plasma membrane,cytosol	PM,C	X	n.a	n.a	n.a	0	0	0	0
AT3G19820.3;AT3G19820.2;AT3G19820.1	AT3G19820	26	26	26	49.2	49.2	49.2	65.393	0	120.98	5383300000	30	176	0.338923	-0.101004	-0.125224	0.439926	0.464146	0.904072	0.575339	0.615385	1.19072	HC	hormone metabolism.brassinosteroid.synthesis-degradation.sterols.DWF1	Symbols: DWF1, DIM, EVE1, DIM1, CBB1 | DWF1 (DWARF 1); calmodulin binding / catalytic | chr3:6879617-6881652 REVERSE	PF01565	17	17.3	endoplasmic reticulum,mitochondrion,peroxisome	ER,M,PX	X	n.a	n.a	n.a	0	0	0	0
AT3G50590.2;AT3G50590.1	AT3G50590	11	11	11	11.8	11.8	11.8	174.99	0	41.111	2735900000	79	43	-1.16018	-1.59753	-1.6265	0.437351	0.466314	0.903665	0.575305	0.615385	1.19069	HC	not assigned.no ontology	nucleotide binding | chr3:18771019-18779502 FORWARD	#N/A	35	35	nucleus,plasma membrane	N,PM	X	n.a	n.a	n.a	0	0	0	0
AT1G30360.1	AT1G30360	27	27	26	39	39	38	81.934	0	191.69	8982300000	40	260	0.52862	-0.266995	0.426464	0.795614	0.102155	0.897769	0.574814	0.615385	1.1902	HC	stress.abiotic.drought/salt	Symbols: ERD4 | ERD4 (early-responsive to dehydration 4) | chr1:10715665-10718997 FORWARD	PF13967,PF02714,PF14703	20	20.2	plasma membrane	PM	X	n.a	n.a	n.a	0	0	0	0
AT1G11260.1	AT1G11260	7	7	7	18.8	18.8	18.8	57.61	0	75.92	588020000	18	42	-0.0265357	-0.273588	-0.671224	0.247052	0.644688	0.89174	0.574312	0.615385	1.1897	HC	transport.sugars	Symbols: STP1, ATSTP1 | STP1 (SUGAR TRANSPORTER 1); carbohydrate transmembrane transporter/ sugar:hydrogen symporter | chr1:3777328-3780337 FORWARD	PF00083	34	34.2	plasma membrane	PM	X	n.a	n.a	n.a	0	0	0	0
AT4G04940.1;AT4G04940.2	AT4G04940	6	6	6	8.2	8.2	8.2	102.22	0	9.3642	48036000	51	10	-0.992798	NaN	-2.56317	3	1.57037	4.57037	0.880864	0.307692	1.18856	HC	protein.synthesis.ribosome biogenesis.Pre-rRNA processing and modifications.WD-repeat proteins	transducin family protein / WD-40 repeat family protein | chr4:2511028-2517193 REVERSE	PF12894,PF04192,PF00400	29	29.2	nucleus	N	X	n.a	n.a	n.a	0	0	0	0
AT4G27140.1	AT4G27140	4	4	4	26.2	26.2	26.2	19.014	0	17.301	1147600000	6	13	0.353234	-0.233109	0.0673163	0.586343	0.285918	0.872261	0.572688	0.615385	1.18807	HC	development.storage proteins	2S seed storage protein 1 / 2S albumin storage protein / NWMU1-2S albumin 1 | chr4:13607329-13608031 FORWARD	PF00234	33	33.1	extracellular	EX	X	n.a	n.a	n.a	0	0	0	0
AT2G45470.1	AT2G45470	14	14	11	44.5	44.5	41	43.074	0	321.65	13492000000	15	160	0.128698	0.545786	1.60986	-0.417088	-1.48116	-1.89825	0.341812	0.846154	1.18797	HC	cell wall.cell wall proteins.AGPs.AGP	Symbols: FLA8, AGP8 | FLA8 (FASCICLIN-LIKE ARABINOGALACTAN PROTEIN 8) | chr2:18742540-18744111 REVERSE	PF02469	10	10.5	extracellular,plasma membrane	EX,PM	X	n.a	n.a	n.a	0	0	0	0
AT2G05520.1;AT2G05520.5;AT2G05520.4;AT2G05520.3;AT2G05520.2;AT2G05520.6	AT2G05520	4	4	4	62.1	62.1	62.1	14.289	0	25.713	438280000	7	20	0.474928	0.162379	-0.0774899	0.312549	0.552418	0.864967	0.572081	0.615385	1.18747	HC	not assigned.no ontology.glycine rich proteins	Symbols: GRP-3, ATGRP-3, GRP3 | GRP-3 (GLYCINE-RICH PROTEIN 3) | chr2:2026162-2027099 FORWARD	PF07172	35	35	extracellular	EX	X	n.a	n.a	n.a	0	0	0	0
AT3G01780.1;AT3G01780.2	AT3G01780	22	22	22	23	23	23	130.91	0	122.56	741960000	63	53	-1.05612	-1.64904	-1.32503	0.59292	0.268911	0.861831	0.571819	0.615385	1.1872	HC	not assigned.unknown	Symbols: TPLATE | TPLATE; binding | chr3:279060-283580 FORWARD	#N/A	35	35	plasma membrane	PM	X	n.a	n.a	n.a	0	0	0	0
AT2G24420.2;AT2G24420.1	AT2G24420	17	17	17	30.2	30.2	30.2	50.351	0	63.86	1966800000	19	77	0.148456	-0.573824	0.0301624	0.722281	0.118294	0.840575	0.570048	0.615385	1.18543	HC	DNA.repair	DNA repair ATPase-related | chr2:10380026-10383405 FORWARD	#N/A	28	28.2	endoplasmic reticulum	ER	X	n.a	n.a	n.a	0	0	0	0
AT1G70770.2;AT1G70770.1	AT1G70770	21	21	21	42.1	42.1	42.1	66.864	0	181.95	4328200000	32	148	0.378318	-0.0029919	-0.0512981	0.38131	0.429616	0.810926	0.567577	0.615385	1.18296	HC	not assigned.unknown	unknown protein | chr1:26688230-26691277 REVERSE	PF10151	35	35	endoplasmic reticulum,cytosol	ER,C	X	n.a	n.a	n.a	0	0	0	0
AT2G39010.1;AT2G39010.2	AT2G39010	5	5	5	27.3	27.3	27.3	31.05	0	71.891	1637500000	8	50	0.665686	0.0917455	0.457203	0.57394	0.208483	0.782423	0.565202	0.615385	1.18059	HC	transport.Major Intrinsic Proteins.PIP	Symbols: PIP2E, PIP2;6 | PIP2E (PLASMA MEMBRANE INTRINSIC PROTEIN 2E); water channel | chr2:16291477-16294034 FORWARD	PF00230	34	34.19.1	plasma membrane	PM	X	n.a	n.a	n.a	0	0	0	0
AT5G63530.2;AT5G63530.1	AT5G63530	13	13	13	36.8	36.8	36.8	37.563	0	46.082	713520000	15	44	0.0996524	-0.679909	-0.820825	0.779561	0.920478	1.70004	0.64167	0.538462	1.18013	HC	metal handling.binding, chelation and storage	Symbols: ATFP3, FP3 | ATFP3; metal ion binding / transition metal ion binding | chr5:25433154-25435834 FORWARD	PF00403,PF00403	15	15.2	nucleus	N	Likely PD protein	n.a	n.a	n.a	0	0	0	0
AT1G79500.4;AT1G79500.3;AT1G79500.2;AT1G79500.1	AT1G79500	9	9	4	39.7	39.7	19	31.656	0	37.552	1437900000	15	33	-0.895858	NaN	0.414705	3	-1.31056	1.68944	0.640786	0.538462	1.17925	HC	cell wall.precursor synthesis.KDO pathway.KDO-8-Phosphate Synthase	2-dehydro-3-deoxyphosphooctonate aldolase / phospho-2-dehydro-3-deoxyoctonate aldolase / 3-deoxy-D-manno-octulosonic acid 8-phosphate synthetase (KDSA) | chr1:29903420-29909437 FORWARD	PF00793	10	10.1	cytosol	C	X	n.a	n.a	n.a	0	0	0	0
AT1G01300.1	AT1G01300	15	15	15	36.9	36.9	36.9	52.175	0	53.651	1683300000	25	55	-0.138864	-0.922247	-0.120835	0.783383	-0.0180287	0.765354	0.56378	0.615385	1.17916	HC	protein.degradation.aspartate protease	aspartyl protease family protein | chr1:116943-118764 FORWARD	PF14541,PF14543	29	29.5.4	extracellular	EX	X	n.a	n.a	n.a	0	0	0	0
AT5G24780.1	AT5G24780	14	6	6	34.4	18.5	18.5	30.261	0	68.14	22112000000	10	116	1.72503	0.922777	1.76351	0.802254	-0.038476	0.763778	0.563648	0.615385	1.17903	HC	development.storage proteins	Symbols: VSP1, ATVSP1 | VSP1 (VEGETATIVE STORAGE PROTEIN 1); acid phosphatase/ transcription factor binding | chr5:8507590-8508957 REVERSE	PF03767	33	33.1	extracellular	EX	X	n.a	n.a	n.a	0	0	0	0
AT3G20820.1	AT3G20820	25	25	25	67.7	67.7	67.7	39.862	0	323.31	56264000000	20	447	1.94316	1.72873	1.39892	0.214432	0.544245	0.758677	0.563223	0.615385	1.17861	HC	not assigned.no ontology	leucine-rich repeat family protein | chr3:7280878-7282177 FORWARD	PF13855,PF13855,PF08263	35	35	extracellular	EX	X	n.a	n.a	n.a	0	0	0	0
AT5G16550.1	AT5G16550	4	4	4	18.5	18.5	18.5	26.624	0	45.762	265510000	9	14	-0.12997	-0.559231	-0.447398	0.429261	0.317428	0.746689	0.562224	0.615385	1.17761	HC	not assigned.unknown	unknown protein | chr5:5405350-5406887 FORWARD	#N/A	35	35	endoplasmic reticulum	ER	X	n.a	n.a	n.a	0	0	0	0
AT4G09960.2;AT4G09960.1;AT4G09960.6;AT4G09960.5;AT4G09960.3;AT4G09960.4	AT4G09960	3	3	3	16.2	16.2	16.2	24.509	0	23.432	55475000	9	11	0.971947	-0.46103	NaN	1.43298	3	4.43298	0.869415	0.307692	1.17711	HC	RNA.regulation of transcription.MADS box transcription factor family	Symbols: STK, AGL11 | STK (SEEDSTICK); protein binding / transcription factor | chr4:6236473-6240681 REVERSE	PF00319,PF01486	27	27.3	nucleus	N	X	n.a	n.a	n.a	0	0	0	0
AT5G21105.1;AT5G21105.3;AT5G21105.2	AT5G21105	17	17	16	36.1	36.1	34.7	65.838	0	154.32	4140600000	20	90	0.436713	0.162102	-0.0291171	0.274611	0.46583	0.740442	0.561703	0.615385	1.17709	HC	redox.ascorbate and glutathione.ascorbate	L-ascorbate oxidase/ copper ion binding / oxidoreductase | chr5:7172687-7177841 FORWARD	PF00394,PF07731,PF07732	21	21.2	extracellular,cytosol	EX,C	Likely PD protein	n.a	n.a	n.a	0	0	0	0
AT2G36580.1	AT2G36580	25	8	8	61.7	25	25	57.508	0	107.39	3103000000	31	67	-0.302633	-0.528662	-0.808384	0.226029	0.505751	0.73178	0.560982	0.615385	1.17637	HC	glycolysis.cytosolic branch.pyruvate kinase (PK)	pyruvate kinase, putative | chr2:15339122-15343086 FORWARD	PF00224,PF02887	4	4.1	cytosol,plasma membrane	C,PM	X	n.a	n.a	n.a	0	0	0	0
AT3G19770.1;AT3G19770.2	AT3G19770	5	5	5	15	15	15	57.897	0	6.7582	1008800000	28	12	0.219179	NaN	-1.20187	3	1.42105	4.42105	0.868421	0.307692	1.17611	HC	protein.targeting.secretory pathway.vacuole	Symbols: ATVPS9A, VPS9A | VPS9A; Rho guanyl-nucleotide exchange factor | chr3:6866806-6869475 FORWARD	PF02204,PF18151	29	29.3.4	nucleus	N	X	n.a	n.a	n.a	0	0	0	0
AT3G01520.1	AT3G01520	9	9	7	42.3	42.3	35.4	19.568	0	17.208	2405900000	13	47	0.0175791	-0.940014	0.25232	0.957593	-0.234741	0.722852	0.560238	0.615385	1.17562	HC	stress.abiotic.unspecified	universal stress protein (USP) family protein | chr3:208439-210137 FORWARD	PF00582	20	20.2	cytosol,plasma membrane	C,PM	X	n.a	n.a	n.a	0	0	0	0
AT3G48710.1	AT3G48710	4	4	4	9.5	9.5	9.5	52.067	0	32.545	547980000	22	17	-0.054901	NaN	-1.46527	3	1.41037	4.41037	0.86753	0.307692	1.17522	HC	not assigned.unknown	EXPRESSED IN: 22 plant structures; EXPRESSED DURING: 13 growth stages; CONTAINS InterPro DOMAIN/s: DEK, C-terminal (InterPro:IPR014876); BEST Arabidopsis thaliana protein match is: unknown protein (TAIR:AT5G63550.2); Has 48226 Blast hits to 25734 proteins in 1103 species: Archae - 54; Bacteria - 6881; Metazoa - 21026; Fungi - 4604; Plants - 1514; Viruses - 306; Other Eukaryotes - 13841 (source: N…	PF08766	35	35	nucleus	N	X	n.a	n.a	n.a	0	0	0	0
AT1G79830.3;AT1G79830.2;AT1G79830.1;AT1G79830.5;AT1G79830.4	AT1G79830	7	7	7	7.4	7.4	7.4	108.35	0	15.647	122780000	64	12	-0.912697	NaN	-2.31241	3	1.39972	4.39972	0.866643	0.307692	1.17434	HC	cell.vesicle transport	Symbols: GC5 | GC5 (golgin candidate 5); protein binding | chr1:30027860-30033794 REVERSE	PF12325,PF12329	31	31.4	golgi	G	X	n.a	n.a	n.a	0	0	0	0
AT3G01680.1	AT3G01680	34	34	34	47.8	47.8	47.8	85.269	0	323.31	7463500000	38	187	0.18174	-1.00272	0.662785	1.18446	-0.481046	0.703416	0.558618	0.615385	1.174	HC	not assigned.unknown	unknown protein | chr3:251981-255513 FORWARD	PF14576,PF14577	35	35	endoplasmic reticulum	ER	X	n.a	n.a	n.a	0	0	0	0
AT4G27500.1;AT4G27500.2	AT4G27500	23	23	23	35.8	35.8	35.8	68.878	0	91.408	2451800000	31	101	-0.238467	-1.0051	-0.17272	0.766634	-0.0657472	0.700887	0.558407	0.615385	1.17379	HC	not assigned.unknown	Symbols: PPI1 | PPI1 (PROTON PUMP INTERACTOR 1); protein binding | chr4:13743110-13746211 FORWARD	#N/A	35	35	endoplasmic reticulum,plasma membrane	ER,PM	X	n.a	n.a	n.a	0	0	0	0
AT5G44130.1	AT5G44130	8	8	7	28.7	28.7	28.7	26.205	0	74.153	5315800000	12	65	-0.343433	0.282174	1.11564	-0.625607	-1.45907	-2.08468	0.326277	0.846154	1.17243	HC	cell wall.cell wall proteins.AGPs.AGP	Symbols: FLA13 | FLA13 (FASCICLIN-LIKE ARABINOGALACTAN PROTEIN 13 PRECURSOR) | chr5:17761090-17762003 FORWARD	PF02469	10	10.5	extracellular,plasma membrane	EX,PM	X	n.a	n.a	n.a	0	0	0	0
AT3G19340.1	AT3G19340	4	4	4	12.9	12.9	12.9	56.787	0	20.233	218990000	23	12	-0.616458	-0.778329	-1.13376	0.16187	0.517298	0.679169	0.556597	0.615385	1.17198	HC	not assigned.unknown	LOCATED IN: plasma membrane; EXPRESSED IN: 26 plant structures; EXPRESSED DURING: 15 growth stages; BEST Arabidopsis thaliana protein match is: aminopeptidase (TAIR:AT5G13940.1); Has 143 Blast hits to 138 proteins in 46 species: Archae - 0; Bacteria - 59; Metazoa - 12; Fungi - 0; Plants - 51; Viruses - 0; Other Eukaryotes - 21 (source: NCBI BLink). | chr3:6701273-6704226 REVERSE	PF12576	35	35	plasma membrane	PM	X	n.a	n.a	n.a	0	0	0	0
AT5G28540.1	AT5G28540	51	4	4	63.2	9.6	9.6	73.628	0	318.18	7214300000	31	77	0.595613	-0.239927	0.762755	0.83554	-0.167143	0.668397	0.5557	0.615385	1.17108	HC	stress.abiotic.heat	Symbols: BIP1 | BIP1; ATP binding | chr5:10540460-10543375 REVERSE	PF00012	20	20.2	endoplasmic reticulum	ER	X	n.a	n.a	n.a	0	0	0	0
AT4G24190.2;AT4G24190.1	AT4G24190	63	63	61	65.1	65.1	62.6	94.148	0	323.31	49730000000	42	608	1.26227	0.362094	1.50545	0.900179	-0.243181	0.656997	0.55475	0.615385	1.17013	HC	stress.abiotic.heat	Symbols: SHD, HSP90.7 | SHD (SHEPHERD); ATP binding / unfolded protein binding | chr4:12551717-12555909 REVERSE	PF00183,PF02518	20	20.2	endoplasmic reticulum	ER	X	n.a	n.a	n.a	0	0	0	0
AT3G28300.1;AT3G28290.1	AT3G28300	18	18	18	47	47	47	42.954	0	323.31	4529800000	18	88	0.24585	-0.38963	0.229638	0.63548	0.016212	0.651692	0.554308	0.615385	1.16969	HC	not assigned.no ontology	Symbols: AT14A | AT14A | chr3:10565737-10567600 FORWARD	PF05055	35	35	plasma membrane	PM	X	n.a	n.a	n.a	0	0	0	0
AT3G09740.1	AT3G09740	10	10	10	38.3	38.3	38.3	29.983	0	23.556	736550000	15	41	0.0791689	-0.0751625	-0.416959	0.154331	0.496127	0.650459	0.554205	0.615385	1.16959	HC	cell.vesicle transport	Symbols: SYP71, ATSYP71 | SYP71 (SYNTAXIN OF PLANTS 71); protein transporter | chr3:2989431-2991661 FORWARD	PF05739	31	31.4	plasma membrane	PM	X	n.a	n.a	n.a	0	0	0	0
AT2G37340.1;AT2G37340.5;AT2G37340.3;AT2G37340.6;AT2G37340.4;AT2G37340.2	AT2G37340	11	11	10	33.8	33.8	30.7	32.893	0	64.943	913860000	11	47	0.540274	-0.800656	NaN	1.34093	3	4.34093	0.861744	0.307692	1.16944	HC	RNA.processing.splicing	Symbols: RSZ33, ATRSZ33 | RSZ33; nucleic acid binding / nucleotide binding / zinc ion binding | chr2:15670147-15672700 REVERSE	PF00076,PF00098,PF00098	27	27.1	nucleus	N	X	n.a	n.a	n.a	0	0	0	0
AT3G53420.2;AT3G53420.1	AT3G53420	10	10	6	45.3	45.3	25.4	30.474	0	192.08	23167000000	7	245	2.19478	1.91065	1.83724	0.284128	0.35754	0.641668	0.553472	0.615385	1.16886	HC	transport.Major Intrinsic Proteins.PIP	Symbols: PIP2A, PIP2, PIP2;1 | PIP2A (PLASMA MEMBRANE INTRINSIC PROTEIN 2A); water channel | chr3:19803655-19805713 REVERSE	PF00230	34	34.19.1	plasma membrane	PM	X	n.a	n.a	n.a	0	0	0	0
AT5G41600.1	AT5G41600	8	5	5	31.1	27.6	27.6	28.948	0	21.773	781610000	7	36	-0.108779	-0.475629	-0.375327	0.36685	0.266548	0.633399	0.552783	0.615385	1.16817	HC	not assigned.no ontology	Symbols: BTI3 | BTI3 (VIRB2-INTERACTING PROTEIN 3) | chr5:16636130-16637693 FORWARD	PF02453	35	35	endoplasmic reticulum	ER	X	n.a	n.a	n.a	0	0	0	0
AT5G08550.1	AT5G08550	6	6	6	13.2	13.2	13.2	100.77	0	21.247	84517000	45	9	-0.928289	NaN	-2.25262	3	1.32433	4.32433	0.860361	0.307692	1.16805	HC	not assigned.unknown	Symbols: ILP1 | ILP1 (increased level of polyploidy1-1D); translation repressor | chr5:2765642-2770282 REVERSE	PF07842	35	35	nucleus	N	X	n.a	n.a	n.a	0	0	0	0
AT5G12200.1	AT5G12200	14	14	14	35.8	35.8	35.8	57.991	0	83.173	1698500000	25	42	-0.177852	-0.519675	-0.467961	0.341823	0.290109	0.631932	0.552661	0.615385	1.16805	HC	nucleotide metabolism.degradation.pyrimidine.dihydropyrimidinase	dihydropyrimidinase / DHPase / dihydropyrimidine amidohydrolase / hydantoinase (PYD2) | chr5:3941528-3944811 REVERSE	PF01979	23	23.2	endoplasmic reticulum	ER	X	n.a	n.a	n.a	0	0	0	0
AT2G21160.1;AT2G21160.2	AT2G21160	4	4	4	16.7	16.7	16.7	28.167	0	30.996	1020900000	6	28	0.839709	0.480398	0.567177	0.359311	0.272532	0.631843	0.552654	0.615385	1.16804	HC	not assigned.no ontology	translocon-associated protein alpha (TRAP alpha) family protein | chr2:9068318-9070431 FORWARD	PF03896	35	35	endoplasmic reticulum	ER	X	n.a	n.a	n.a	0	0	0	0
AT3G62580.1	AT3G62580	2	2	2	9.9	9.9	9.9	23.581	0	8.5401	237960000	7	6	0.176989	-0.254079	-0.020853	0.431068	0.197842	0.62891	0.552409	0.615385	1.16779	HC	not assigned.unknown	FUNCTIONS IN: molecular_function unknown; INVOLVED IN: biological_process unknown; LOCATED IN: endomembrane system; EXPRESSED IN: 23 plant structures; EXPRESSED DURING: 13 growth stages; BEST Arabidopsis thaliana protein match is: late embryogenesis abundant domain-containing protein / LEA domain-containing protein (TAIR:AT1G72100.1); Has 237 Blast hits to 236 proteins in 85 species: Archae - 0; …	PF13664	35	35	endoplasmic reticulum	ER	X	n.a	n.a	n.a	0	0	0	0
AT2G46630.1	AT2G46630	14	14	14	38.8	38.8	38.8	43.246	0	30.711	1692300000	23	59	0.515766	0.287898	-0.807973	0.227868	1.32374	1.55161	0.629301	0.538462	1.16776	HC	cell wall.cell wall proteins.LRR	unknown protein | chr2:19145529-19146713 FORWARD	#N/A	10	10.5	nucleus	N	X	n.a	n.a	n.a	0	0	0	0
AT5G46630.1;AT5G46630.2	AT5G46630	7	7	7	18.3	18.3	18.3	49.322	0	16.701	565240000	24	33	-0.28121	-0.465224	-0.723772	0.184014	0.442562	0.626576	0.552215	0.615385	1.1676	HC	protein.targeting.secretory pathway.unspecified	clathrin adaptor complexes medium subunit family protein | chr5:18920438-18923445 FORWARD	PF00928	29	29.3.4	plasma membrane,cytosol	PM,C	X	n.a	n.a	n.a	0	0	0	0
AT4G21650.1	AT4G21650	44	44	35	58.5	58.5	53.9	81.479	0	323.31	294550000000	35	1240	2.45315	2.49682	1.78609	-0.0436704	0.66706	0.62339	0.551949	0.615385	1.16733	HC	protein.degradation.subtilases	subtilase family protein | chr4:11501198-11504678 REVERSE	PF17766,PF05922,PF00082	29	29.5.1	extracellular	EX	X	n.a	n.a	n.a	0	0	0	0
AT5G60640.1;AT5G60640.2;AT5G60640.3	AT5G60640	31	31	31	50.4	50.4	50.4	66.356	0	323.31	13730000000	35	205	0.200727	-0.893039	0.67384	1.09377	-0.473113	0.620653	0.551721	0.615385	1.16711	HC	redox.thioredoxin.PDIL	Symbols: ATPDIL1-4, PDI2, ATPDI2 | ATPDIL1-4 (PDI-LIKE 1-4); protein disulfide isomerase | chr5:24370959-24374038 REVERSE	PF00085,PF00085,PF13848	21	21.1	endoplasmic reticulum	ER	X	n.a	n.a	n.a	0	0	0	0
AT5G63550.1;AT5G63550.2	AT5G63550	10	10	10	21.5	21.5	21.5	59.427	0	104.84	1852800000	29	53	0.287854	NaN	-1.01498	3	1.30284	4.30284	0.85857	0.307692	1.16626	HC	not assigned.unknown	EXPRESSED IN: guard cell; CONTAINS InterPro DOMAIN/s: DEK, C-terminal (InterPro:IPR014876); BEST Arabidopsis thaliana protein match is: unknown protein (TAIR:AT3G48710.1). | chr5:25444672-25448172 FORWARD	PF08766	35	35	nucleus	N	X	n.a	n.a	n.a	0	0	0	0
AT1G72390.2;AT1G72390.1	AT1G72390	2	2	2	1.4	1.4	1.4	143.31	0.0027933	2.4824	1807900000	53	8	0.46832	NaN	-0.834298	3	1.30262	4.30262	0.858551	0.307692	1.16624	HC	not assigned.unknown	unknown protein | chr1:27245165-27251576 FORWARD	#N/A	35	35	nucleus	N	X	n.a	n.a	n.a	0	0	0	0
AT4G34260.1	AT4G34260	26	26	26	35.5	35.5	35.5	93.724	0	232.42	2213800000	45	114	-0.211965	-0.160585	-0.872804	-0.0513806	0.660839	0.609458	0.550788	0.615385	1.16617	HC	not assigned.unknown	Symbols: FUC95A | FUC95A; 1,2-alpha-L-fucosidase | chr4:16398028-16401810 FORWARD	PF14498	35	35	extracellular	EX	X	n.a	n.a	n.a	0	0	0	0
AT3G51850.1;AT3G51850.2;AT3G51850.3	AT3G51850	3	3	3	9.3	9.3	9.3	59.375	0	4.4597	22828000	28	3	-1.96698	-0.980112	-0.781939	-0.986872	-1.18504	-2.17192	0.319007	0.846154	1.16516	HC	signalling.calcium.calcium dependent protein kinases	Symbols: CPK13 | CPK13; ATP binding / calcium ion binding / calmodulin-dependent protein kinase/ kinase/ protein kinase/ protein serine/threonine kinase/ protein tyrosine kinase | chr3:19232467-19235889 FORWARD	PF00069,PF13499,PF13499	30	30.3.1	plasma membrane	PM	X	n.a	n.a	n.a	0	0	0	0
AT4G35230.1	AT4G35230	6	6	6	17.6	17.6	17.6	56.817	0	84.799	1061500000	27	61	-0.360969	-1.24435	-0.0726646	0.883385	-0.288305	0.59508	0.54959	0.615385	1.16497	HC	signalling.kinase.RLCK.brassinosteroid signalling kinase	Symbols: BSK1 | BSK1 (BR-SIGNALING KINASE 1); ATP binding / binding / kinase/ protein kinase/ protein tyrosine kinase | chr4:16755112-16758091 REVERSE	PF07714	30	30.30.2.1	plasma membrane	PM	X	n.a	n.a	n.a	0	0	0	0
AT5G14030.4;AT5G14030.3;AT5G14030.2;AT5G14030.1;AT5G14030.5	AT5G14030	3	3	3	30.3	30.3	30.3	21.104	0	51.172	2056500000	8	42	0.545847	-0.0853339	0.588696	0.631181	-0.0428497	0.588331	0.549028	0.615385	1.16441	HC	not assigned.no ontology	translocon-associated protein beta (TRAPB) family protein | chr5:4526784-4528615 FORWARD	PF05753	35	35	endoplasmic reticulum,extracellular	ER,EX	X	n.a	n.a	n.a	0	0	0	0
AT3G28720.1;AT3G28720.2	AT3G28720	2	2	2	8	8	8	76.473	0	11.854	155990000	33	10	-0.901316	-1.21658	-1.17428	0.315266	0.272959	0.588226	0.549019	0.615385	1.1644	HC	RNA.regulation of transcription.putative transcription regulator	unknown protein | chr3:10782276-10784447 FORWARD	#N/A	27	27.3	endoplasmic reticulum	ER	X	n.a	n.a	n.a	0	0	0	0
AT1G45201.3;AT1G45201.1;AT1G45201.2	AT1G45201	23	23	23	45	45	45	57.715	0	235.92	16948000000	28	174	0.577104	0.177744	0.395342	0.39936	0.181762	0.581122	0.548427	0.615385	1.16381	HC	lipid metabolism.lipid degradation.lipases.triacylglycerol lipase	Symbols: ATTLL1, TLL1 | TLL1 (TRIACYLGLYCEROL LIPASE-LIKE 1); triacylglycerol lipase | chr1:17123821-17128651 FORWARD	PF01764	11	11.9	golgi,endoplasmic reticulum	G,ER	X	n.a	n.a	n.a	0	0	0	0
AT3G62020.2;AT3G62020.1	AT3G62020	5	4	4	23.6	15.2	15.2	20.323	0	38.938	3322700000	9	45	1.21853	0.902964	0.959627	0.315569	0.258906	0.574474	0.547873	0.615385	1.16326	HC	stress.abiotic.unspecified	Symbols: GLP10 | GLP10 (GERMIN-LIKE PROTEIN 10); manganese ion binding / nutrient reservoir | chr3:22971358-22972268 REVERSE	PF00190	20	20.2	vacuole,extracellular	V,EX	X	n.a	n.a	n.a	0	0	0	0
AT2G32720.2;AT2G32720.1	AT2G32720	3	3	3	38.8	38.8	38.8	15.065	0	25.332	461030000	8	23	-0.0918045	-0.174605	-0.572511	0.0828009	0.480706	0.563507	0.546959	0.615385	1.16234	HC	redox.ascorbate and glutathione	Symbols: B5 #4, ATCB5-B, CB5-B | CB5-B (CYTOCHROME B5 ISOFORM B); heme binding | chr2:13876774-13878531 REVERSE	PF00173	21	21.2	endoplasmic reticulum	ER	X	n.a	n.a	n.a	0	0	0	0
AT5G06530.3;AT5G06530.2;AT5G06530.1;AT5G06530.4	AT5G06530	5	5	5	11	11	11	75.869	0	18.772	204840000	32	16	-0.683679	-1.07892	-0.83091	0.395237	0.147231	0.542468	0.545206	0.615385	1.16059	HC	transport.ABC transporters and multidrug resistance systems	ABC transporter family protein | chr5:1989747-1994824 REVERSE	PF00005,PF01061	34	34.16	plasma membrane	PM	X	n.a	n.a	n.a	0	0	0	0
AT2G07360.1;AT2G07360.2	AT2G07360	13	13	13	15.6	15.6	15.6	130.08	0	96.959	733670000	53	51	-1.04301	-1.33959	-1.28095	0.29658	0.237945	0.534525	0.544544	0.615385	1.15993	HC	not assigned.no ontology	SH3 domain-containing protein | chr2:3047306-3057183 REVERSE	#N/A	35	35	plasma membrane,plastid	PM,P	X	n.a	n.a	n.a	0	0	0	0
AT4G25210.1	AT4G25210	14	14	14	42.1	42.1	42.1	40.274	0	264.82	4569200000	18	105	0.773976	-0.829797	-1.83899	1.60377	2.61297	4.21674	0.851395	0.307692	1.15909	HC	RNA.regulation of transcription.GeBP like	transcription regulator | chr4:12918328-12919742 FORWARD	PF04504	27	27.3	nucleus	N	X	n.a	n.a	n.a	0	0	0	0
AT2G30490.1	AT2G30490	26	26	25	56.8	56.8	56.8	57.792	0	250.35	7128800000	27	160	0.164792	-0.26895	0.0803202	0.433742	0.0844721	0.518215	0.543185	0.615385	1.15857	HC	secondary metabolism.phenylpropanoids.lignin biosynthesis.C4H	Symbols: ATC4H, C4H, CYP73A5 | C4H (CINNAMATE-4-HYDROXYLASE); trans-cinnamate 4-monooxygenase | chr2:12993663-12995770 REVERSE	PF00067	16	16.2	endoplasmic reticulum	ER	X	n.a	n.a	n.a	0	0	0	0
AT3G08600.1	AT3G08600	7	7	7	19.9	19.9	19.9	34.732	0	18.744	780270000	16	24	-0.337612	0.430678	-1.62255	-0.768289	1.28494	0.51665	0.543054	0.615385	1.15844	HC	not assigned.unknown	unknown protein | chr3:2612394-2613823 FORWARD	PF06697	35	35	plasma membrane	PM	X	n.a	n.a	n.a	0	0	0	0
AT3G54670.1	AT3G54670	16	16	16	15.4	15.4	15.4	140.91	0	45.405	376200000	63	43	-0.438134	NaN	-1.64704	3	1.2089	4.2089	0.850742	0.307692	1.15843	HC	cell.division	Symbols: TTN8, SMC1, ATSMC1 | TTN8 (TITAN8); ATP binding / transporter | chr3:20235678-20243960 FORWARD	PF02463,PF06470	31	31.2	nucleus	N	X	n.a	n.a	n.a	0	0	0	0
AT5G60670.1	AT5G60670	10	3	3	71.7	22.9	22.9	17.843	0	41.804	908900000	9	19	0.788814	NaN	-0.40983	3	1.19864	4.19864	0.849887	0.307692	1.15758	HC	protein.synthesis.ribosomal protein.eukaryotic.60S subunit.L12	60S ribosomal protein L12 (RPL12C) | chr5:24380910-24381593 REVERSE	PF03946,PF00298	29	29.2.1.2	cytosol	C	X	n.a	n.a	n.a	0	0	0	0
AT1G52410.2;AT1G52410.1	AT1G52410	74	74	73	77.9	77.9	77.9	84.375	0	323.31	37007000000	47	555	0.326767	-1.28835	0.516635	1.61511	-0.189868	1.42525	0.618771	0.538462	1.15723	HC	signalling.calcium	Symbols: TSA1 | TSA1 (TSK-ASSOCIATING PROTEIN 1); calcium ion binding / protein binding | chr1:19520728-19525624 FORWARD	#N/A	30	30.3	cytosol,peroxisome,nucleus	C,PX,N	X	n.a	n.a	n.a	0	0	0	0
AT5G50460.1;AT4G24920.1	AT5G50460	4	4	4	49.3	49.3	49.3	7.7372	0	75.7	2005800000	3	29	1.5078	1.30993	1.20937	0.19787	0.298435	0.496305	0.541359	0.615385	1.15674	HC	protein.targeting.secretory pathway.unspecified	protein transport protein SEC61 gamma subunit, putative | chr5:20551437-20552566 REVERSE	PF00584	29	29.3.4	endoplasmic reticulum	ER	X	n.a	n.a	n.a	0	0	0	0
AT5G60460.2;AT5G60460.1	AT5G60460	4	4	4	62.4	62.4	62.4	10.865	0	18.294	210020000	6	6	0.760854	NaN	-0.419281	3	1.18014	4.18014	0.848345	0.307692	1.15604	HC	protein.targeting.secretory pathway.unspecified	sec61beta family protein | chr5:24317437-24317935 REVERSE	PF03911	29	29.3.4	golgi	G	Likely PD protein	n.a	n.a	n.a	0	0	0	0
AT3G62840.1;AT2G47640.4;AT2G47640.1;AT3G62840.2;AT2G47640.3;AT2G47640.2	AT3G62840	6	6	6	48.6	48.6	48.6	12.635	0	16.594	577190000	6	33	1.18216	NaN	0.00312127	3	1.17904	4.17904	0.848254	0.307692	1.15595	HC	RNA.processing	FUNCTIONS IN: molecular_function unknown; LOCATED IN: small nucleolar ribonucleoprotein complex, nucleus; EXPRESSED IN: 22 plant structures; EXPRESSED DURING: 13 growth stages; CONTAINS InterPro DOMAIN/s: Like-Sm ribonucleoprotein, core (InterPro:IPR001163), Like-Sm ribonucleoprotein, eukaryotic and archaea-type, core (InterPro:IPR006649), Like-Sm ribonucleoprotein-related, core (InterPro:IPR0109…	PF01423	27	27.1	nucleus	N	X	n.a	n.a	n.a	0	0	0	0
AT3G62360.2;AT3G62360.1	AT3G62360	18	18	18	17.5	17.5	17.5	129.47	0	64.762	1113300000	55	40	-0.738041	-1.25136	-0.698885	0.513319	-0.0391556	0.474163	0.539514	0.615385	1.1549	HC	not assigned.unknown	carbohydrate binding | chr3:23072786-23080563 REVERSE	#N/A	35	35	endoplasmic reticulum	ER	X	n.a	n.a	n.a	0	0	0	0
AT1G79650.2;AT1G79650.1;AT1G79650.4;AT1G16190.2;AT1G79650.3;AT1G16190.1	AT1G79650	4	4	4	11	11	11	39.157	0	4.2814	76456000	14	3	0.120596	NaN	-1.04517	3	1.16576	4.16576	0.847147	0.307692	1.15484	HC	DNA.repair	Symbols: RAD23 | RAD23; damaged DNA binding | chr1:29972108-29975271 REVERSE	PF00240,PF00627,PF00627,PF09280	28	28.2	nucleus	N	X	n.a	n.a	n.a	0	0	0	0
AT3G07160.1;AT3G07160.3;AT3G07160.2	AT3G07160	16	16	13	11.6	11.6	9.4	217.08	0	39.358	663850000	94	49	-1.2713	-1.61032	-1.39981	0.339024	0.128517	0.467541	0.538962	0.615385	1.15435	HC	minor CHO metabolism.callose	Symbols: ATGSL10, gsl10 | ATGSL10 (glucan synthase-like 10); 1,3-beta-glucan synthase | chr3:2264945-2279383 REVERSE	PF02364,PF02364,PF14288	3	3.6	plasma membrane	PM	X	n.a	n.a	n.a	0	0	0	0
AT5G13930.1	AT5G13930	12	12	12	37.7	37.7	37.7	43.115	0	180.49	3527500000	16	67	0.0618106	-0.285207	-0.0562786	0.347018	0.118089	0.465107	0.538759	0.615385	1.15414	HC	secondary metabolism.flavonoids.chalcones.naringenin-chalcone synthase	Symbols: CHS, TT4, ATCHS | TT4 (TRANSPARENT TESTA 4); naringenin-chalcone synthase | chr5:4488688-4490264 FORWARD	PF02797,PF00195	16	16.8	endoplasmic reticulum	ER	X	n.a	n.a	n.a	0	0	0	0
AT1G48630.1	AT1G48630	17	10	3	53.4	38	14.7	35.8	0	102.22	1998500000	20	28	-1.3299	NaN	0.282087	3	-1.61198	1.38802	0.615668	0.538462	1.15413	HC	signalling.G-proteins	Symbols: RACK1B_AT | RACK1B_AT (RECEPTOR FOR ACTIVATED C KINASE 1 B); nucleotide binding | chr1:17981773-17983327 REVERSE	PF00400,PF00400,PF00400,PF00400,PF00400,PF00400,PF00400	30	30.5	cytosol	C	X	n.a	n.a	n.a	0	0	0	0
AT1G48610.1;AT1G48610.2	AT1G48610	9	9	9	44.3	44.3	44.3	21.674	0	32.939	1641100000	10	37	0.896218	-0.25919	NaN	1.15541	3	4.15541	0.846284	0.307692	1.15398	HC	RNA.regulation of transcription.putative transcription regulator	AT hook motif-containing protein | chr1:17970678-17973303 REVERSE	#N/A	27	27.3	nucleus	N	X	n.a	n.a	n.a	0	0	0	0
AT5G64570.1;AT5G64570.2;AT5G64570.3	AT5G64570	19	19	16	34.1	34.1	30.4	84.307	0	308.1	3433600000	36	78	-0.95306	0.0227967	0.387403	-0.975857	-1.34046	-2.31632	0.306973	0.846154	1.15313	HC	cell wall.degradation.mannan-xylose-arabinose-fucose	Symbols: XYL4, ATBXL4 | XYL4; hydrolase, hydrolyzing O-glycosyl compounds / xylan 1,4-beta-xylosidase | chr5:25810115-25813335 REVERSE	PF00933,PF14310,PF01915	10	10.6	extracellular	EX	X	n.a	n.a	n.a	0	0	0	0
AT1G77840.1	AT1G77840	5	3	3	14.6	12.1	12.1	48.64	0	9.0343	34801000	26	5	-0.797207	NaN	-1.93692	3	1.13972	4.13972	0.844976	0.307692	1.15267	HC	protein.synthesis.initiation	eukaryotic translation initiation factor 5, putative / eIF-5, putative | chr1:29268487-29270586 FORWARD	PF01873,PF02020	29	29.2	cytosol	C	X	n.a	n.a	n.a	0	0	0	0
AT1G73650.1;AT1G73650.4;AT1G73650.5;AT1G73650.2;AT1G73650.3	AT1G73650	3	3	3	15.9	15.9	15.9	23.73	0	9.9561	185040000	8	7	0.000920719	-0.192201	-0.251878	0.193122	0.252798	0.44592	0.53716	0.615385	1.15254	HC	not assigned.unknown	oxidoreductase, acting on the CH-CH group of donors | chr1:27688123-27690307 REVERSE	PF06966	35	35	plasma membrane,vacuole,golgi	PM,V,G	X	n.a	n.a	n.a	0	0	0	0
AT1G71040.1	AT1G71040	14	14	14	33.6	33.6	33.6	66.164	0	159.29	4252300000	23	145	0.199217	-0.238725	0.19217	0.437942	0.00704656	0.444988	0.537082	0.615385	1.15247	HC	misc.oxidases - copper, flavone etc	Symbols: LPR2 | LPR2 (Low Phosphate Root2); copper ion binding / oxidoreductase | chr1:26796966-26800322 REVERSE	PF00394,PF07731	26	26.7	extracellular	EX	Likely PD protein	n.a	n.a	n.a	0	0	0	0
AT5G05610.2;AT5G05610.1	AT5G05610	2	2	2	7.9	7.9	7.9	27.223	0	8.394	75355000	8	8	-0.154281	NaN	-1.29099	3	1.13671	4.13671	0.844726	0.307692	1.15242	HC	RNA.regulation of transcription.Alfin-like	Symbols: AL1 | AL1 (ALFIN-LIKE 1); DNA binding / methylated histone residue binding | chr5:1676991-1679104 REVERSE	PF00628,PF12165	27	27.3	nucleus	N	X	n.a	n.a	n.a	0	0	0	0
AT5G42020.3;AT5G42020.1;AT5G42020.2	AT5G42020	52	50	5	61.7	59.1	9.7	74.374	0	323.31	50620000000	32	820	1.46899	0.753154	1.74044	0.715839	-0.271451	0.444387	0.537032	0.615385	1.15242	HC	stress.abiotic.heat	Symbols: BIP, BIP2 | BIP2; ATP binding | chr5:16807483-16810646 REVERSE	PF00012	20	20.2	endoplasmic reticulum	ER	X	n.a	n.a	n.a	0	0	0	0
AT1G09070.1	AT1G09070	4	4	4	16.7	16.7	16.7	34.189	0	6.1978	328020000	9	11	-0.220898	-0.751372	-0.133875	0.530474	-0.0870234	0.443451	0.536954	0.615385	1.15234	HC	protein.targeting.secretory pathway.vacuole	Symbols: SRC2, (AT)SRC2 | SRC2 (SOYBEAN GENE REGULATED BY COLD-2); protein binding | chr1:2927703-2928968 FORWARD	PF00168	29	29.3.4	endoplasmic reticulum,vacuole	ER,V	X	n.a	n.a	n.a	0	0	0	0
AT3G48670.3;AT3G48670.2;AT3G48670.1	AT3G48670	5	5	3	9.1	9.1	6	74.824	0	11.831	246900000	42	7	-0.656615	NaN	-1.78073	3	1.12411	4.12411	0.843676	0.307692	1.15137	HC	RNA.regulation of transcription.putative transcription regulator	XH/XS domain-containing protein / XS zinc finger domain-containing protein | chr3:18030781-18034065 FORWARD	PF03468,PF03469,PF03470	27	27.3	nucleus	N	X	n.a	n.a	n.a	0	0	0	0
AT1G79990.2;AT1G79990.1	AT1G79990	21	10	10	30.9	14.6	14.6	103.01	0	57.928	622360000	46	31	-0.94258	-1.35073	-0.952102	0.408148	0.00952227	0.417671	0.534806	0.615385	1.15019	HC	cell.vesicle transport	protein binding / structural molecule | chr1:30084114-30092238 FORWARD	PF00400,PF00400,PF00400,PF00400,PF04053	31	31.4	plasma membrane,cytosol,endoplasmic reticulum	PM,C,ER	X	n.a	n.a	n.a	0	0	0	0
AT4G10060.2;AT4G10060.1	AT4G10060	12	12	11	16.7	16.7	15.9	104.35	0	41.809	736510000	40	35	-0.918625	-1.27363	-0.975558	0.355009	0.0569327	0.411941	0.534328	0.615385	1.14971	HC	not assigned.unknown	catalytic/ glucosylceramidase | chr4:6288827-6295402 FORWARD	PF12215,PF04685	35	35	endoplasmic reticulum	ER	X	n.a	n.a	n.a	0	0	0	0
AT5G58140.3;AT5G58140.7;AT5G58140.6;AT5G58140.5;AT5G58140.2;AT5G58140.1;AT5G58140.4	AT5G58140	22	22	19	28.8	28.8	24.7	100.79	0	144	1249200000	46	73	-0.856361	-1.25194	-0.872116	0.395575	0.0157551	0.41133	0.534278	0.615385	1.14966	HC	signaling.kinase.cytoplasmatic kinase.AGC	Symbols: PHOT2, NPL1 | PHOT2 (PHOTOTROPIN 2); FMN binding / blue light photoreceptor/ kinase/ protein serine/threonine kinase | chr5:23524427-23533111 FORWARD	PF00069,PF13426,PF13426	30	30.30.1.1	plasma membrane	PM	X	n.a	n.a	n.a	0	0	0	0
AT2G39260.1	AT2G39260	12	12	12	14.1	14.1	14.1	133.96	0	46.495	345740000	68	24	-1.01217	NaN	-2.1158	3	1.10364	4.10364	0.84197	0.307692	1.14966	HC	protein.synthesis.misc	RNA binding / binding / protein binding | chr2:16392047-16399680 REVERSE	PF02854,PF02854,PF02854,PF04050	29	29.2	nucleus	N	X	n.a	n.a	n.a	0	0	0	0
AT3G55360.1	AT3G55360	6	6	6	18.1	18.1	18.1	35.723	0	64.107	734640000	13	33	0.123176	-0.200357	0.0375436	0.323533	0.0856324	0.409165	0.534097	0.615385	1.14948	HC	lipid metabolism.'exotics' (steroids, squalene etc).trans-2-enoyl-CoA reductase (NADPH)	Symbols: CER10, ECR, ATTSC13, TSC13 | CER10; 3-oxo-5-alpha-steroid 4-dehydrogenase/ fatty acid elongase/ trans-2-enoyl-CoA reductase (NADPH) | chr3:20520930-20523014 REVERSE	PF02544	11	11.8	endoplasmic reticulum,plasma membrane	ER,PM	X	n.a	n.a	n.a	0	0	0	0
AT5G22860.8;AT5G22860.3;AT5G22860.2;AT5G22860.4;AT5G22860.7;AT5G22860.6;AT5G22860.5;AT5G22860.1	AT5G22860	3	3	3	12.3	12.3	12.3	41.222	0	75.523	132310000	20	18	-0.81436	-0.784528	-1.25286	-0.0298325	0.4385	0.408667	0.534056	0.615385	1.14944	HC	protein.degradation	serine carboxypeptidase S28 family protein | chr5:7639318-7642984 REVERSE	PF05577	29	29.5	extracellular	EX	X	n.a	n.a	n.a	0	0	0	0
AT1G24190.2;AT1G24190.1;AT1G24190.3;AT1G70060.2;AT1G70060.1	AT1G24190	4	4	4	3.5	3.5	3.5	150.82	0	7.2622	57258000	71	11	-1.43532	NaN	-2.53356	3	1.09824	4.09824	0.84152	0.307692	1.14921	HC	not assigned.no ontology.paired amphipathic helix repeat-containing protein	Symbols: SIN3, ATSIN3, SNL3 | SNL3 (SIN3-LIKE 3); transcription repressor | chr1:8563558-8569996 REVERSE	PF02671,PF02671,PF02671,PF08295,PF16879	35	35	nucleus	N	X	n.a	n.a	n.a	0	0	0	0
AT1G69840.7;AT1G69840.6;AT1G69840.5;AT1G69840.4;AT1G69840.3;AT1G69840.2;AT1G69840.1	AT1G69840	13	13	12	46.2	46.2	43.7	31.405	0	78.263	1705700000	19	68	0.239875	-0.0216403	0.0955699	0.261515	0.144305	0.40582	0.533818	0.615385	1.1492	HC	not assigned.no ontology	band 7 family protein | chr1:26293660-26295834 REVERSE	PF01145	35	35	plasma membrane,cytosol,peroxisome	PM,C,PX	X	n.a	n.a	n.a	0	0	0	0
AT3G61220.1;AT3G61220.2;AT3G61220.3	AT3G61220	11	11	11	52.7	52.7	52.7	32.803	0	145.43	2635100000	19	51	-1.01395	NaN	0.668383	3	-1.68234	1.31766	0.609805	0.538462	1.14827	HC	misc.short chain dehydrogenase/reductase (SDR)	short-chain dehydrogenase/reductase (SDR) family protein | chr3:22662960-22664493 FORWARD	PF00106,PF13561	26	26.22	cytosol	C	X	n.a	n.a	n.a	0	0	0	0
AT3G11130.1	AT3G11130	92	21	21	64.2	18.1	18.1	193.24	0	323.31	10202000000	88	183	-0.494415	-1.25823	-0.118402	0.763815	-0.376013	0.387802	0.532317	0.615385	1.1477	HC	cell.vesicle transport	clathrin heavy chain, putative | chr3:3482149-3491908 REVERSE	PF00637,PF00637,PF00637,PF00637,PF00637,PF00637,PF00637,PF01394,PF01394,PF09268,PF13838	31	31.4	endoplasmic reticulum	ER	X	n.a	n.a	n.a	0	0	0	0
AT3G02900.1;AT3G02900.2	AT3G02900	4	4	4	24.7	24.7	24.7	17.321	0	7.0354	99467000	8	7	-0.258555	-0.503972	-0.400125	0.245416	0.14157	0.386986	0.532249	0.615385	1.14763	HC	not assigned.unknown	unknown protein | chr3:645810-647648 FORWARD	#N/A	35	35	plastid,extracellular	P,EX	X	n.a	n.a	n.a	0	0	0	0
AT2G06990.1	AT2G06990	3	3	3	4	4	4	111.89	0	6.0318	54342000	57	3	-0.480677	NaN	-1.53593	3	1.05525	4.05525	0.837938	0.307692	1.14563	HC	protein.synthesis.ribosome biogenesis.Pre-rRNA processing and modifications.DExD-box helicases	Symbols: HEN2 | HEN2 (hua enhancer 2); ATP-dependent helicase/ RNA helicase | chr2:2894940-2901078 FORWARD	PF00270,PF00271,PF08148,PF13234	29	29.2	nucleus	N	X	n.a	n.a	n.a	0	0	0	0
AT4G23630.2;AT4G23630.1	AT4G23630	8	8	4	26.5	26.5	18.2	30.528	0	25.156	4082300000	8	67	0.545991	0.325862	0.404741	0.220128	0.14125	0.361378	0.530115	0.615385	1.1455	HC	stress.biotic	Symbols: BTI1 | BTI1 (VIRB2-INTERACTING PROTEIN 1) | chr4:12317059-12319937 FORWARD	PF02453	20	20.1	plasma membrane	PM	X	n.a	n.a	n.a	0	0	0	0
AT3G44590.2;AT3G44590.1	AT3G44590	8	6	6	77.5	62.2	62.2	11.015	0	52.915	1801100000	5	44	1.03826	NaN	-0.00133307	3	1.03959	4.03959	0.836633	0.307692	1.14432	HC	protein.synthesis.ribosomal protein.eukaryotic.60S subunit.P2	60S acidic ribosomal protein P2 (RPP2D) | chr3:16163850-16164931 FORWARD	PF00428	29	29.2.1.2	cytosol	C	X	n.a	n.a	n.a	0	0	0	0
AT4G31120.1;AT4G31120.2	AT4G31120	8	8	8	23.5	23.5	23.5	71.87	0	59.86	464900000	28	16	-0.136674	NaN	-1.17075	3	1.03408	4.03408	0.836173	0.307692	1.14387	HC	C1-metabolism	Symbols: SKB1, ATPRMT5 | SKB1 (SHK1 BINDING PROTEIN 1); protein methyltransferase | chr4:15132011-15136639 REVERSE	PF05185,PF17285,PF17286	25	25	cytosol	C	X	n.a	n.a	n.a	0	0	0	0
AT4G38350.2;AT4G38350.1	AT4G38350	16	16	16	16	16	16	142.68	0	93.688	990760000	52	41	-0.854841	-1.12768	-0.918674	0.272841	0.0638325	0.336673	0.528056	0.615385	1.14344	HC	not assigned.no ontology	hedgehog receptor | chr4:17958177-17966417 REVERSE	PF02460,PF02460,PF16414	35	35	vacuole,plasma membrane	V,PM	X	n.a	n.a	n.a	0	0	0	0
AT2G04780.2;AT2G04780.1	AT2G04780	5	5	5	21.3	21.3	21.3	26.845	0	58.418	2803100000	8	30	-0.601161	0.261896	0.969446	-0.863057	-1.57061	-2.43367	0.297195	0.846154	1.14335	HC	cell wall.cell wall proteins.AGPs.AGP	Symbols: FLA7 | FLA7 (FASCICLIN-LIKE ARABINOOGALACTAN 7) | chr2:1676742-1678455 FORWARD	PF02469	10	10.5	extracellular,plasma membrane	EX,PM	X	n.a	n.a	n.a	0	0	0	0
AT2G30260.2;AT2G30260.1	AT2G30260	3	3	1	19.1	19.1	11.1	18.488	0	14.908	102280000	7	4	0.21587	NaN	-0.807478	3	1.02335	4.02335	0.835279	0.307692	1.14297	HC	RNA.processing.splicing	Symbols: U2B'' | U2B'' (U2 small nuclear ribonucleoprotein B); RNA binding / nucleic acid binding / nucleotide binding | chr2:12905402-12907509 REVERSE	PF00076,PF00076	27	27.1	nucleus	N	X	n.a	n.a	n.a	0	0	0	0
AT1G31440.1	AT1G31440	8	8	8	28.7	28.7	28.7	49.258	0	65.635	421660000	25	20	-0.565901	-0.613237	-0.846137	0.0473363	0.280236	0.327572	0.527298	0.615385	1.14268	HC	cell.vesicle transport	SH3 domain-containing protein 1 (SH3P1) | chr1:11255836-11258715 REVERSE	PF14604	31	31.4	plasma membrane	PM	X	n.a	n.a	n.a	0	0	0	0
AT1G67730.1	AT1G67730	9	9	9	37.4	37.4	37.4	35.761	0	56.307	1265800000	18	49	-0.286564	-0.610347	-0.28517	0.323782	-0.00139435	0.322388	0.526866	0.615385	1.14225	HC	secondary metabolism.wax	Symbols: YBR159, KCR1 | YBR159; ketoreductase/ oxidoreductase | chr1:25391460-25393610 FORWARD	PF00106	16	16.7	endoplasmic reticulum	ER	X	n.a	n.a	n.a	0	0	0	0
AT1G28110.2;AT1G28110.1	AT1G28110	9	9	9	25.2	25.2	25.2	51.802	0	38.691	361670000	21	19	-0.486324	-0.467622	-0.816639	-0.0187019	0.330315	0.311613	0.525968	0.615385	1.14135	HC	protein.degradation.serine protease	Symbols: SCPL45 | SCPL45 (SERINE CARBOXYPEPTIDASE-LIKE 45 PRECURSOR); serine-type carboxypeptidase | chr1:9803865-9806896 REVERSE	PF00450	29	29.5.5	extracellular	EX	X	n.a	n.a	n.a	0	0	0	0
AT2G29210.2;AT2G29210.1	AT2G29210	3	3	3	3.5	3.5	3.5	98.505	0.00019869	3.5053	22272000	42	7	-0.517198	-1.5169	NaN	0.999705	3	3.9997	0.833309	0.307692	1.141	HC	RNA.processing.splicing	splicing factor PWI domain-containing protein | chr2:12558051-12562348 FORWARD	PF01480	27	27.1	nucleus	N	X	n.a	n.a	n.a	0	0	0	0
AT4G35790.1;AT4G35790.2;AT4G35790.3	AT4G35790	23	23	23	29.7	29.7	29.7	98.916	0	72.464	1991400000	51	79	-0.525317	-0.965615	-0.384324	0.440298	-0.140993	0.299305	0.524942	0.615385	1.14033	HC	lipid metabolism.lipid degradation.lysophospholipases.phospholipase D	Symbols: ATPLDDELTA, PLDDELTA | ATPLDDELTA; phospholipase D | chr4:16955518-16960170 REVERSE	PF00168,PF00614,PF00614,PF12357	11	11.9	cytosol,plasma membrane	C,PM	X	n.a	n.a	n.a	0	0	0	0
AT4G12590.1	AT4G12590	4	4	4	20.7	20.7	20.7	27.914	0	58.439	272270000	14	17	-0.318928	-0.30539	-0.618498	-0.0135383	0.29957	0.286032	0.523836	0.615385	1.13922	HC	not assigned.unknown	unknown protein | chr4:7451004-7453088 REVERSE	PF01956	35	35	endoplasmic reticulum	ER	X	n.a	n.a	n.a	0	0	0	0
AT2G35860.1	AT2G35860	7	5	5	24.7	15.7	15.7	49.1	0	70.578	2167300000	22	38	0.0572391	0.339505	-0.510887	-0.282266	0.568126	0.28586	0.523822	0.615385	1.13921	HC	not assigned.no ontology	Symbols: FLA16 | FLA16 (FASCICLIN-LIKE ARABINOGALACTAN PROTEIN 16 PRECURSOR) | chr2:15059763-15062122 FORWARD	PF02469,PF02469	35	35	extracellular	EX	X	n.a	n.a	n.a	0	0	0	0
AT5G22120.1	AT5G22120	2	2	2	8.1	8.1	8.1	42.092	0	7.8763	22404000	23	3	-0.537452	NaN	-1.51436	3	0.976906	3.97691	0.831409	0.307692	1.1391	HC	not assigned.unknown	unknown protein | chr5:7334378-7336814 REVERSE	#N/A	35	35	cytosol	C	X	n.a	n.a	n.a	0	0	0	0
AT3G07220.1	AT3G07220	9	9	9	31.2	31.2	31.2	35.993	0	66.331	305050000	20	26	-0.175781	-1.15139	NaN	0.975605	3	3.97561	0.8313	0.307692	1.13899	HC	RNA.regulation of transcription.FHA transcription factor	transcriptional activator, putative | chr3:2297886-2299572 FORWARD	PF00498	27	27.3	nucleus	N	X	n.a	n.a	n.a	0	0	0	0
AT1G07670.2;AT1G07670.1	AT1G07670	11	11	2	12.7	12.7	2.3	116.18	0	65.078	531930000	46	30	-0.856101	-0.7971	-1.19598	-0.0590006	0.339881	0.280881	0.523407	0.615385	1.13879	HC	transport.calcium	Symbols: ATECA4, ECA4 | calcium-transporting ATPase | chr1:2370052-2374545 REVERSE	PF00122,PF00689,PF00690,PF00702	34	34.21	endoplasmic reticulum	ER	X	n.a	n.a	n.a	0	0	0	0
AT5G12410.1	AT5G12410	2	2	2	7.4	7.4	7.4	41.94	0	20.514	154590000	24	20	-0.473063	NaN	-1.44164	3	0.968578	3.96858	0.830715	0.307692	1.13841	HC	not assigned.no ontology	THUMP domain-containing protein | chr5:4021815-4023988 REVERSE	PF02926	35	35	nucleus	N	X	n.a	n.a	n.a	0	0	0	0
AT5G14540.1	AT5G14540	5	5	5	8.6	8.6	8.6	59.097	0	9.4566	139820000	23	13	-0.528821	NaN	-1.4955	3	0.966679	3.96668	0.830557	0.307692	1.13825	HC	RNA.regulation of transcription.Trihelix, Triple-Helix transcription factor family	proline-rich family protein | chr5:4687147-4689674 REVERSE	PF07223	27	27.3	nucleus	N	X	n.a	n.a	n.a	0	0	0	0
AT2G33120.1;AT2G33120.2;AT1G04750.1;AT1G04750.4;AT1G04750.3;AT1G04750.2;AT1G04760.2;AT1G04760.1;AT2G32670.1	AT2G33120	7	7	7	29.4	29.4	29.4	24.928	0	21.144	1307100000	15	48	-0.235014	-0.616942	-0.125033	0.381927	-0.109981	0.271946	0.522662	0.615385	1.13805	HC	cell.vesicle transport	Symbols: SAR1, VAMP722, ATVAMP722 | SAR1 (SYNAPTOBREVIN-RELATED PROTEIN 1) | chr2:14043459-14045543 REVERSE	PF00957,PF13774	31	31.4	plasma membrane,mitochondrion	PM,M	X	n.a	n.a	n.a	0	0	0	0
AT4G23690.1	AT4G23690	8	8	7	42.2	42.2	36.9	21.412	0	84.587	3741800000	8	70	0.945464	0.577704	1.04428	0.36776	-0.0988169	0.268943	0.522412	0.615385	1.1378	HC	stress.biotic.PR-proteins	disease resistance-responsive family protein / dirigent family protein | chr4:12338871-12339747 REVERSE	PF03018	20	20.1	extracellular	EX	X	n.a	n.a	n.a	0	0	0	0
AT1G30690.2;AT1G30690.1	AT1G30690	24	24	24	51.1	51.1	51.1	61.189	0	299.59	6080000000	28	152	-0.0903489	-0.923593	0.474149	0.833245	-0.564498	0.268747	0.522396	0.615385	1.13778	HC	protein.targeting.secretory pathway.unspecified	SEC14 cytosolic factor family protein / phosphoglyceride transfer family protein | chr1:10887705-10890315 FORWARD	PF03765,PF00650	29	29.3.4	plasma membrane,cytosol	PM,C	X	n.a	n.a	n.a	0	0	0	0
AT1G19360.2;AT1G19360.1	AT1G19360	2	2	2	8.2	8.2	8.2	48.251	0	15.504	51099000	22	5	-0.340966	NaN	-1.2944	3	0.953437	3.95344	0.829453	0.307692	1.13715	HC	not assigned.unknown	LOCATED IN: endoplasmic reticulum; EXPRESSED IN: 23 plant structures; EXPRESSED DURING: 13 growth stages; CONTAINS InterPro DOMAIN/s: Reticulon (InterPro:IPR003388); BEST Arabidopsis thaliana protein match is: RRA2 (REDUCED RESIDUAL ARABINOSE 2) (TAIR:AT1G75110.1); Has 165 Blast hits to 162 proteins in 14 species: Archae - 0; Bacteria - 0; Metazoa - 0; Fungi - 0; Plants - 152; Viruses - 0; Other …	PF03407	35	35	golgi	G	X	n.a	n.a	n.a	0	0	0	0
AT3G45600.1;AT3G45600.2	AT3G45600	9	9	9	23.5	23.5	23.5	31.888	0	30.809	537490000	14	23	-0.167108	-0.285868	-0.298481	0.11876	0.131373	0.250133	0.520844	0.615385	1.13623	HC	development.unspecified	Symbols: TET3 | TET3 (TETRASPANIN3) | chr3:16733755-16735951 REVERSE	PF00335	33	33.99	plasma membrane	PM	Likely PD protein	n.a	n.a	n.a	0	0	0	0
AT4G20260.9;AT4G20260.8;AT4G20260.7;AT4G20260.3;AT4G20260.2;AT4G20260.10;AT4G20260.1;AT4G20260.4;AT4G20260.6	AT4G20260	27	27	27	74.2	74.2	74.2	24.584	0	323.31	24248000000	14	287	0.453081	1.34047	2.08509	-0.887394	-1.63201	-2.5194	0.29005	0.846154	1.1362	HC	signalling.phosphinositides	Symbols: ATPCAP1, PCAP1 | DREPP plasma membrane polypeptide family protein | chr4:10940739-10943502 FORWARD	PF05558	30	30.4	plasma membrane,cytosol	PM,C	X	n.a	n.a	n.a	0	0	0	0
AT5G10840.1	AT5G10840	9	2	2	14	3.7	3.7	74.466	0	17.559	120360000	22	7	-0.438293	NaN	-1.37746	3	0.939165	3.93916	0.828264	0.307692	1.13596	HC	not assigned.unknown	endomembrane protein 70, putative | chr5:3424688-3427878 REVERSE	PF02990	35	35	golgi	G	X	n.a	n.a	n.a	0	0	0	0
AT4G01700.1	AT4G01700	10	10	10	52.9	52.9	52.9	31.464	0	147.45	1322400000	14	63	-0.069433	0.0330579	-0.40699	-0.102491	0.337557	0.235066	0.519589	0.615385	1.13497	HC	stress.biotic	chitinase, putative | chr4:732313-733510 REVERSE	PF00182	20	20.1	extracellular	EX	X	n.a	n.a	n.a	0	0	0	0
AT5G07830.1	AT5G07830	11	11	11	33.3	33.3	33.3	60.25	0	142.63	2358000000	26	61	-0.367603	-0.742725	-0.226123	0.375122	-0.14148	0.233642	0.51947	0.615385	1.13485	HC	not assigned.no ontology	Symbols: AtGUS2 | AtGUS2 (Arabidopsis thaliana glucuronidase 2); beta-glucuronidase | chr5:2503323-2506688 FORWARD	PF03662	35	35	extracellular	EX	X	n.a	n.a	n.a	0	0	0	0
AT3G05230.1	AT3G05230	3	3	3	22.8	22.8	22.8	19.019	0	6.9158	818600000	9	16	-0.0697194	-0.451929	0.0797773	0.382209	-0.149497	0.232712	0.519393	0.615385	1.13478	HC	protein.degradation	signal peptidase subunit family protein | chr3:1492142-1493619 FORWARD	PF04573	29	29.5	endoplasmic reticulum	ER	X	n.a	n.a	n.a	0	0	0	0
AT5G08080.4;AT5G08080.1;AT5G08080.3;AT5G08080.5;AT5G08080.2	AT5G08080	10	10	10	35.5	35.5	35.5	34.225	0	55.671	748550000	12	46	-0.0143648	0.215147	-0.473874	-0.229512	0.459509	0.229997	0.519166	0.615385	1.13455	HC	cell.vesicle transport	Symbols: SYP132, ATSYP132 | SYP132 (SYNTAXIN OF PLANTS 132); SNAP receptor | chr5:2588342-2591316 FORWARD	PF05739,PF00804	31	31.4	plasma membrane,cytosol	PM,C	X	n.a	n.a	n.a	0	0	0	0
AT1G04040.1	AT1G04040	24	24	19	65.3	65.3	57.6	31.096	0	160.8	49415000000	17	295	1.70794	1.61891	0.646606	0.0890378	1.06134	1.15038	0.595865	0.538462	1.13433	HC	misc.acid and other phosphatases	acid phosphatase class B family protein | chr1:1042362-1043864 REVERSE	PF03767	26	26.13	vacuole	V	X	n.a	n.a	n.a	0	0	0	0
AT1G72610.1	AT1G72610	7	7	7	22.1	22.1	22.1	21.559	0	50.241	10411000000	4	86	1.42895	2.27032	0.364638	-0.841373	1.06431	0.222934	0.518578	0.615385	1.13396	HC	stress.abiotic.unspecified	Symbols: GLP1, ATGER1, GER1 | GER1 (GERMIN-LIKE PROTEIN 1); oxalate oxidase | chr1:27339114-27340044 REVERSE	PF00190	20	20.2	extracellular	EX	X	n.a	n.a	n.a	0	0	0	0
AT2G47240.3;AT2G47240.2;AT2G47240.1;AT2G47240.4	AT2G47240	13	13	13	31.7	31.7	31.7	74.597	0	72.412	1096800000	33	30	-0.833368	-1.4657	-0.419227	0.632332	-0.414141	0.218191	0.518183	0.615385	1.13357	HC	lipid metabolism.FA synthesis and FA elongation.long chain fatty acid CoA ligase	Symbols: CER8, LACS1 | long-chain-fatty-acid--CoA ligase family protein / long-chain acyl-CoA synthetase family protein | chr2:19392558-19397831 FORWARD	PF00501	11	11.1	plasma membrane,peroxisome	PM,PX	X	n.a	n.a	n.a	0	0	0	0
AT2G05920.1	AT2G05920	29	29	29	60.1	60.1	60.1	80.014	0	323.31	11574000000	32	266	-0.10702	-0.389287	-0.0384761	0.282267	-0.068544	0.213723	0.51781	0.615385	1.13319	HC	protein.degradation.subtilases	subtilase family protein | chr2:2269515-2272229 REVERSE	PF00082,PF02225,PF05922,PF17766	29	29.5.1	extracellular	EX	X	n.a	n.a	n.a	0	0	0	0
AT2G01600.1	AT2G01600	5	5	4	13.5	13.5	12.1	63.628	0	47.79	240830000	24	18	-0.915742	-1.09523	-0.947051	0.179484	0.0313088	0.210793	0.517566	0.615385	1.13295	HC	not assigned.no ontology.epsin N-terminal homology (ENTH) domain-containing protein	epsin N-terminal homology (ENTH) domain-containing protein | chr2:268818-272610 FORWARD	PF07651	35	35	plasma membrane	PM	X	n.a	n.a	n.a	0	0	0	0
AT5G51120.1;AT5G51120.2	AT5G51120	2	2	2	12.8	12.8	12.8	25.671	0	12.294	133210000	7	6	0.123575	NaN	-0.777565	3	0.90114	3.90114	0.825095	0.307692	1.13279	HC	RNA.processing.3' end processing.PabN	Symbols: PABN1, ATPABN1 | PABN1 (POLYADENYLATE-BINDING PROTEIN 1); RNA binding / poly(A) binding / protein binding | chr5:20779680-20781530 FORWARD	PF00076	27	27.1	nucleus,cytosol	N,C	X	n.a	n.a	n.a	0	0	0	0
AT4G13770.1	AT4G13770	22	22	22	45.8	45.8	45.8	57.448	0	121.51	4327300000	25	102	-0.0839356	-0.702361	0.327135	0.618426	-0.411071	0.207355	0.51728	0.615385	1.13266	HC	misc.cytochrome P450	Symbols: CYP83A1, REF2 | CYP83A1 (CYTOCHROME P450 83A1); oxidoreductase, acting on paired donors, with incorporation or reduction of molecular oxygen, NADH or NADPH as one donor, and incorporation of one atom of oxygen / oxygen binding | chr4:7990485-7992311 REVERSE	PF00067	26	26.1	endoplasmic reticulum	ER	X	n.a	n.a	n.a	0	0	0	0
AT1G70490.7;AT1G70490.6;AT1G70490.5;AT1G70490.4;AT1G70490.3;AT1G70490.2;AT1G70490.1;AT1G23490.1	AT1G70490	13	13	2	76.2	76.2	16.6	20.592	0	204.45	21128000000	10	224	1.34484	0.733425	1.75016	0.611417	-0.405321	0.206096	0.517175	0.615385	1.13256	HC	protein.postranslational modification	Symbols: ATARFA1D, ARFA1D | ARFA1D; GTP binding / phospholipase activator/ protein binding | chr1:26563924-26565810 REVERSE	PF00025	29	29.4	endoplasmic reticulum,mitochondrion	ER,M	X	n.a	n.a	n.a	0	0	0	0
AT5G11060.1;AT5G25220.2;AT5G25220.1	AT5G11060	5	5	5	13	13	13	44.385	0	9.0666	191820000	15	17	-0.207026	NaN	-1.10496	3	0.897931	3.89793	0.824828	0.307692	1.13252	HC	RNA.regulation of transcription.HB,Homeobox transcription factor family	Symbols: KNAT4 | KNAT4 (KNOTTED1-LIKE HOMEOBOX GENE 4); transcription activator/ transcription factor | chr5:3510118-3513305 FORWARD	PF03789,PF03790,PF03791,PF05920	27	27.3	nucleus	N	X	n.a	n.a	n.a	0	0	0	0
AT3G27530.1	AT3G27530	17	17	17	28	28	28	101.83	0	133.89	1051700000	51	60	-0.564583	NaN	-1.44936	3	0.884777	3.88478	0.823731	0.307692	1.13142	HC	cell.vesicle transport	Symbols: GC6 | GC6 (golgin candidate 6); binding / protein transporter | chr3:10193569-10200013 REVERSE	PF04869,PF04871	31	31.4	golgi	G	X	n.a	n.a	n.a	0	0	0	0
[truncated: 4,050 more rows]

## Sheet: Reference PD proteins
AGI	Reference PMID
AT1G04520	18215111
AT1G05570	27243643
AT1G11130	25256344
AT1G18650	19223515
AT1G22610	28865150
AT1G24150	16313636
[truncated: 441 more rows]
